# Supplementary material
Source: publisher figshare collection journal article supplement (https://acs.figshare.com/ndownloader/files/4298380)
Supplement: Supplementary file 1 [file 4298380]

**Supporting Information**

**Synthesis of** **2-Phenylnaphthalenes through Gold-Catalyzed Dimerization via a Highly Selective Carbon Nucleophile Pathway**

Sinan Wang, Lei Zhang, Xiao Ding, Yu Zhou, Jinfang Wang, Hualiang Jiang, and Hong Liu*

*State Key Laboratory of Drug Research, Shanghai Institute of Materia Medica, Chinese Academy of Sciences, 555 Zuchongzhi Road, Shanghai 201203, China*

E-mail*: hliu@mail.shcnc.ac.cn*

**Table of contents**

**S2. Instrumentation**

**S3. 1H and 13C-NMR spectra of starting materials (compounds 1)**

**S33. 1H and 13C-NMR spectra of products (compounds 2)**

**S59. X-ray crystal structure of compound 2a**

**S60. Labeling studies**

**Instrumentation**

The reagents were purchased from commercial sources and used without further purification. 1H NMR spectra was recorded at 300 MHz, 13C NMR spectra was recorded at 100 MHz, and in CDCl3 (containing 0.03% TMS) solution. 1H NMR spectra was recorded with tetramethylsilane (*δ* = 0.00 ppm) as internal reference; 13C NMR spectra was recorded with CDCl3 (*δ* = 77.00 ppm) as internal reference. Chemical shifts were reported in parts per million (ppm, *δ*) downfield from tetramethylsilane. Proton coupling patterns are described as singlet (s), doublet (d), triplet (t), quartet (q), multiplet (m), and broad (br).

**1H and 13C-NMR spectra of starting materials (compounds 1)**

***N*-butyl-2-(2-ethynylphenyl)acetamide (1a)**


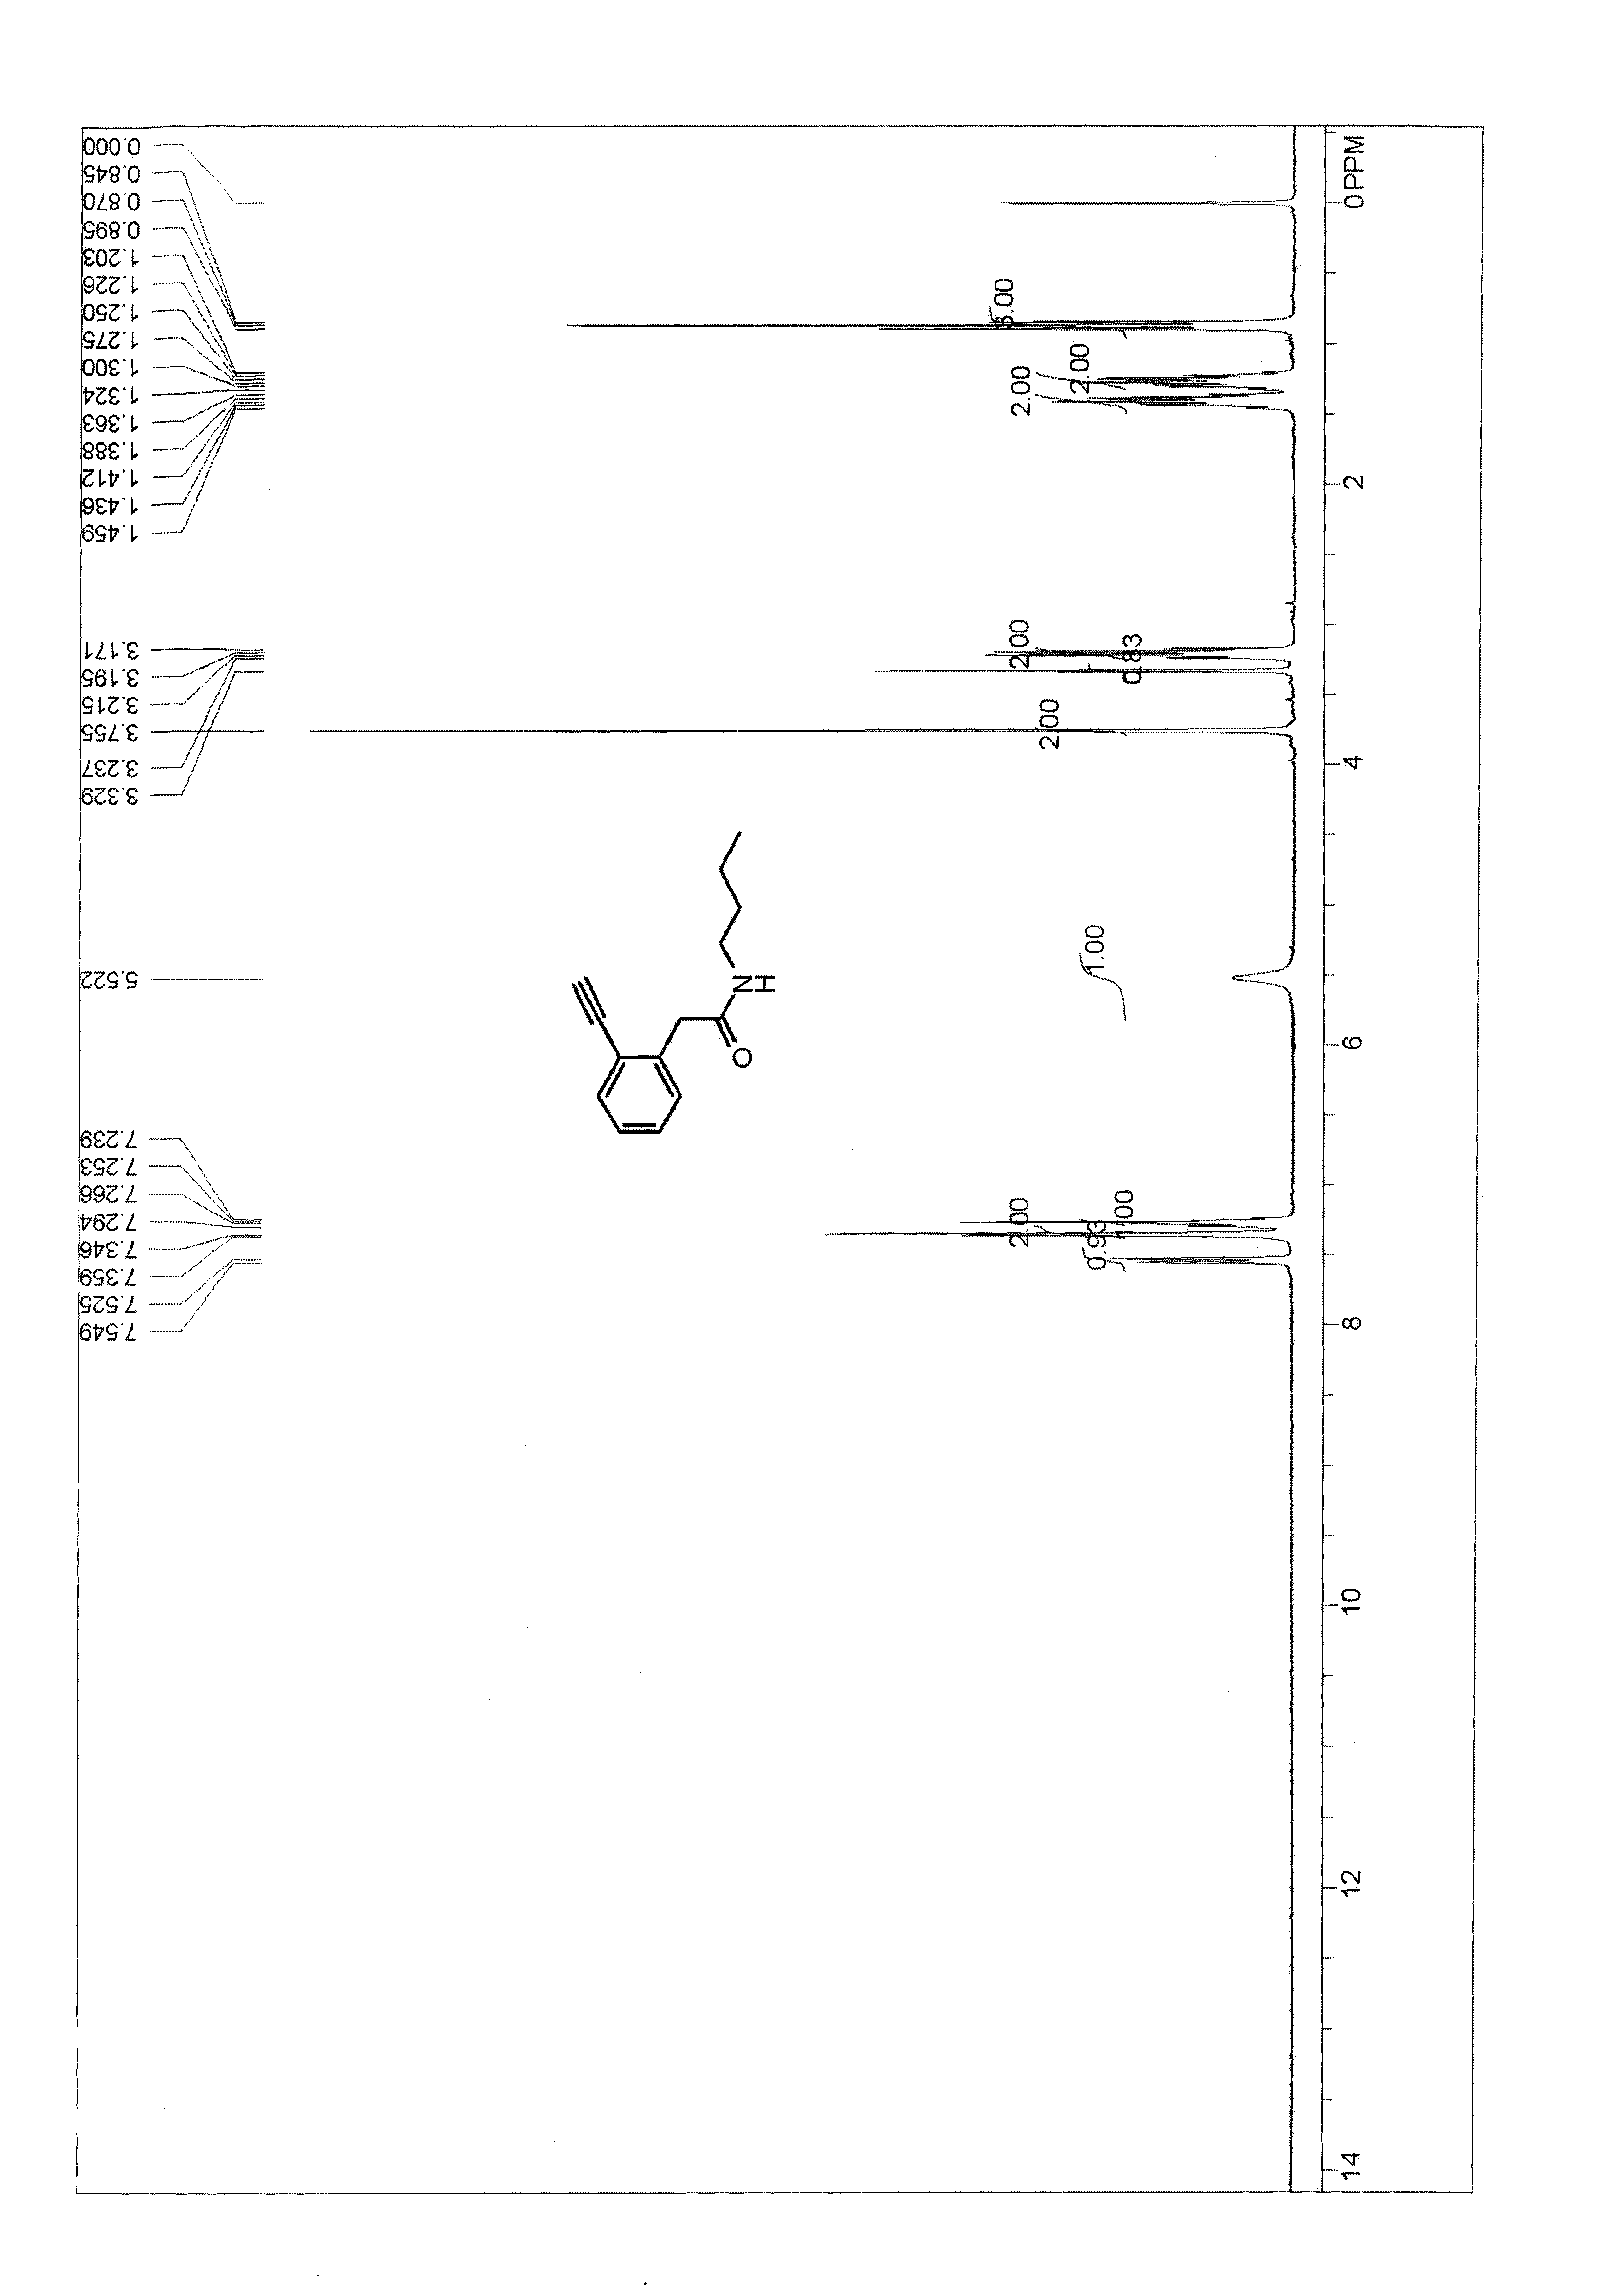


**
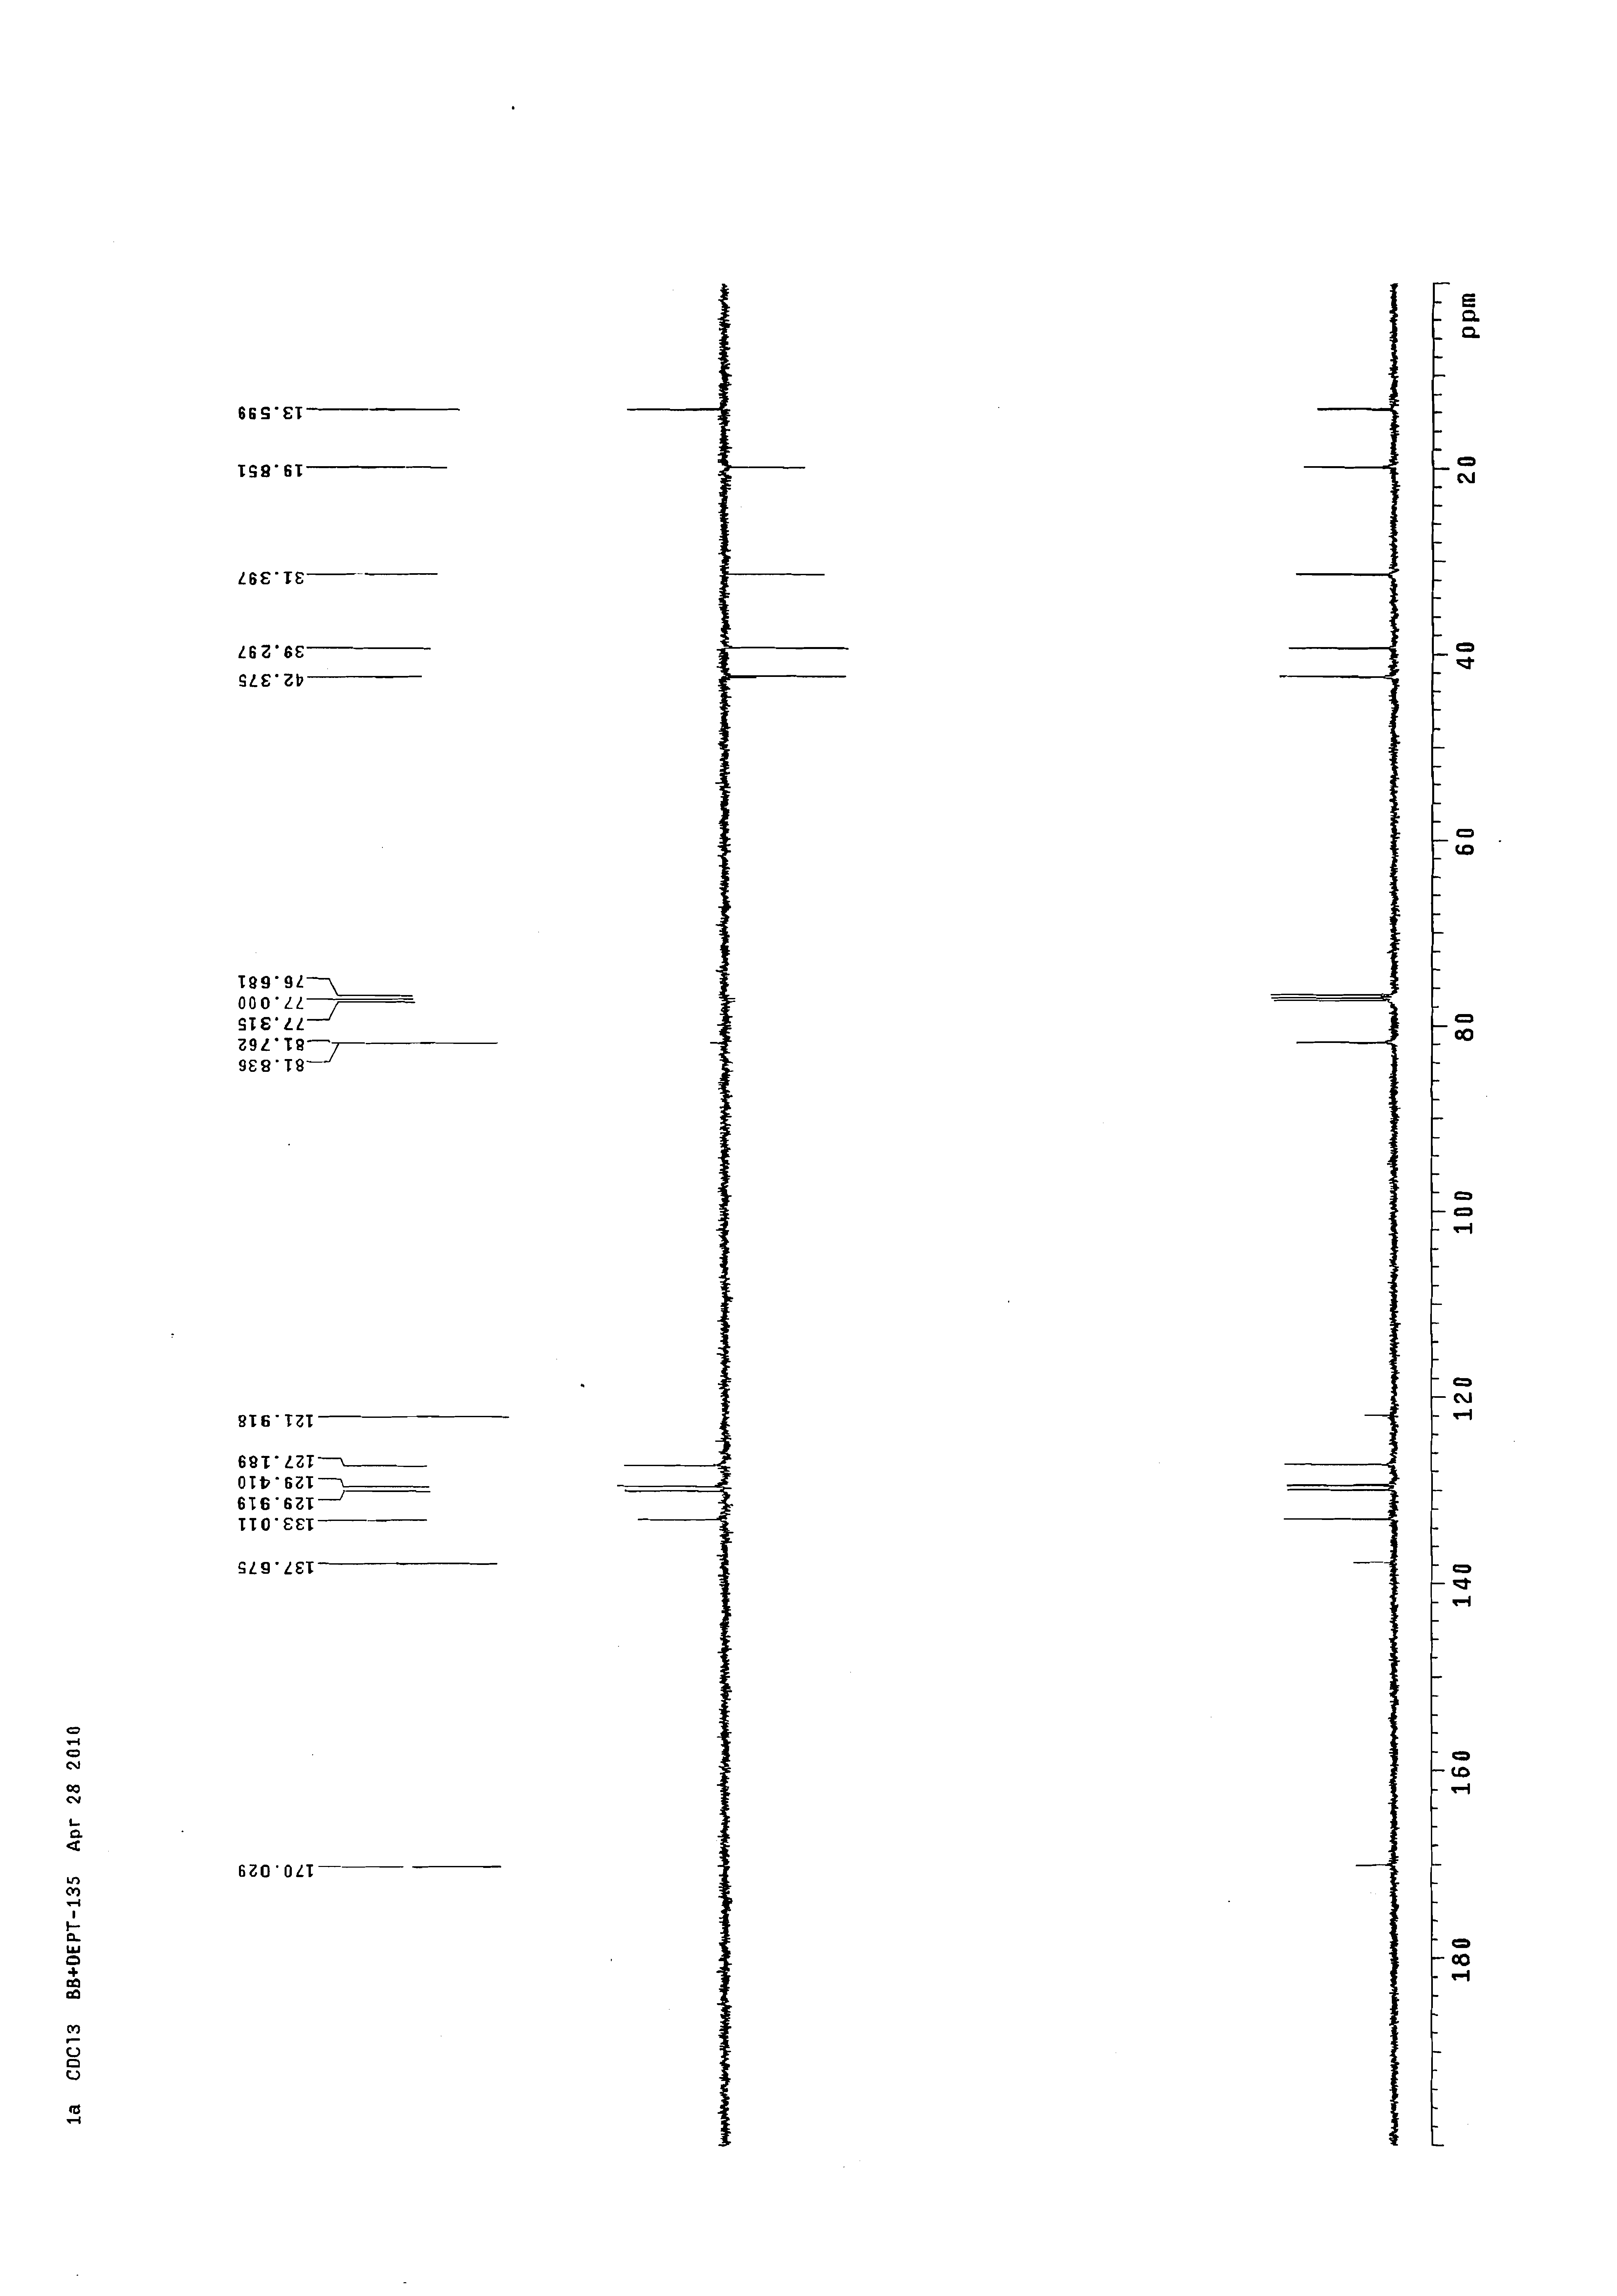
**

**2-(2-ethynylphenyl)acetamide (1b)**

**
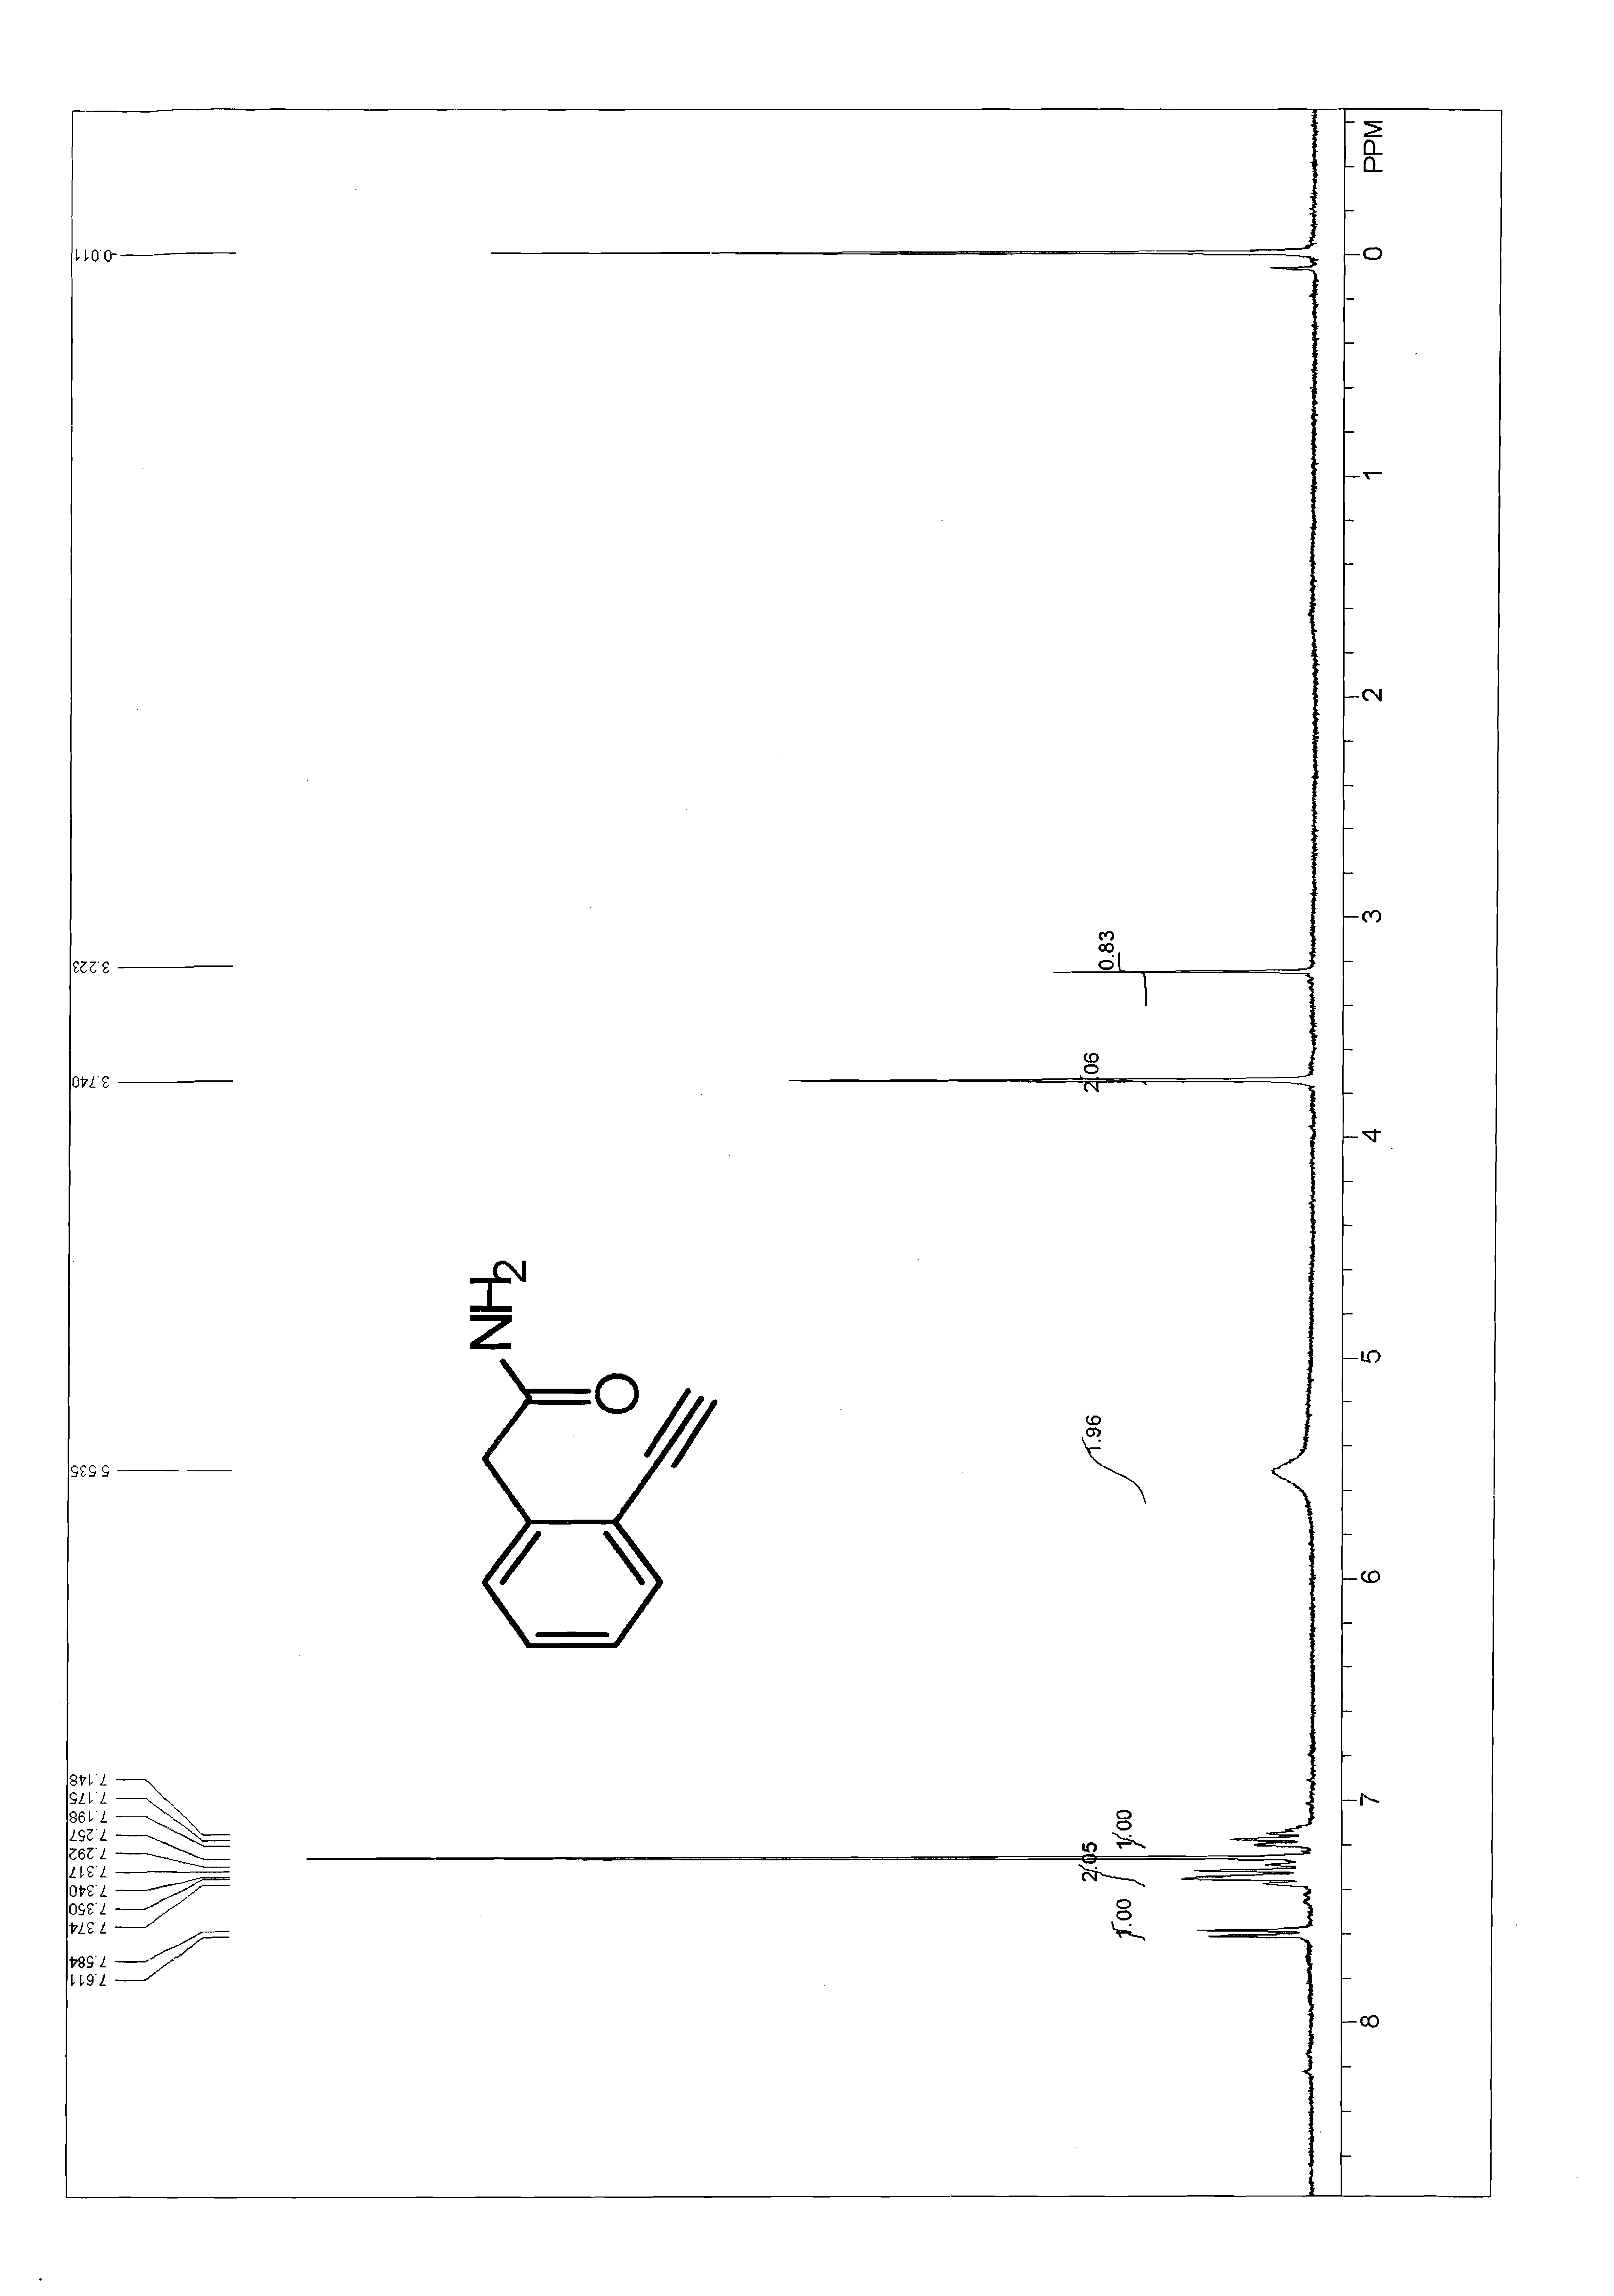
**

**
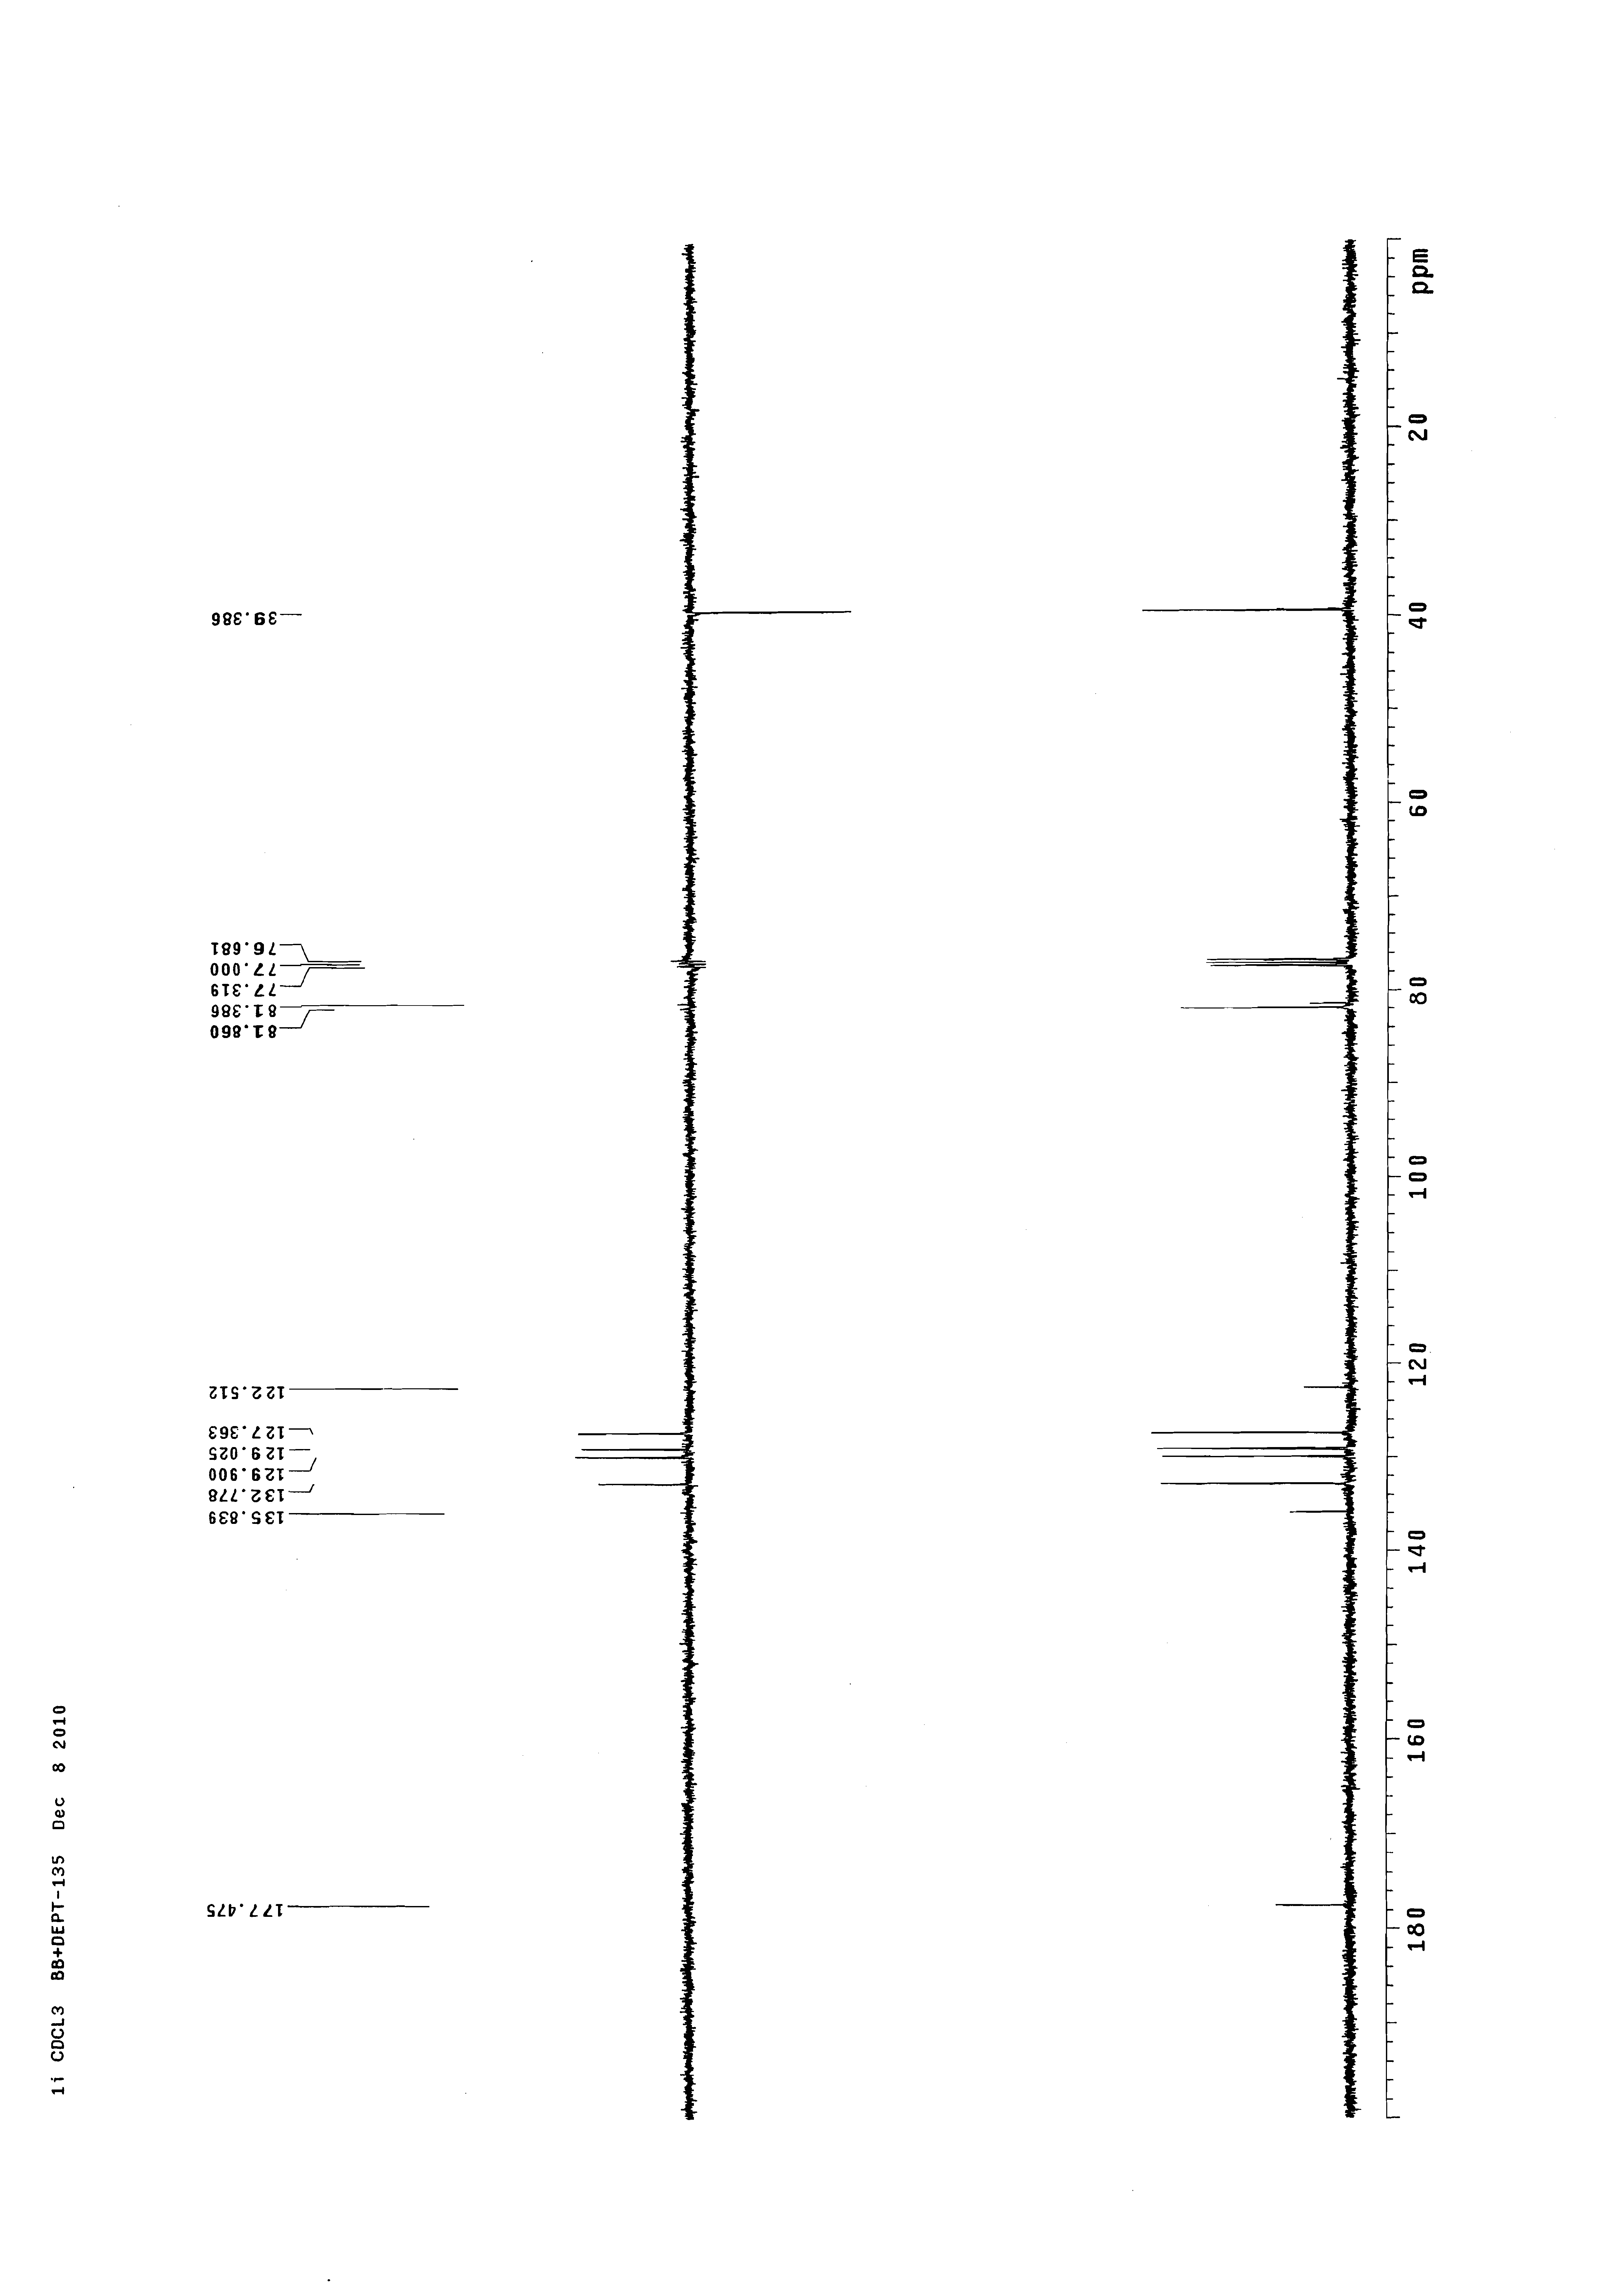
**

**2-(2-ethynylphenyl)-*N*-methylacetamide (1c)**

**
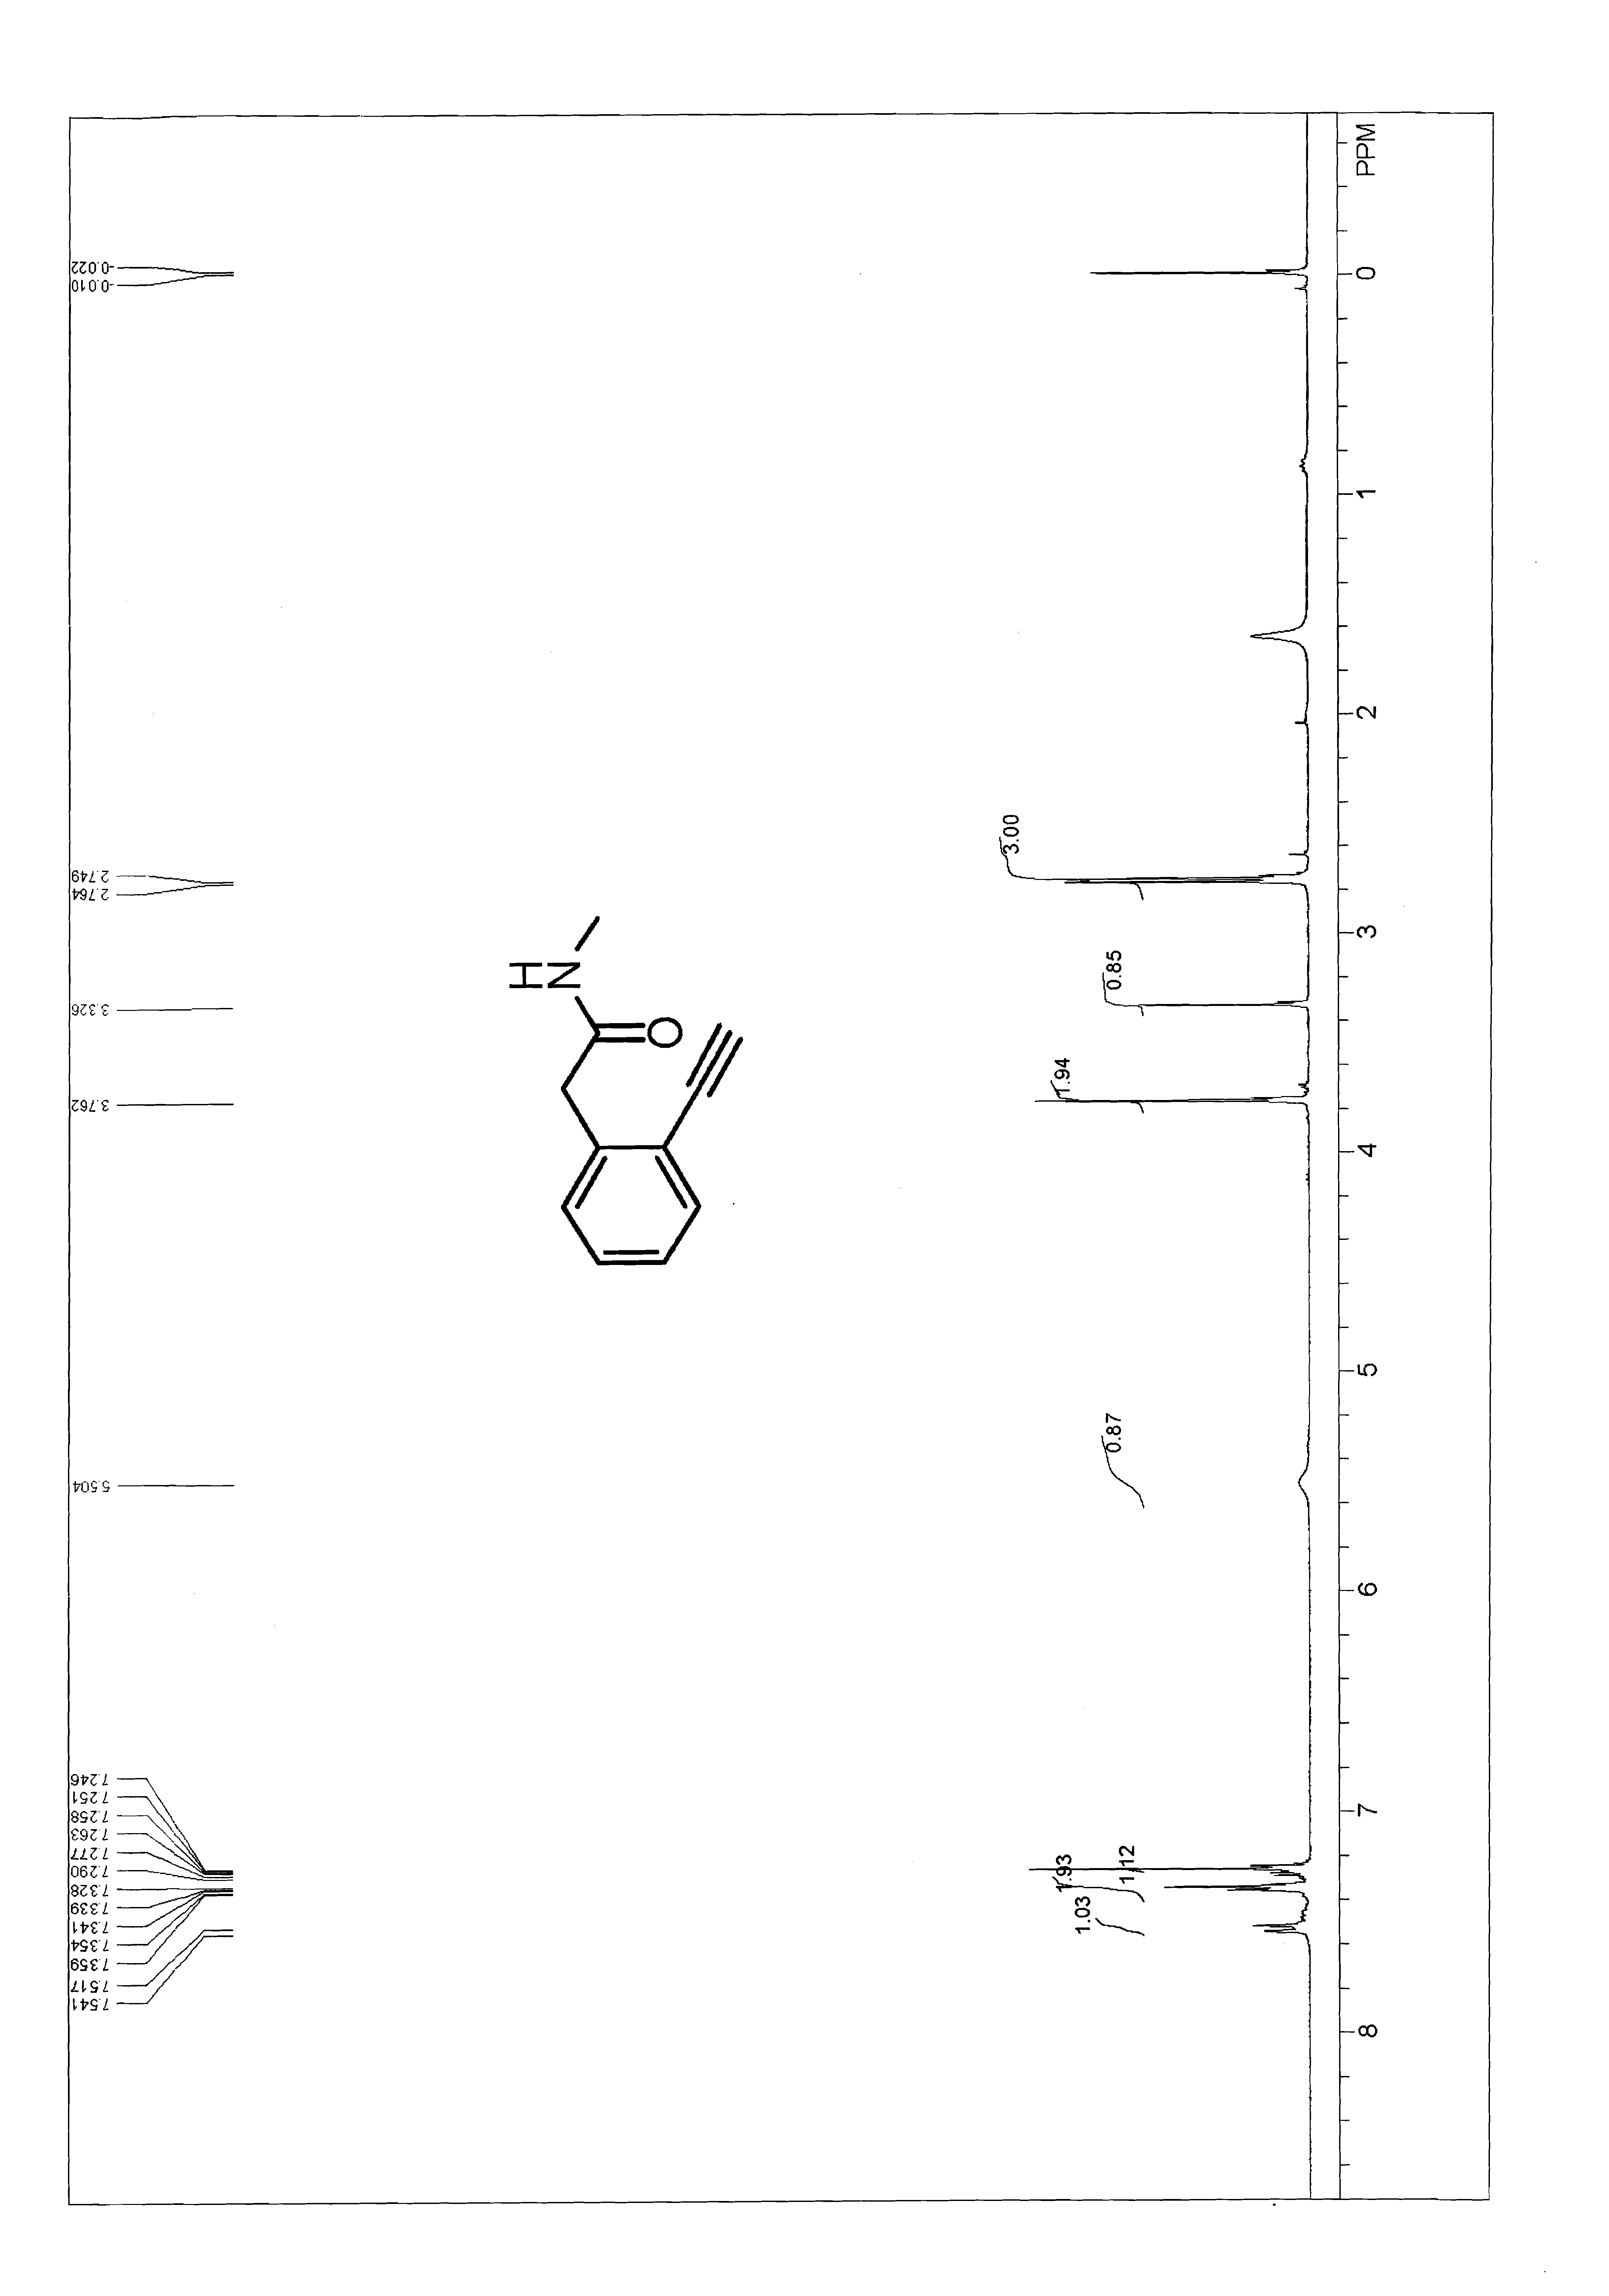
**

**
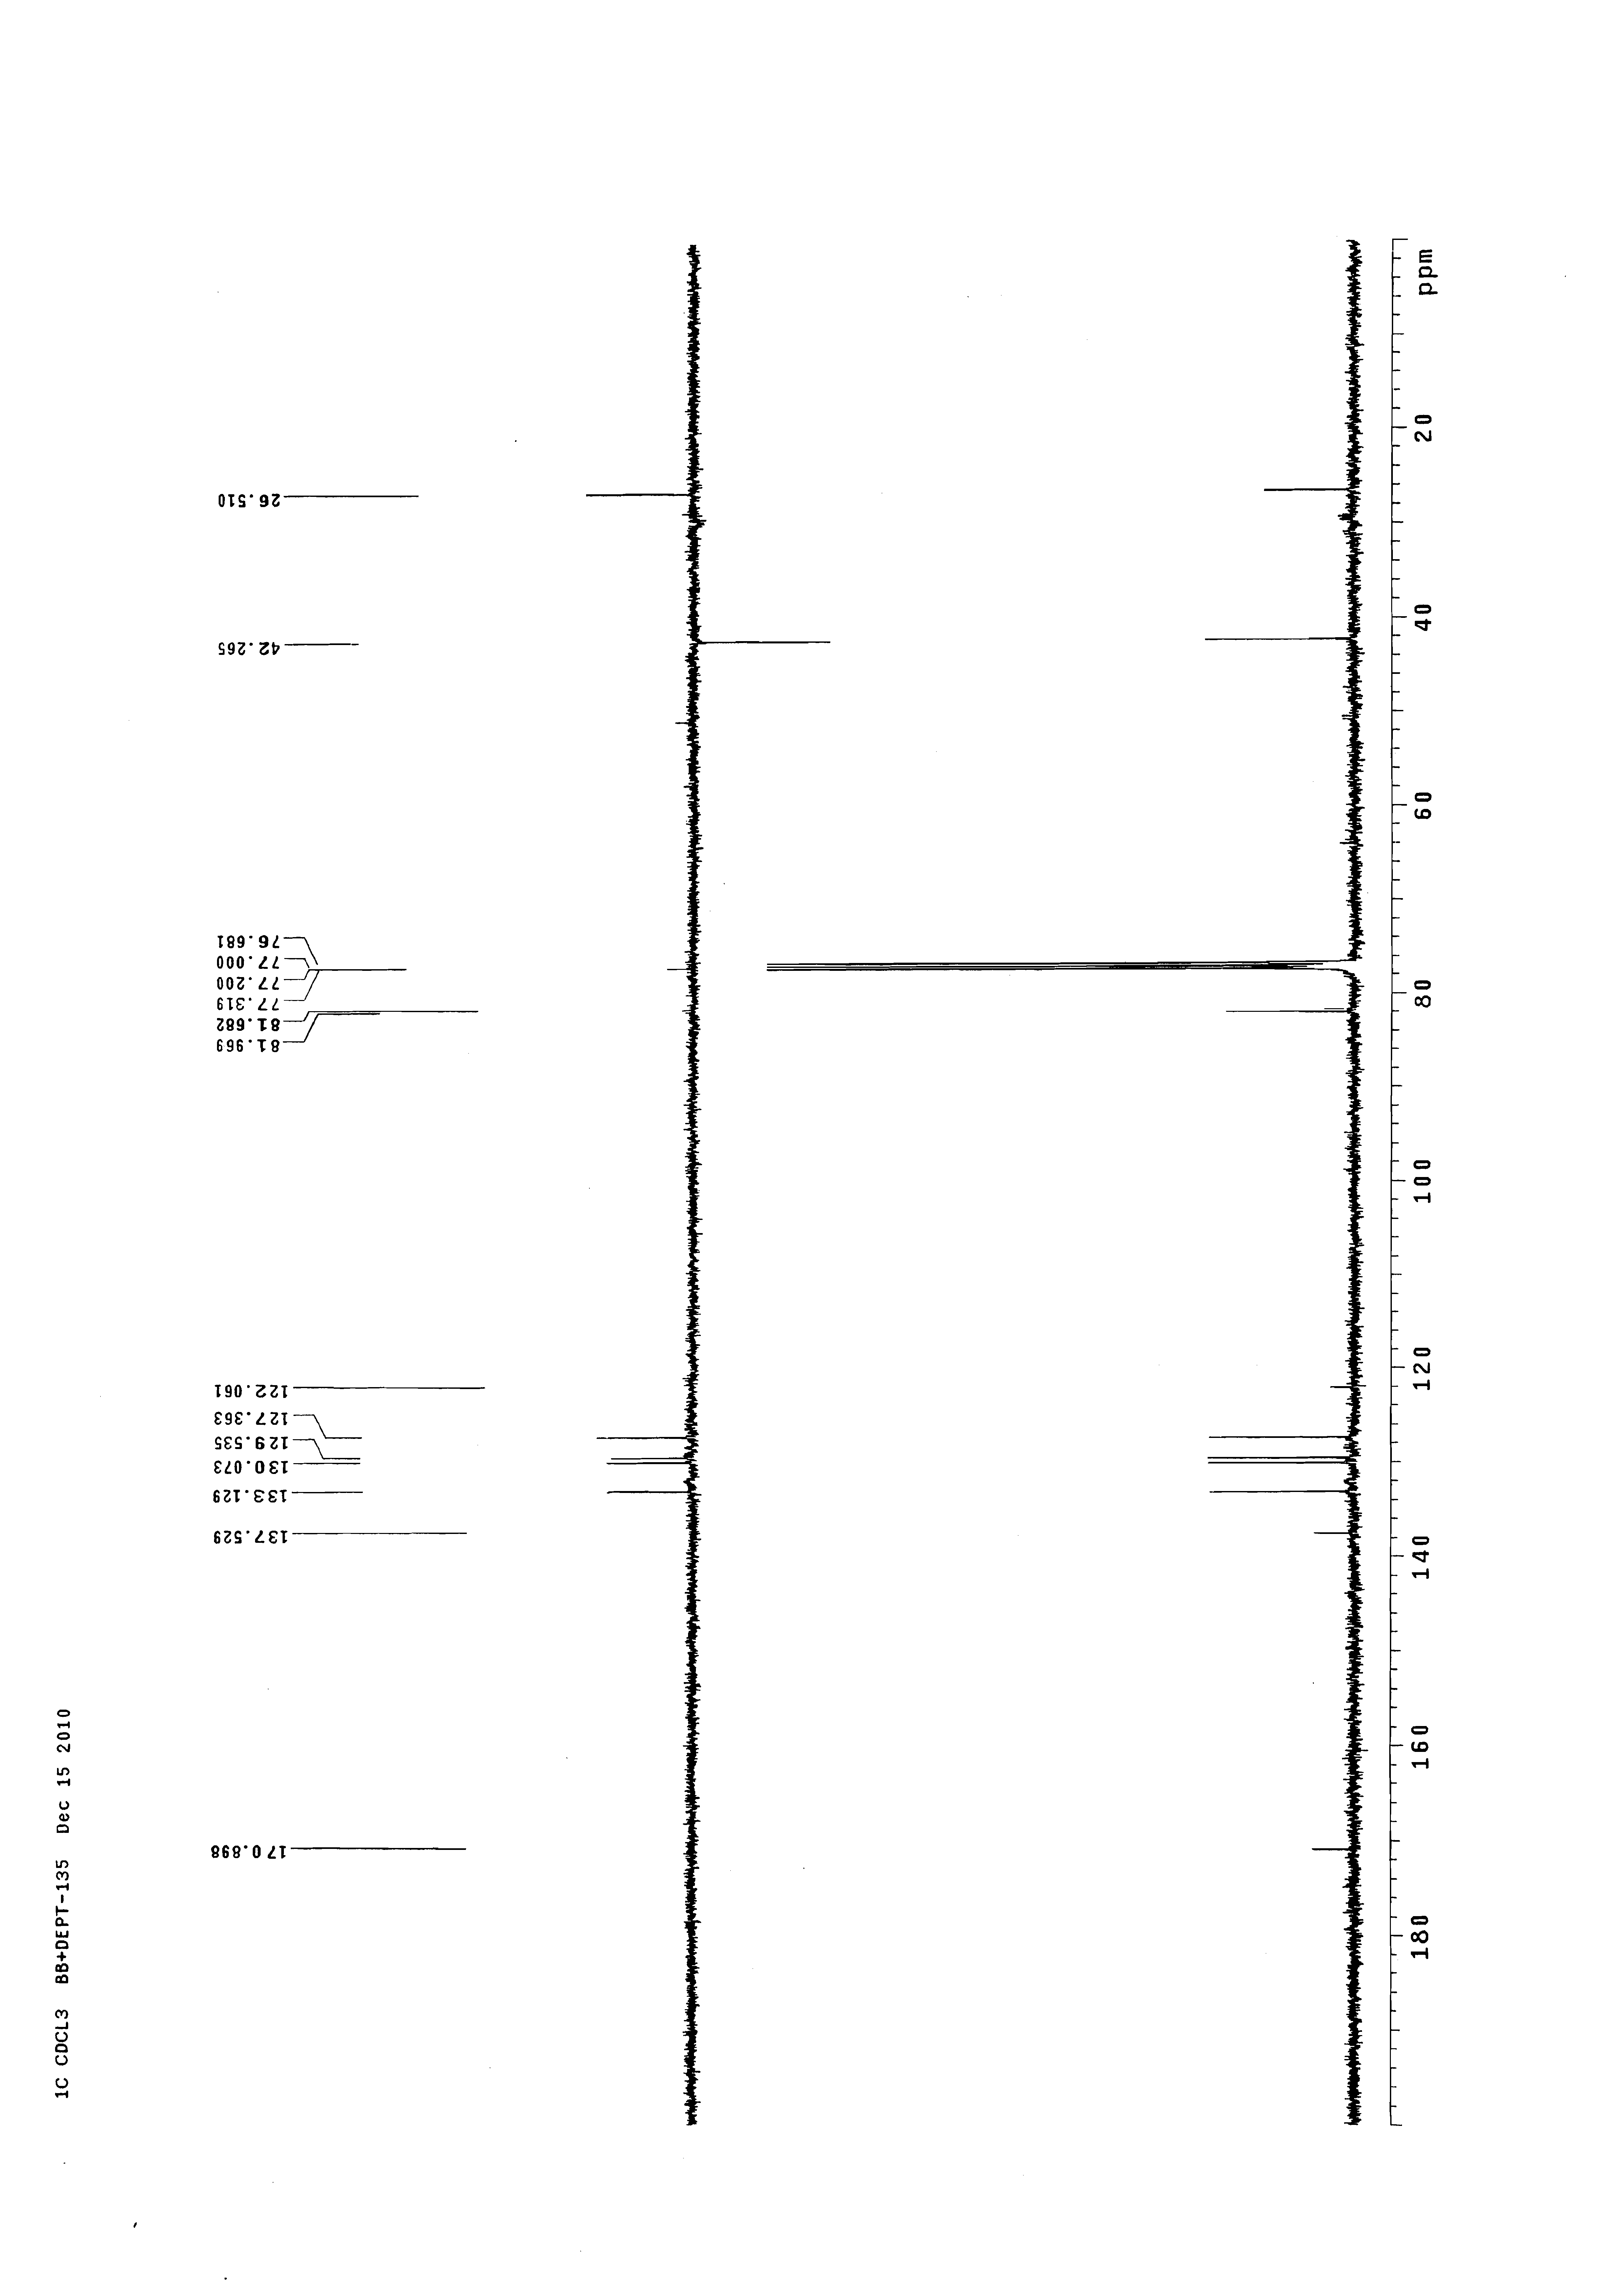
**

**2-(2-ethynylphenyl)-*N,N*-dimethylacetamide (1d)**

**
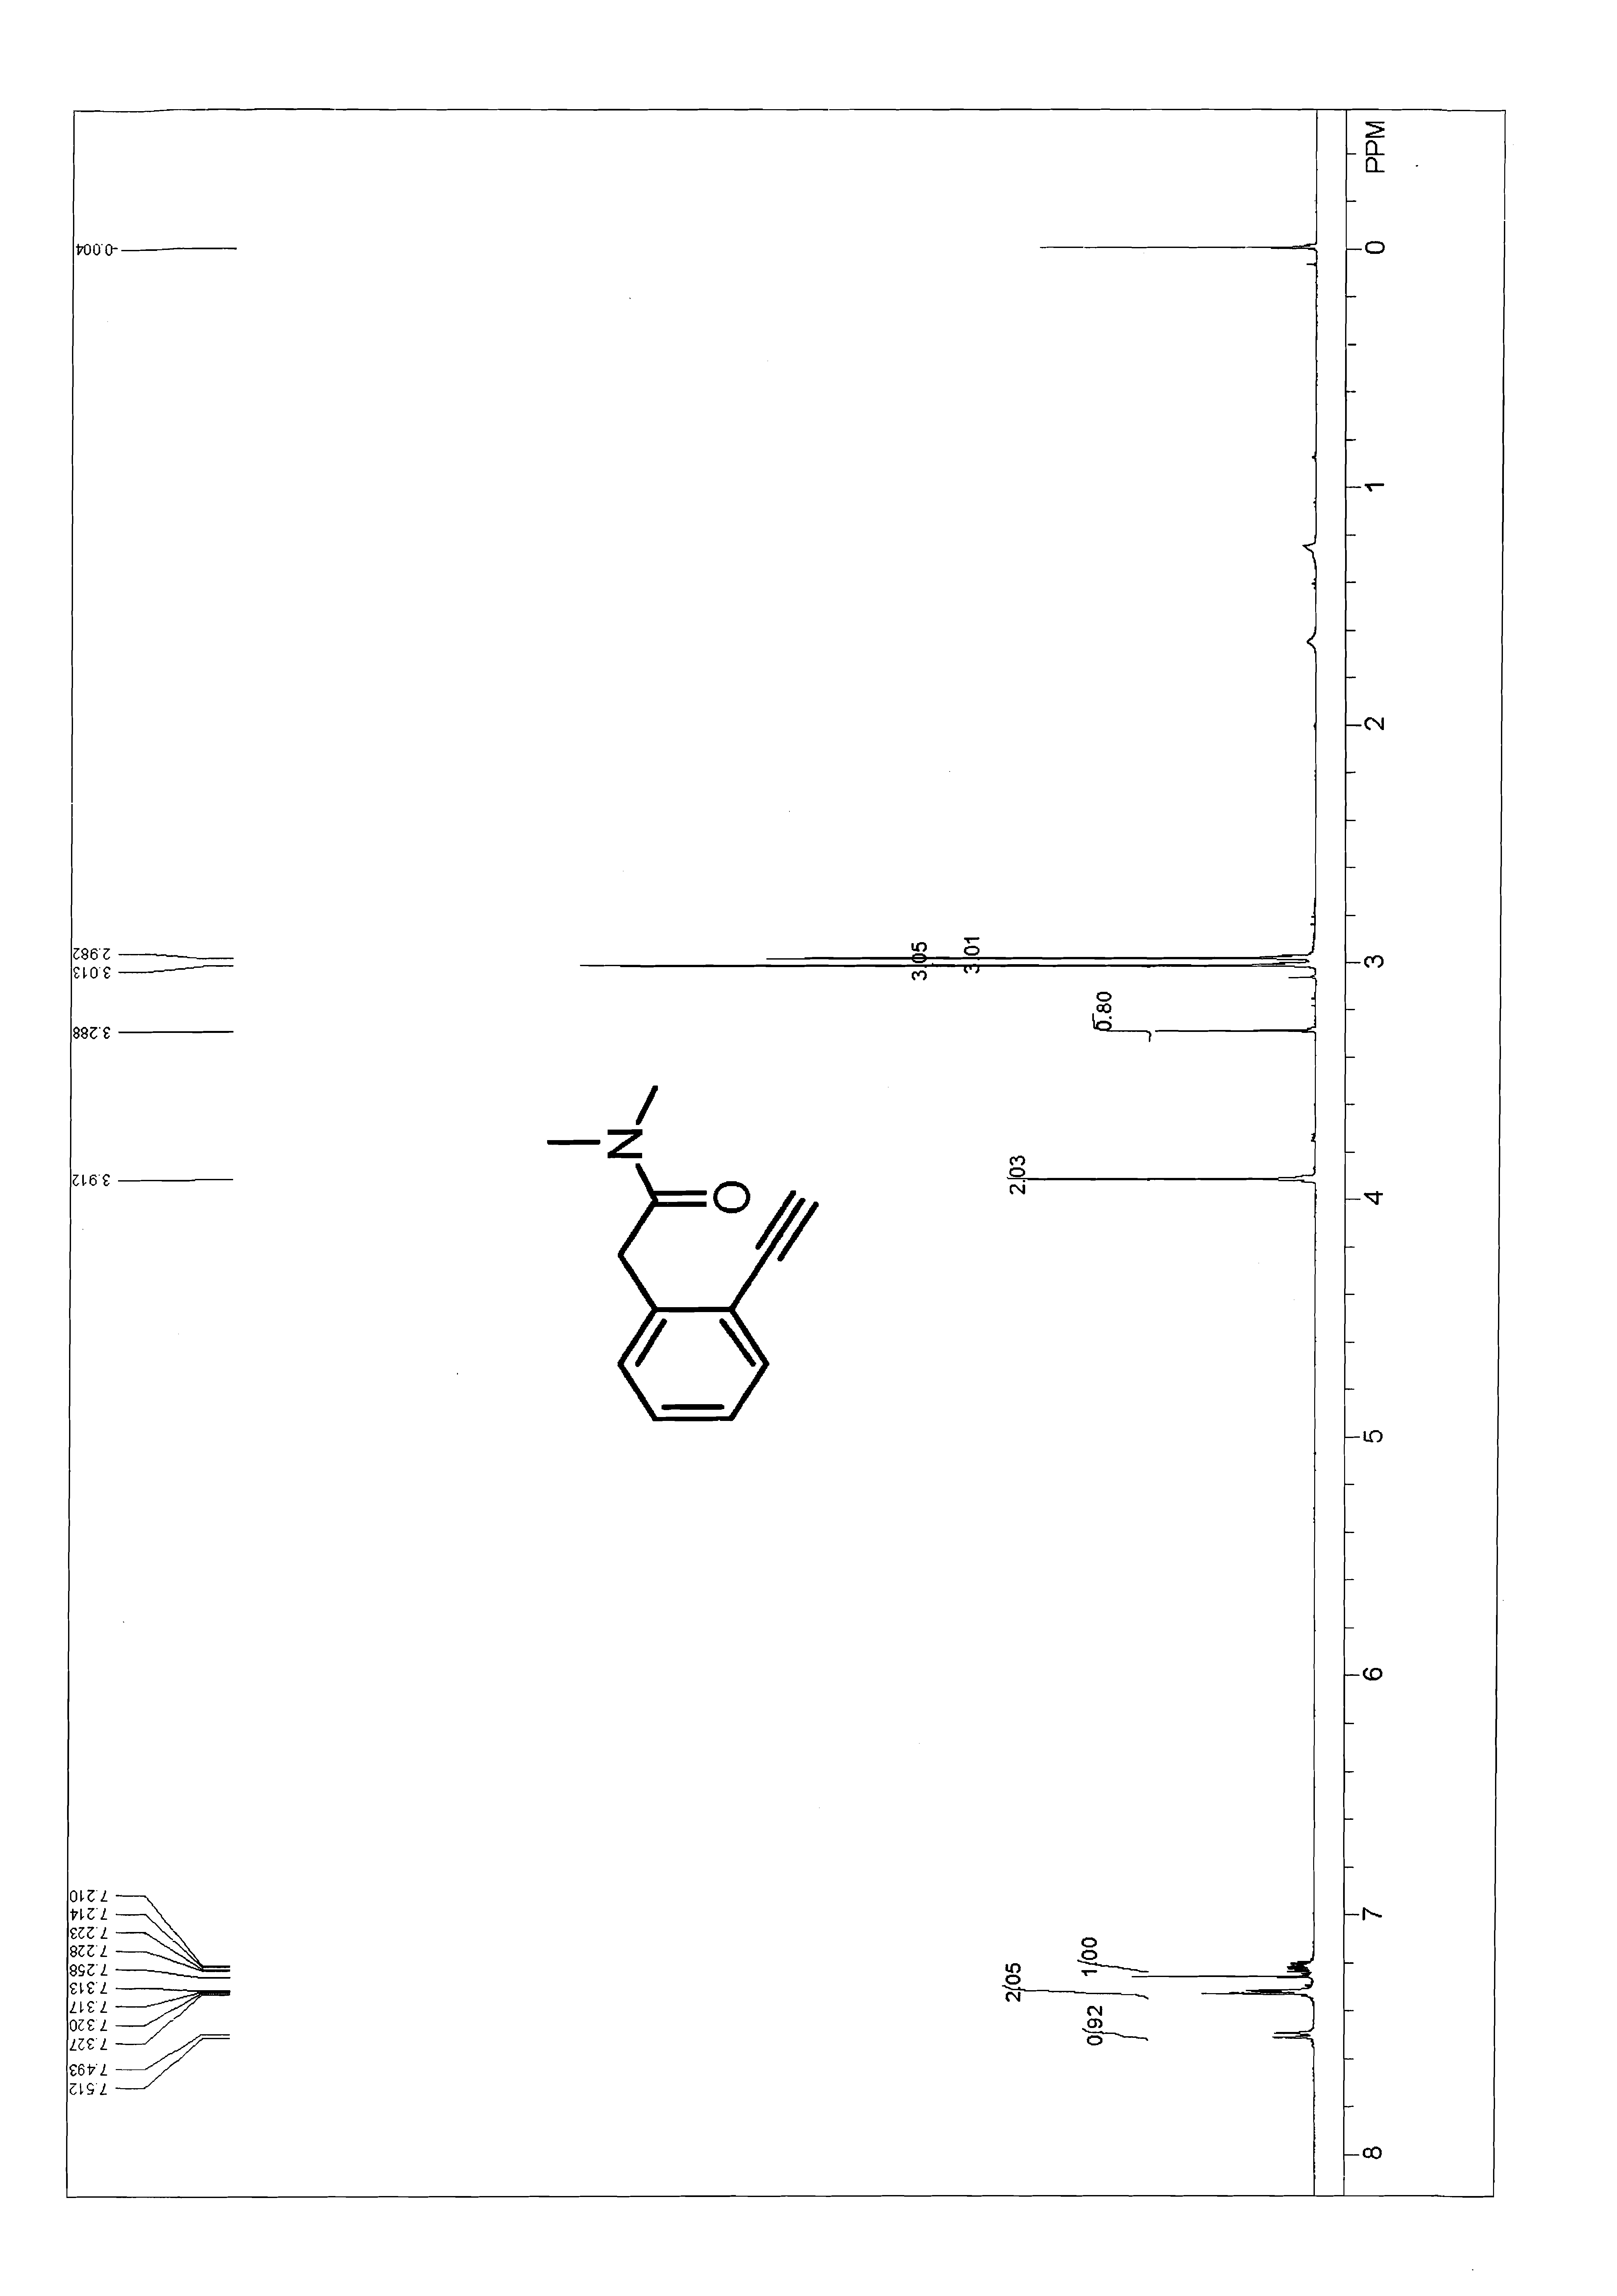
**

**
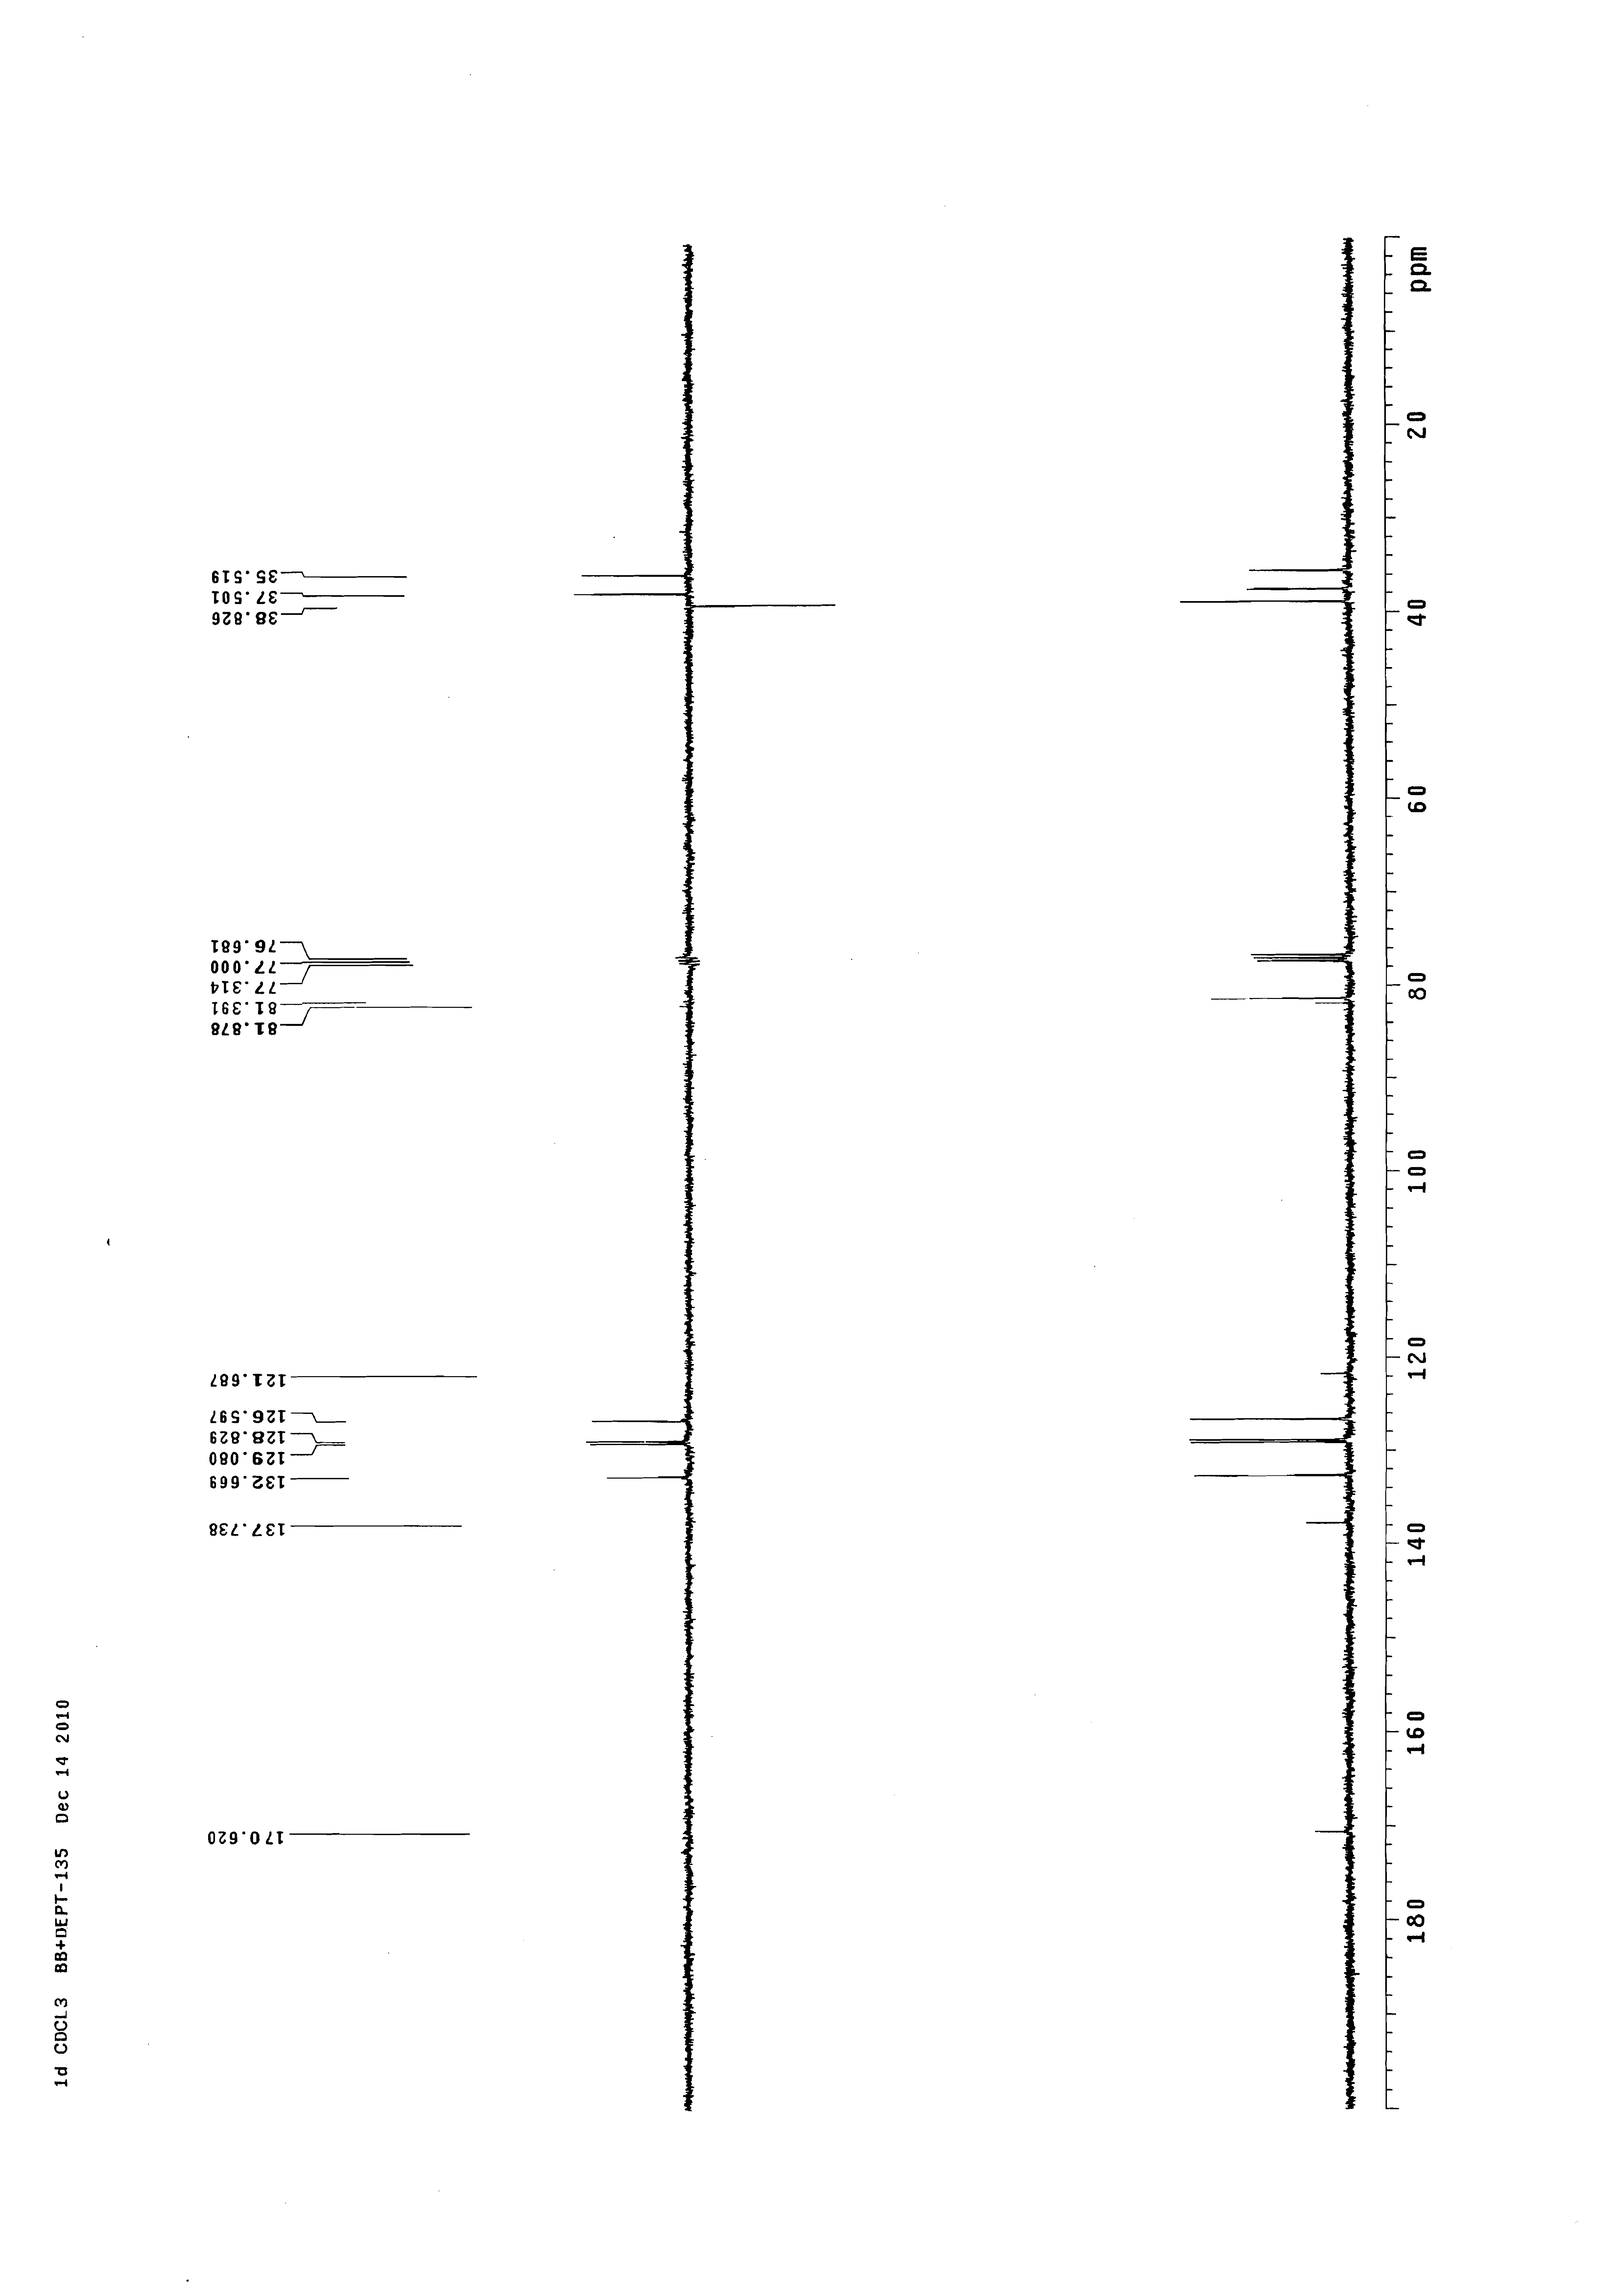
**

**2-(2-ethynylphenyl)-*N*-phenylacetamide (1e)**


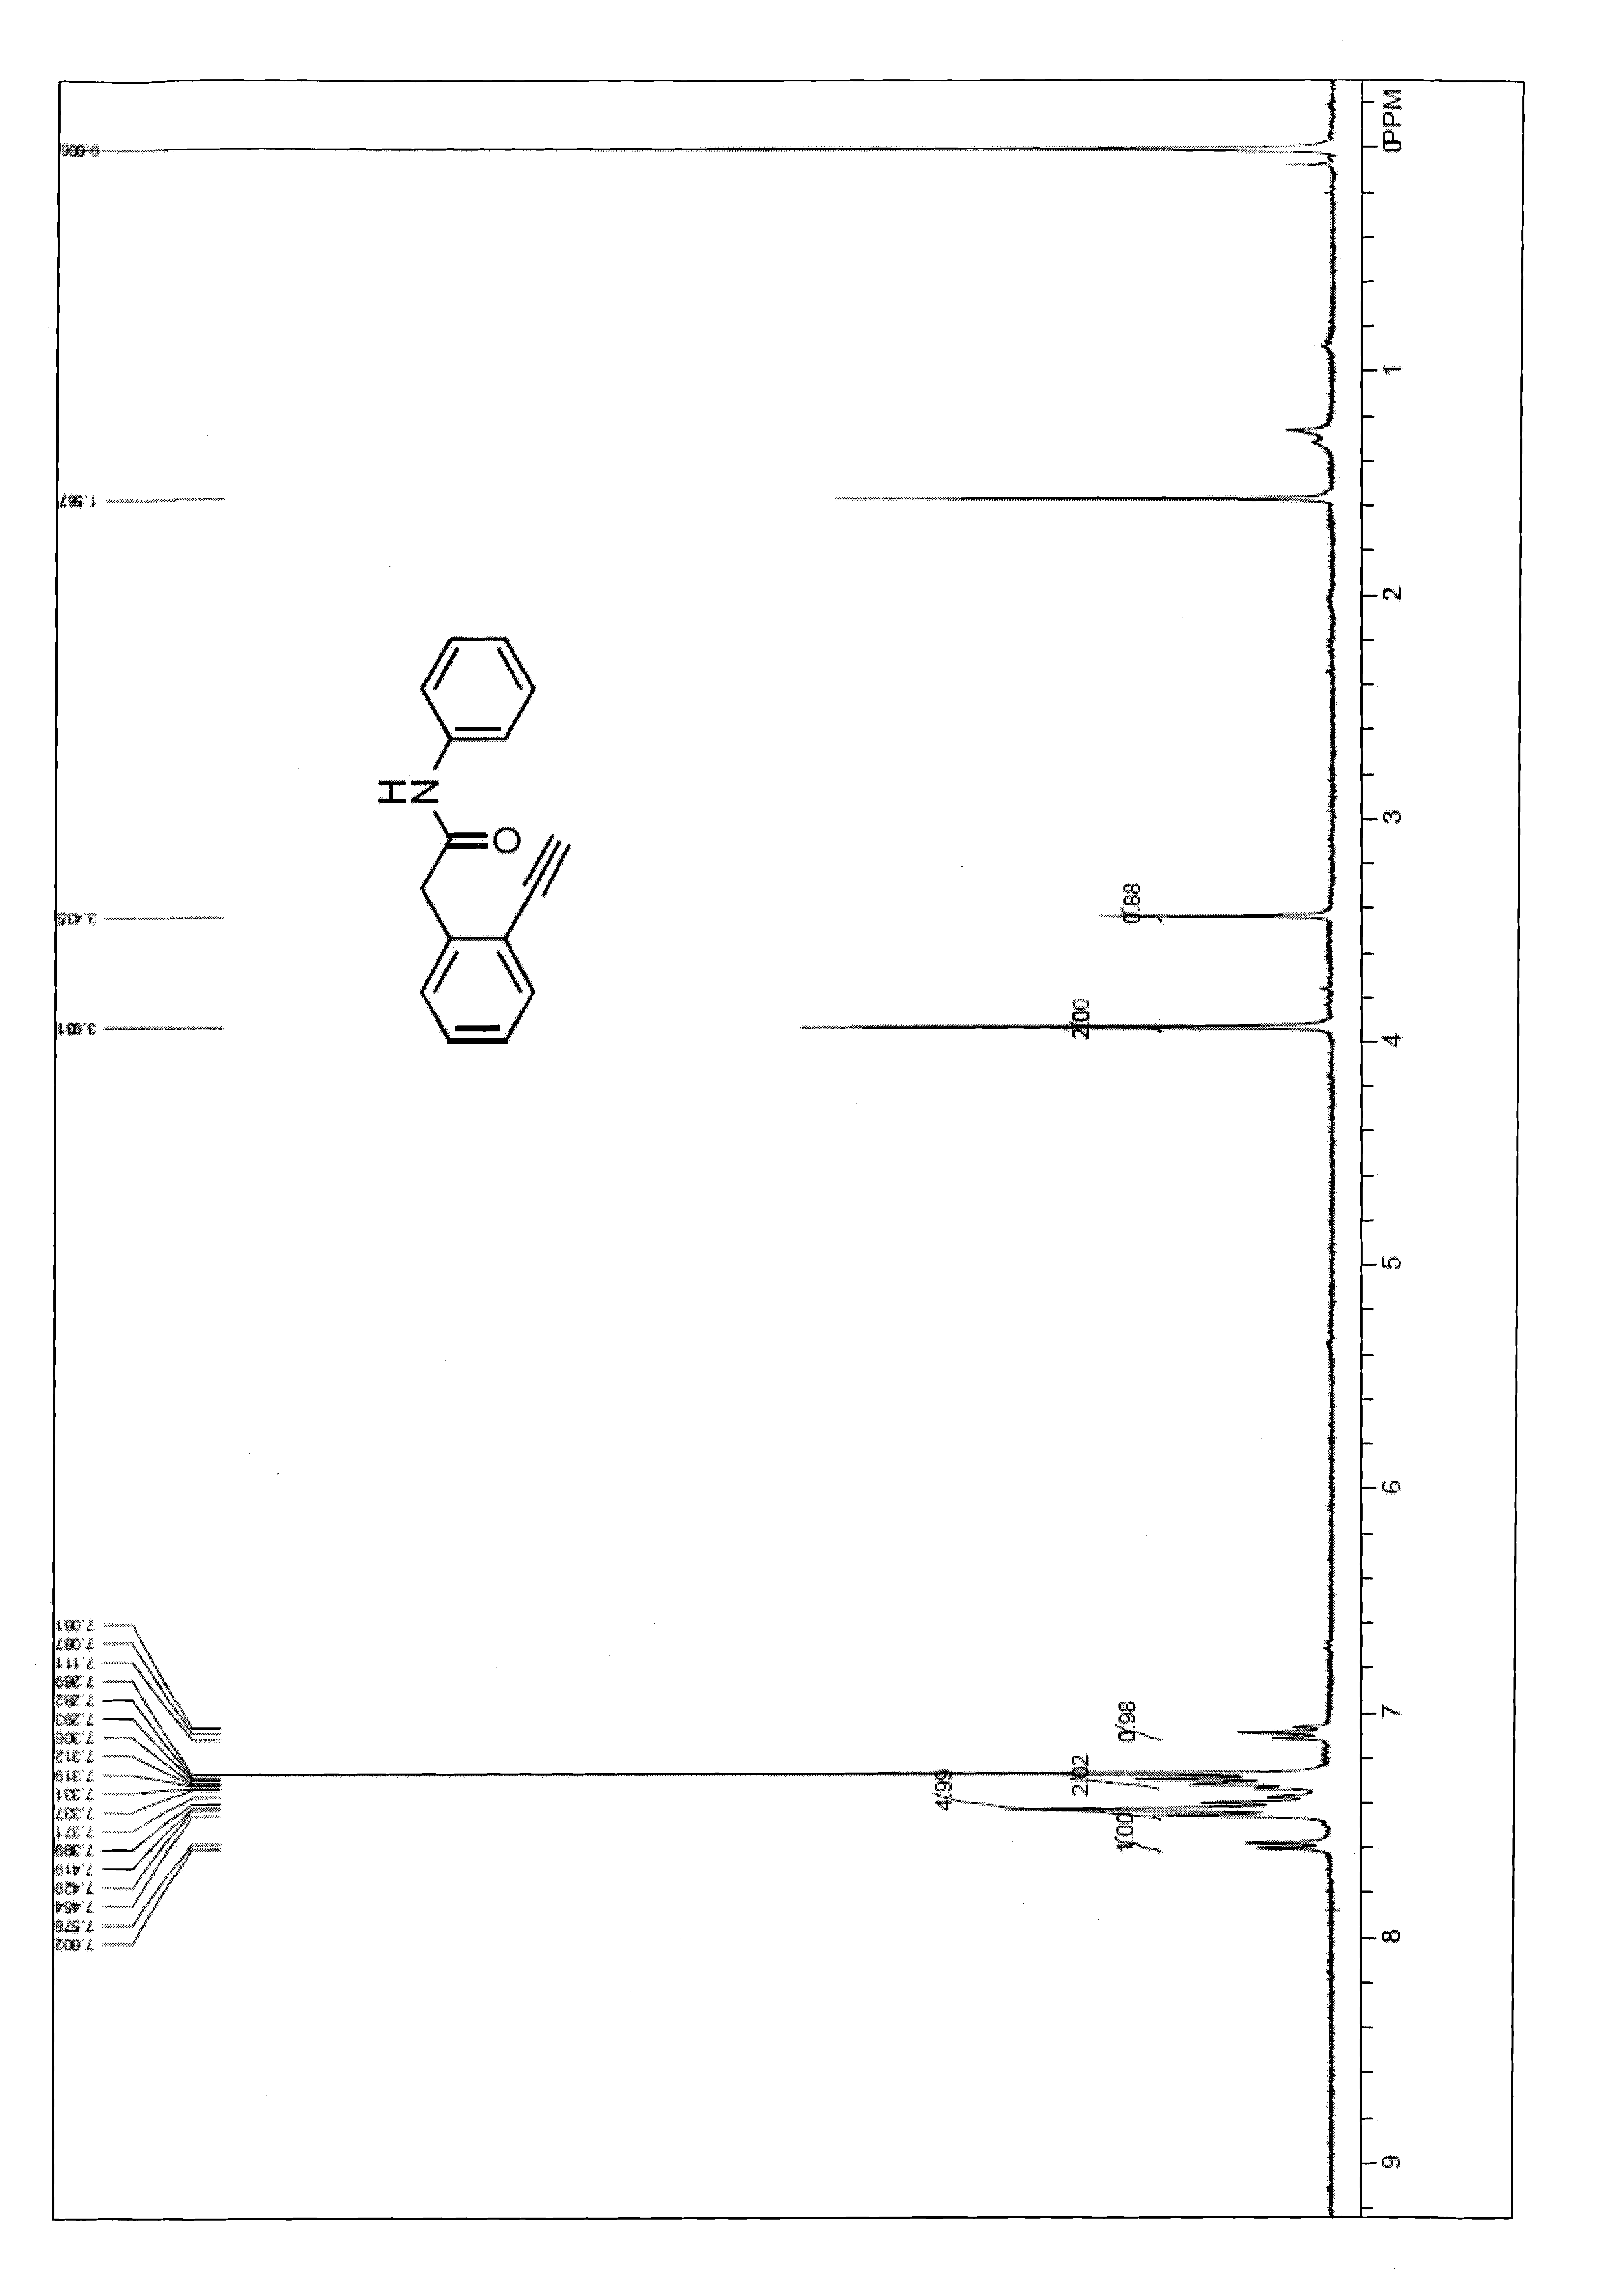


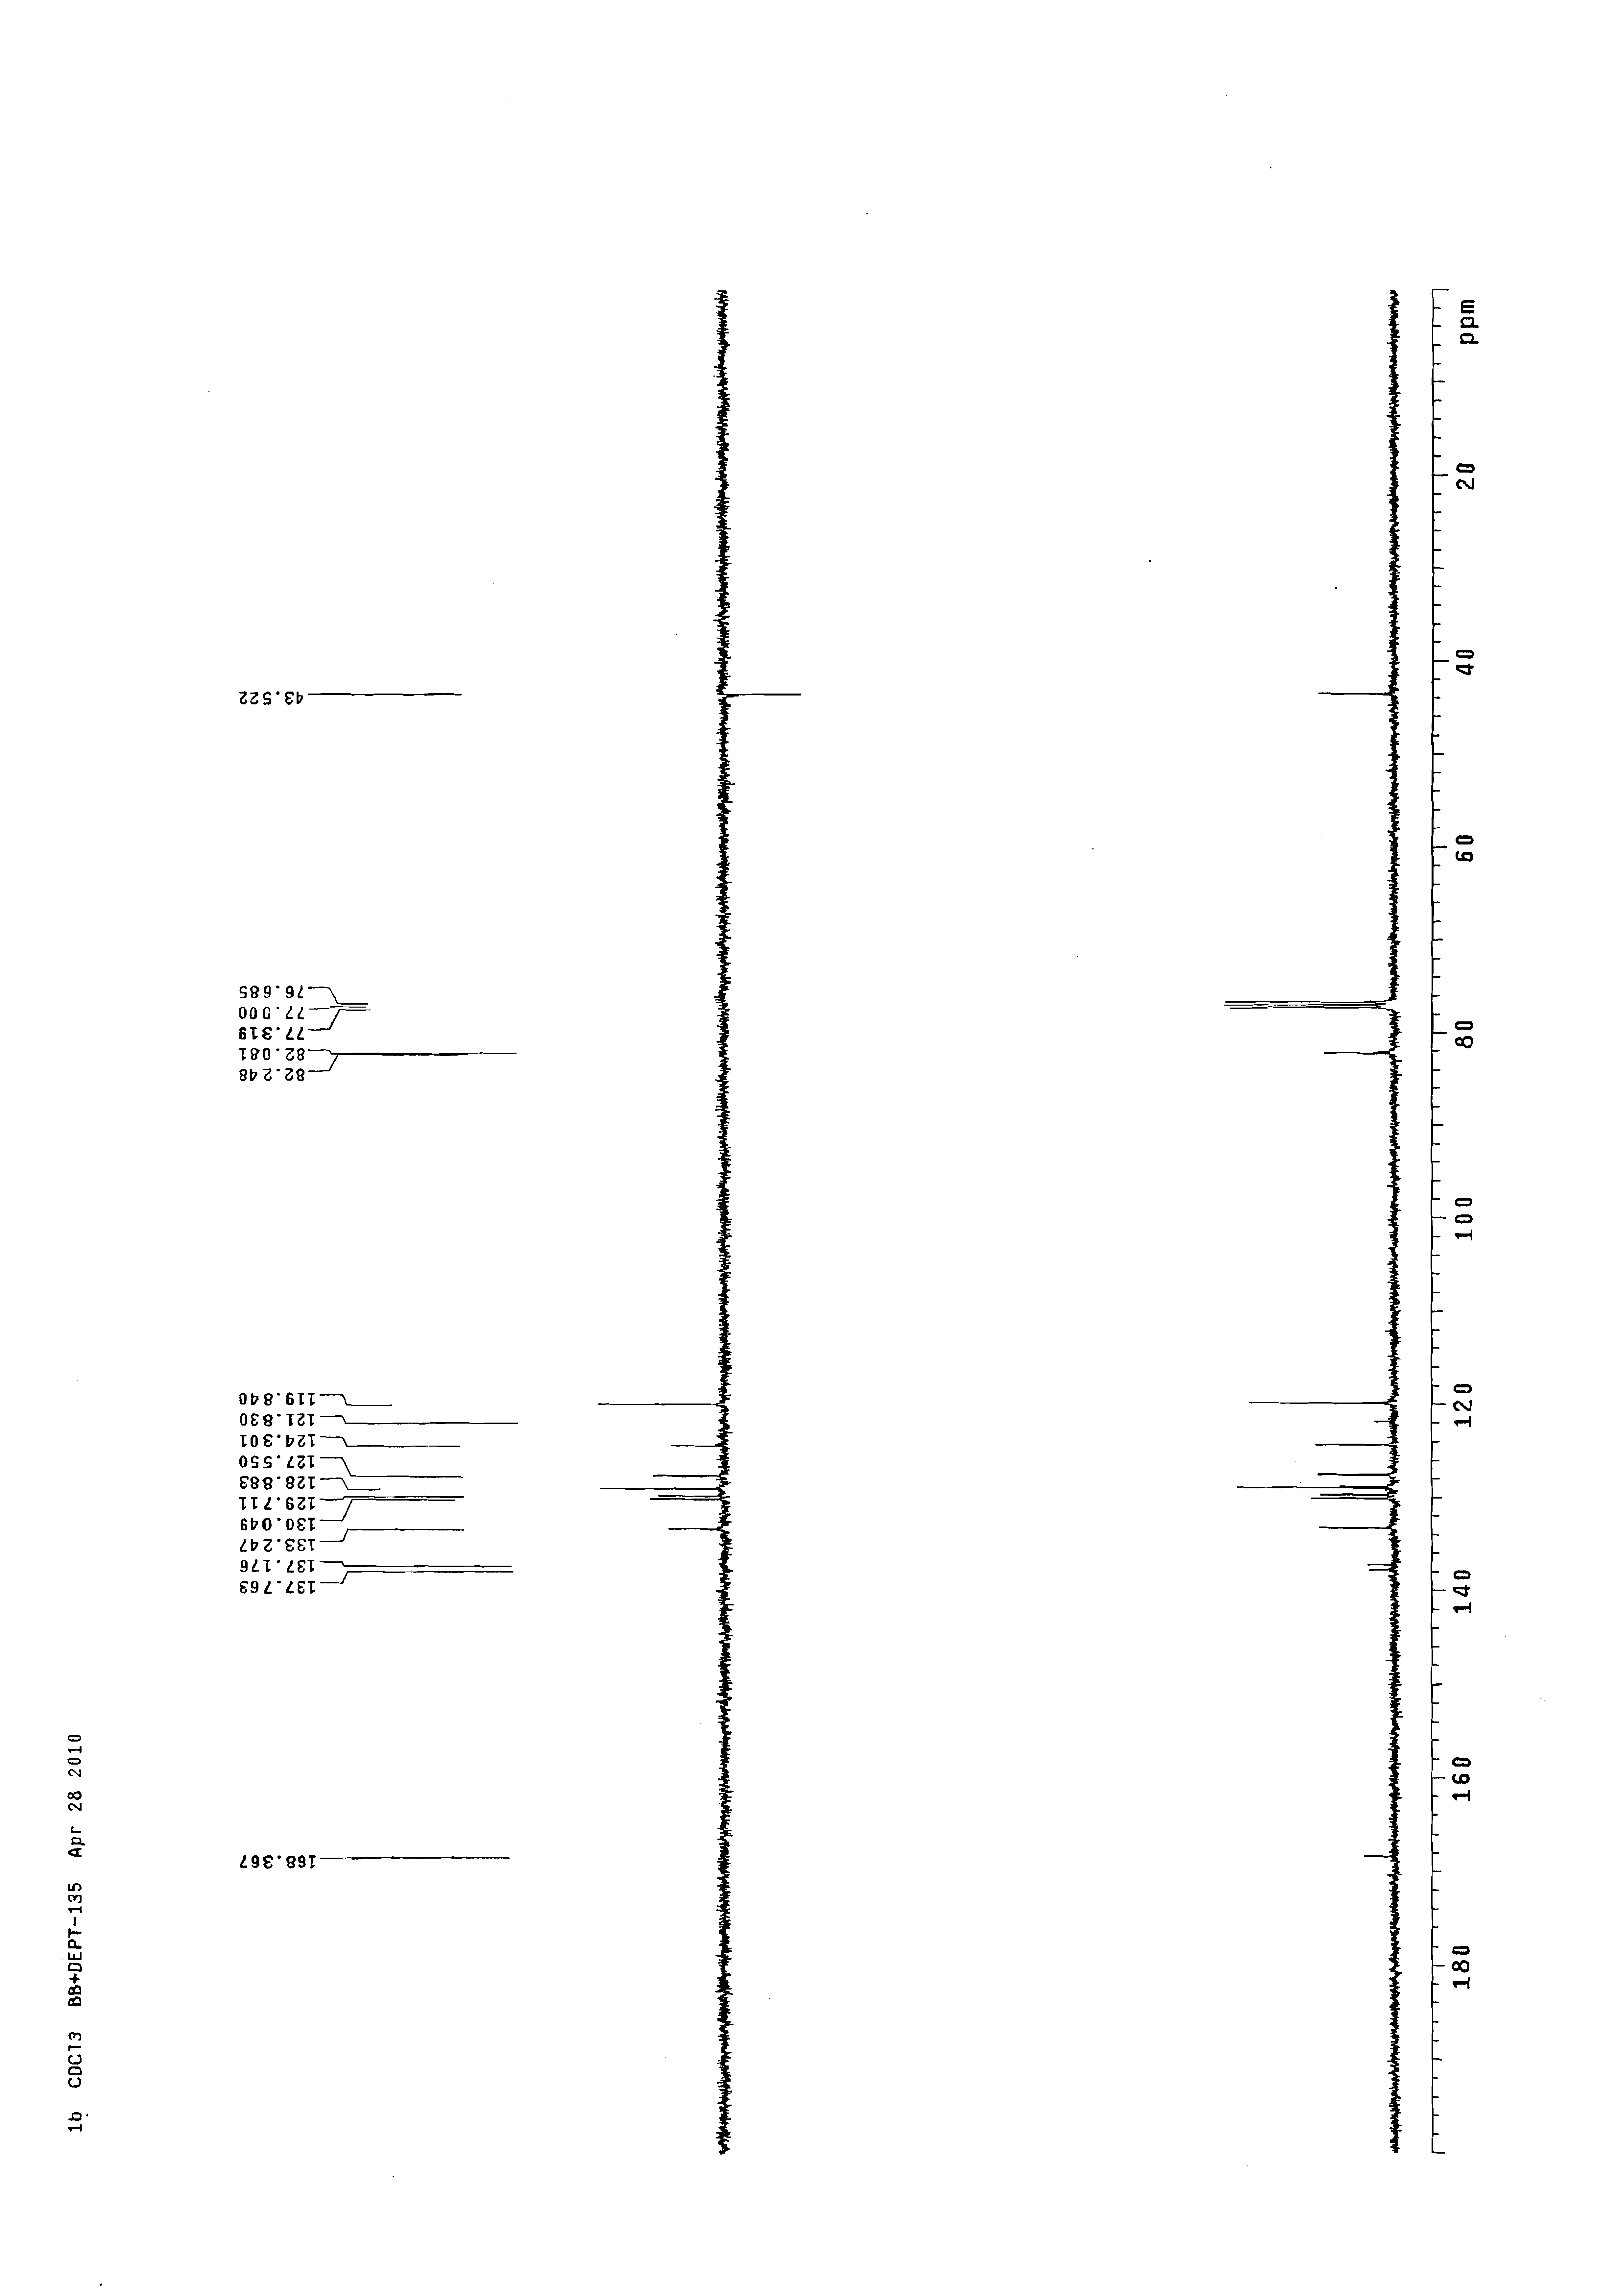


**2-(2-ethynylphenyl)-*N*-(4-methoxyphenyl)acetamide (1f)**


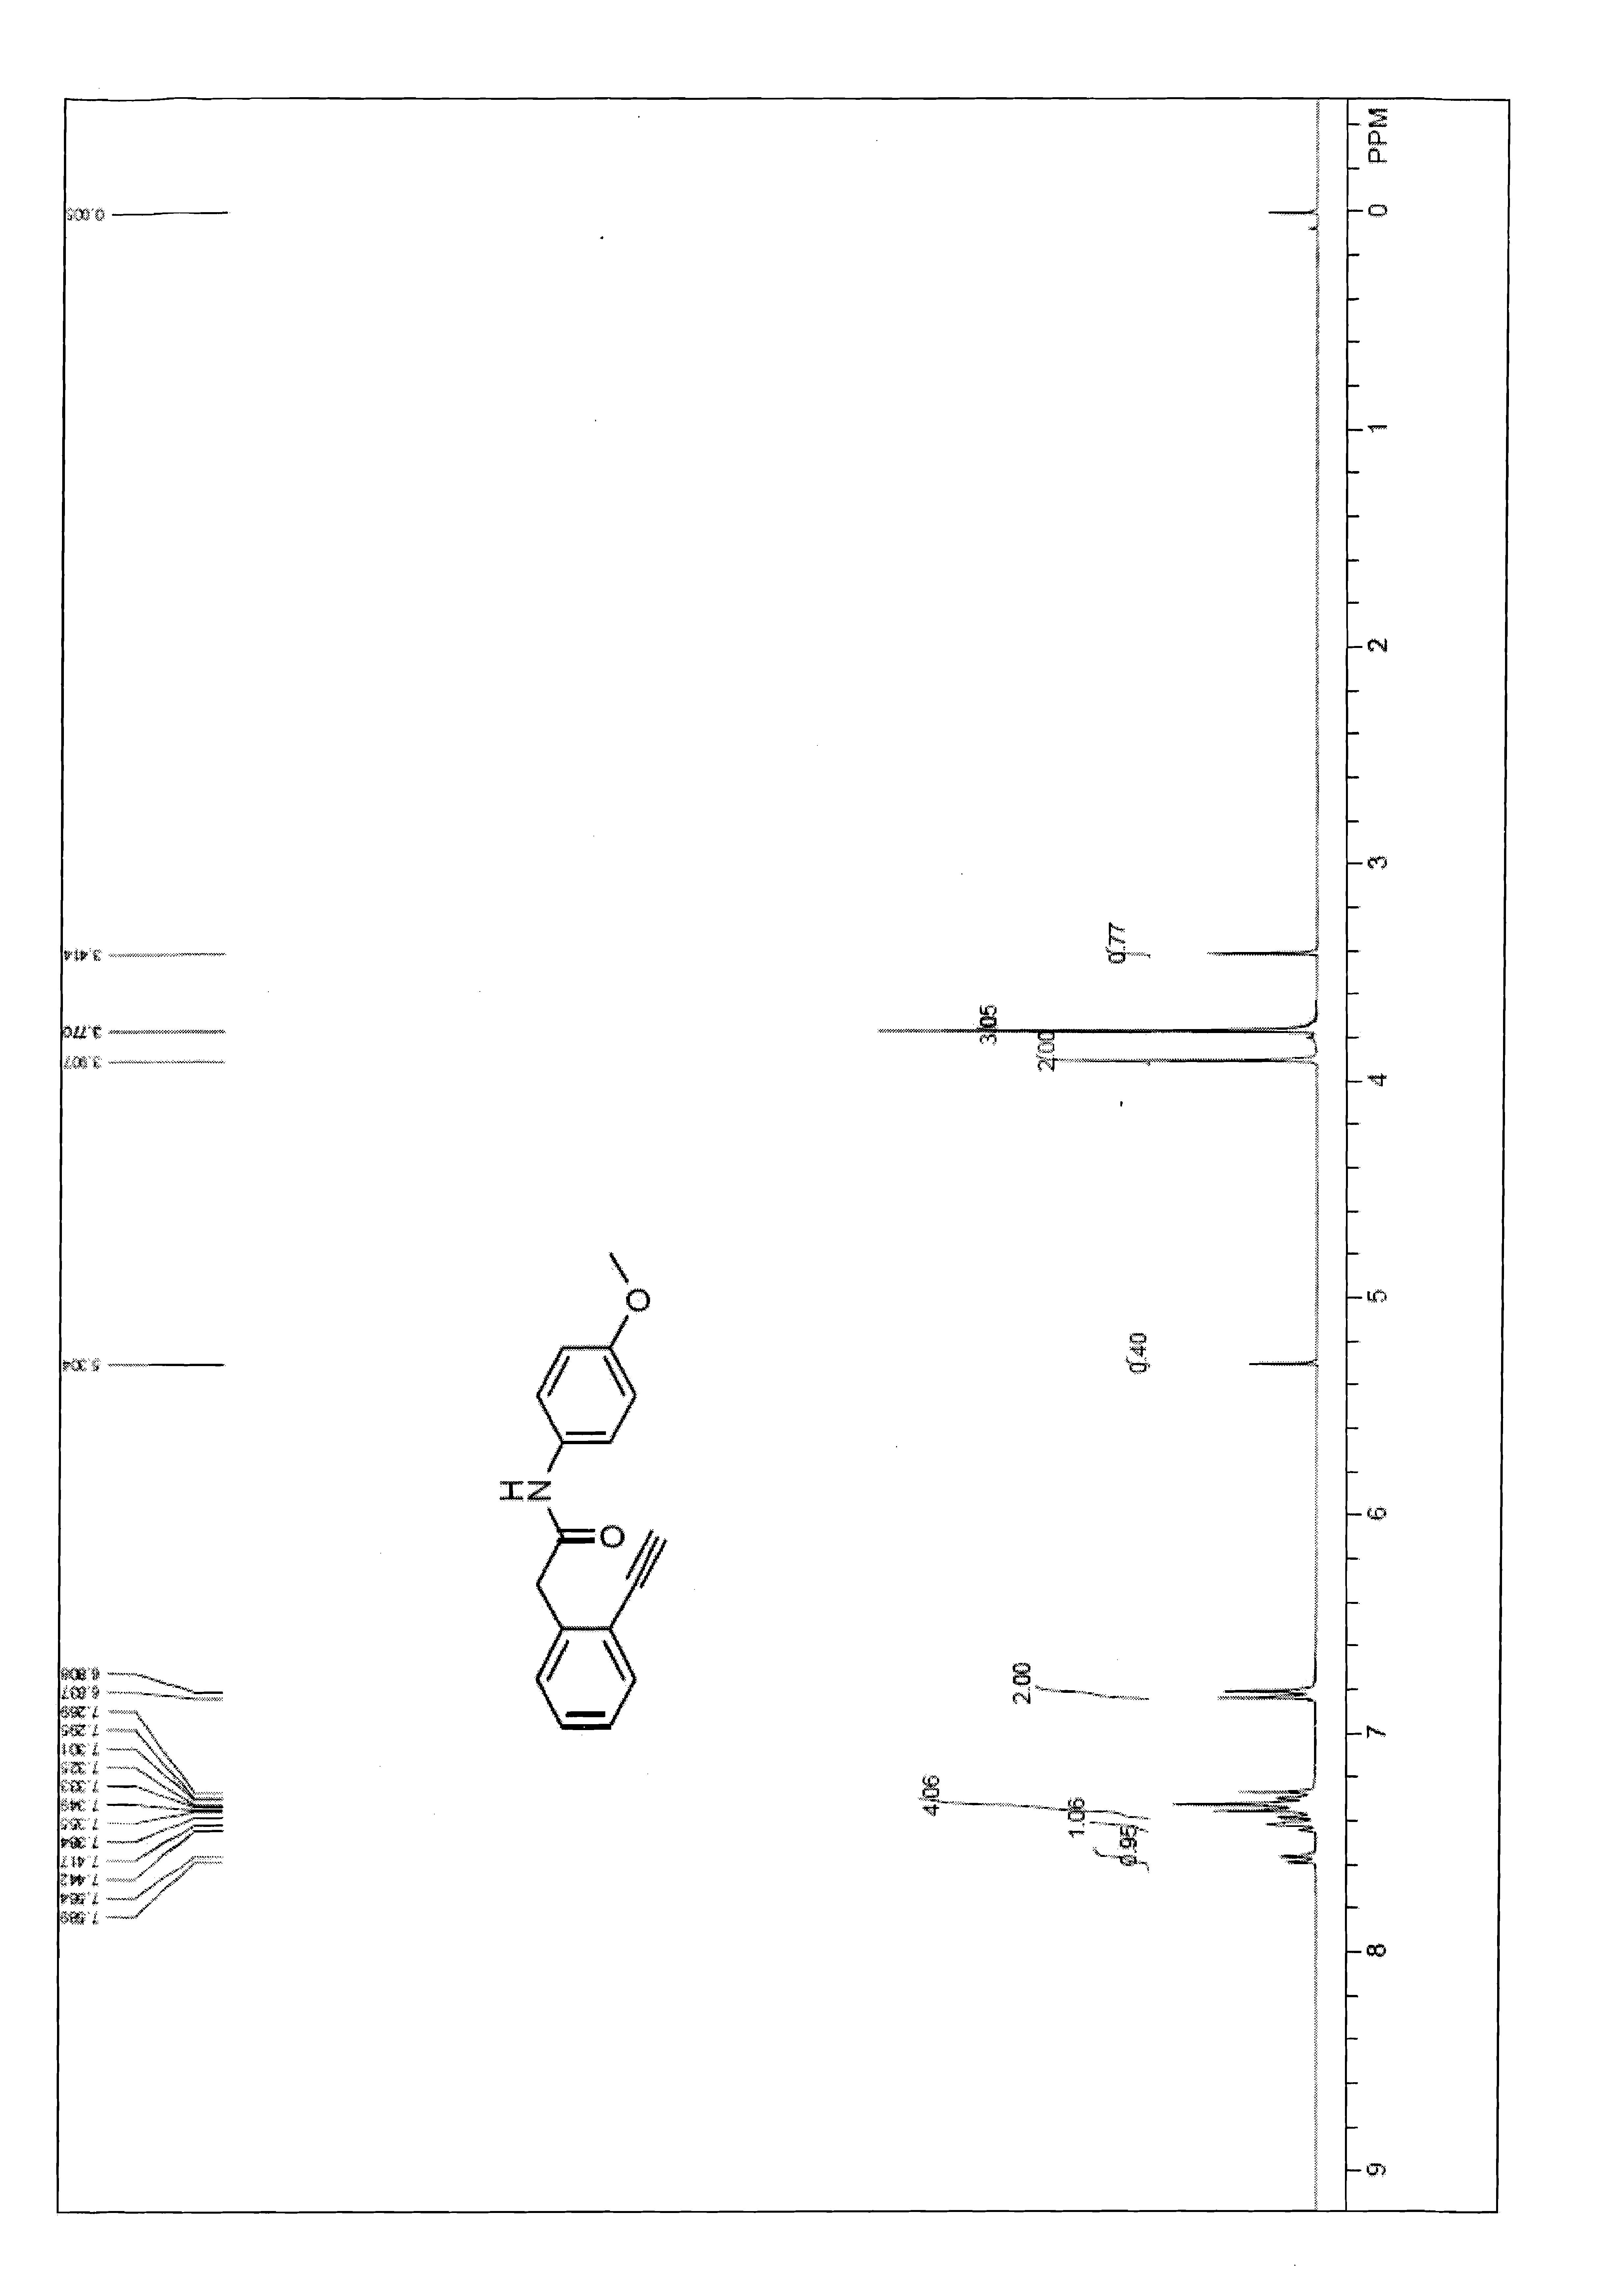


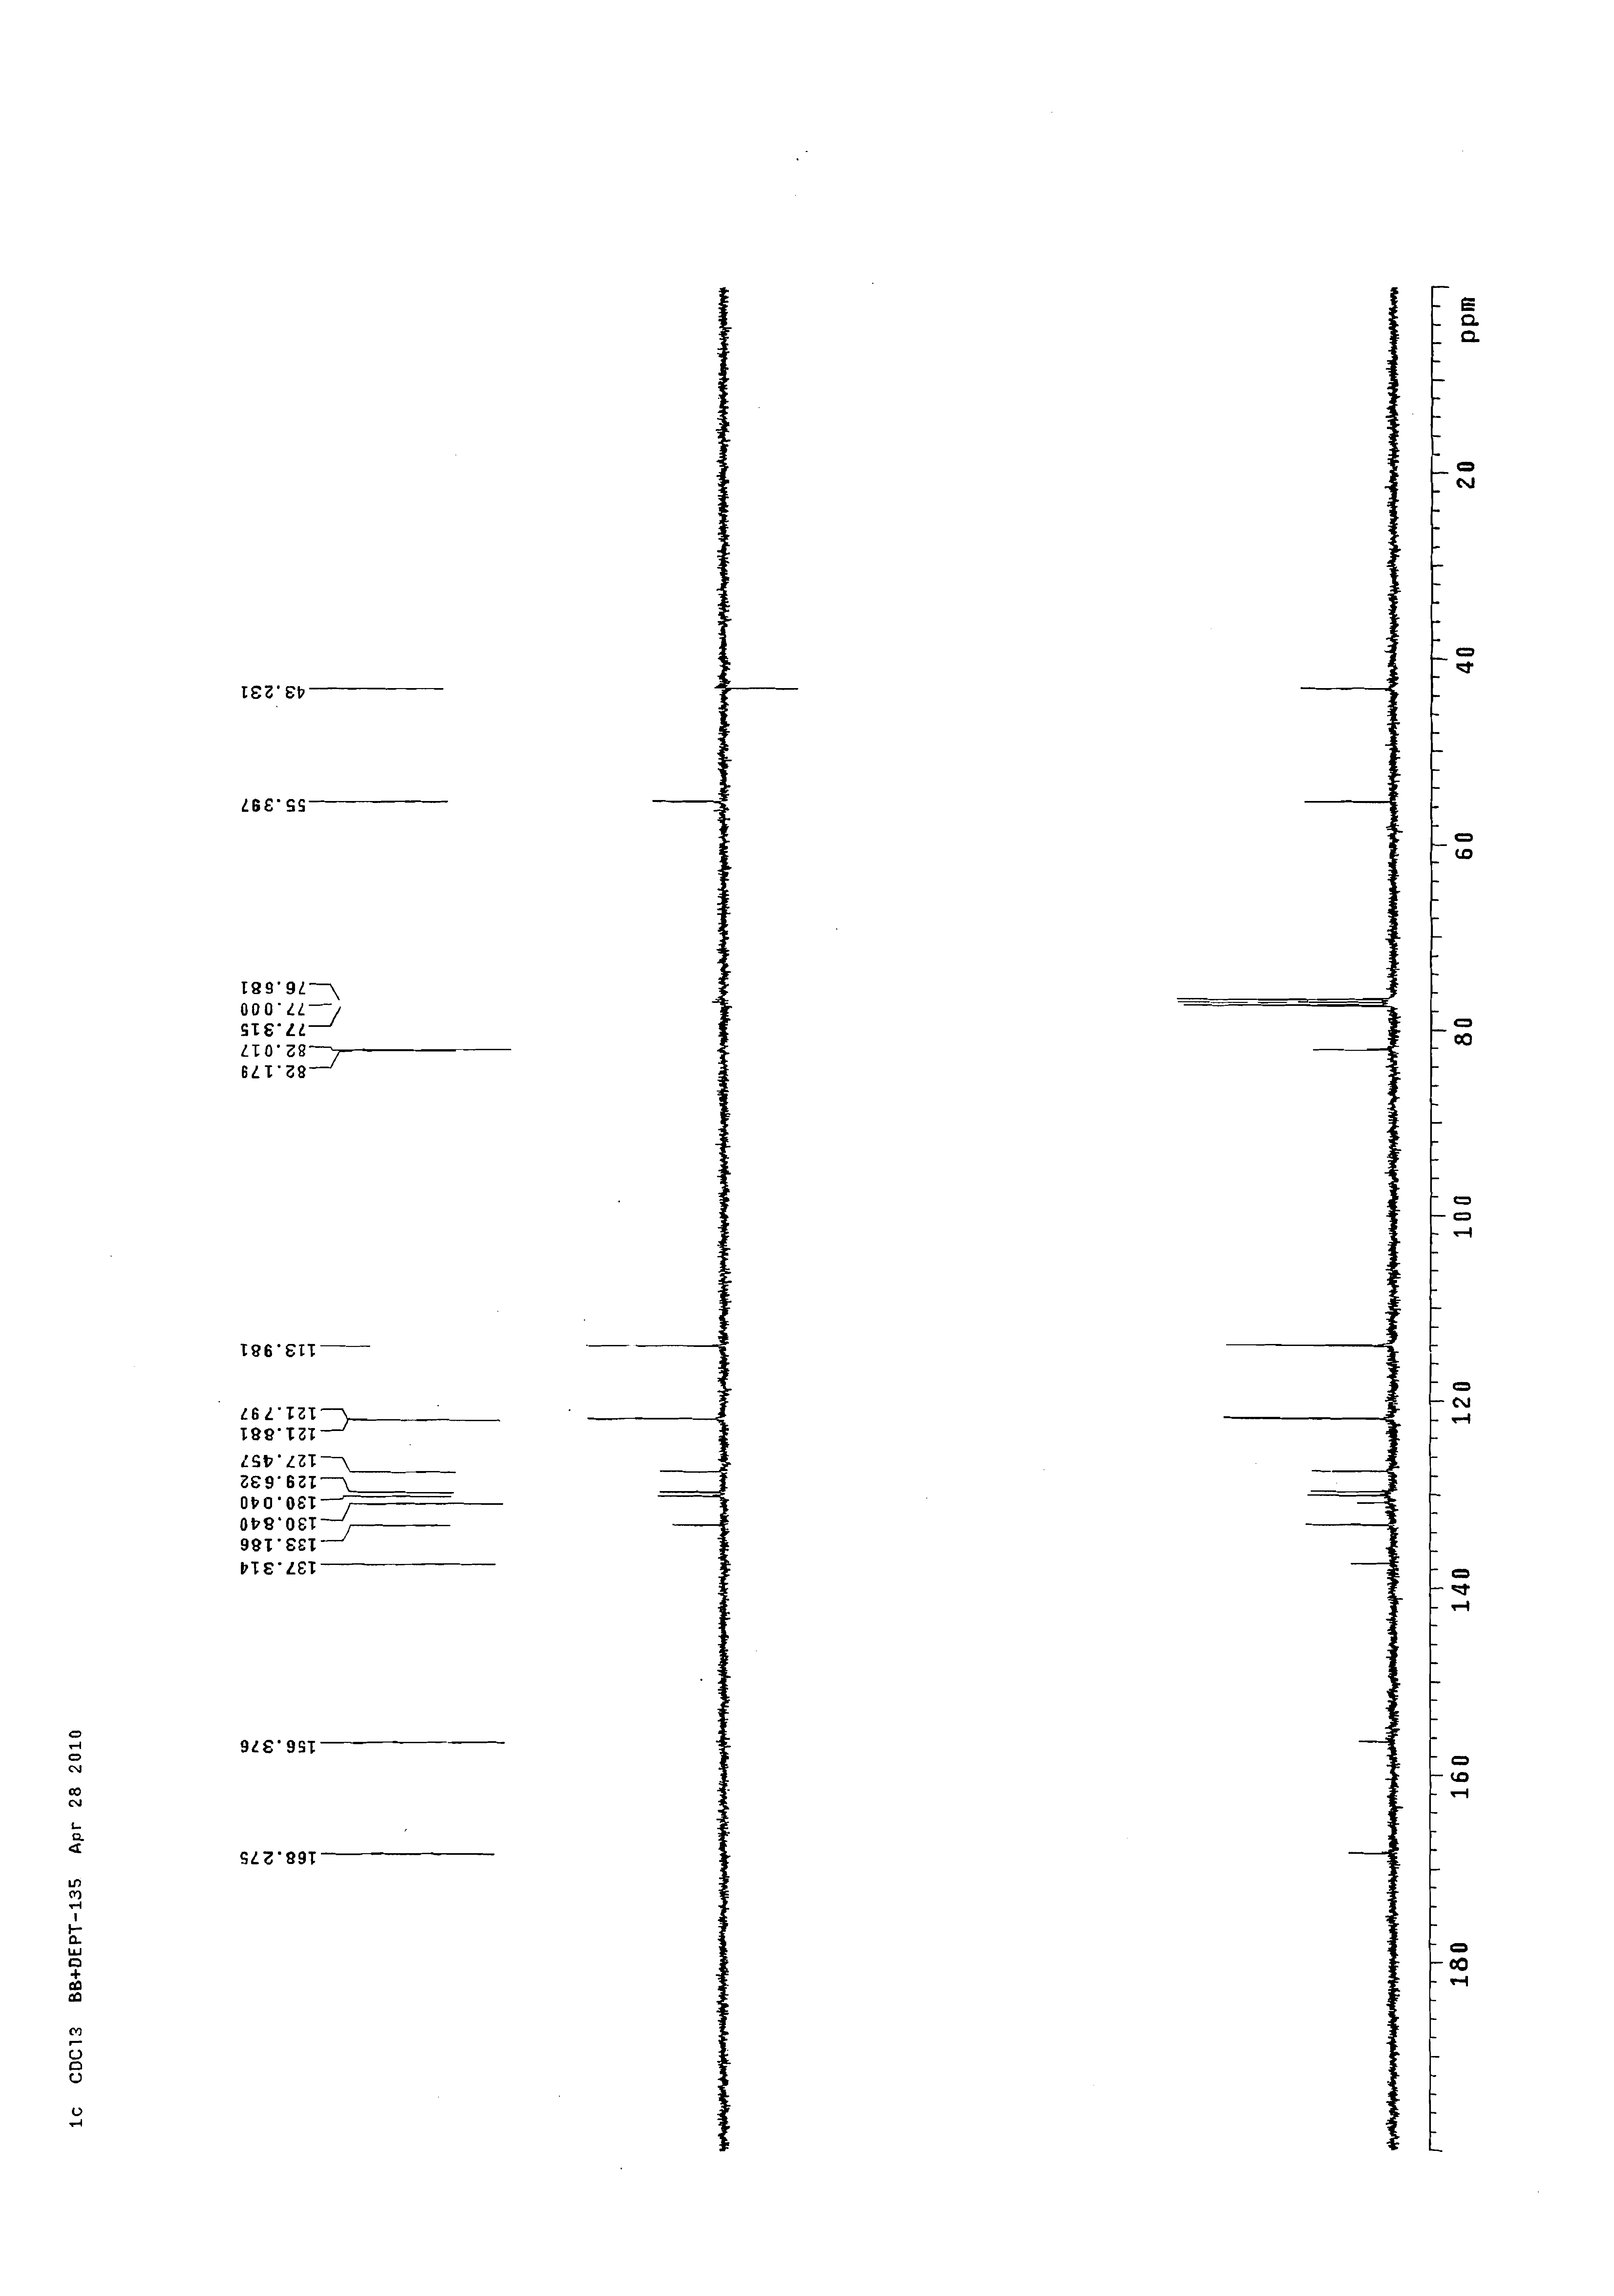


**2-(2-ethynylphenyl)-*N*-(4-(trifluoromethyl)phenyl)acetamide (1g)**


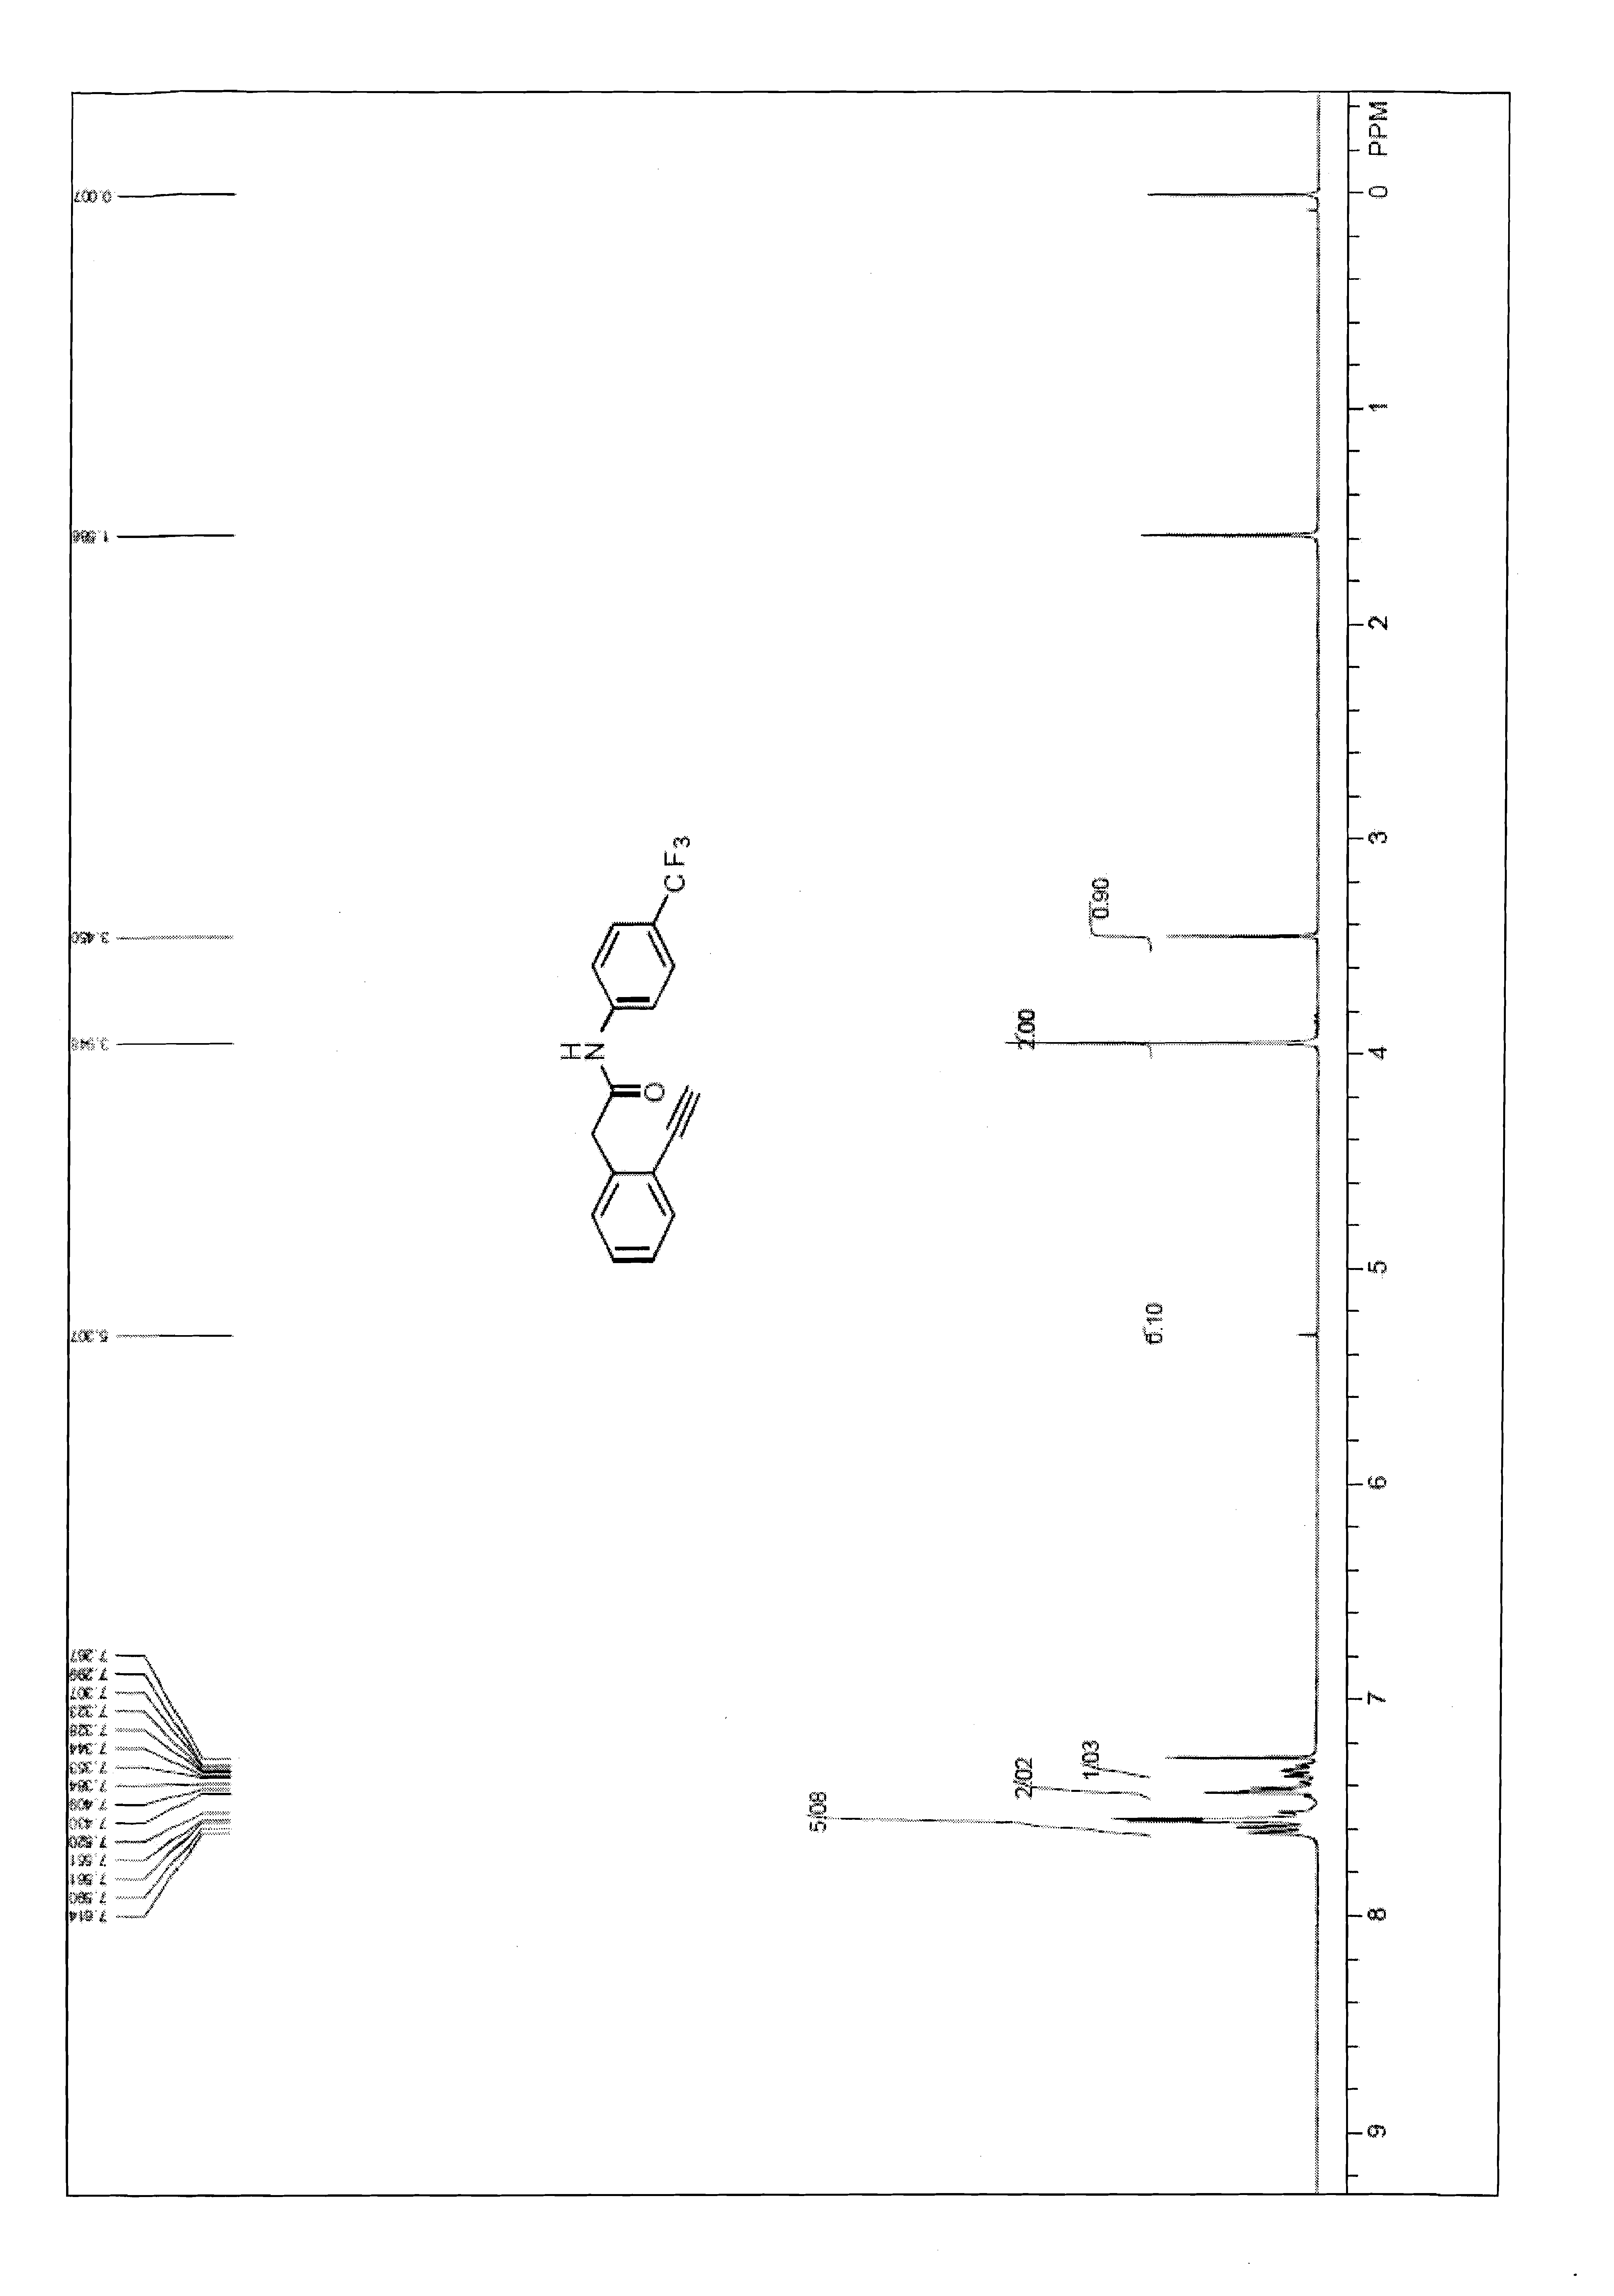


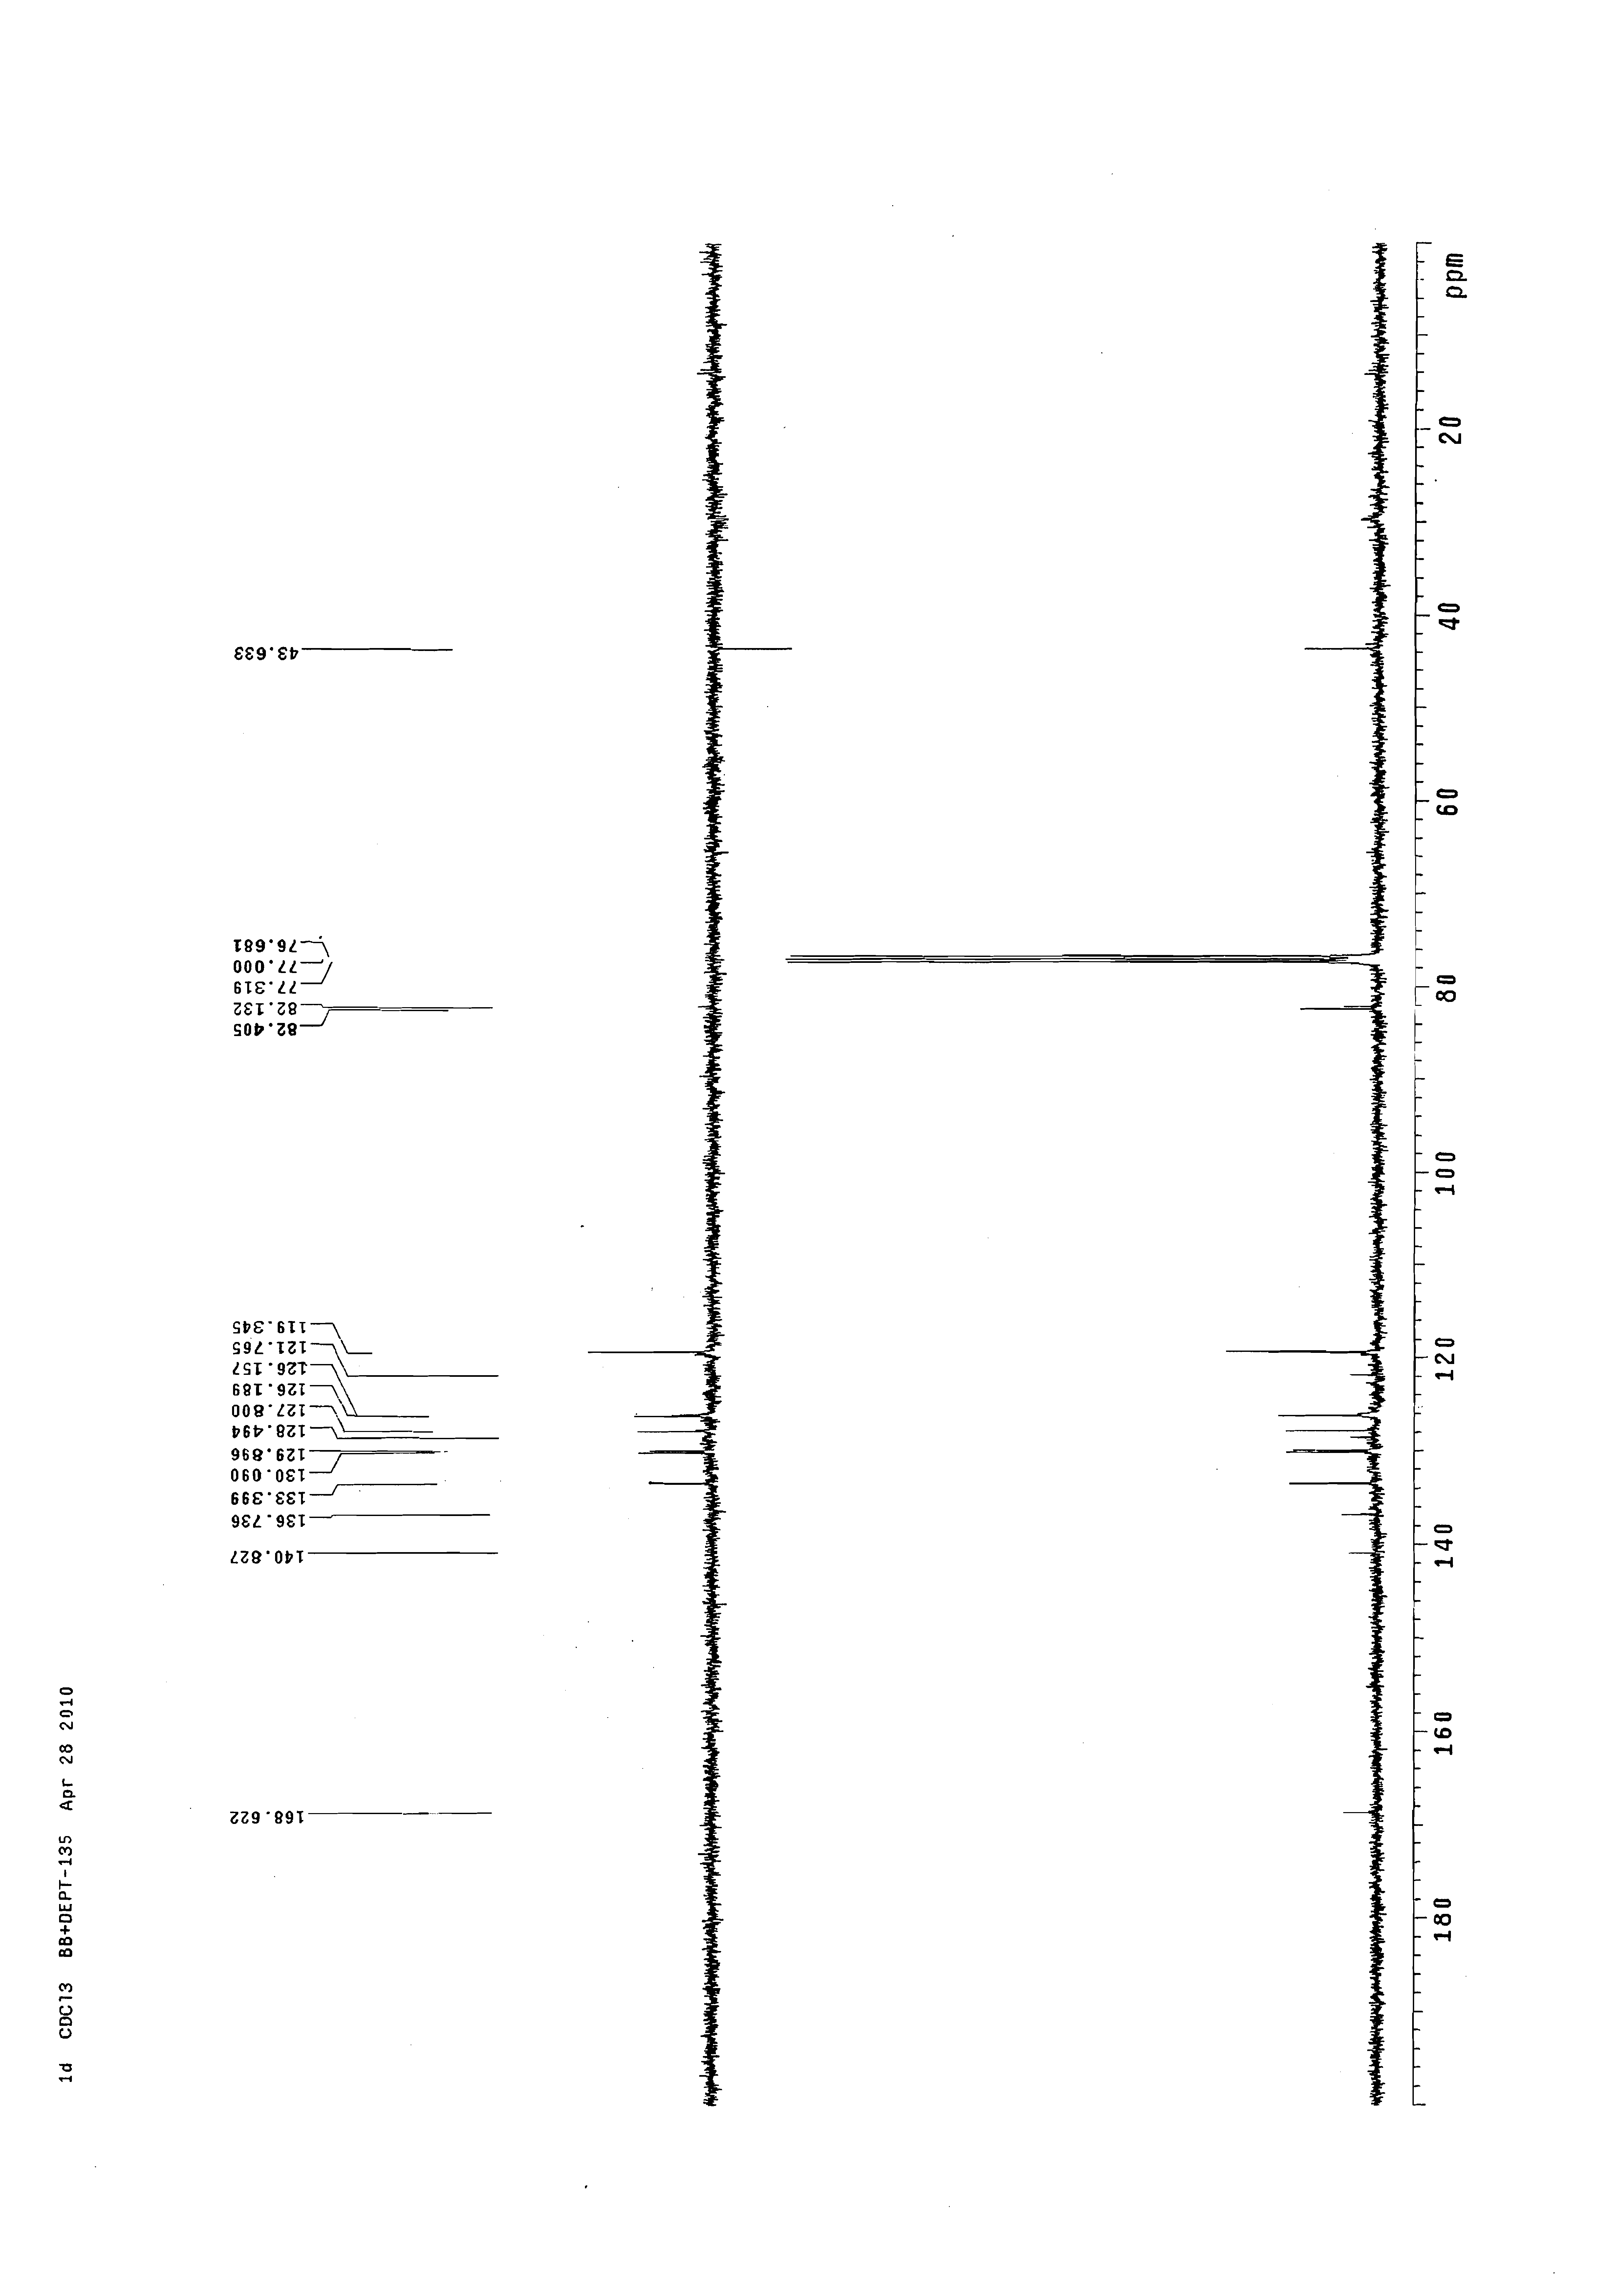


**2-(2-ethynylphenyl)-*N*-(pyridin-4-yl)acetamide (1h)**


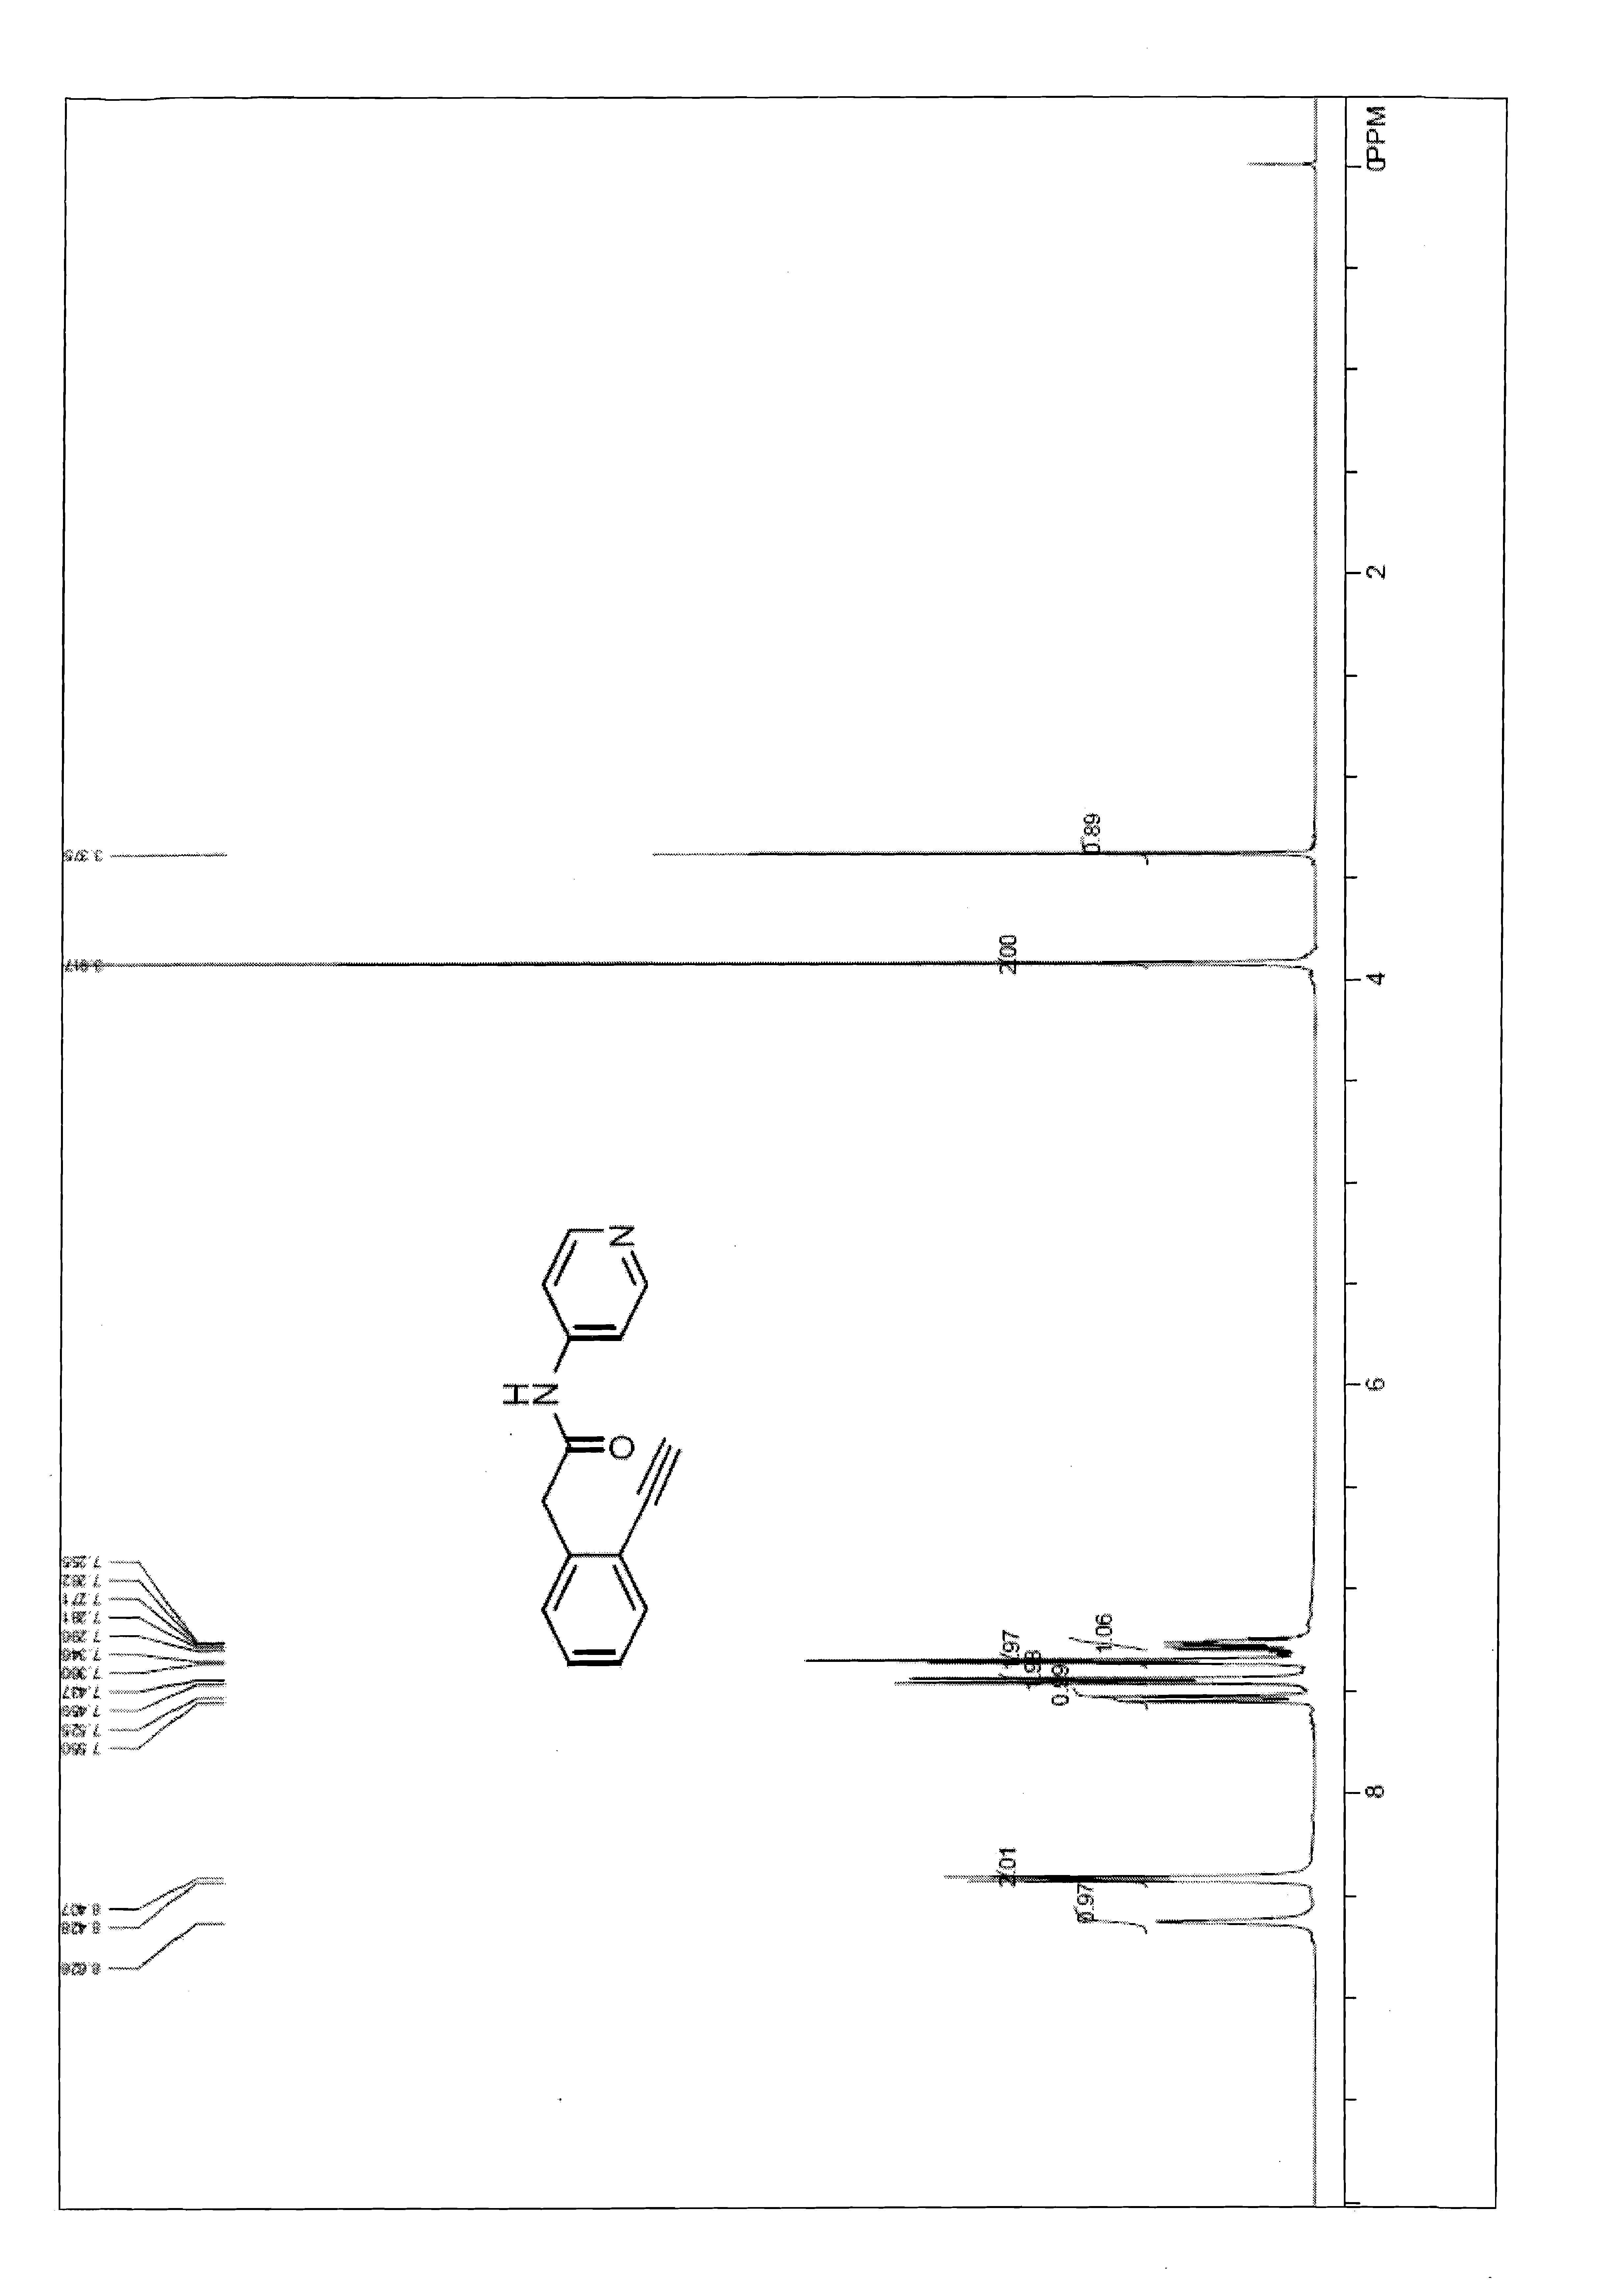


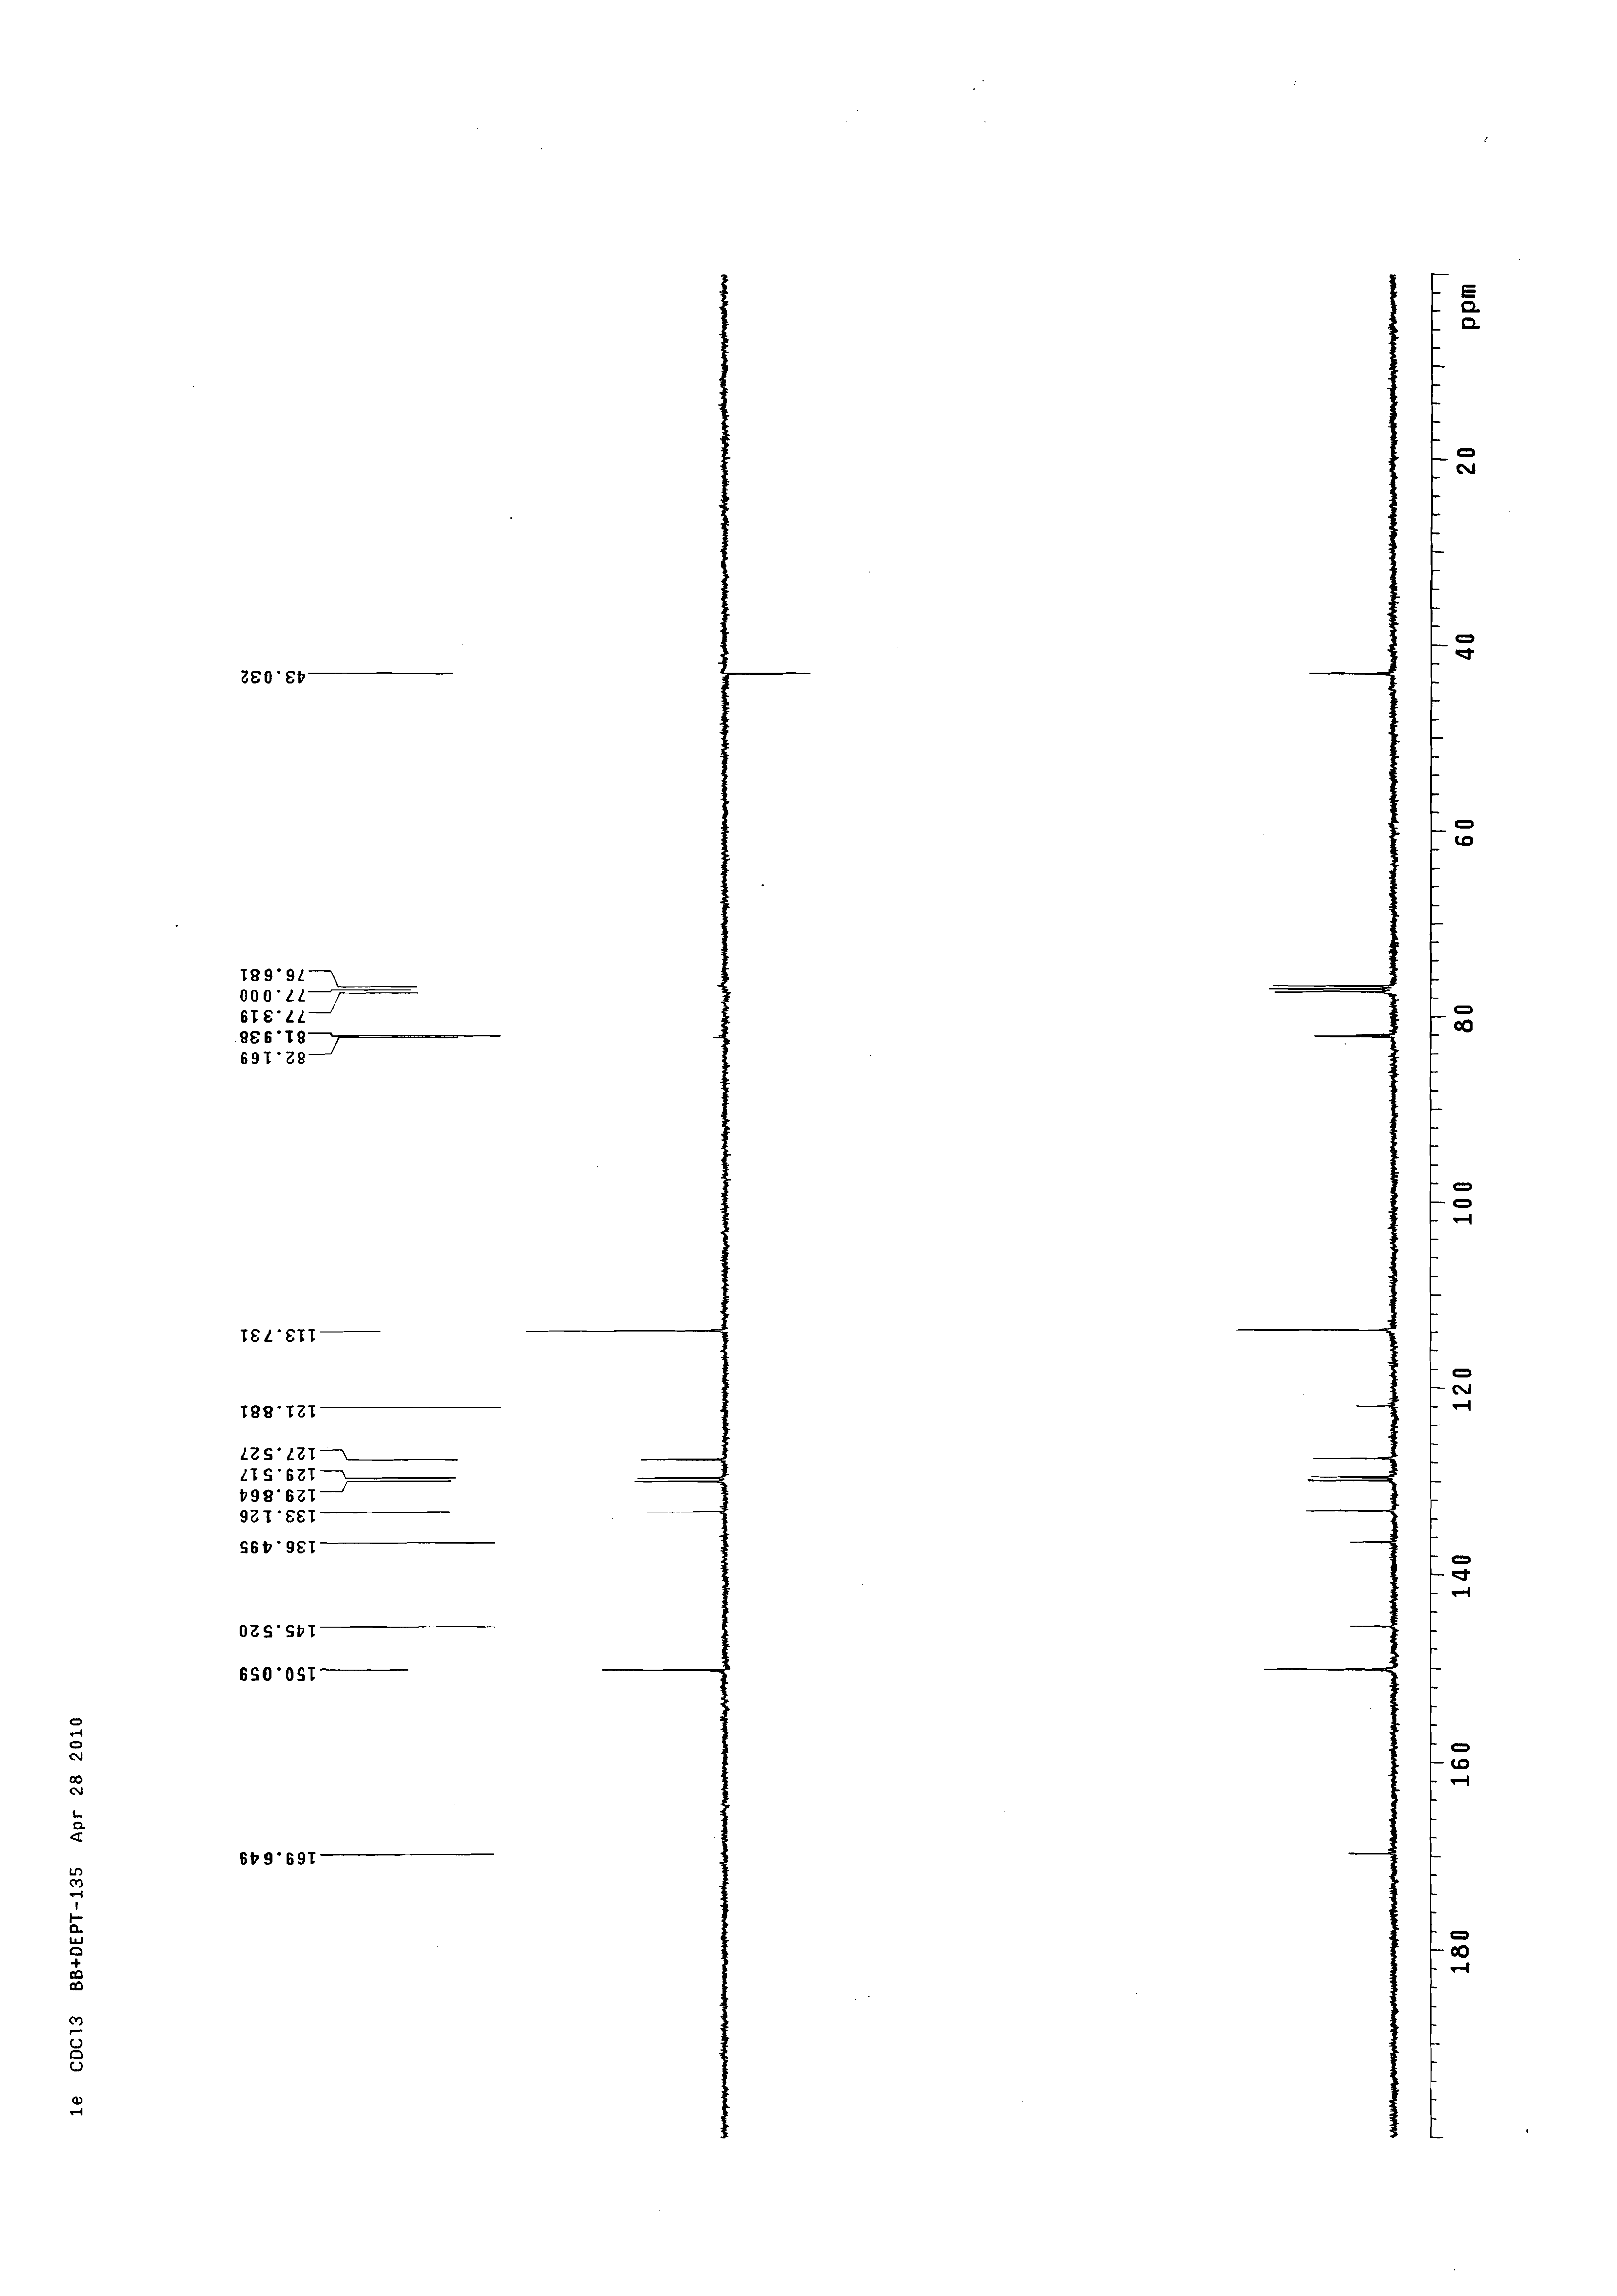


**methyl 2-(2-ethynylphenyl)acetate (1i)**


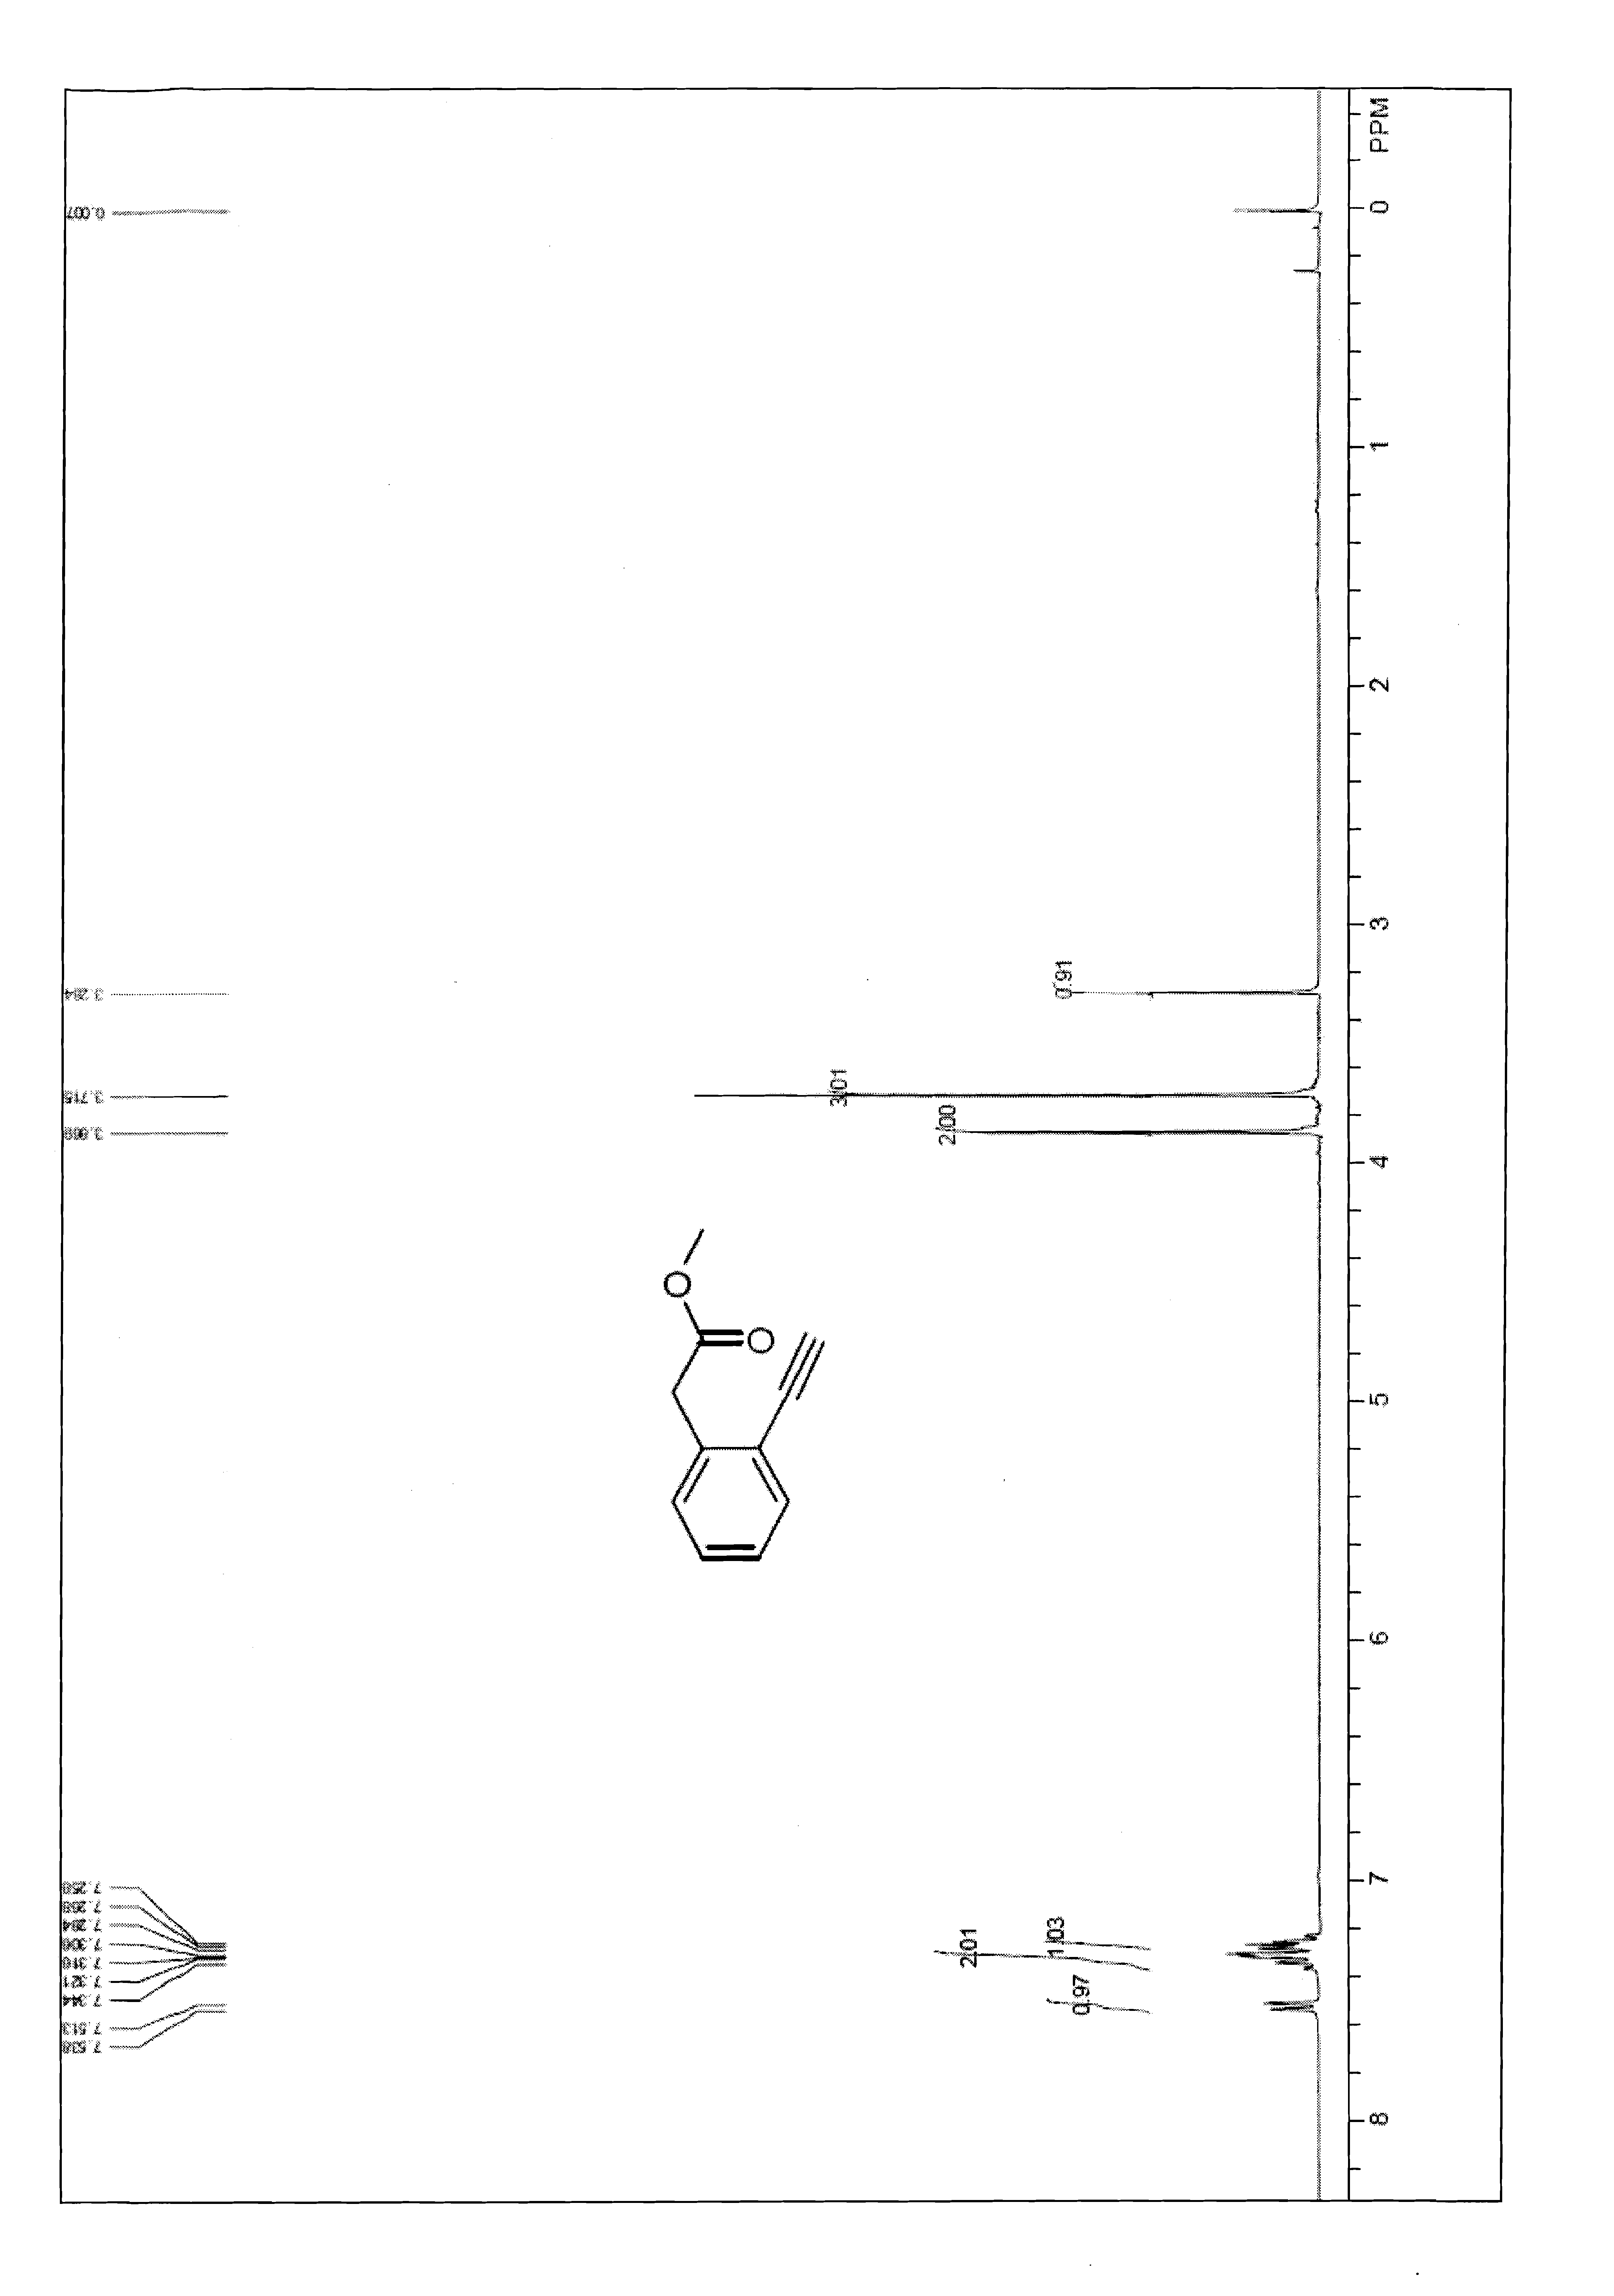


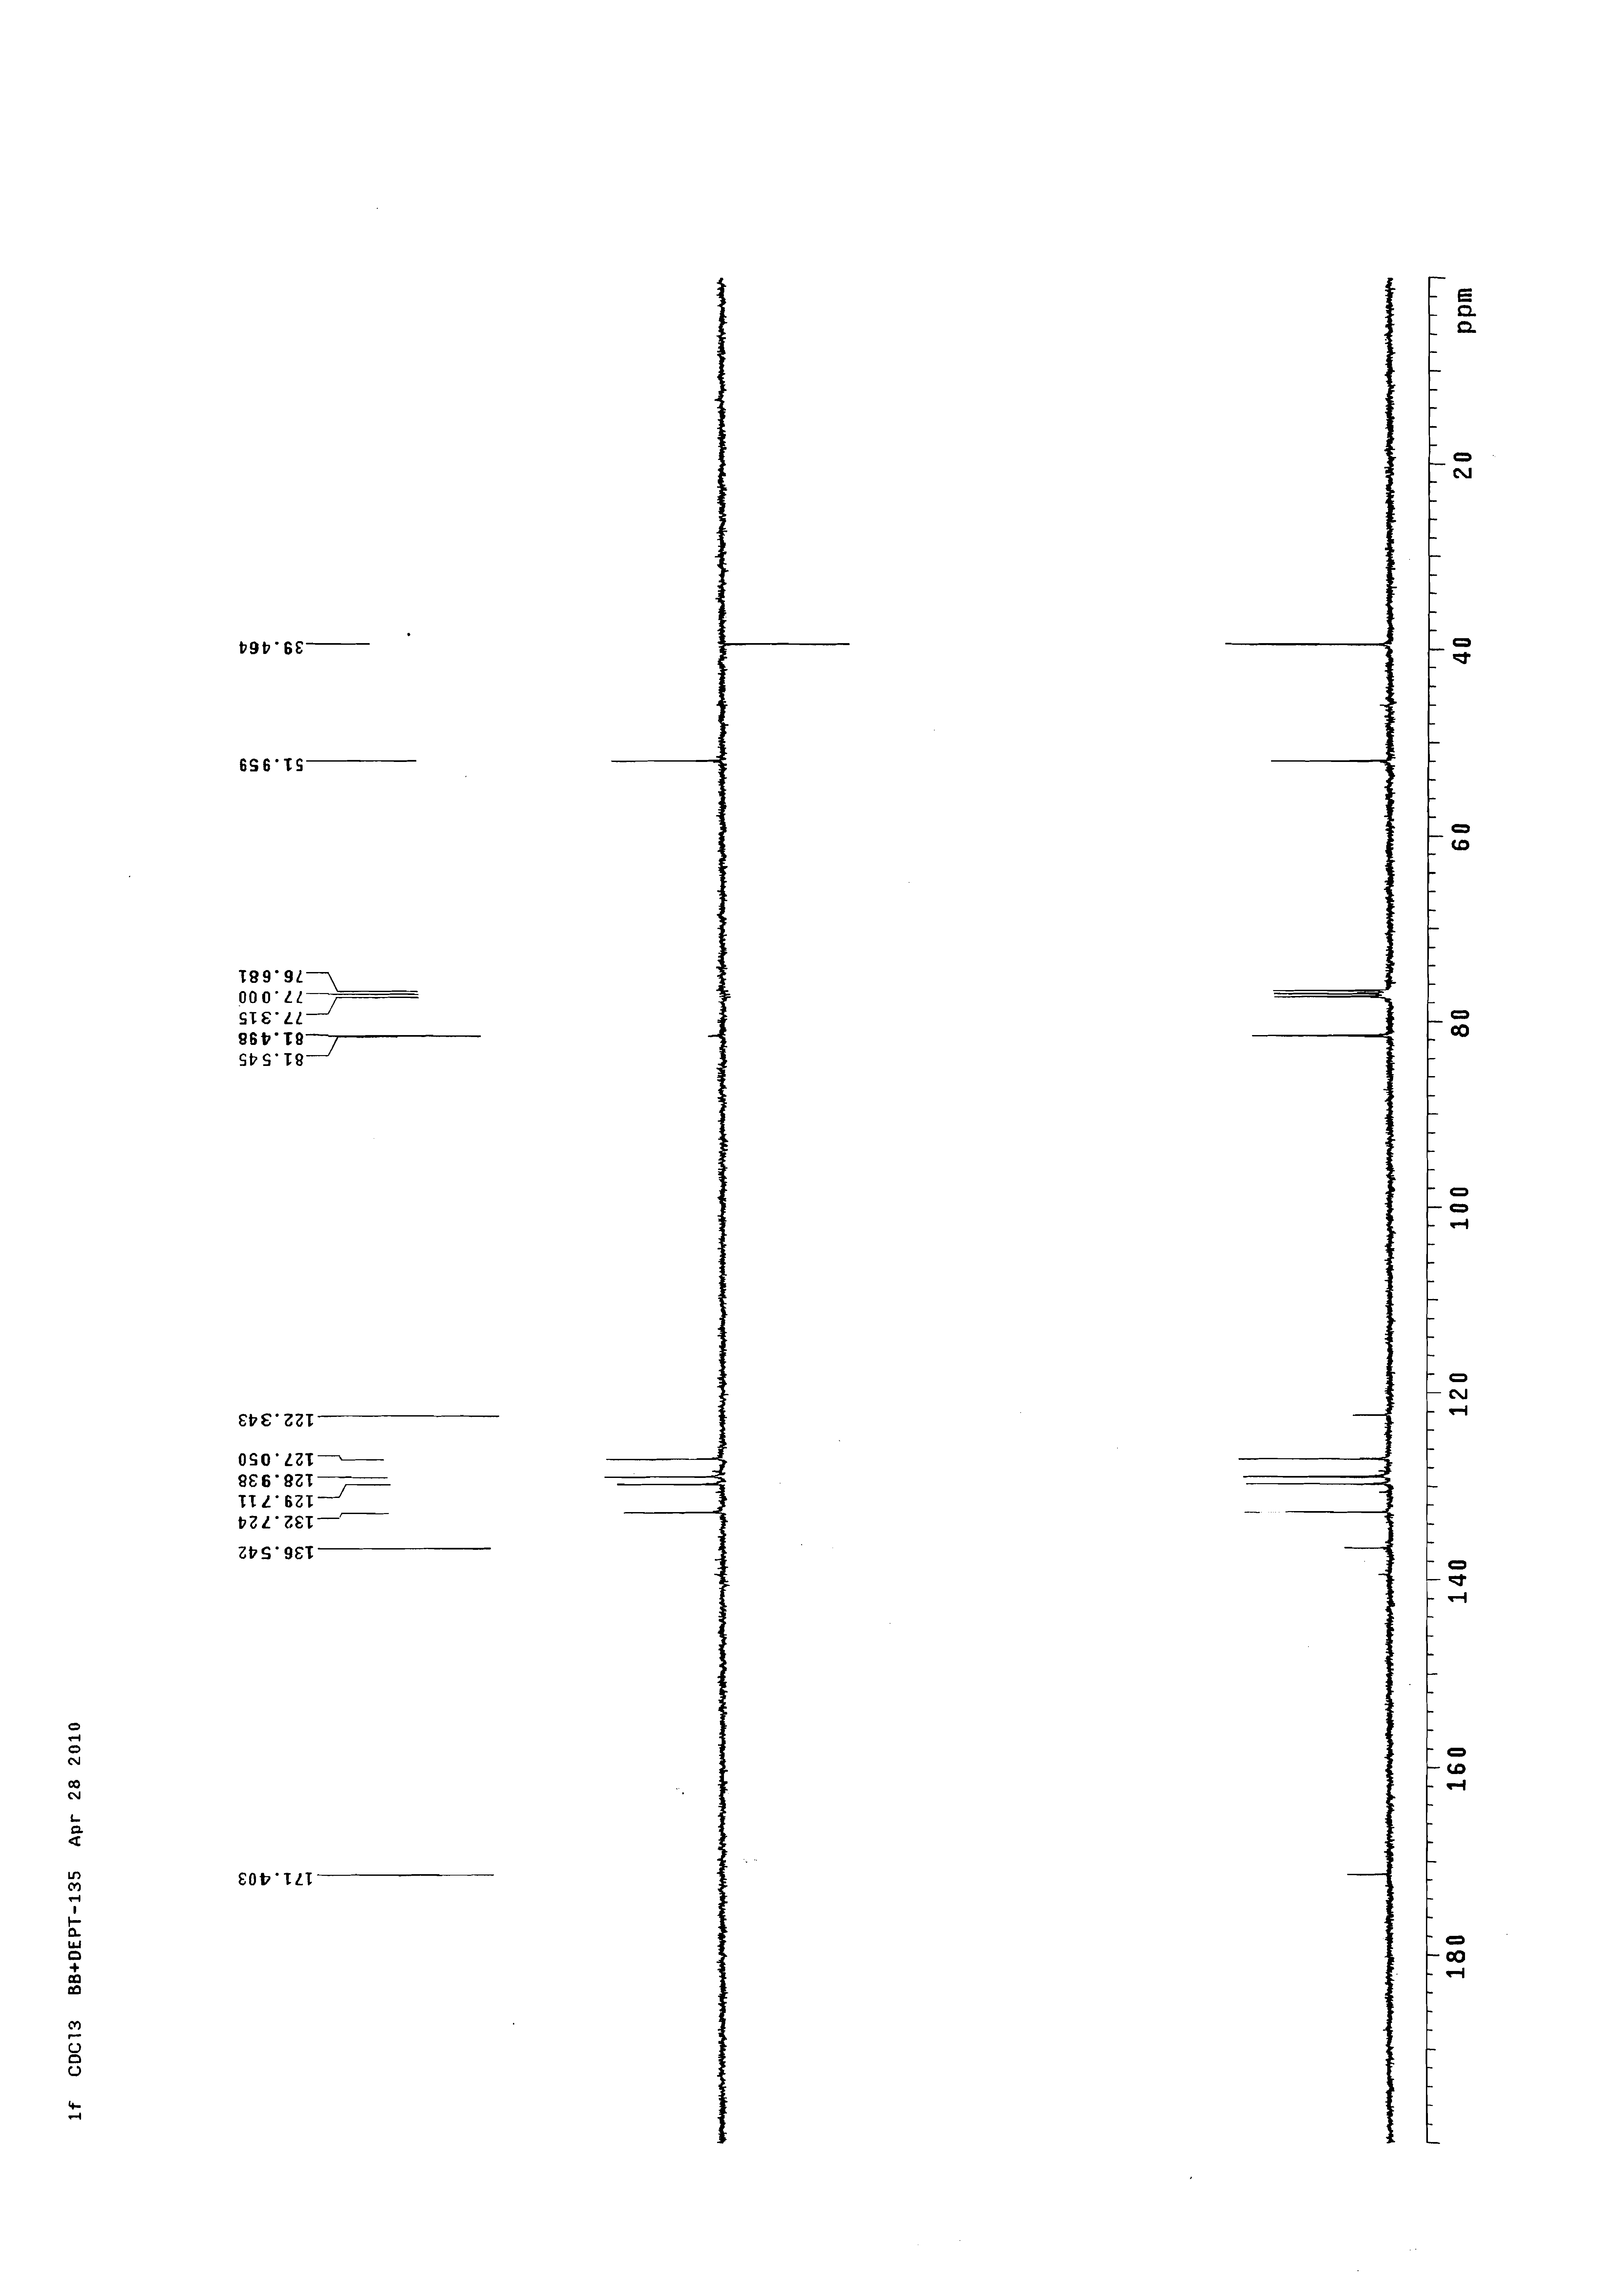


***N*-butyl-2-(2-ethynyl-5-methoxyphenyl)acetamide (1j)**

**
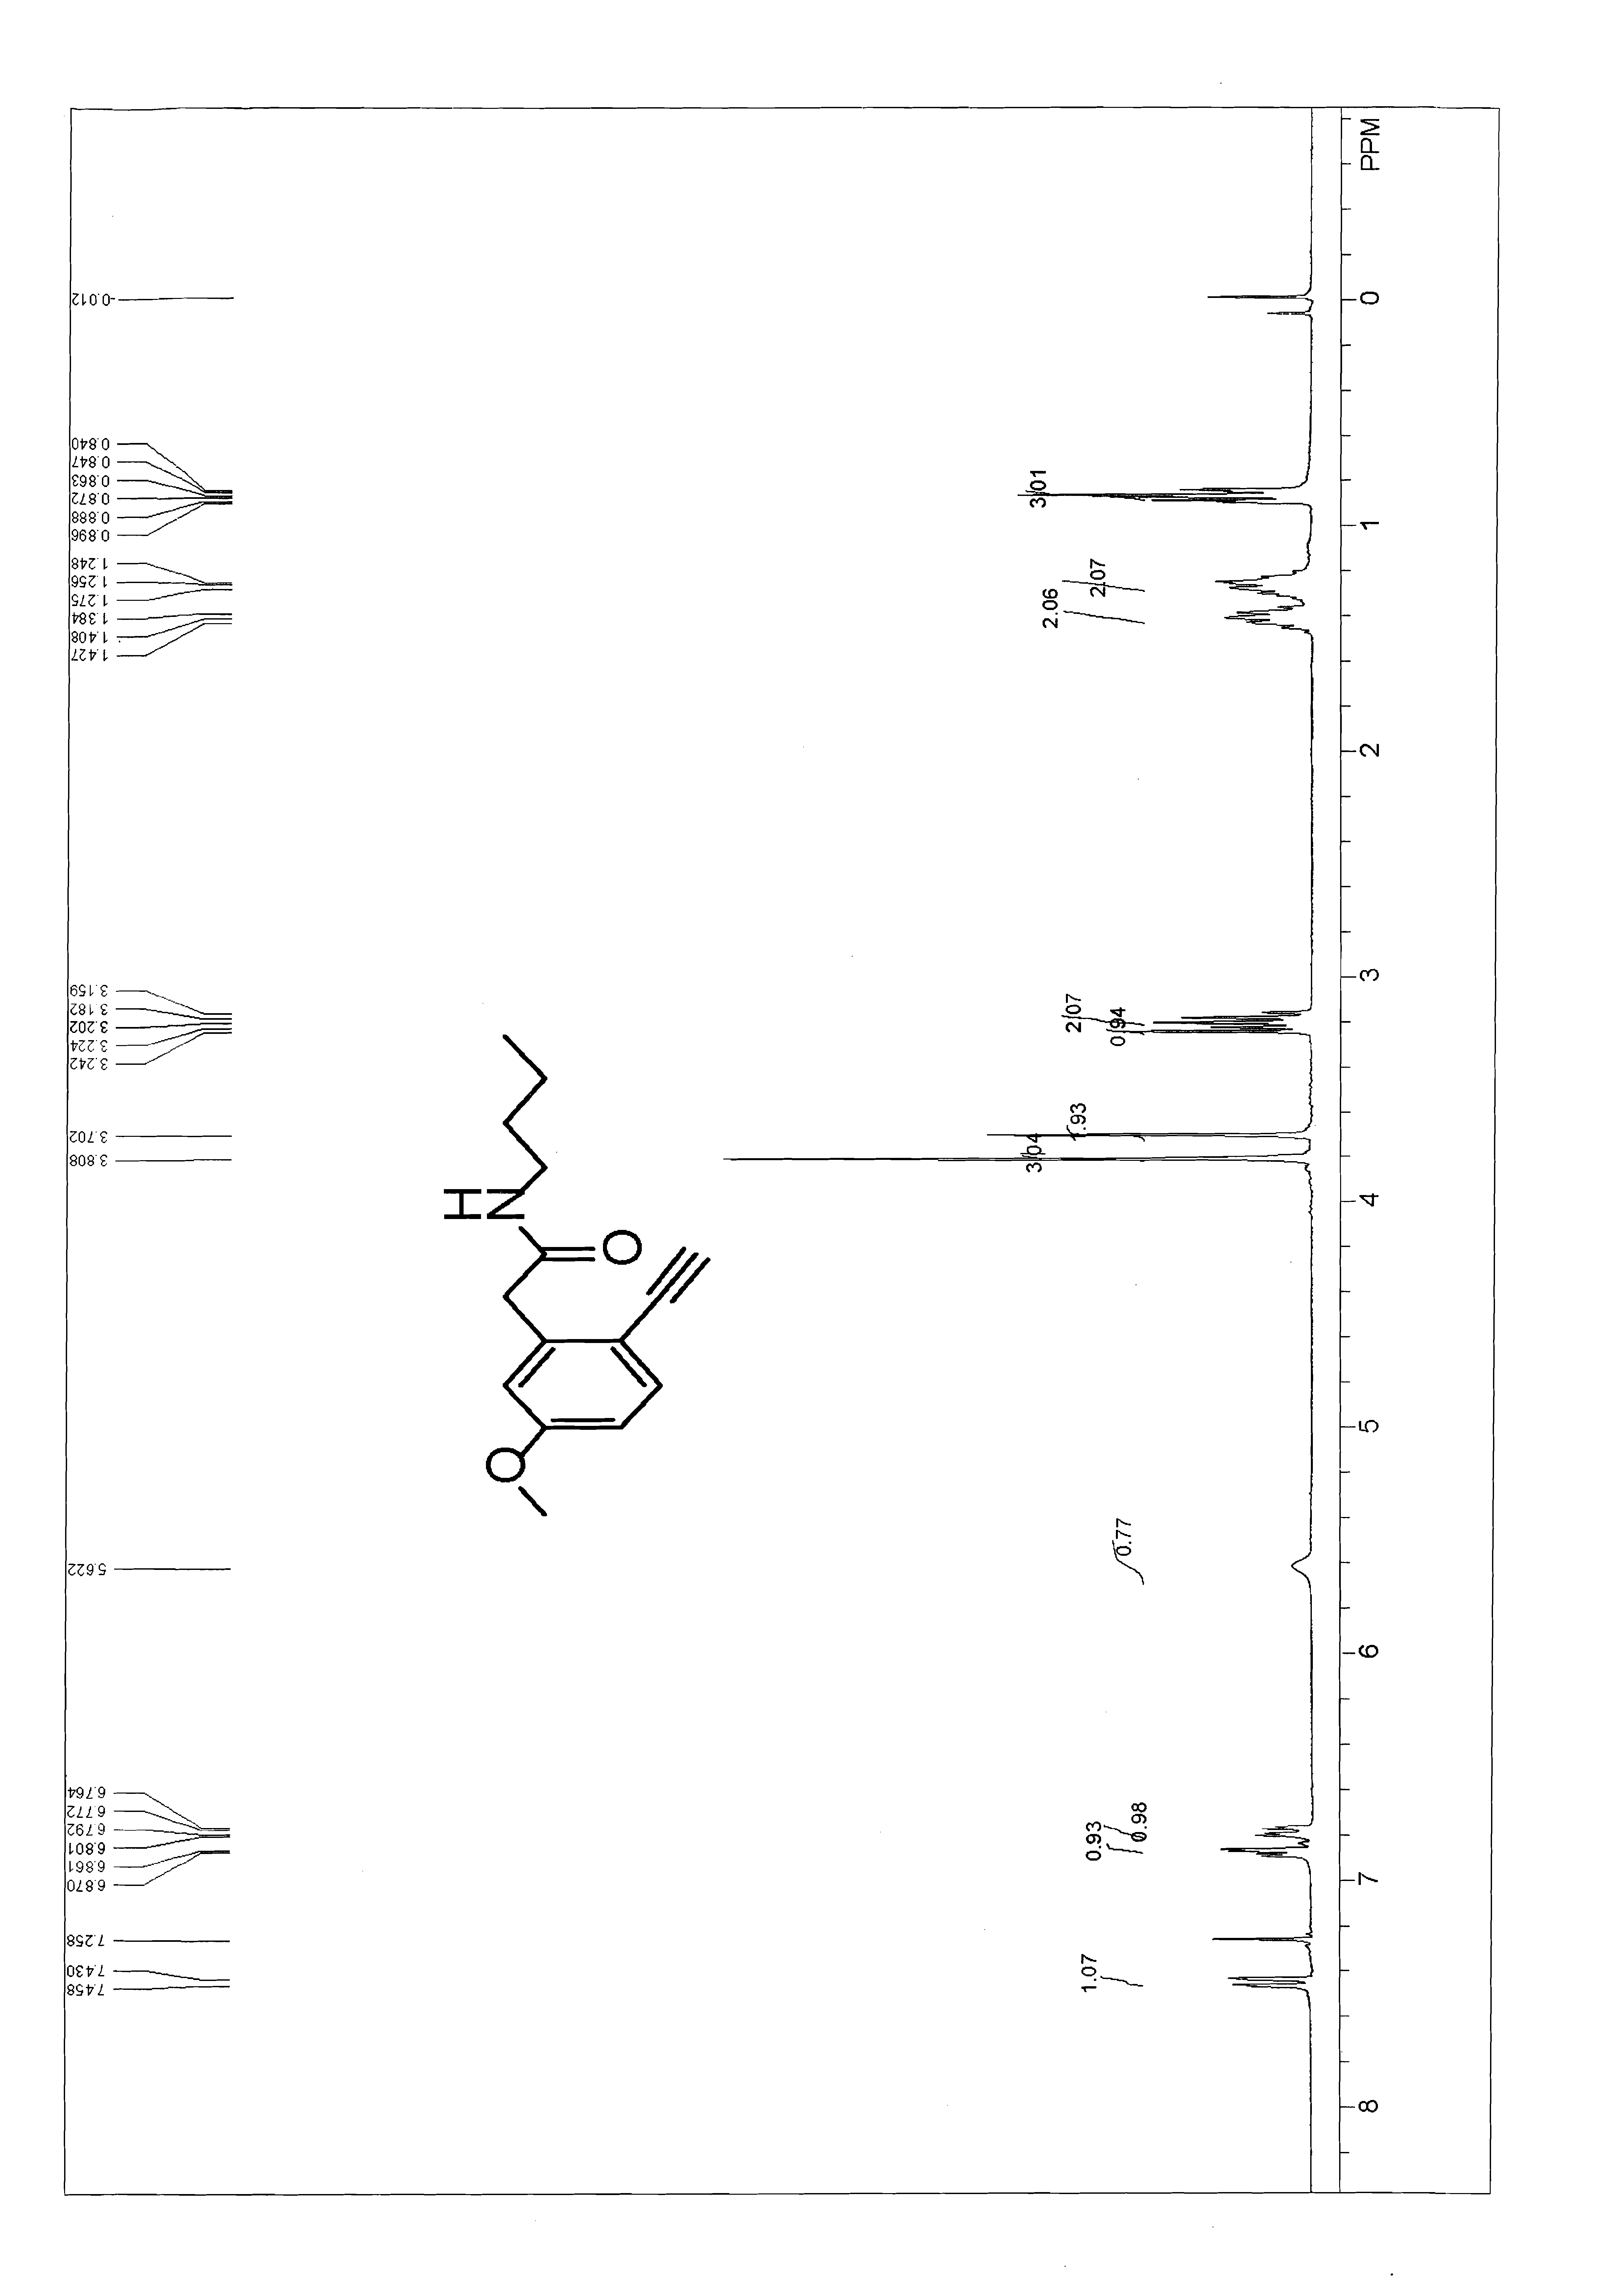
**

**
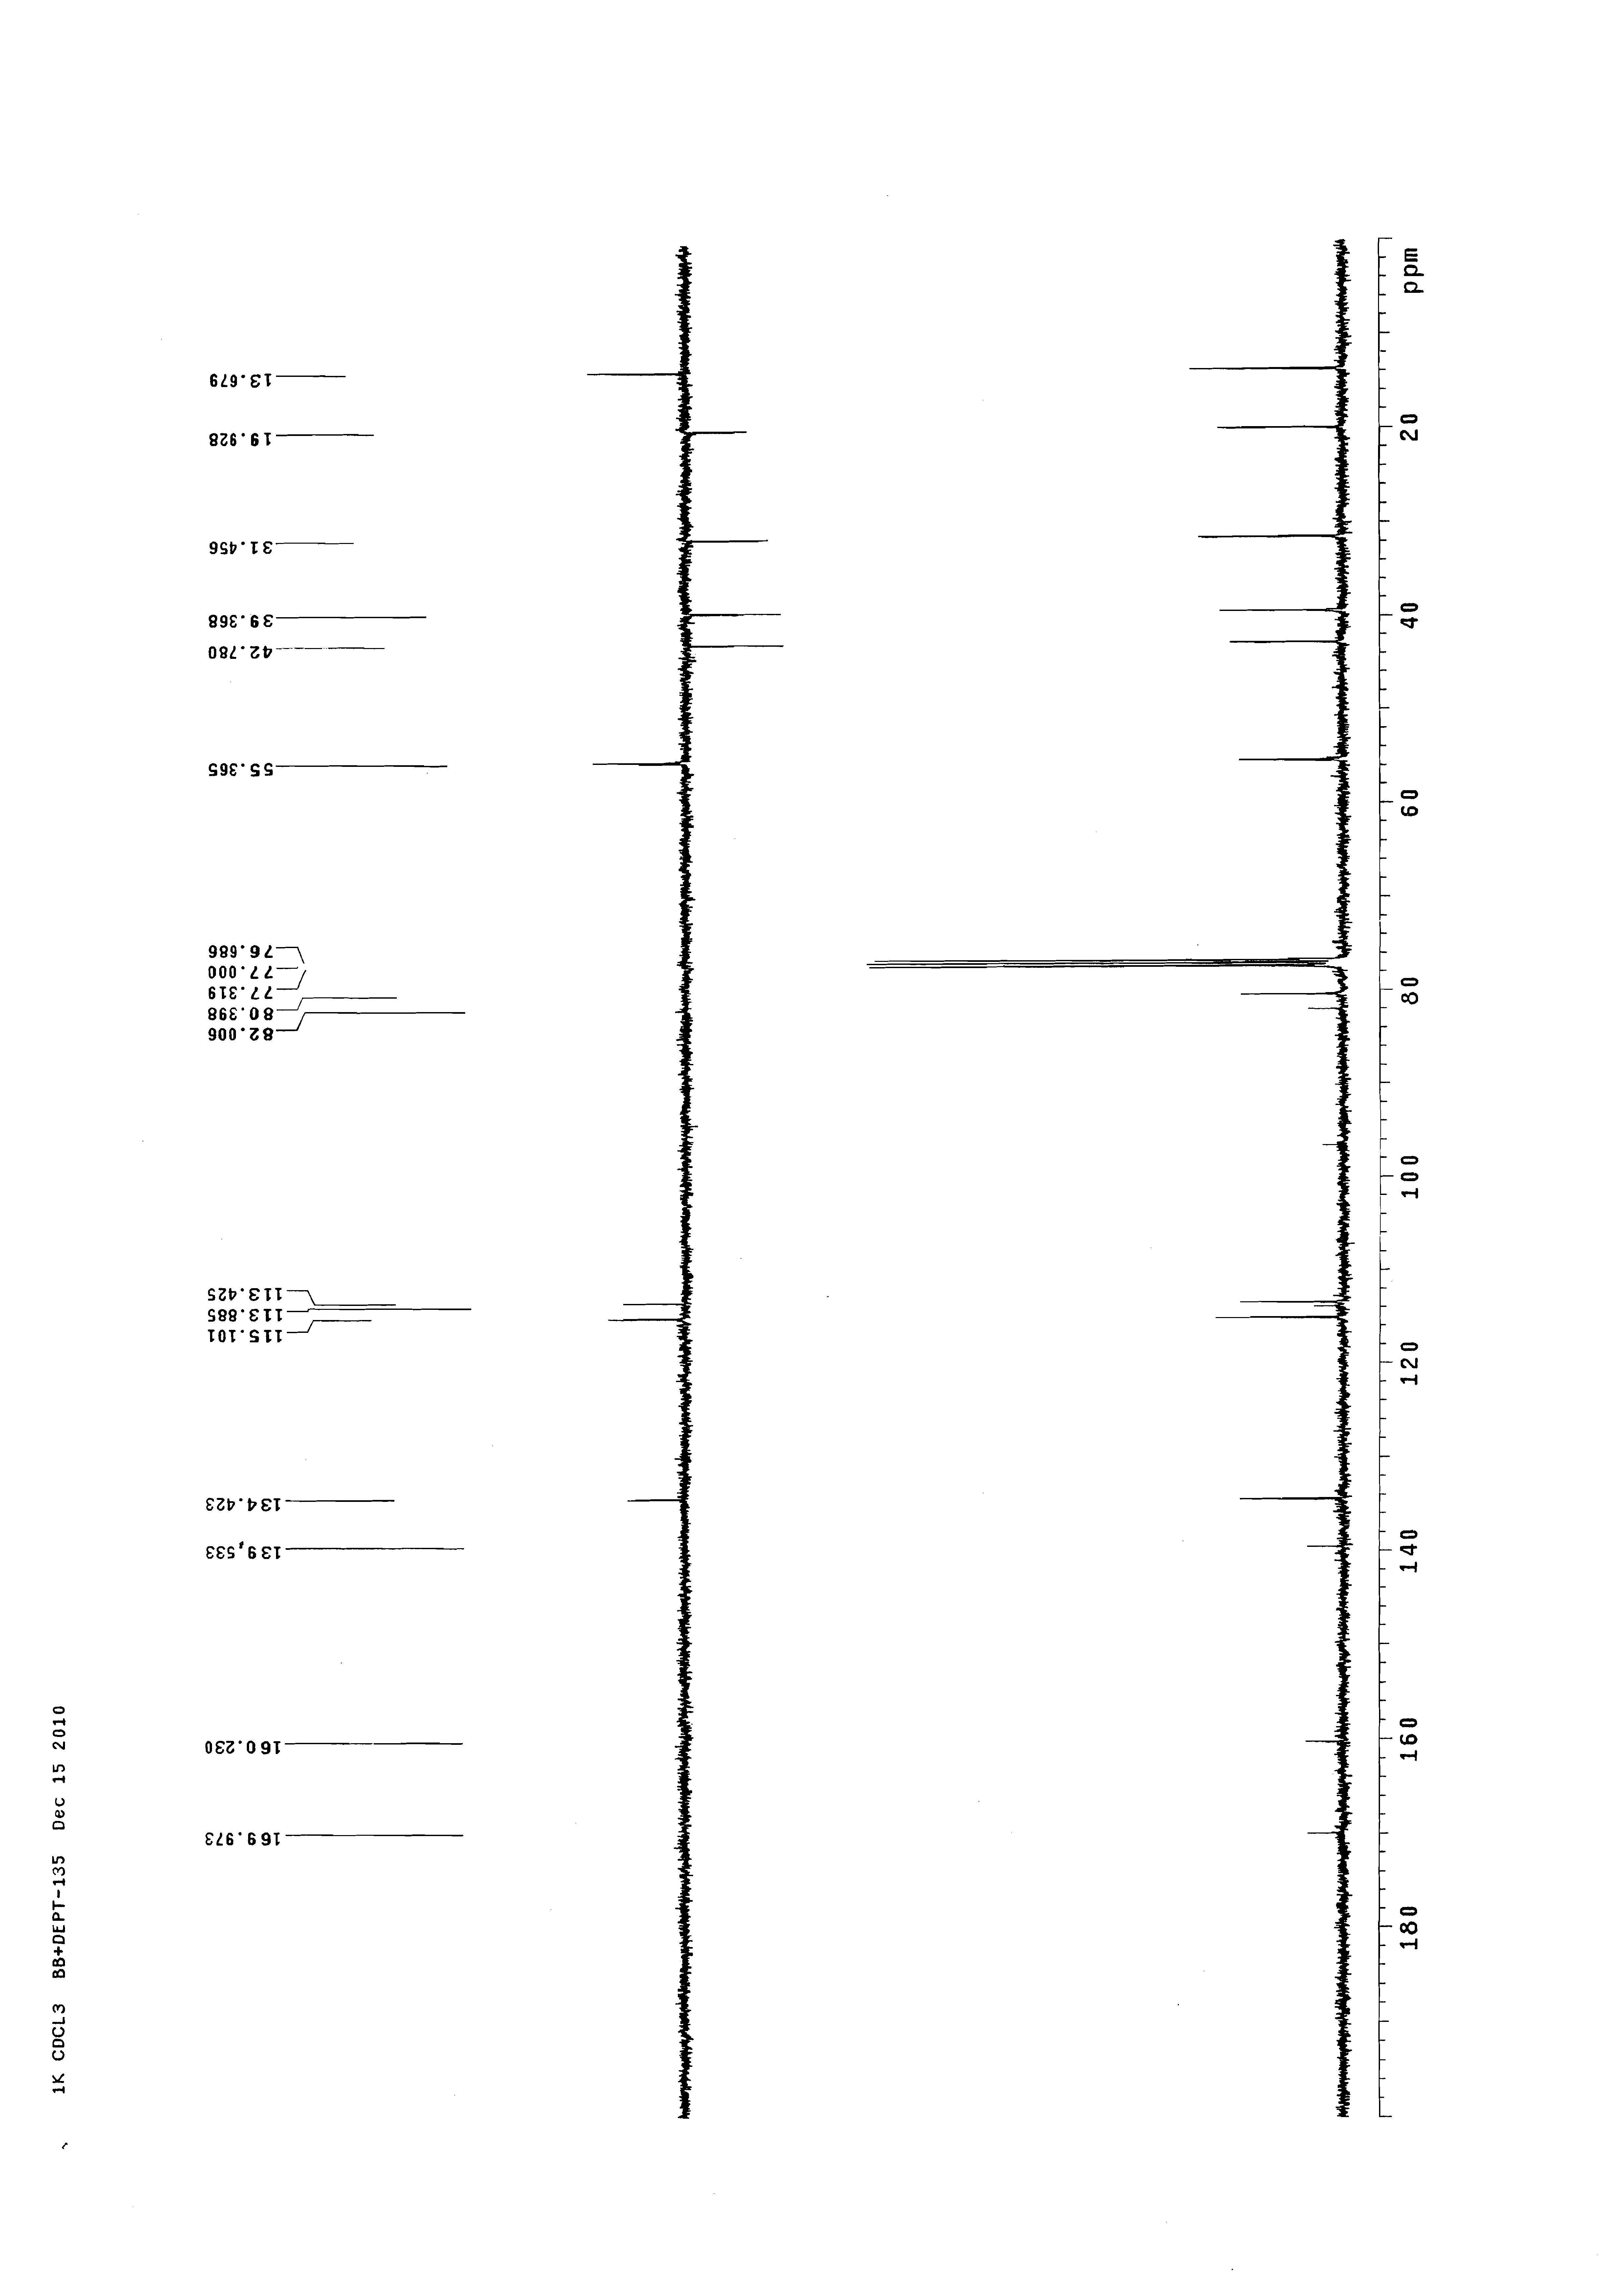
**

***N*-butyl-2-(2-ethynyl-4-methoxyphenyl)acetamide (1k)**

**
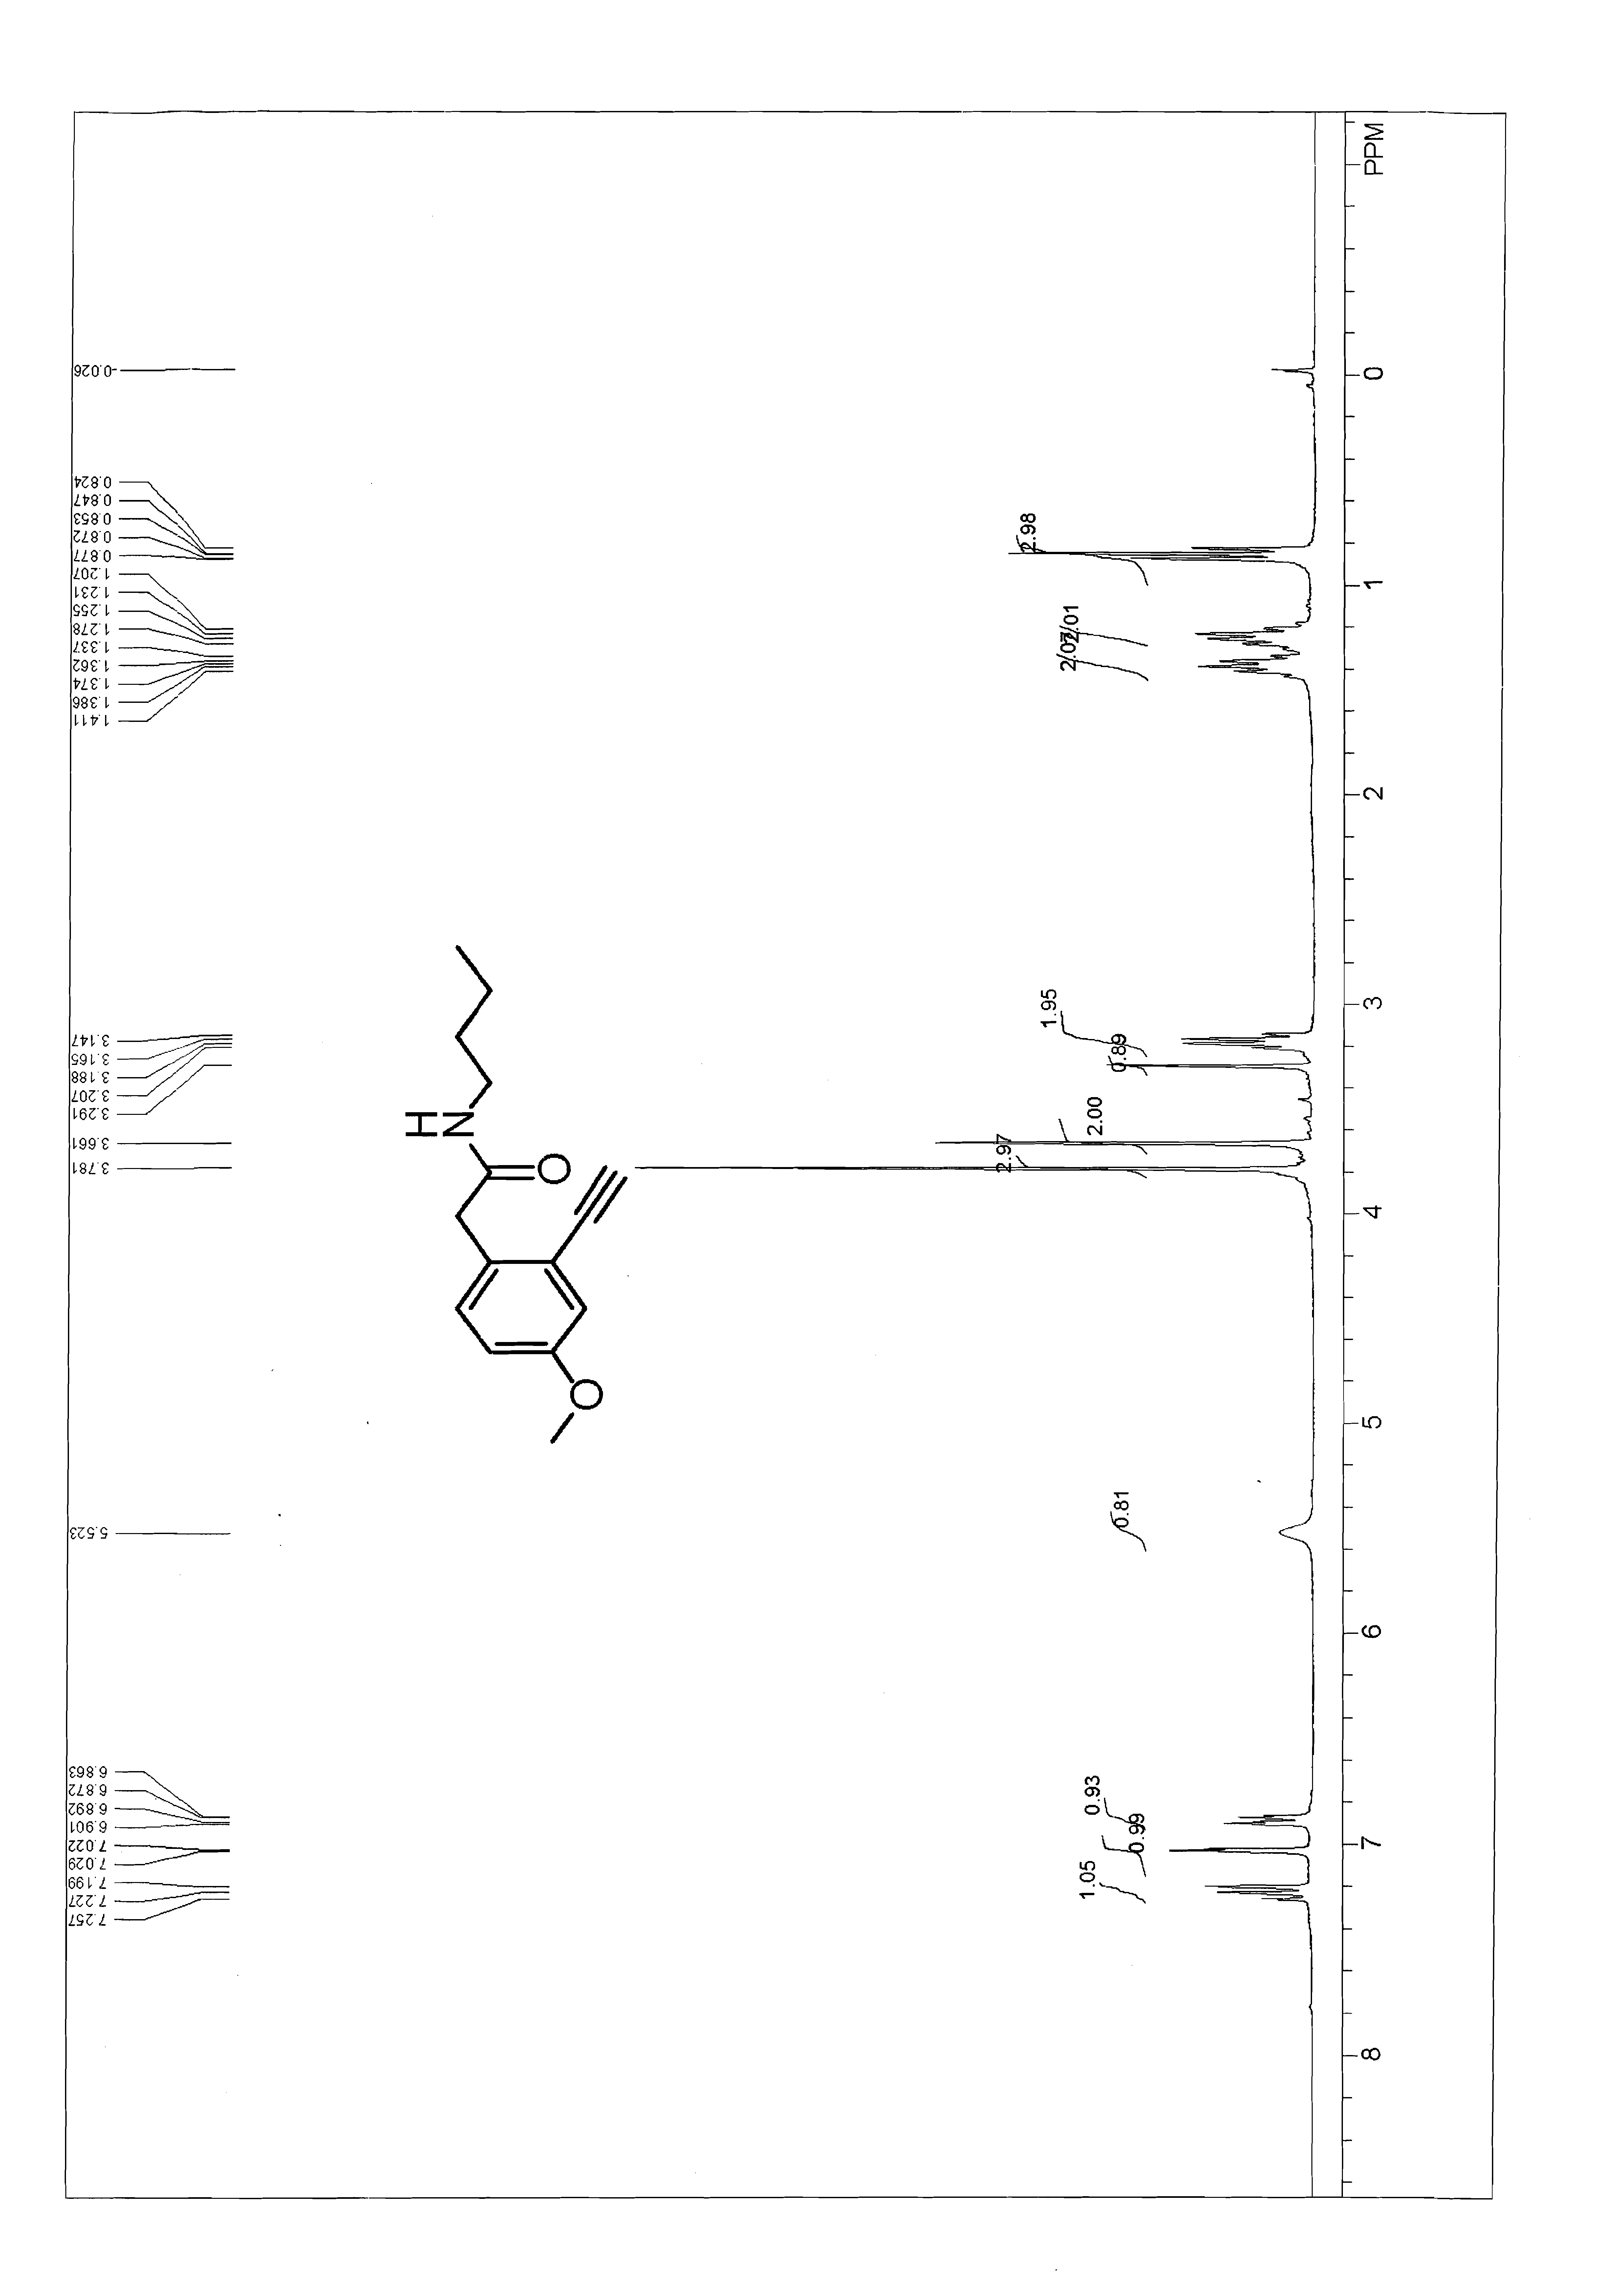
**

**
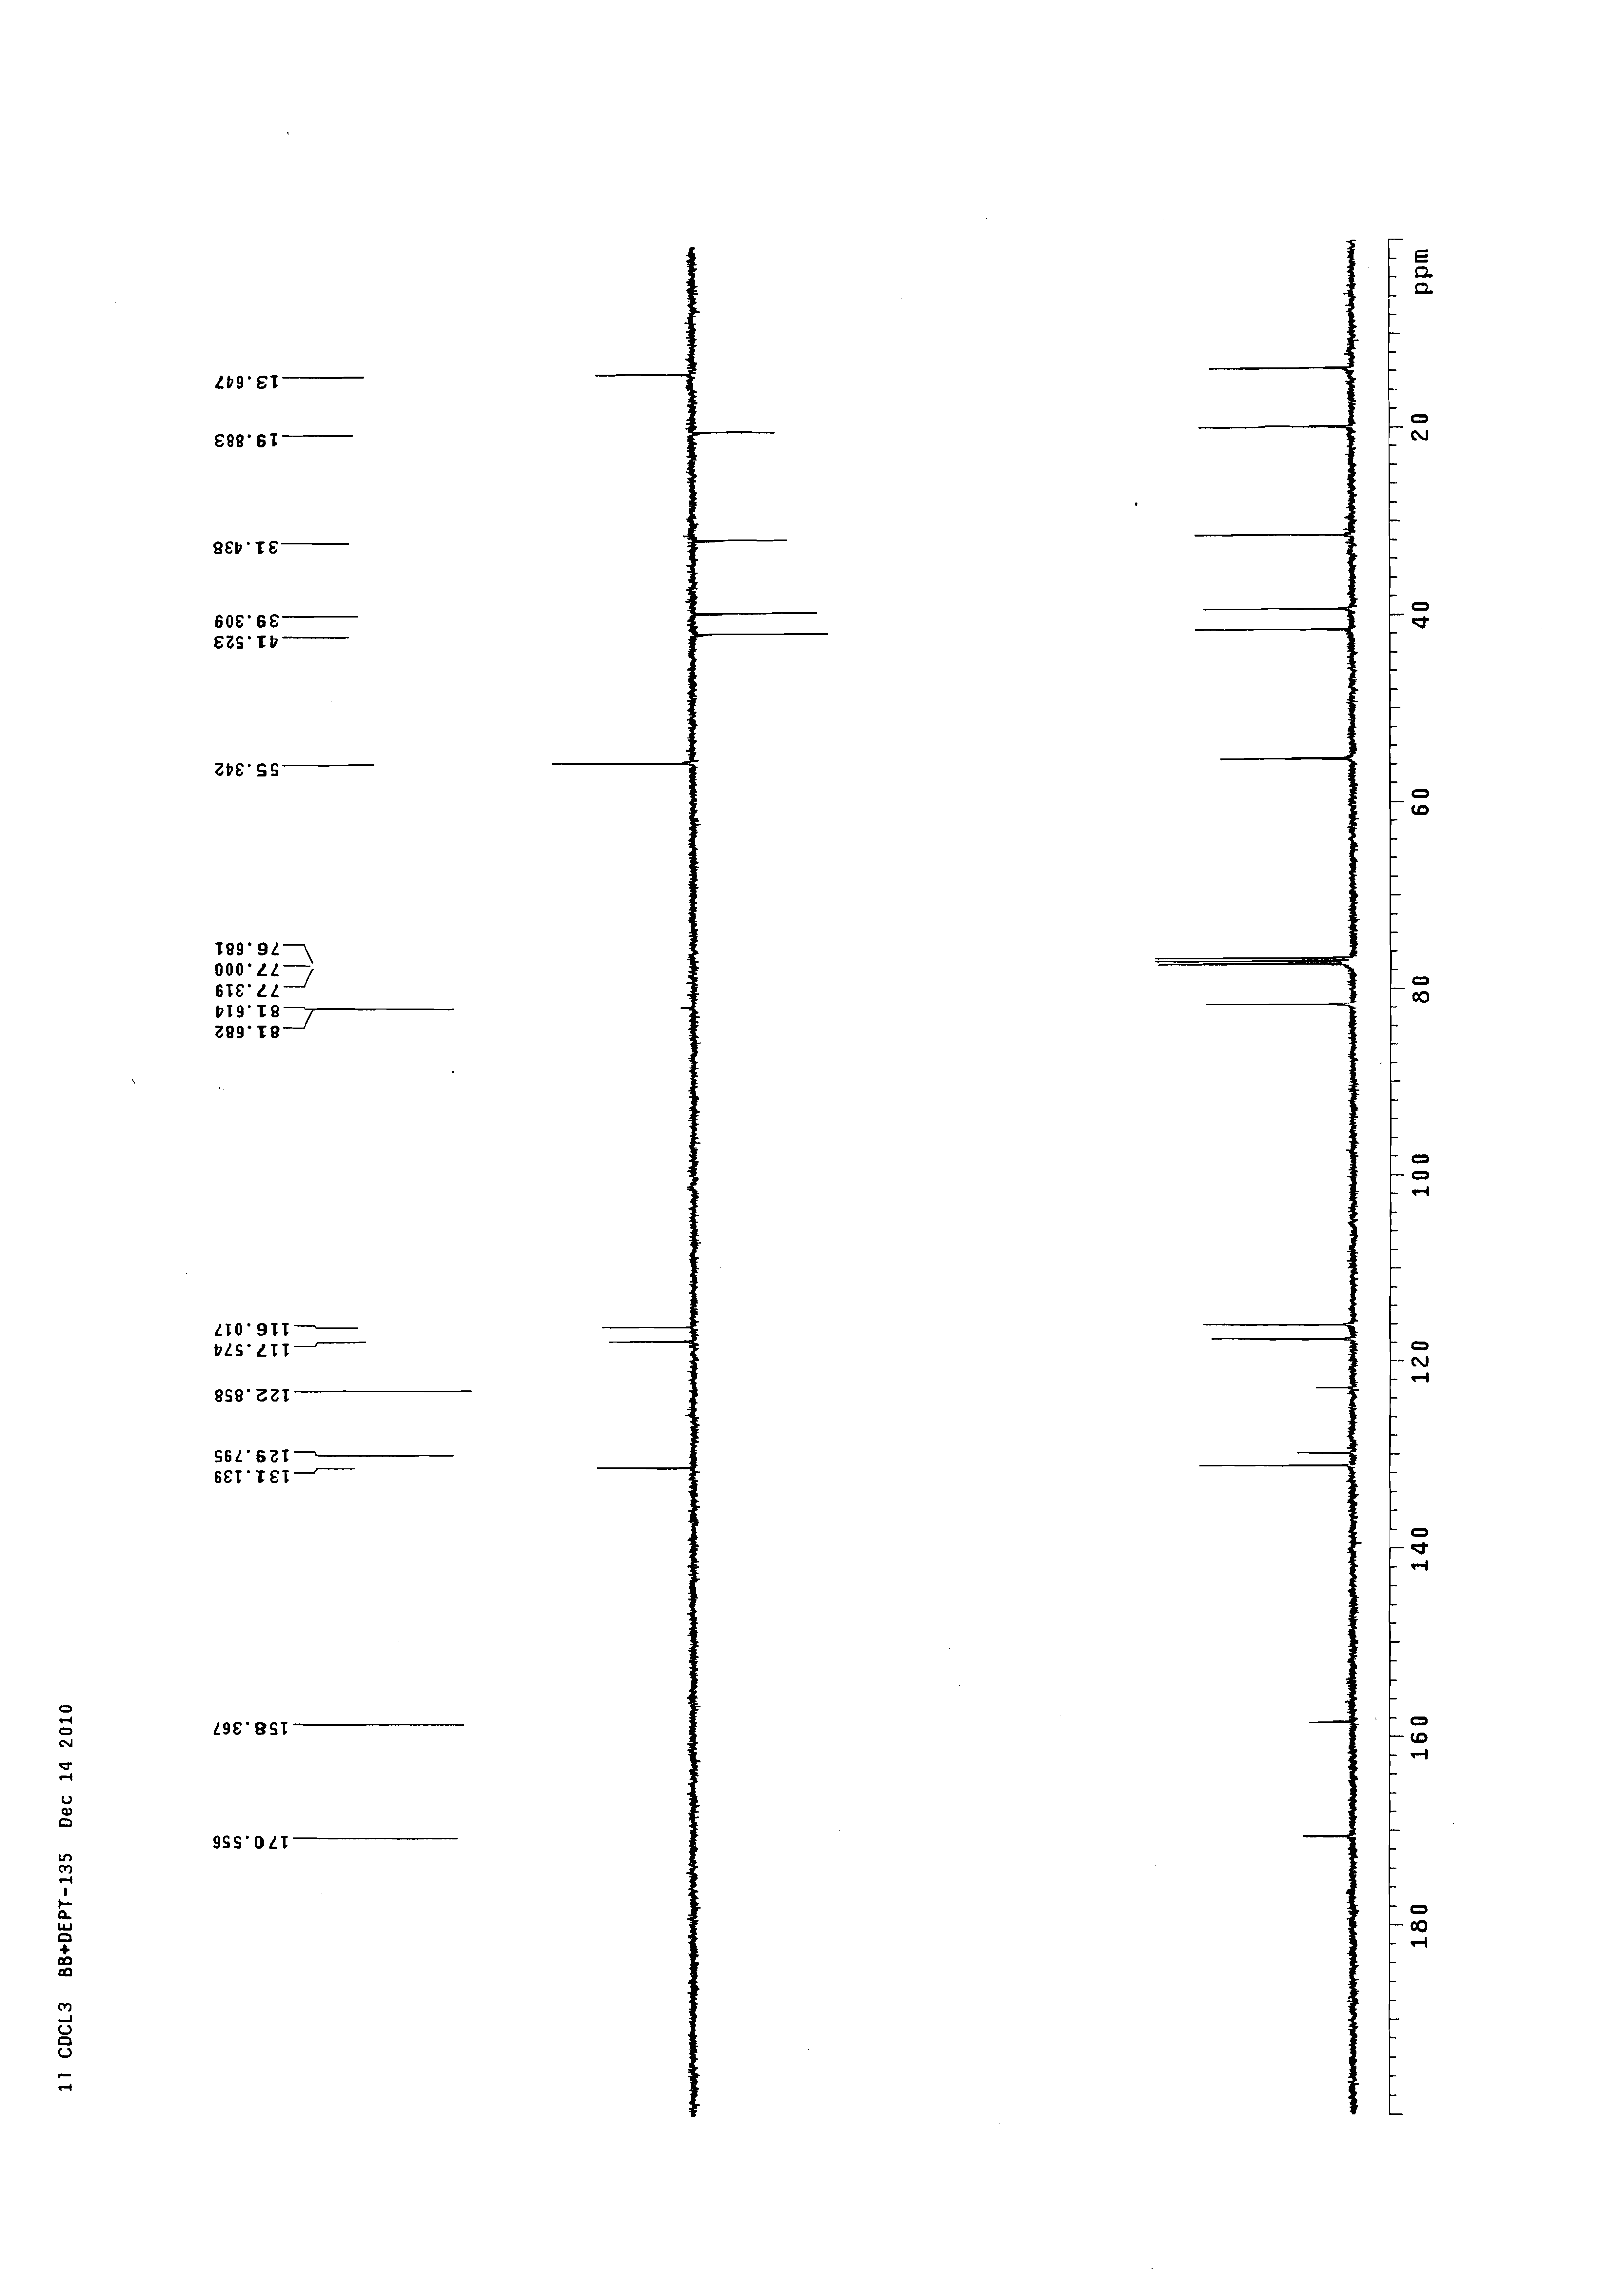
**

***N*-butyl-2-(2-ethynyl-4,5-dimethoxyphenyl)acetamide (1l)**


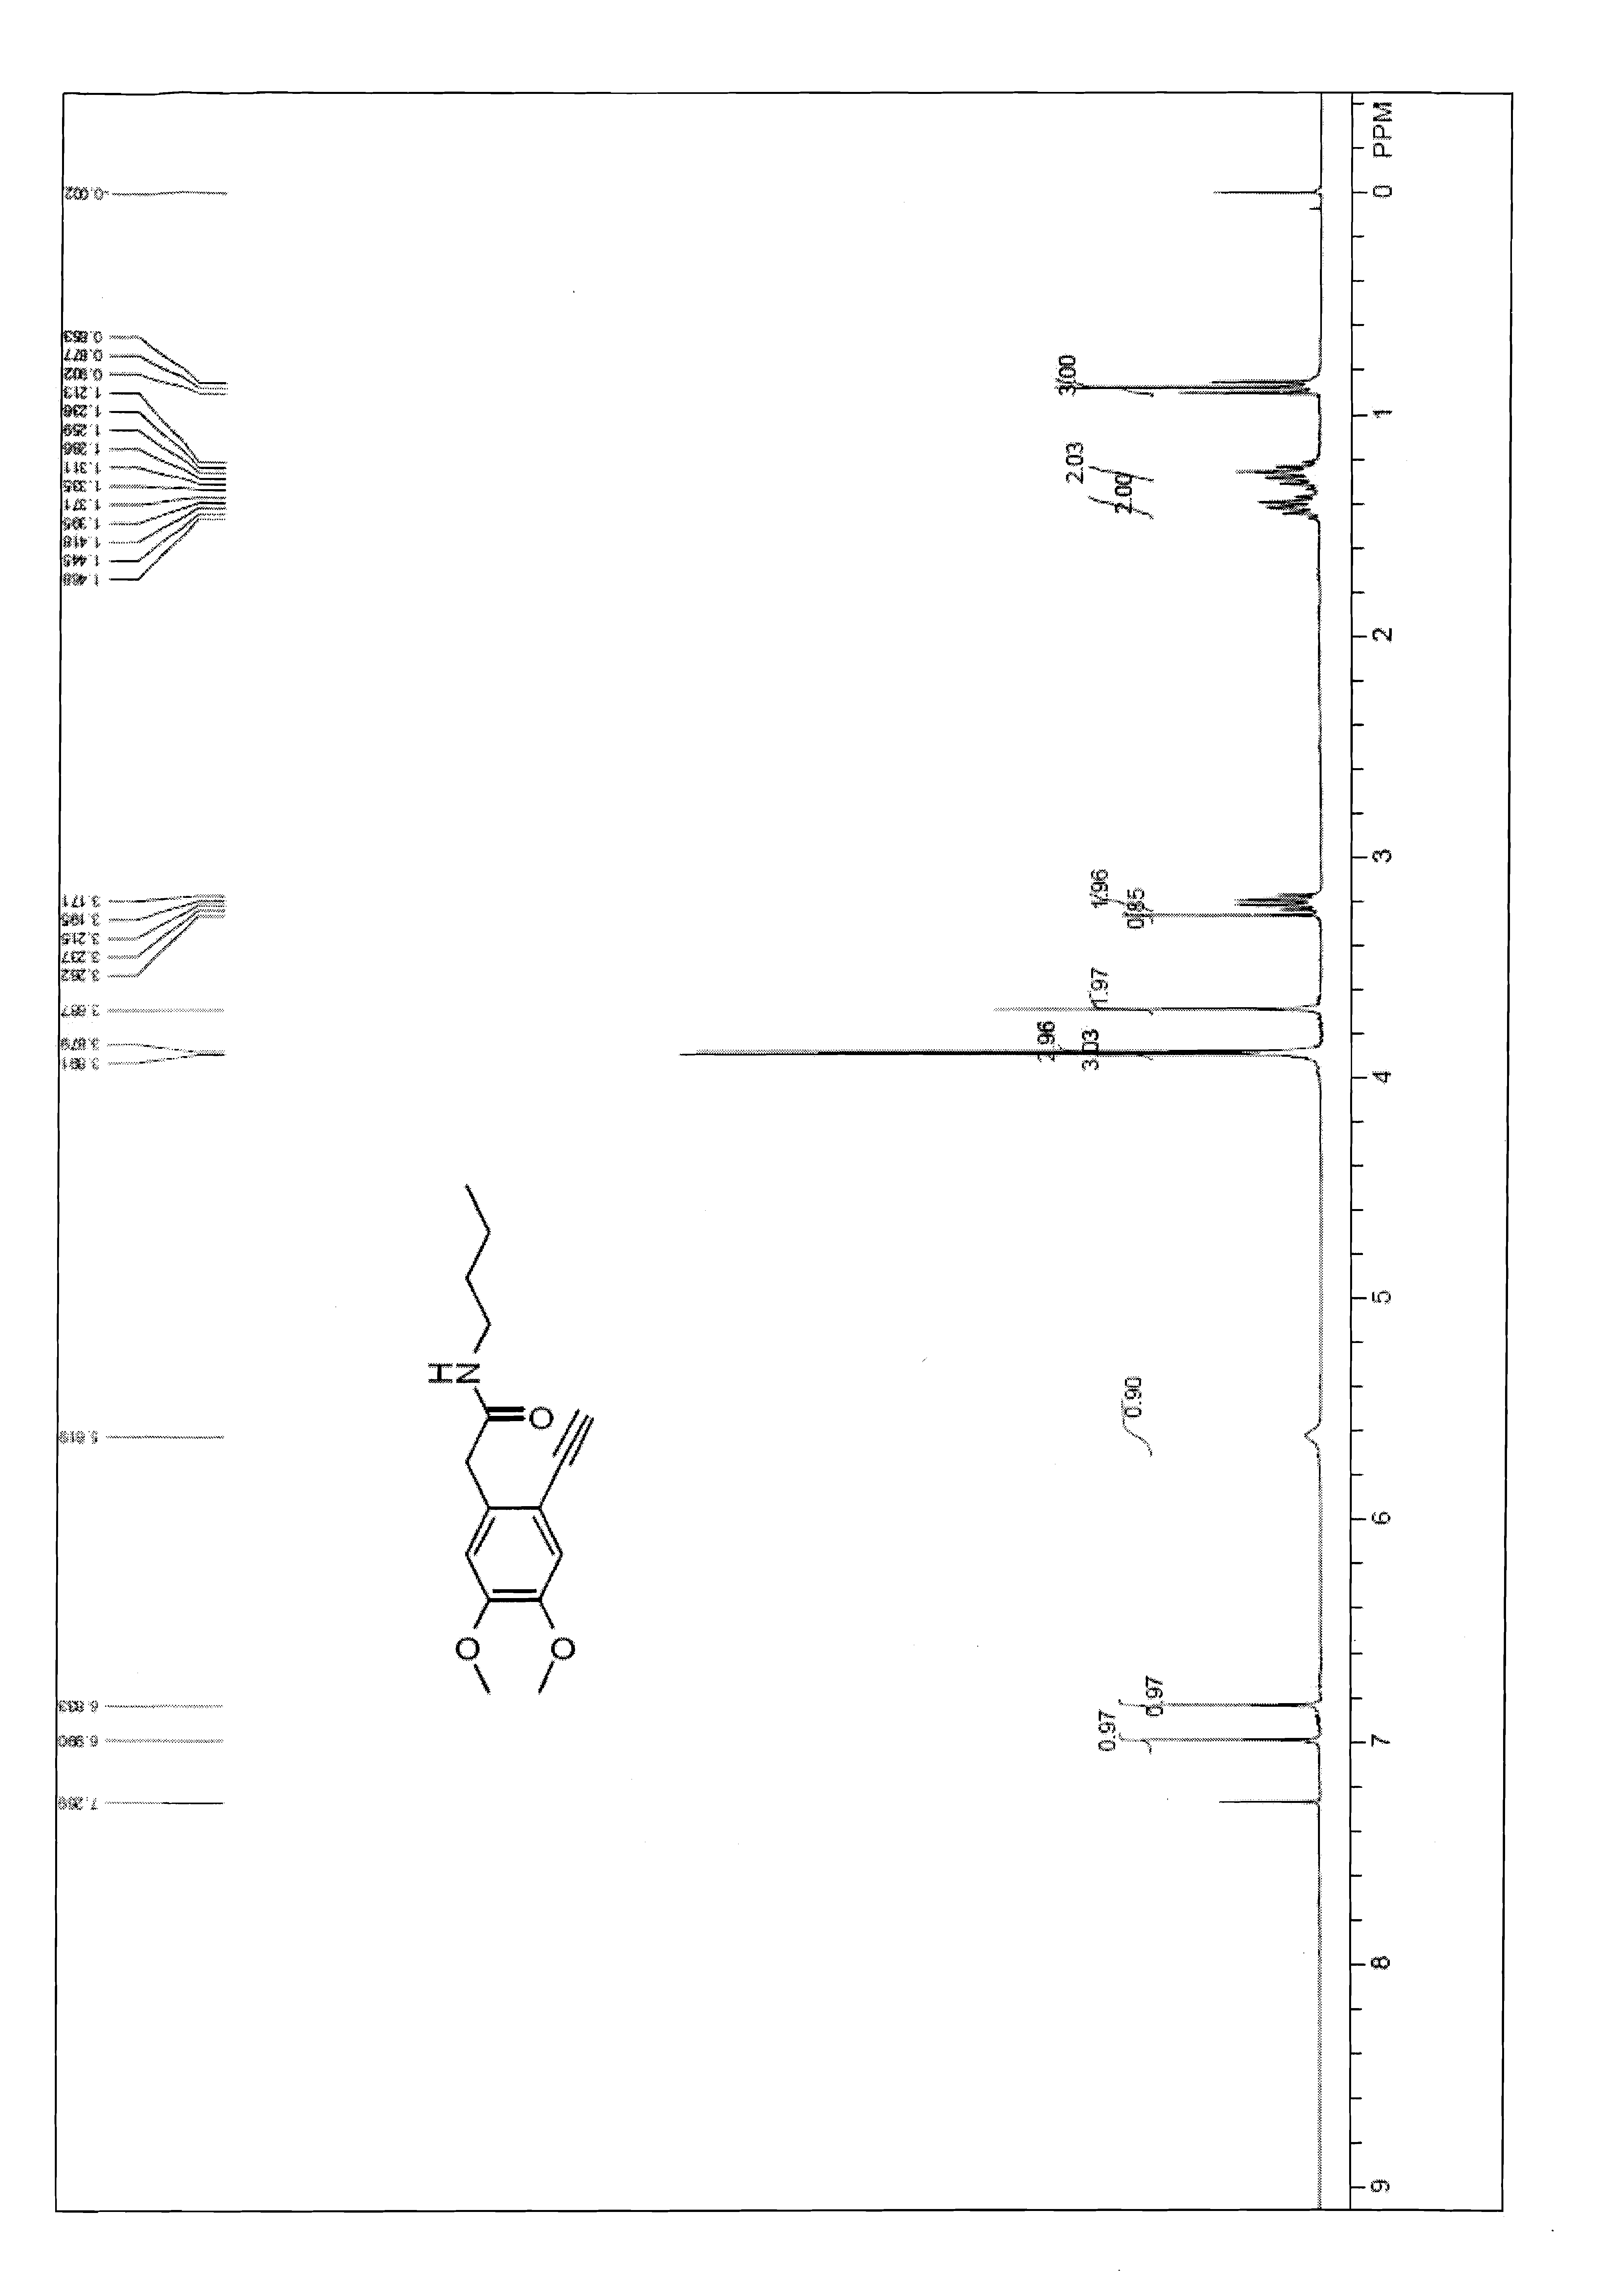


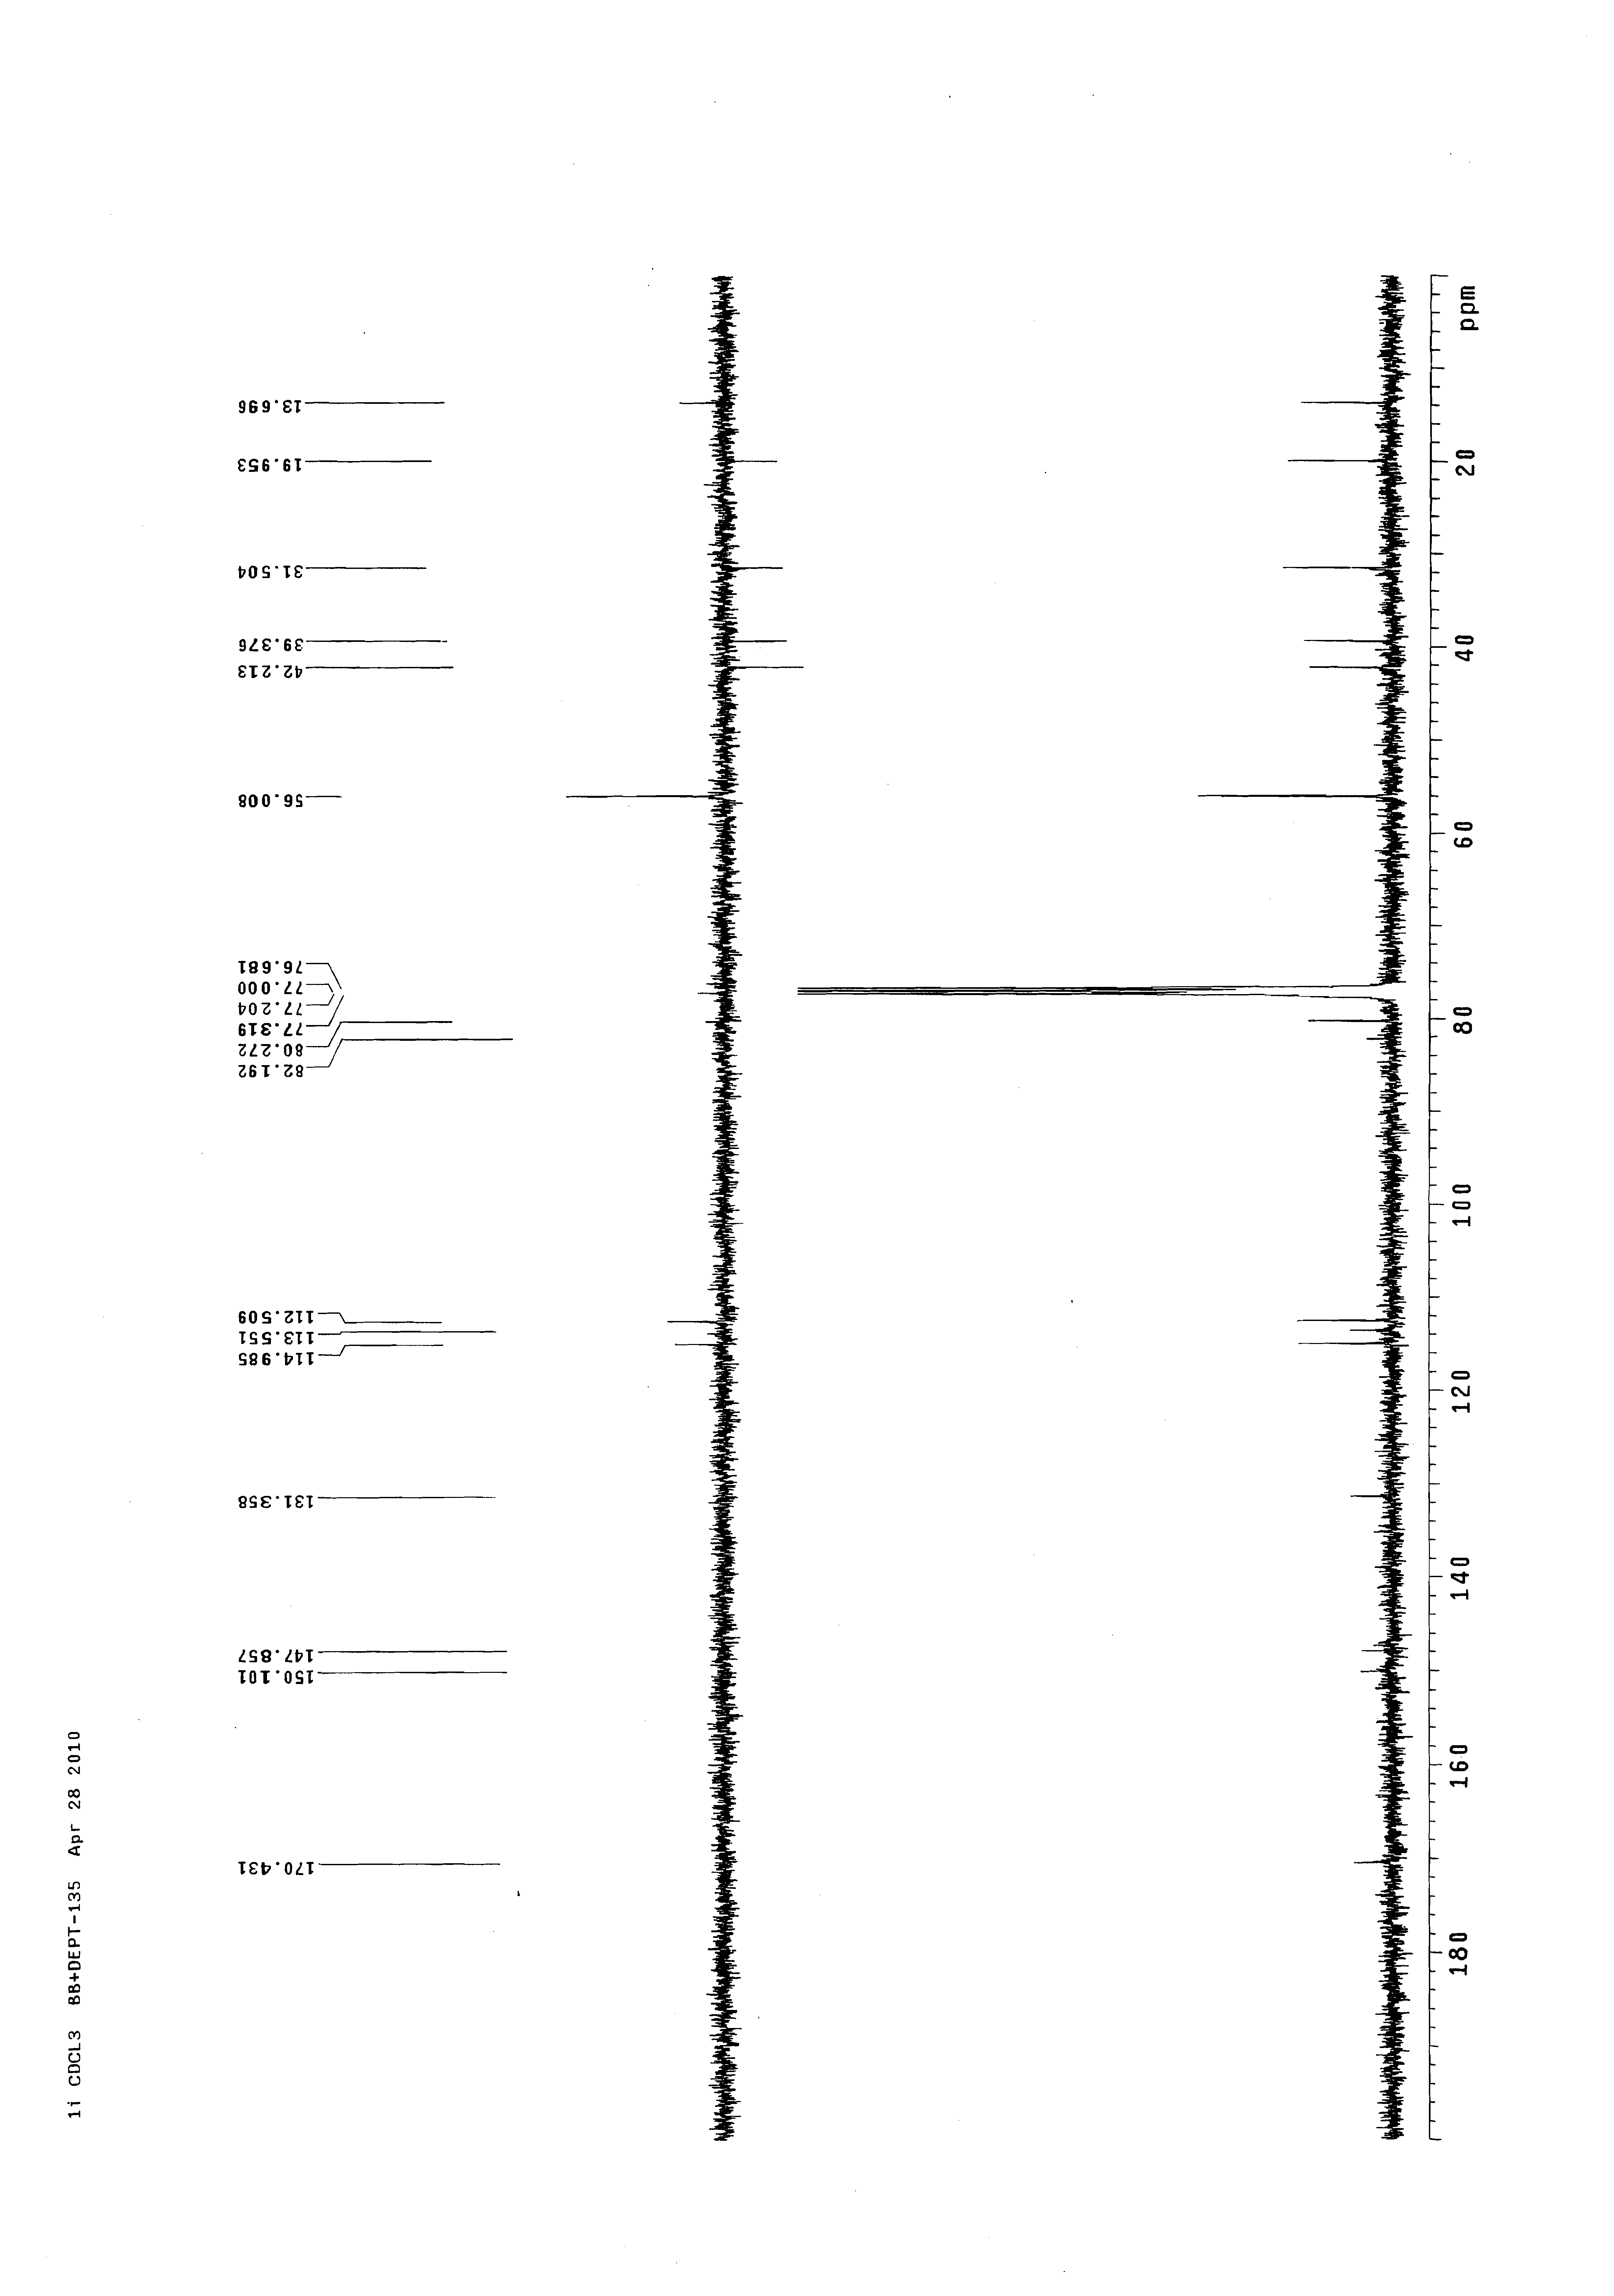


***N*-butyl-2-(2-ethynyl-5-methylphenyl)acetamide (1m)**

***
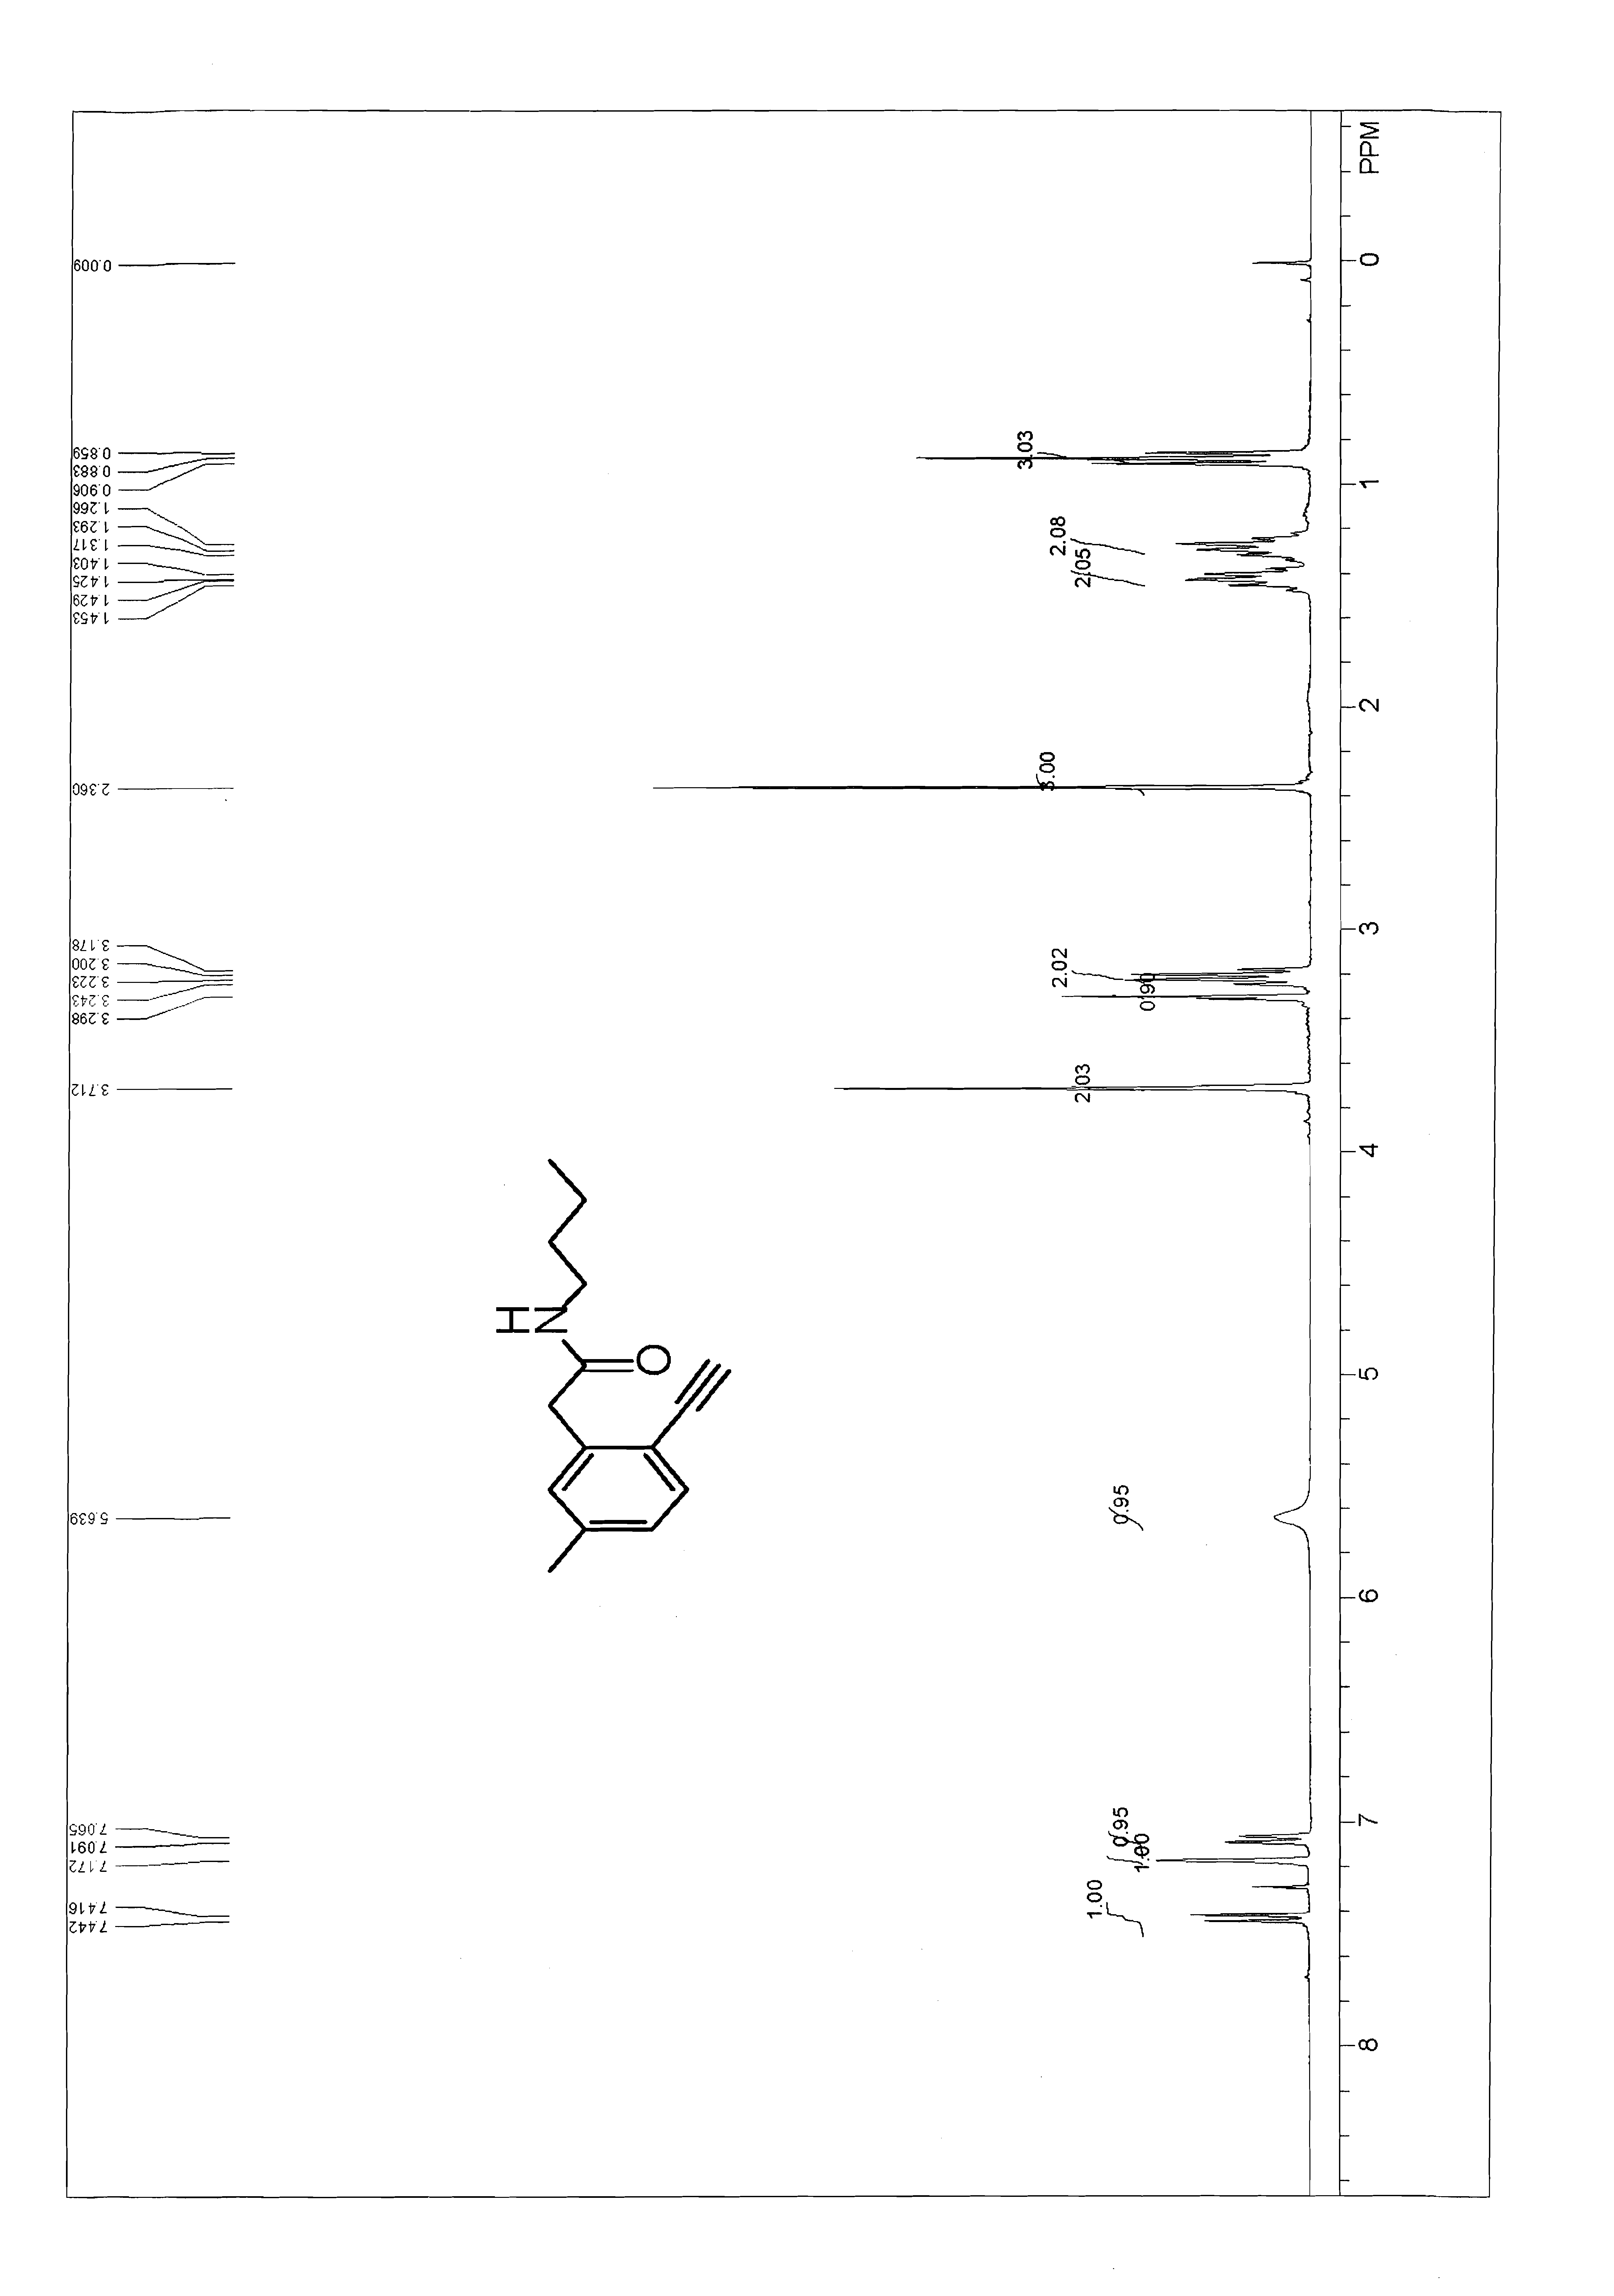
***

***
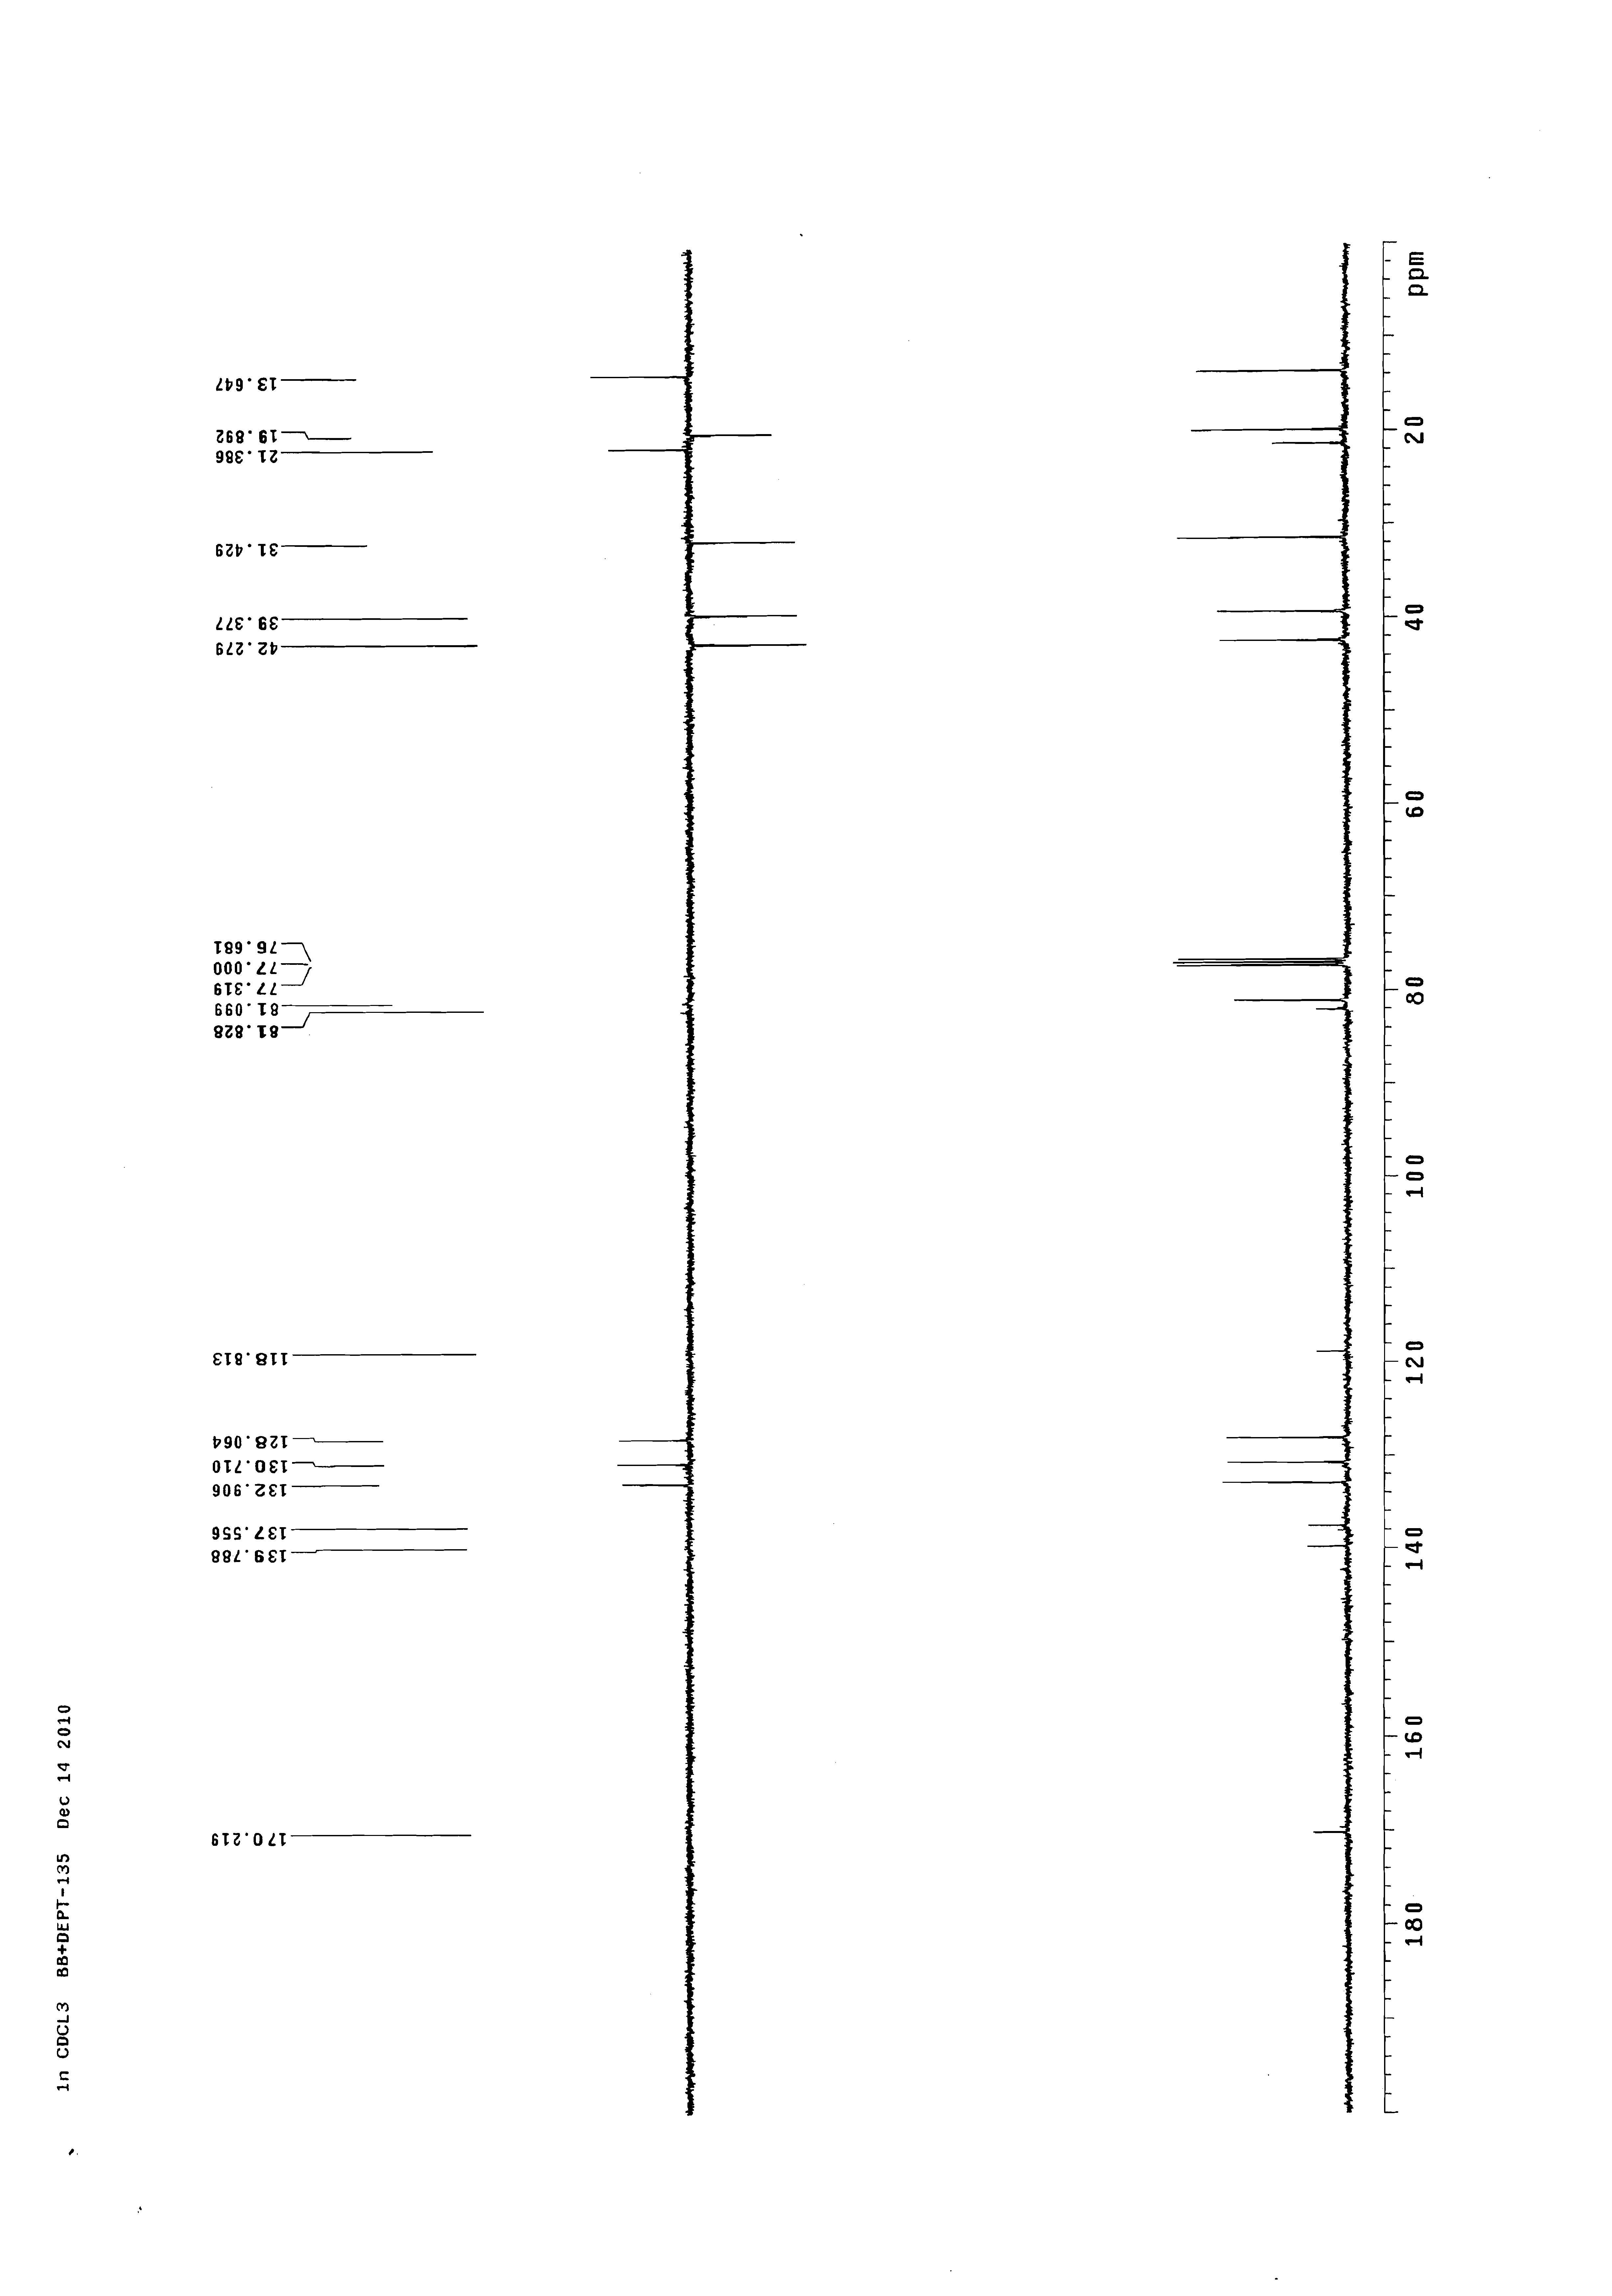
***

***N*-butyl-2-(2-ethynyl-4-(trifluoromethyl)phenyl)acetamide (1n)**


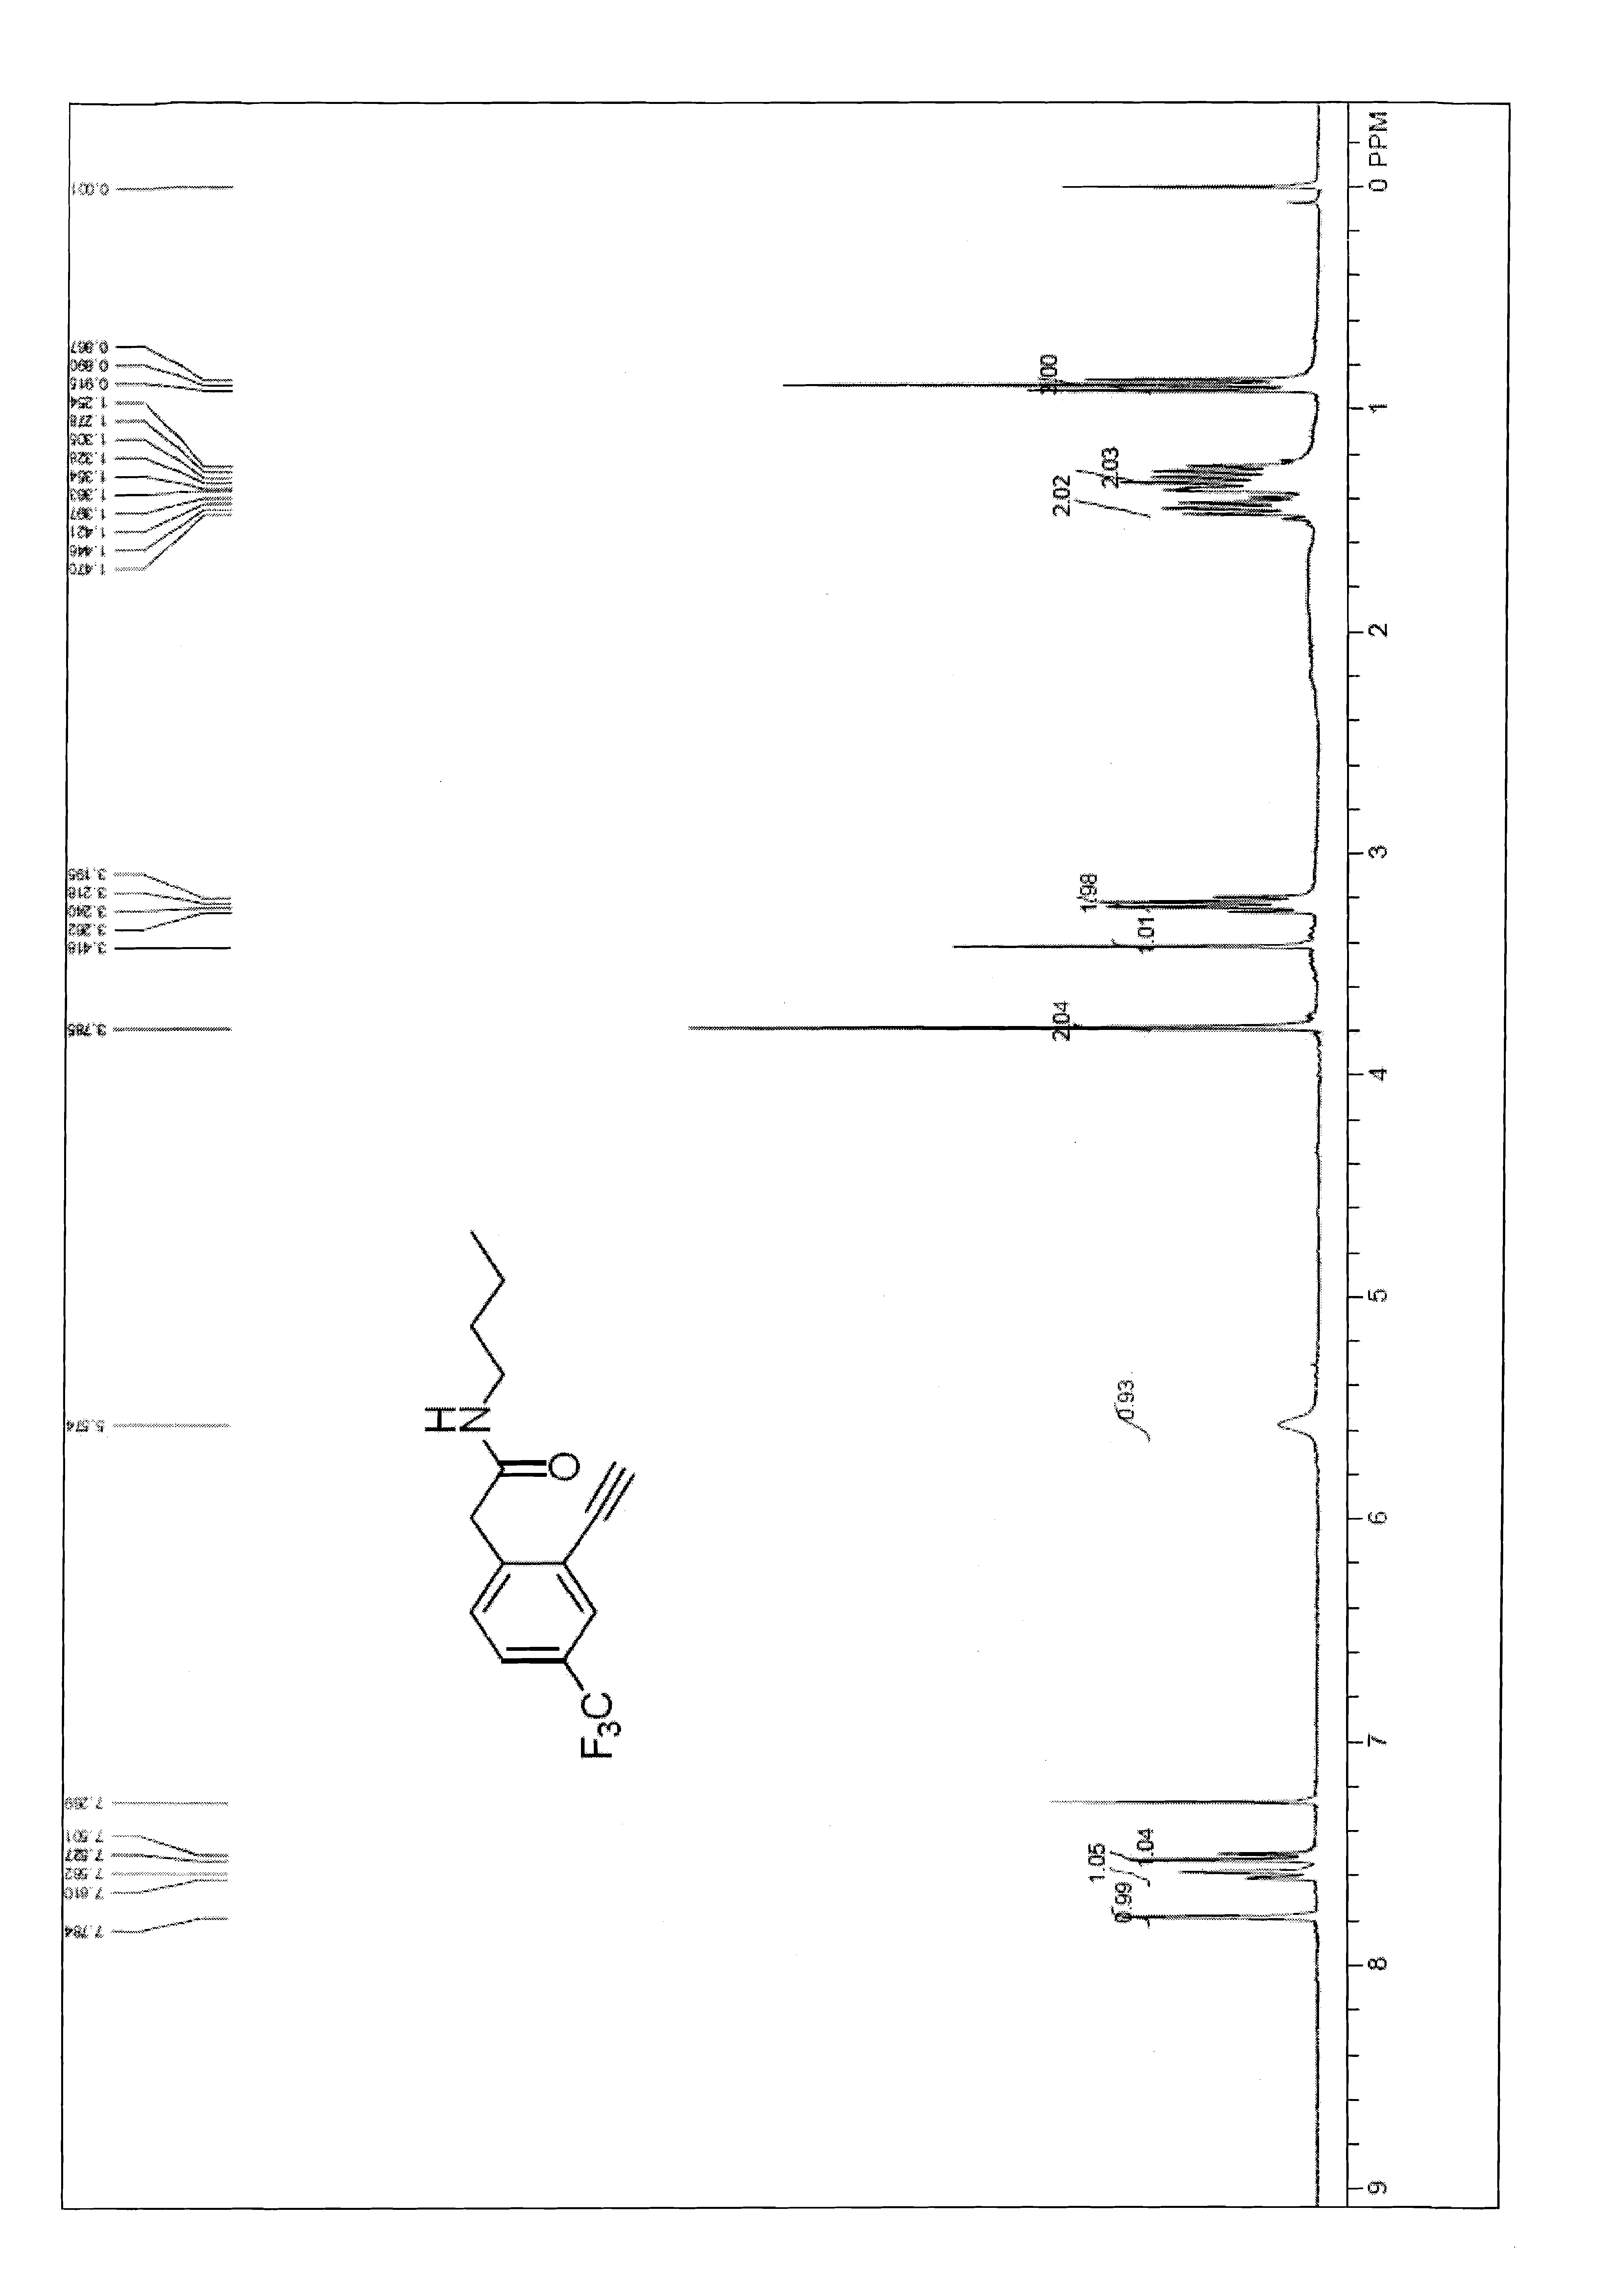


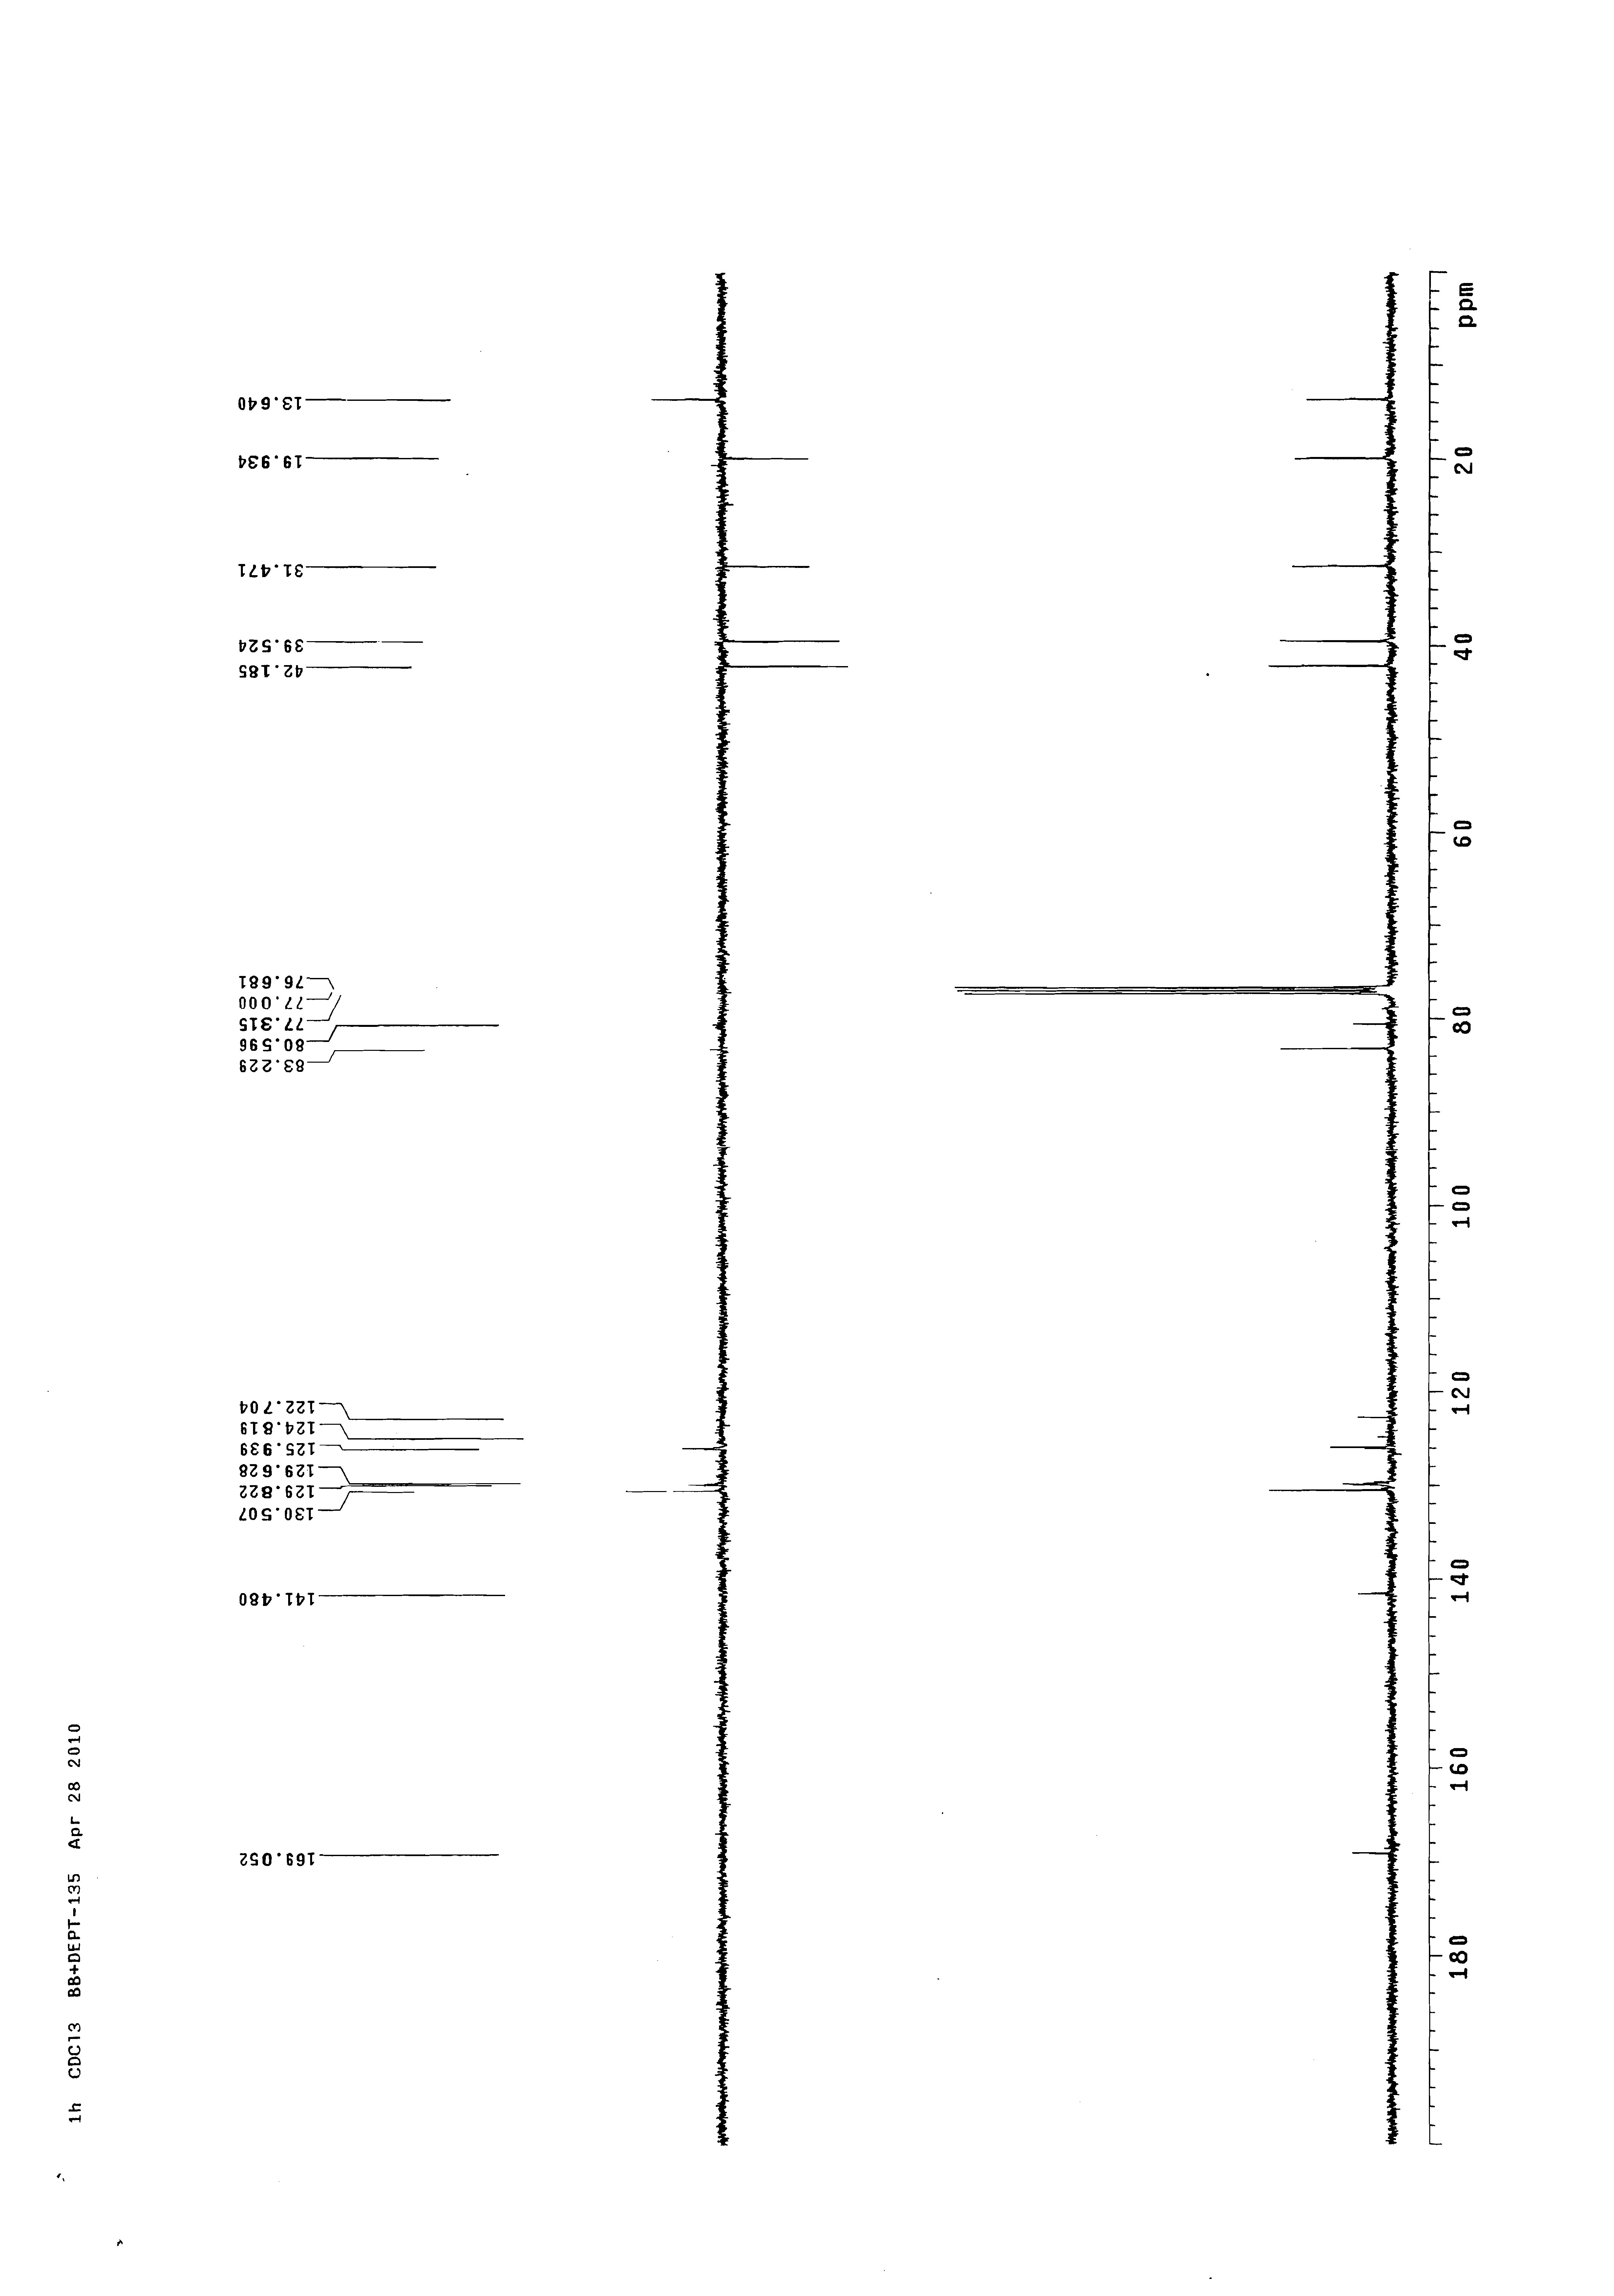


***N*-butyl-2-(4-chloro-2-ethynylphenyl)acetamide (1o)**

**
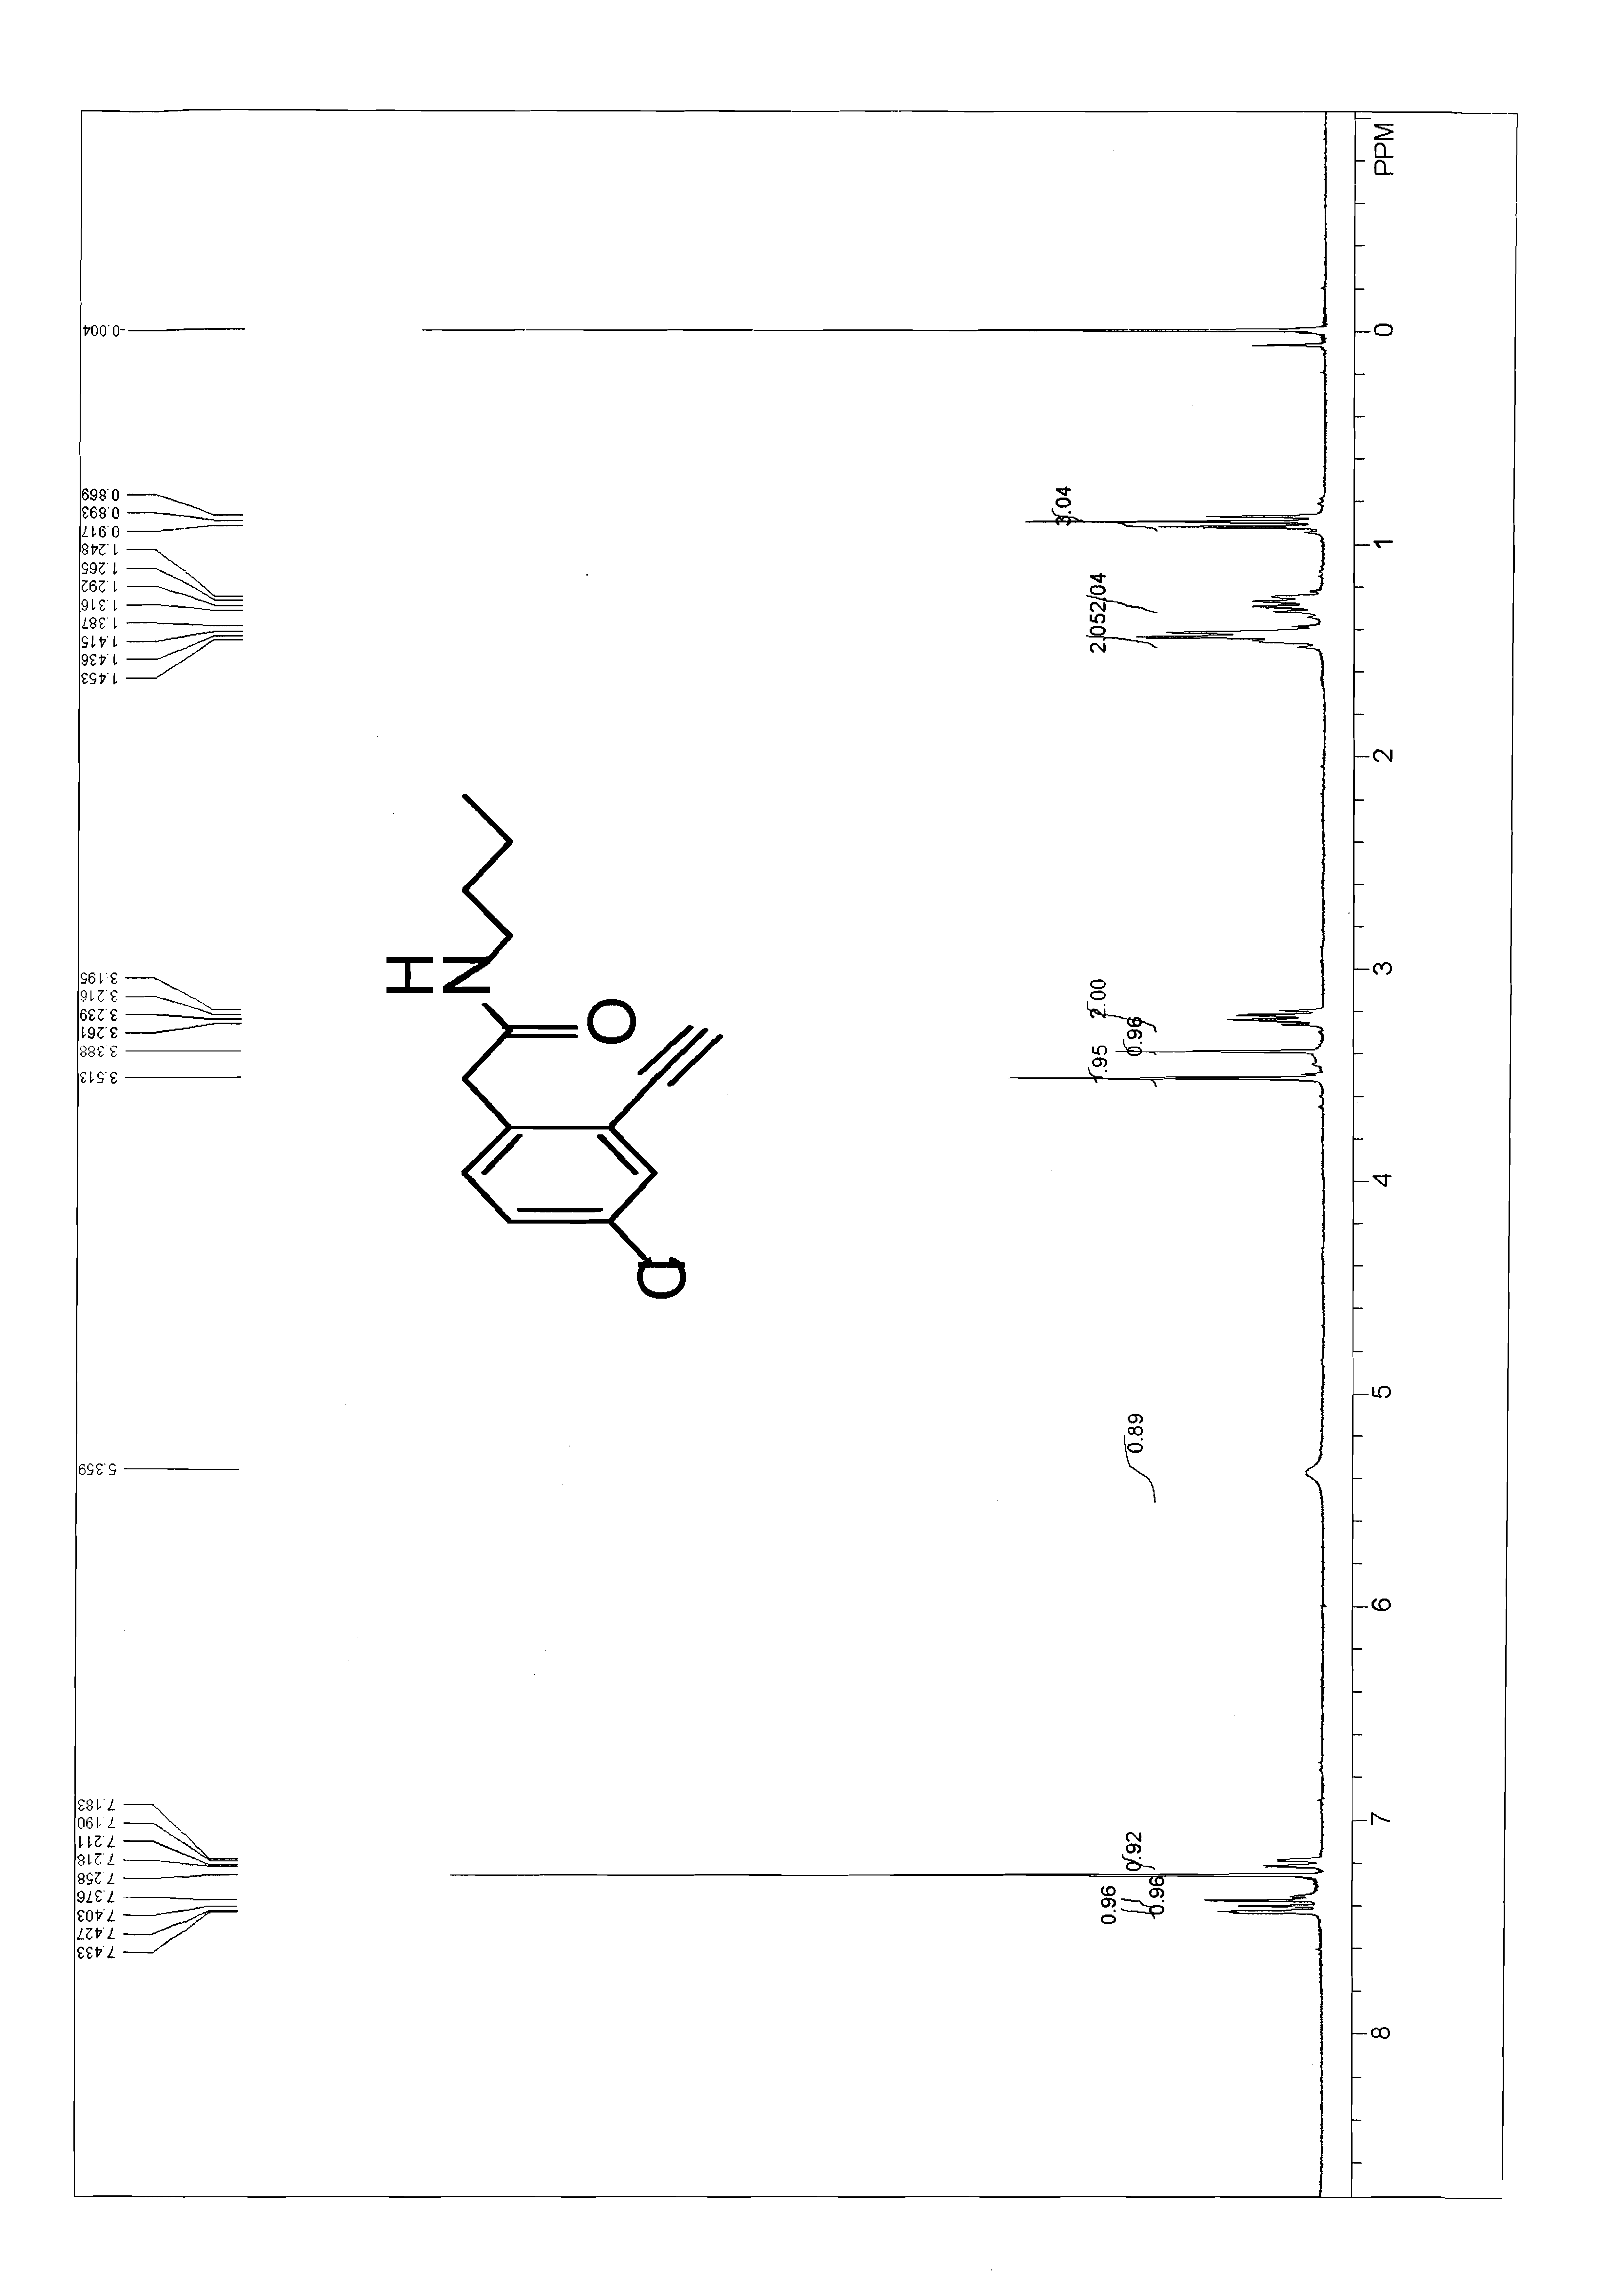
**

**
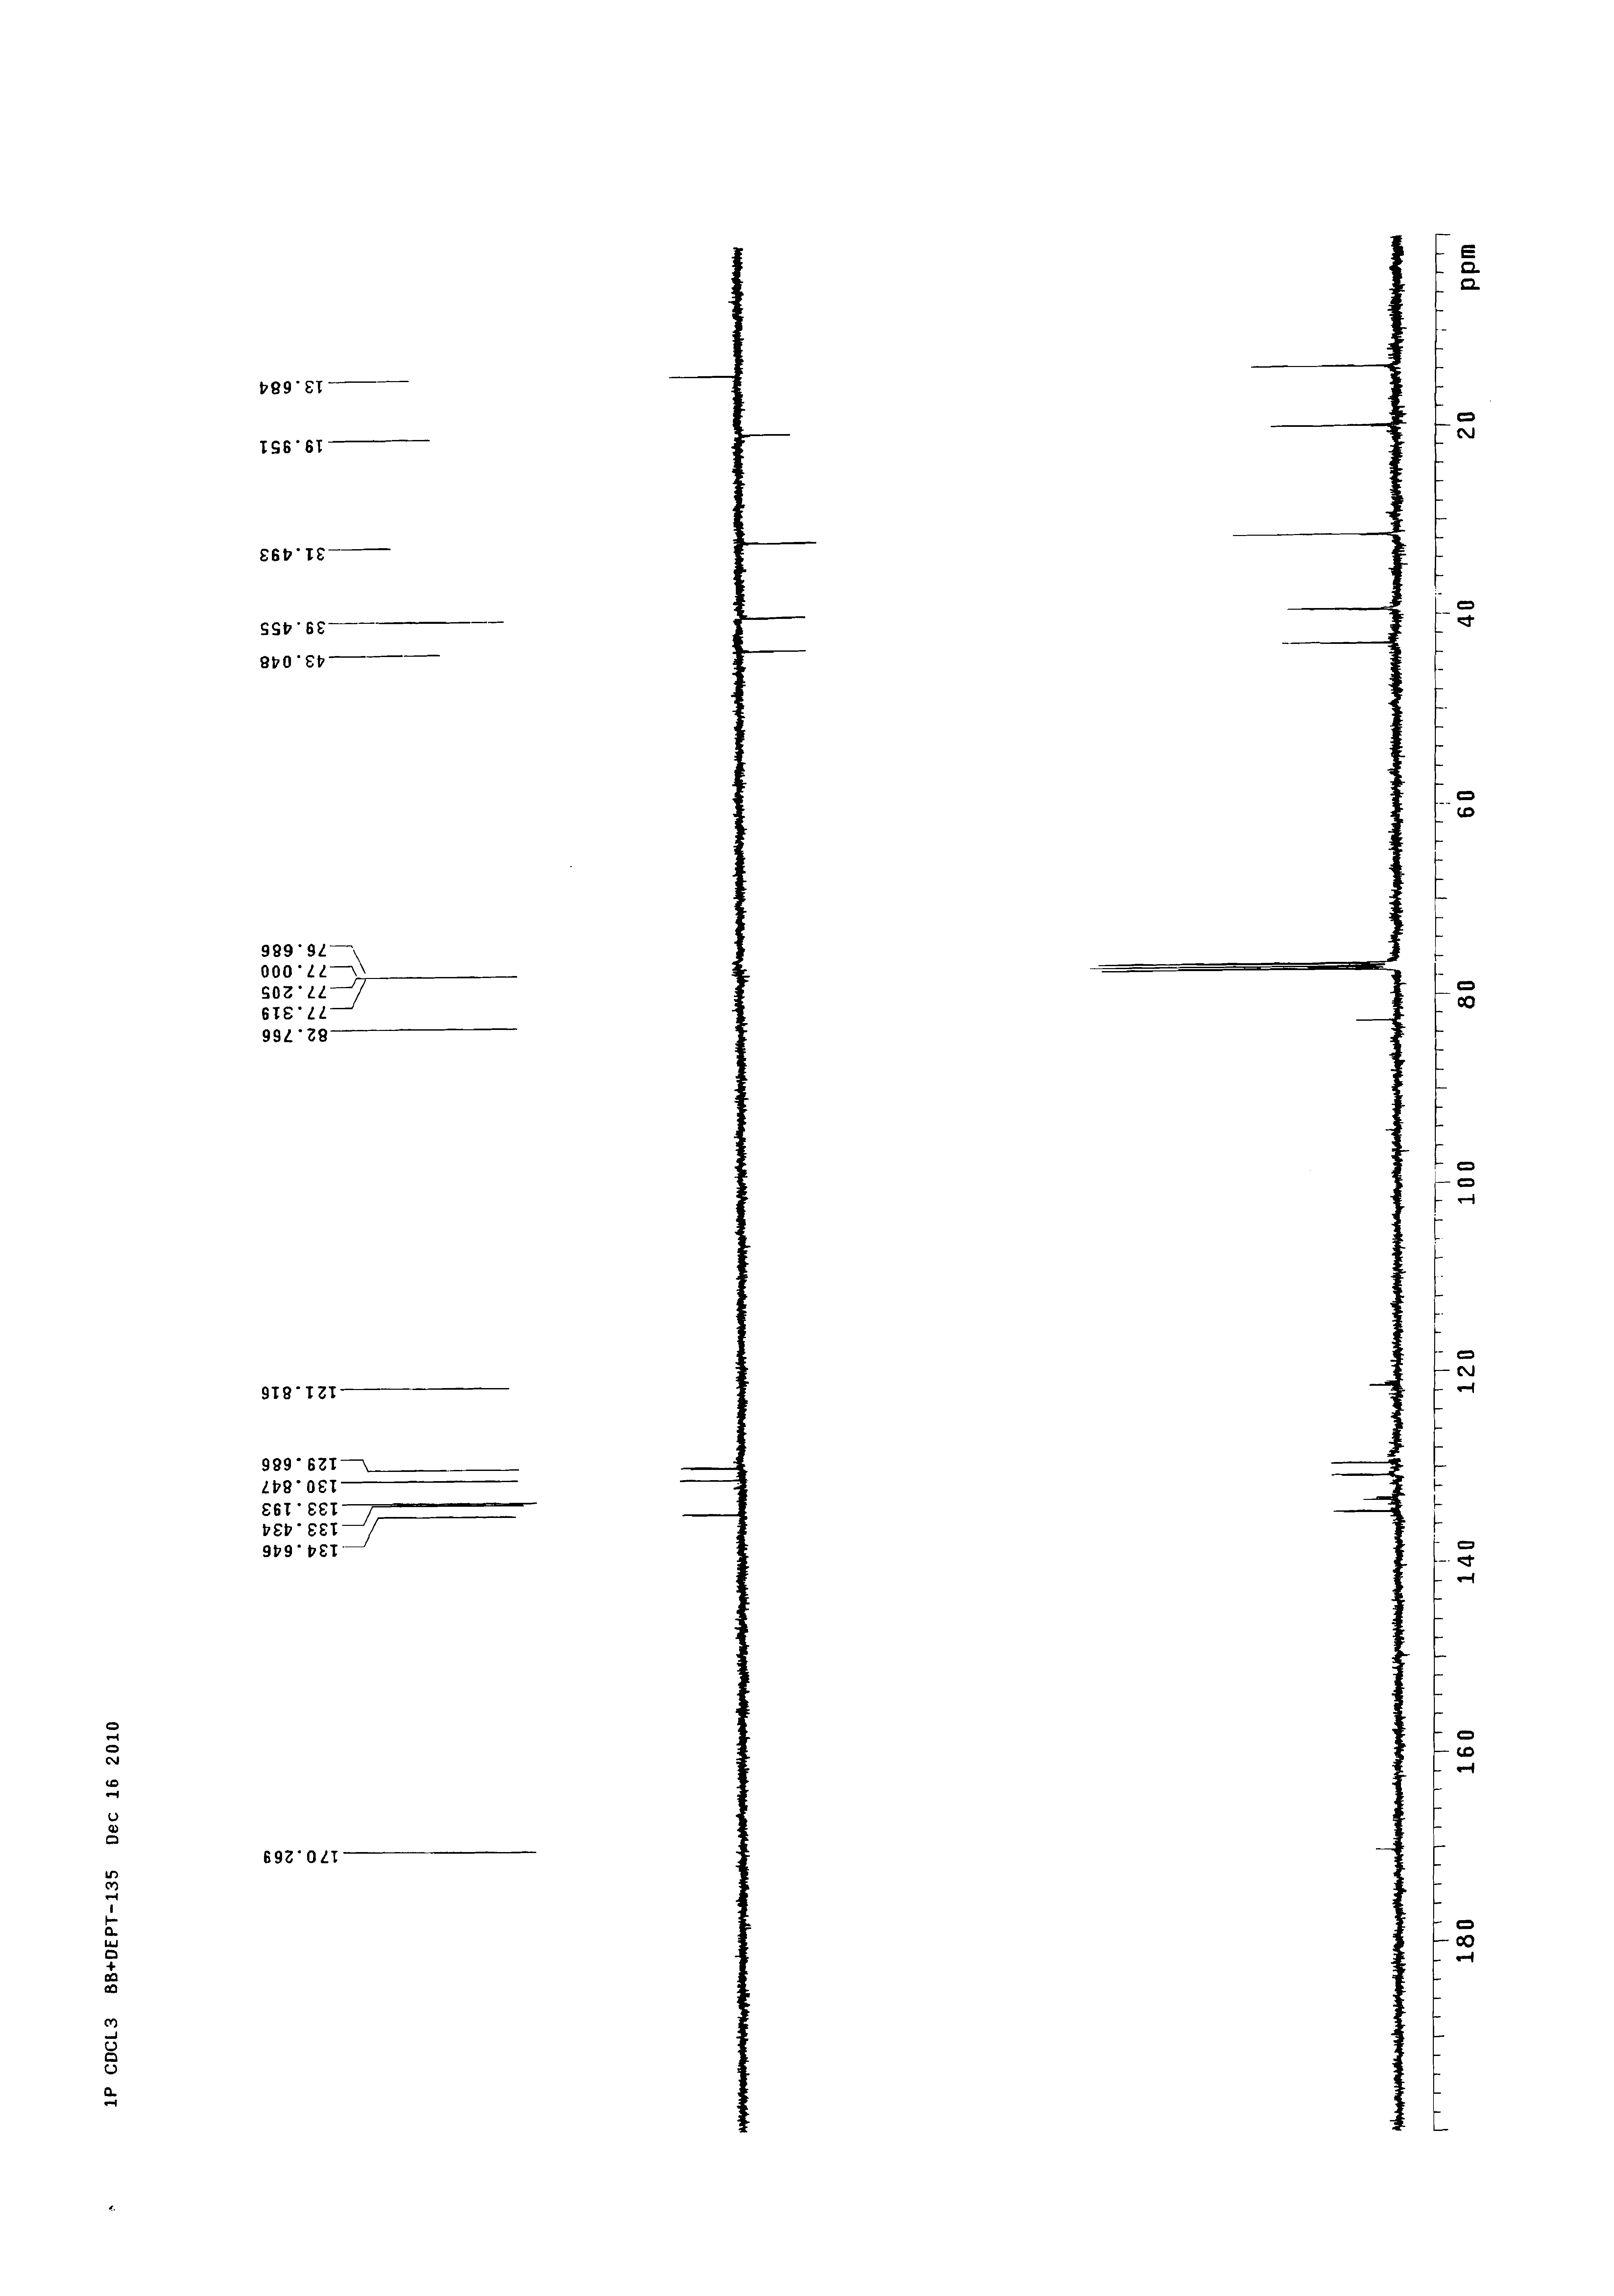
**

**1H and 13C-NMR spectra of products (compounds 2)**

***N*-butyl-2-(2-(2-(butylamino)-2-oxoethyl)phenyl)-4-methyl-1-naphthamide (2a)**


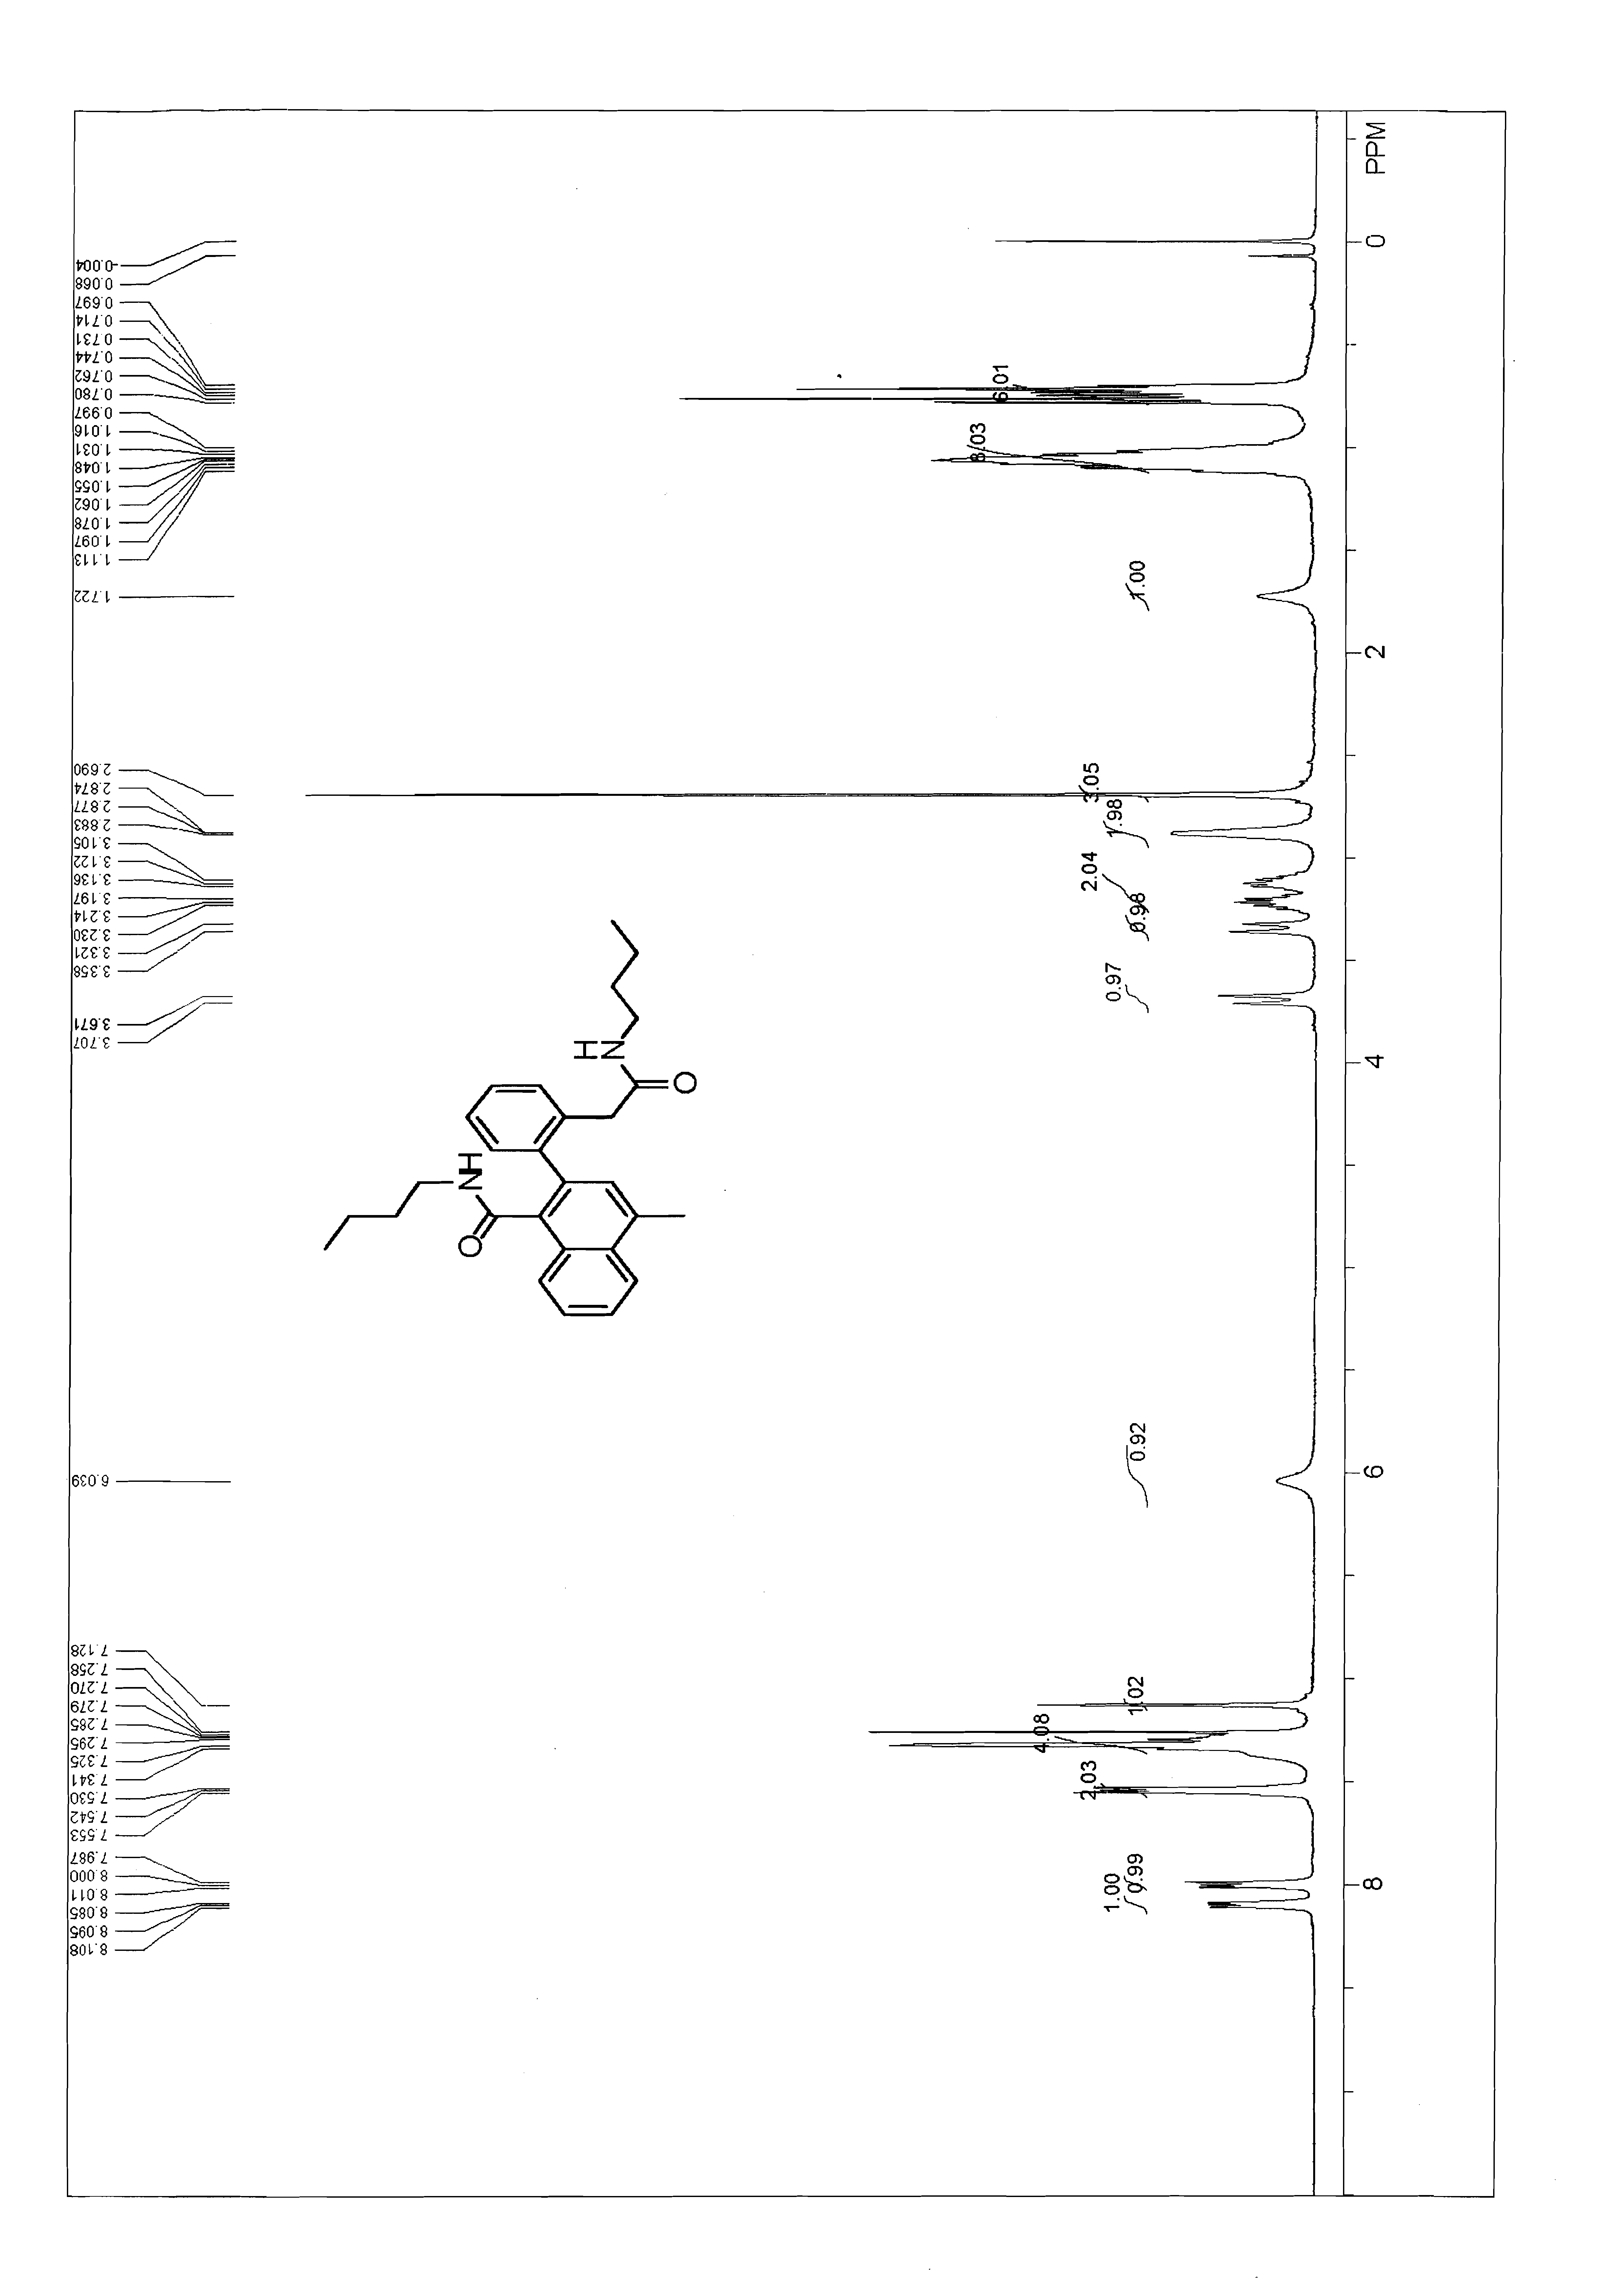


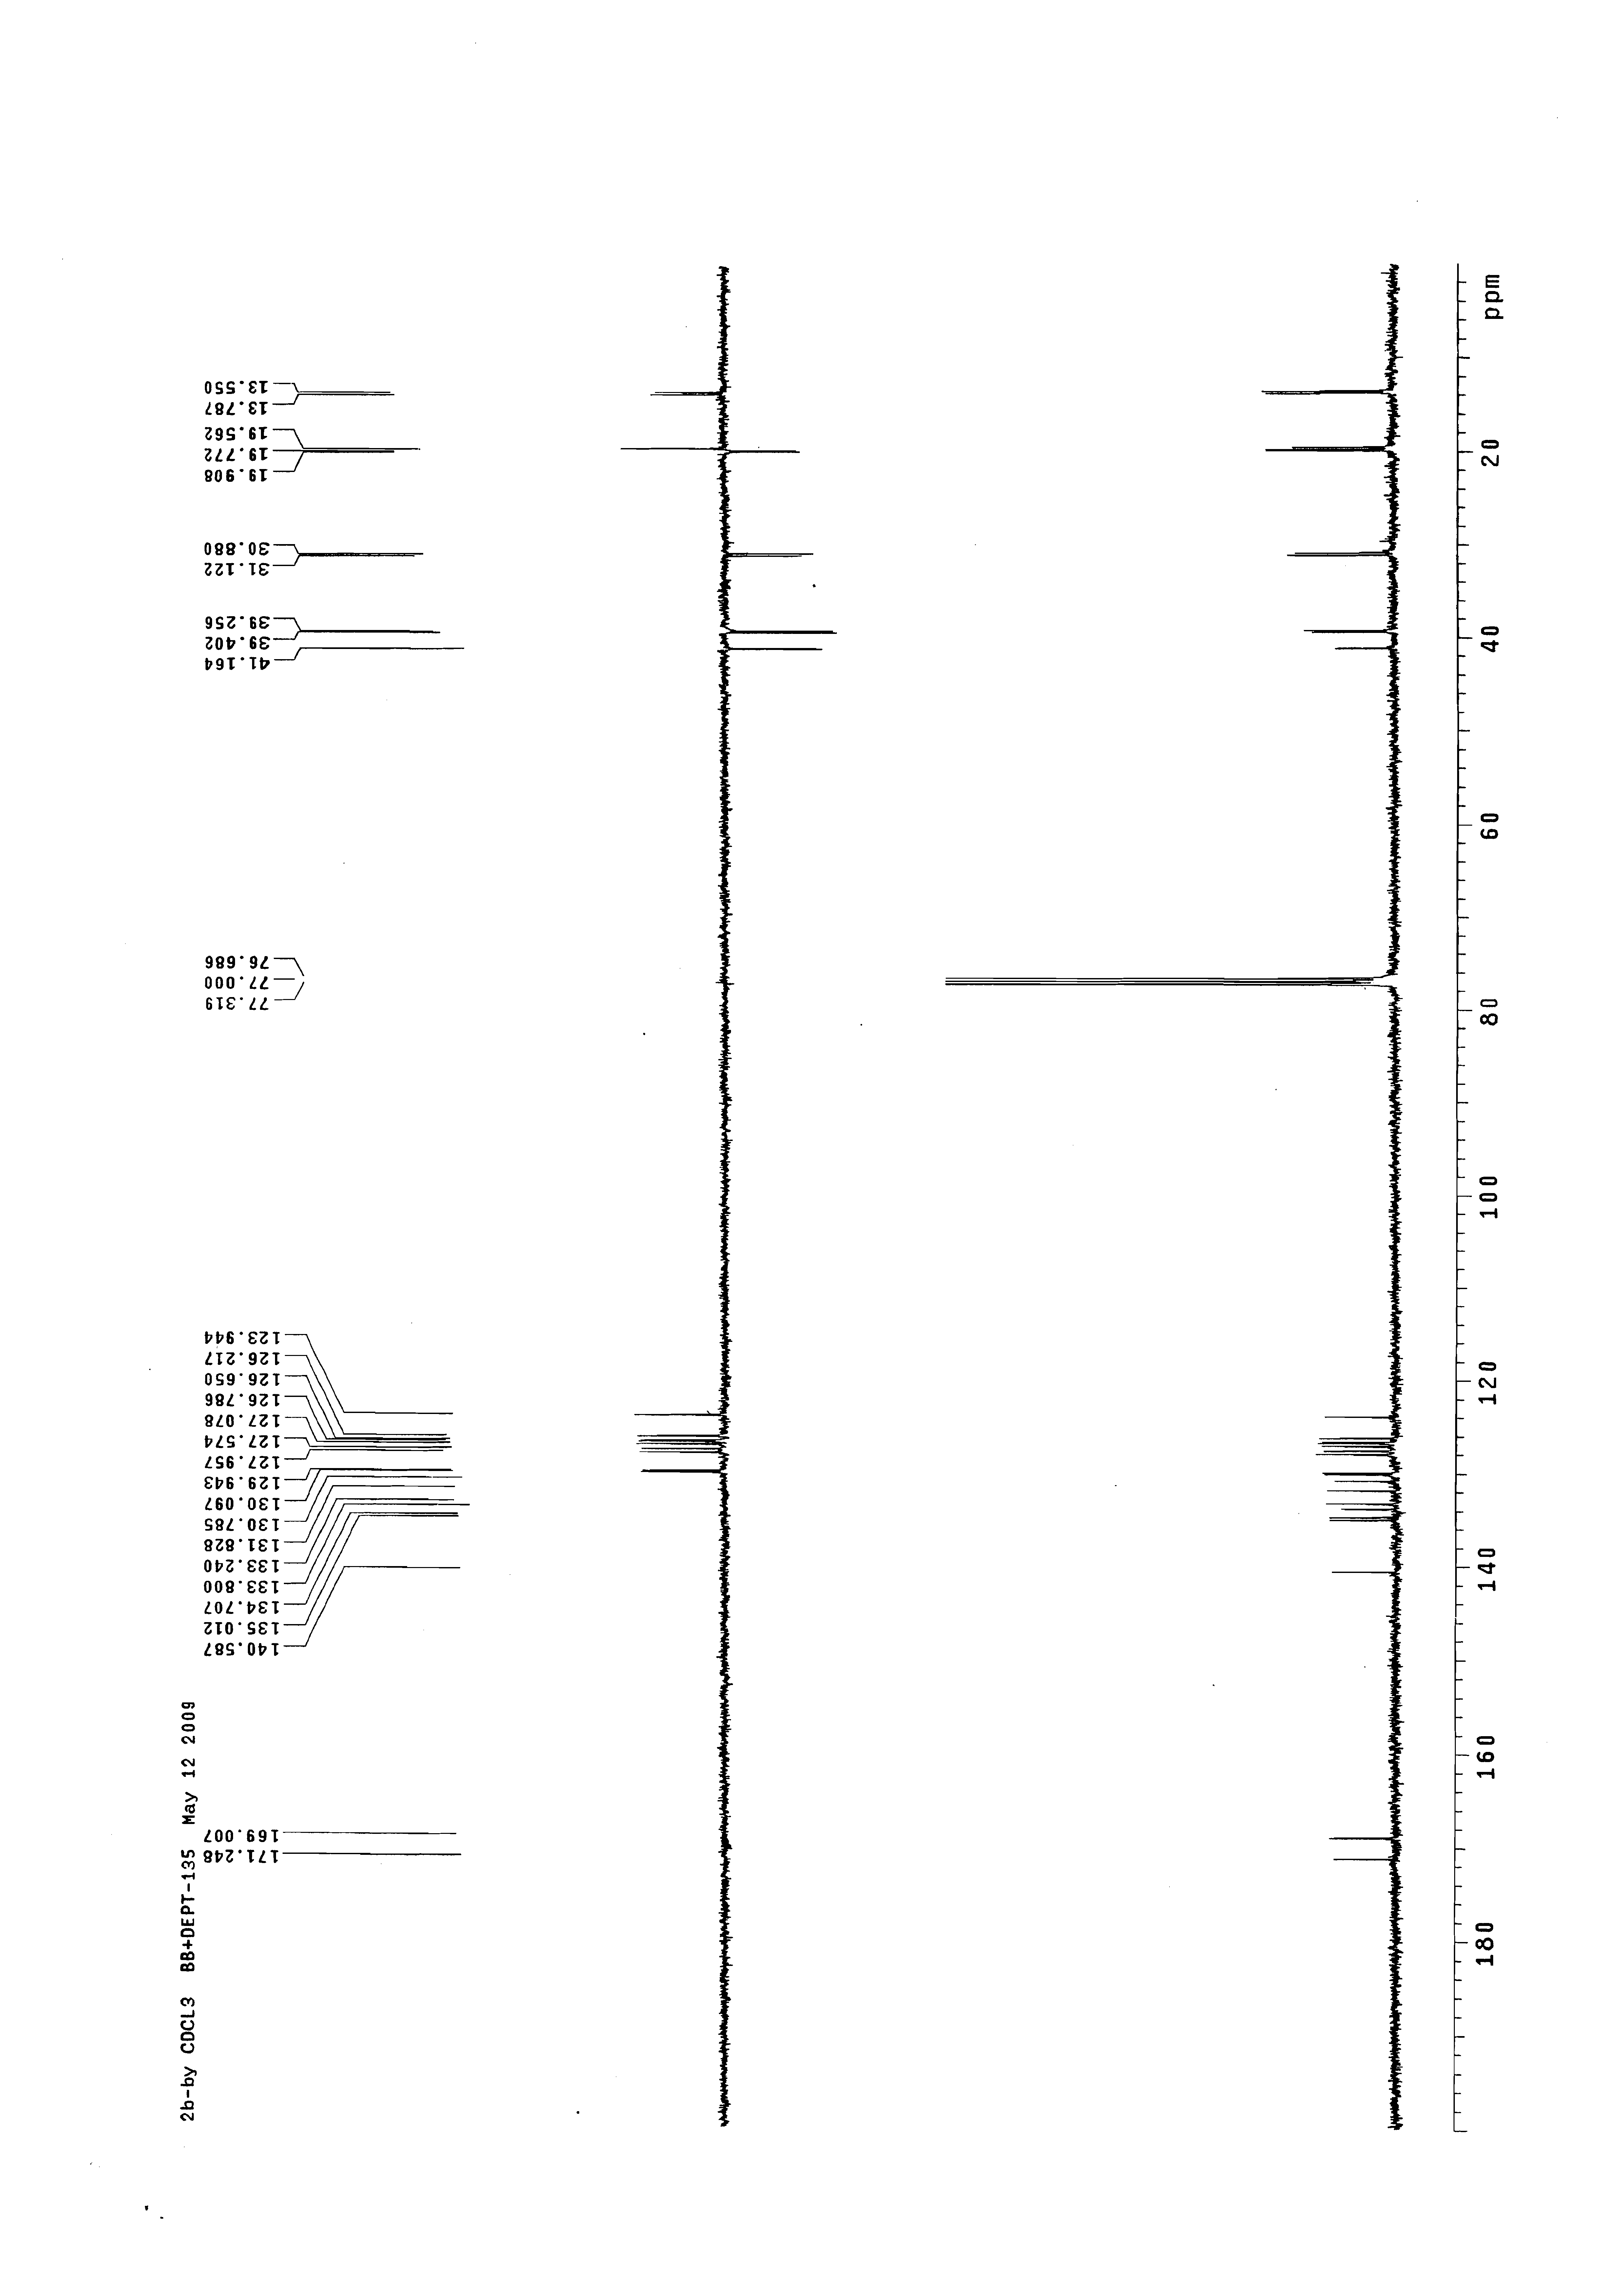


**2-(2-(2-amino-2-oxoethyl)phenyl)-4-methyl-1-naphthamide (2b)**

**
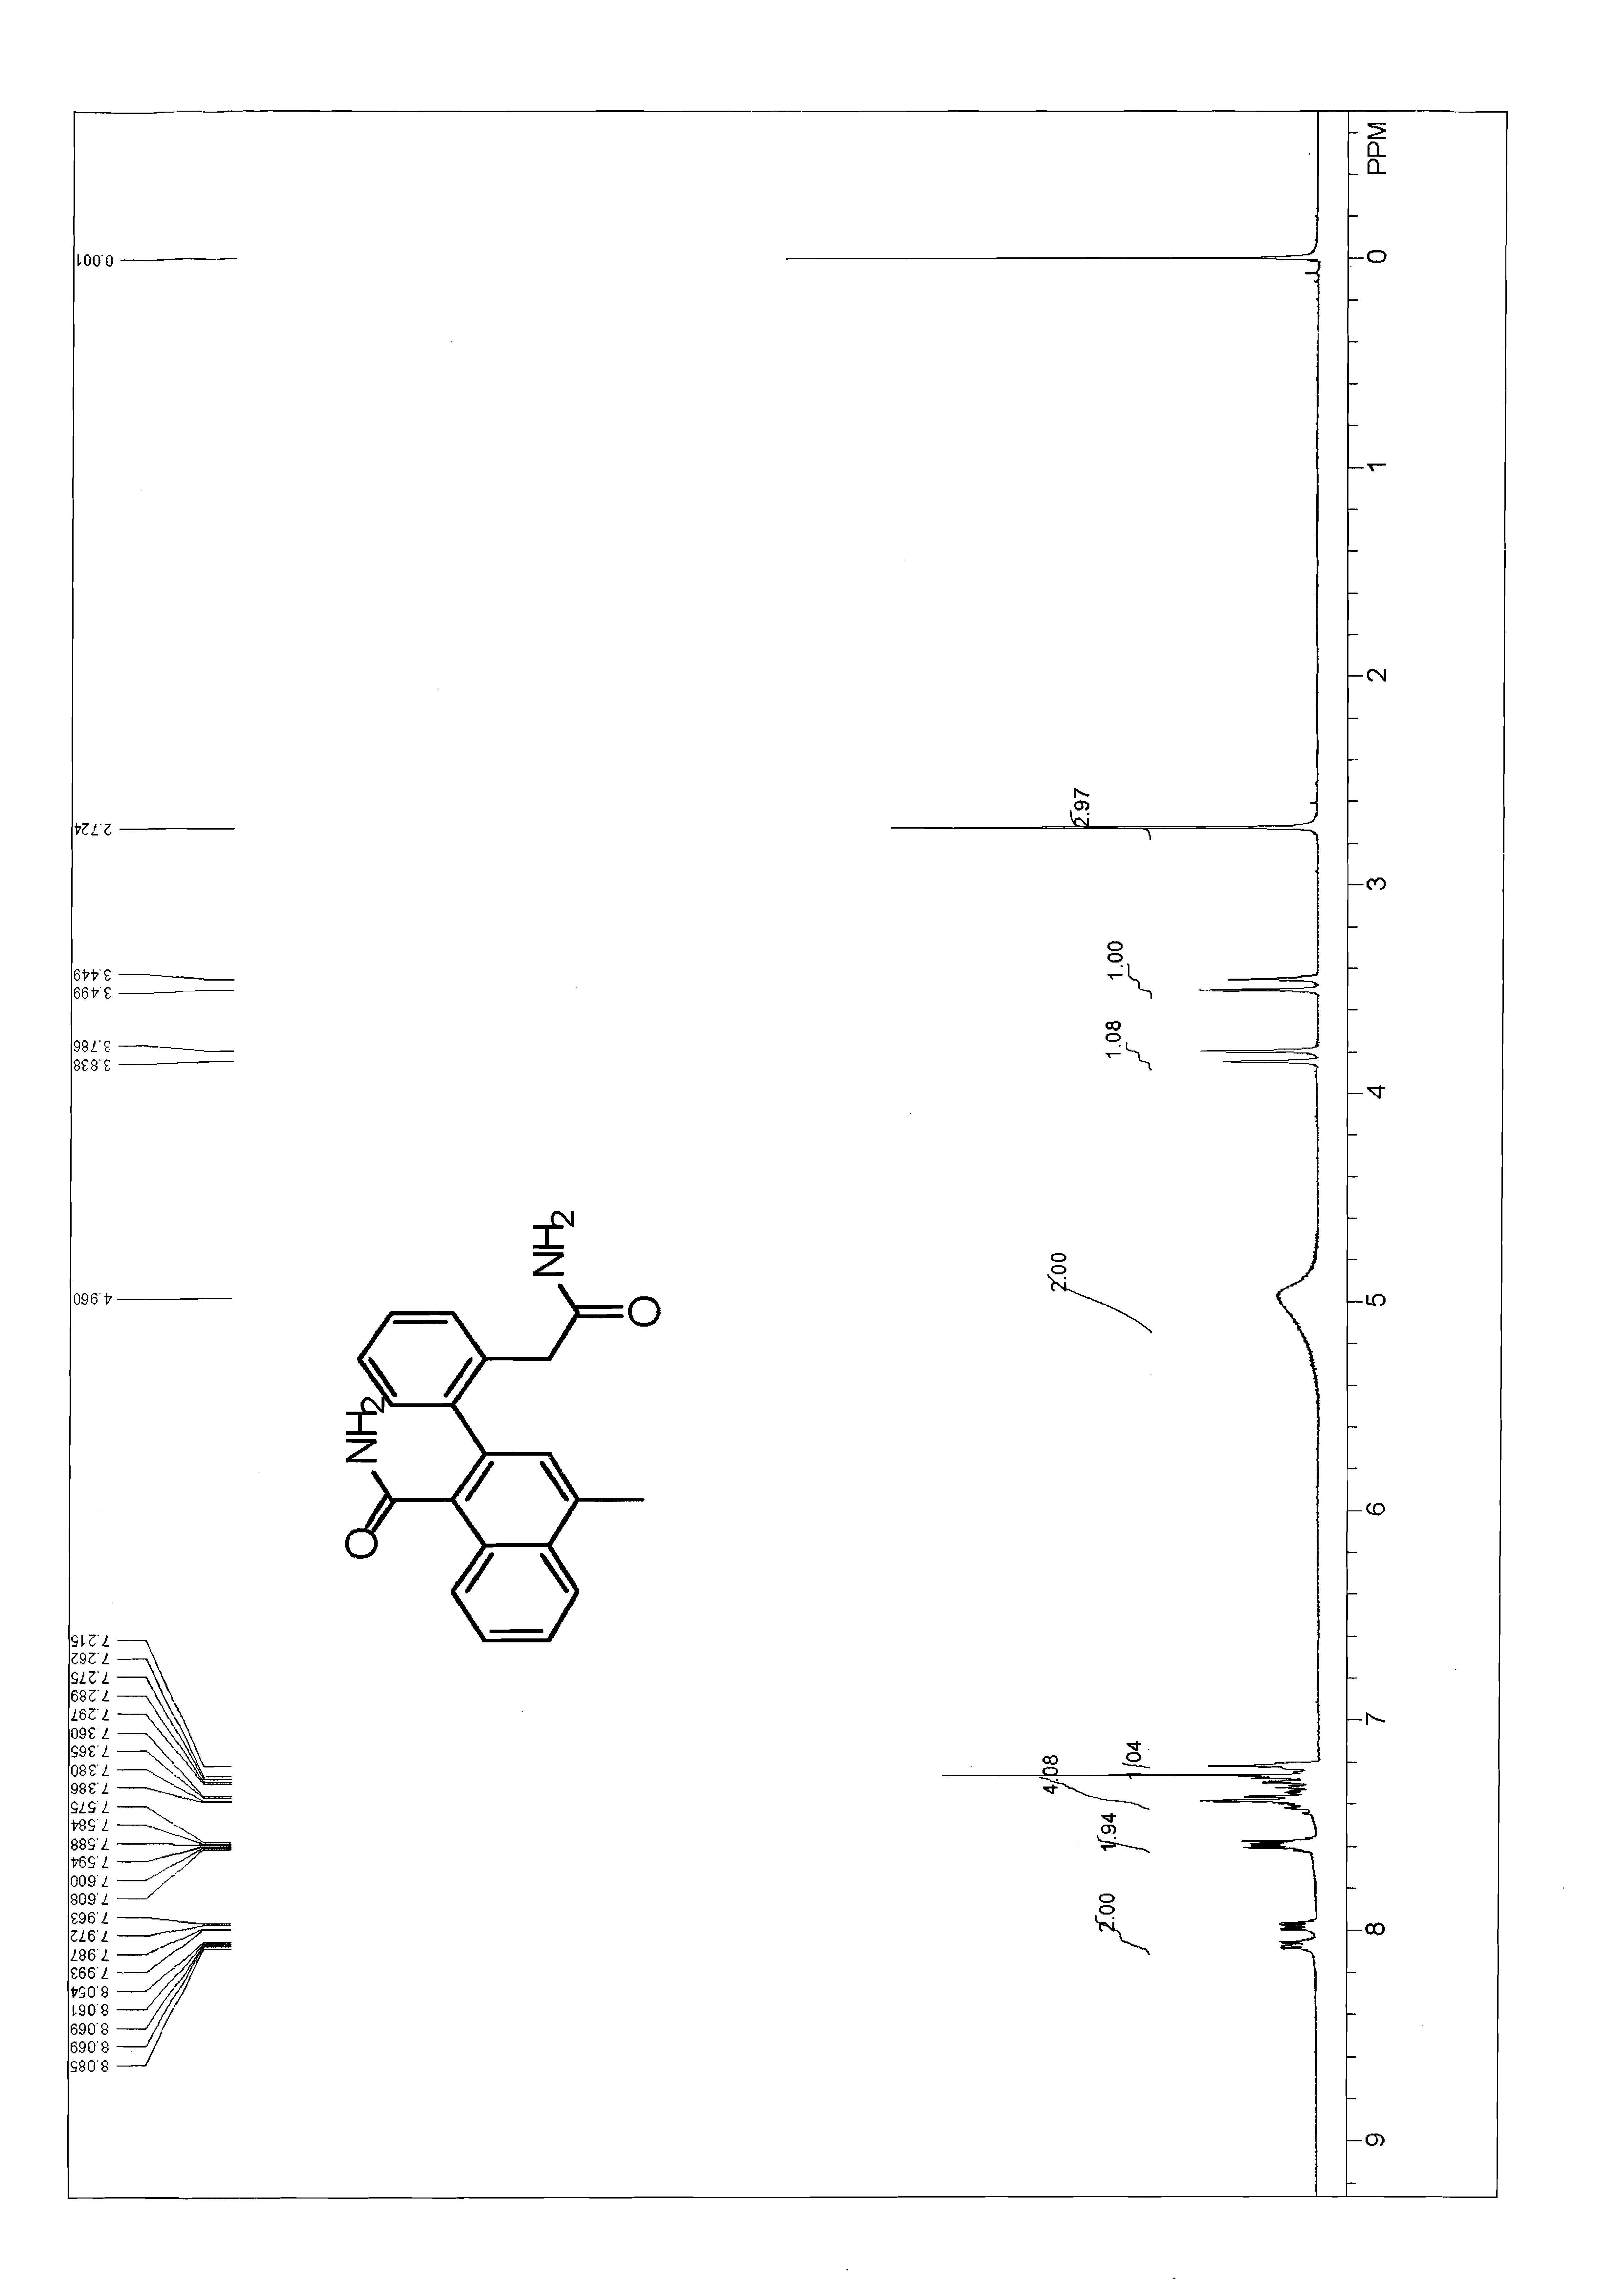
**

**
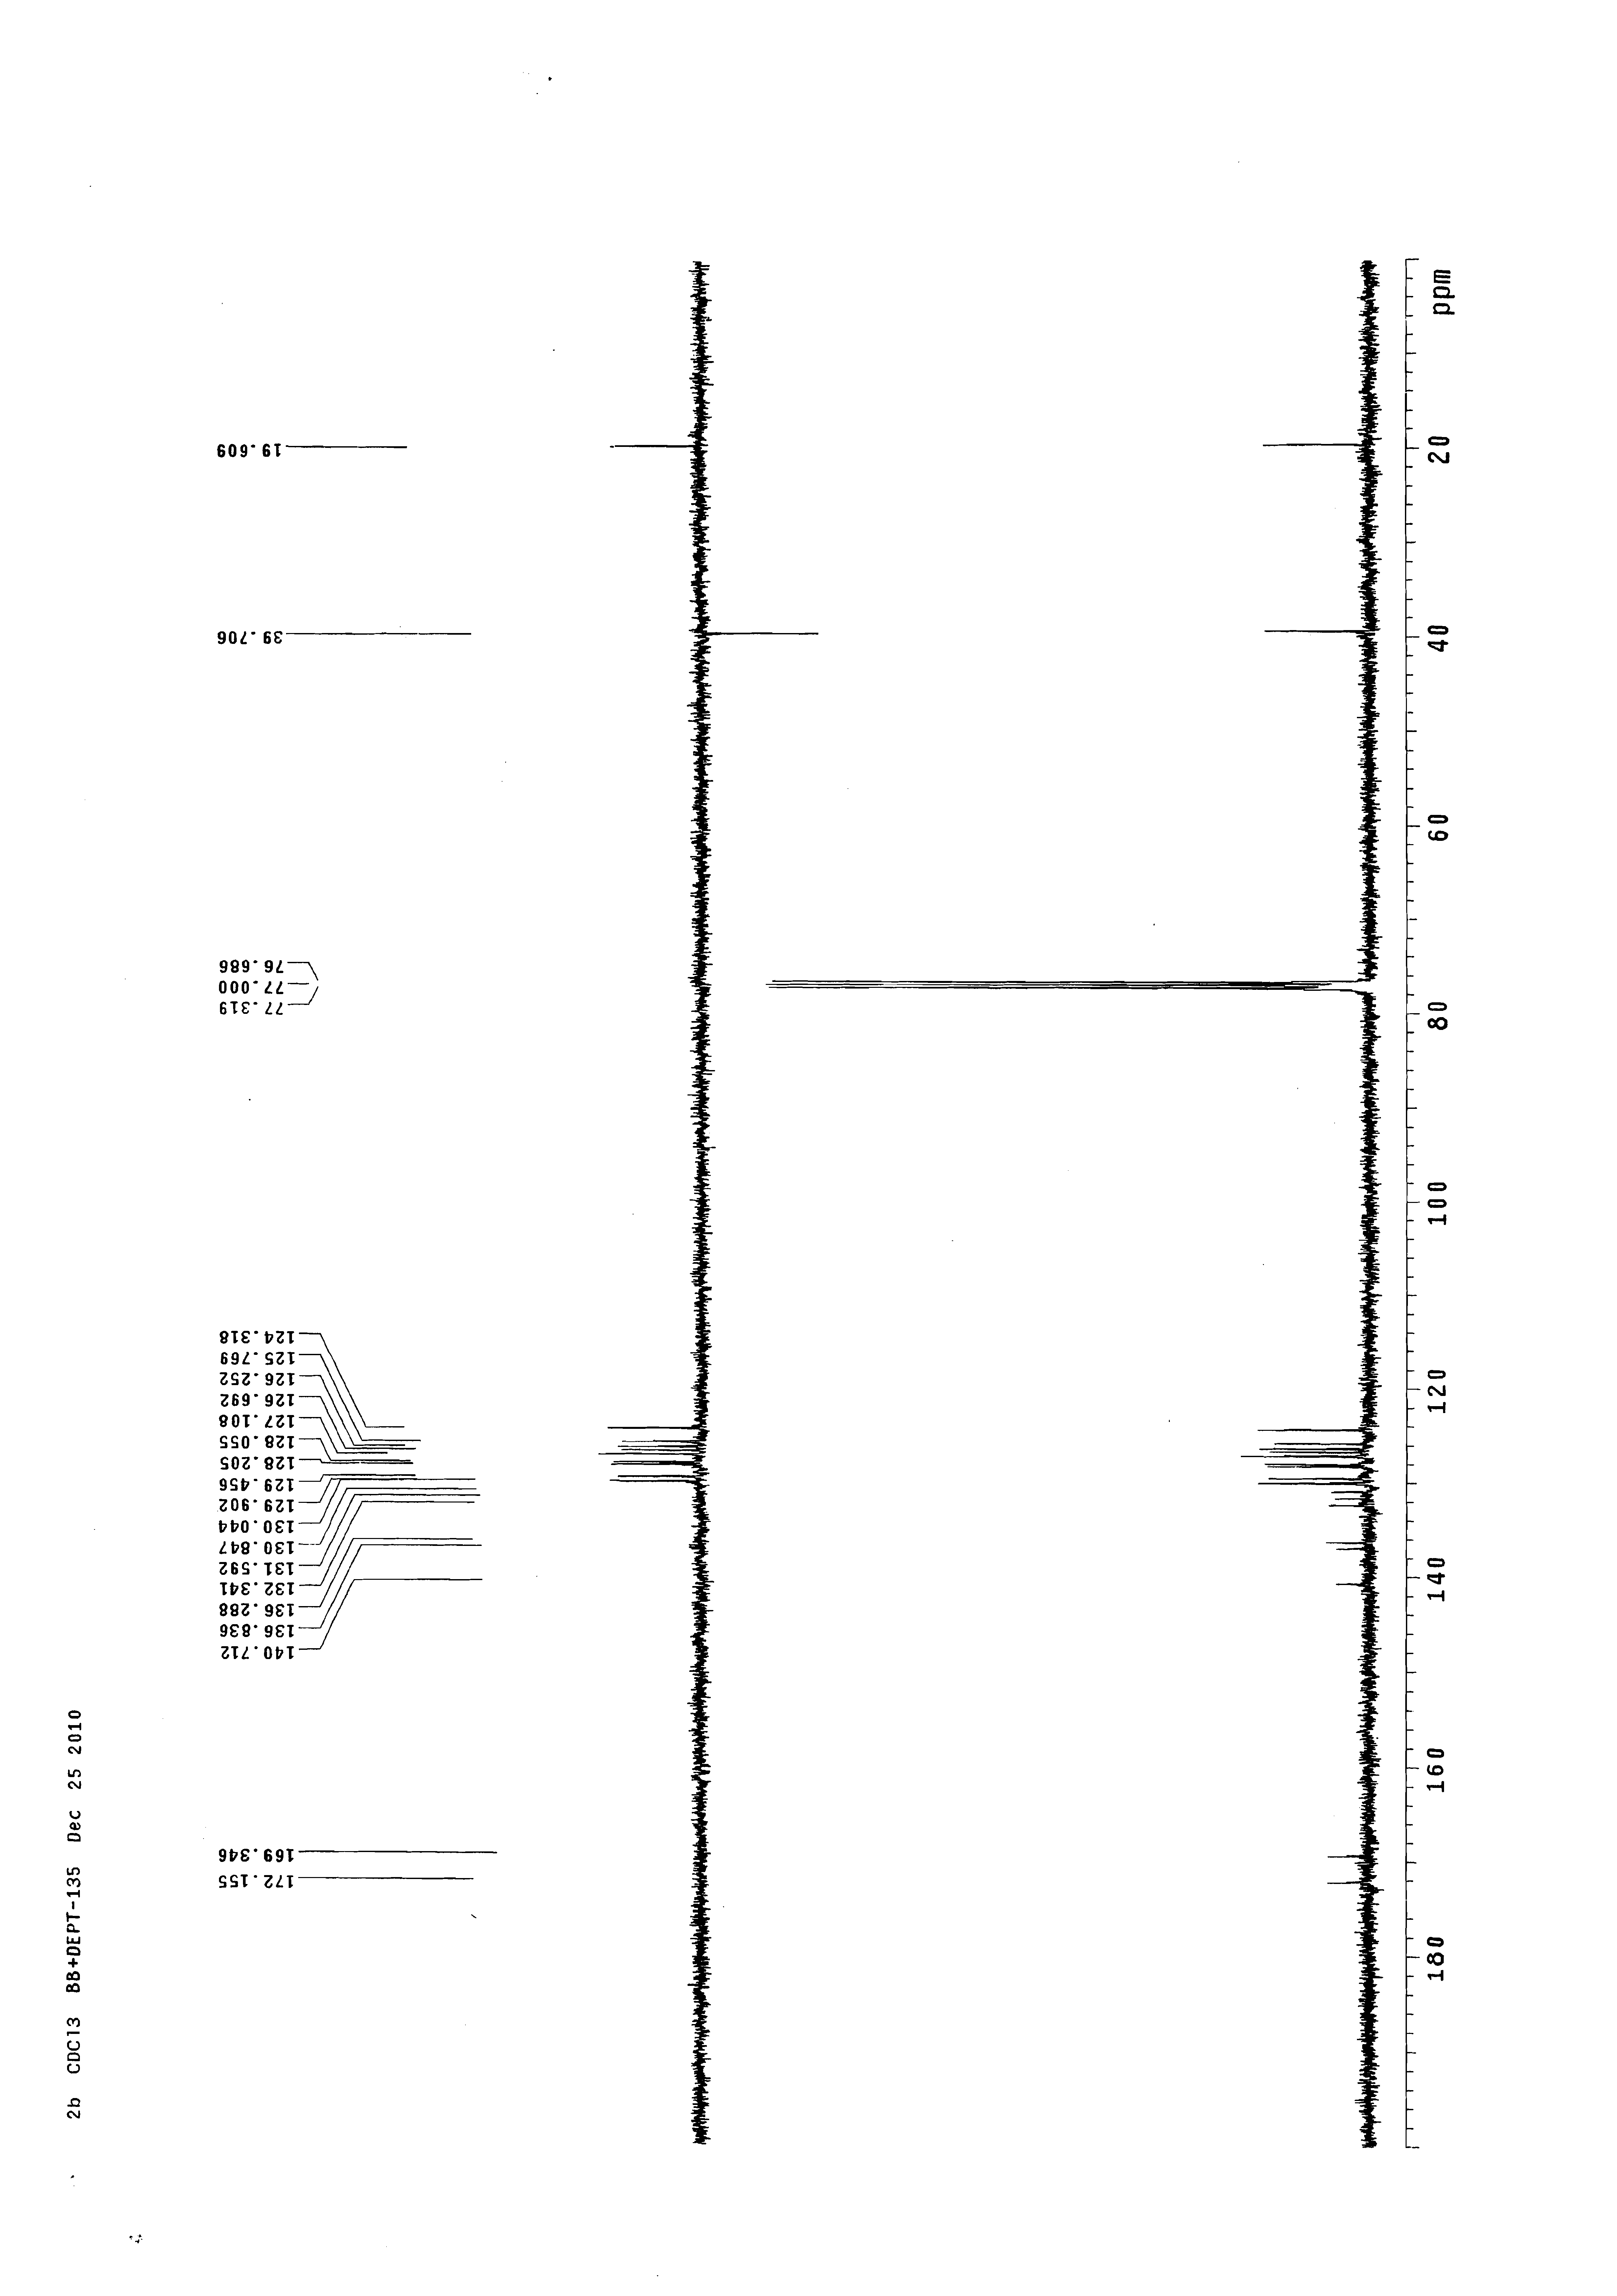
**

***N*,4-dimethyl-2-(2-(2-(methylamino)-2-oxoethyl)phenyl)-1-naphthamide (2c)**

**
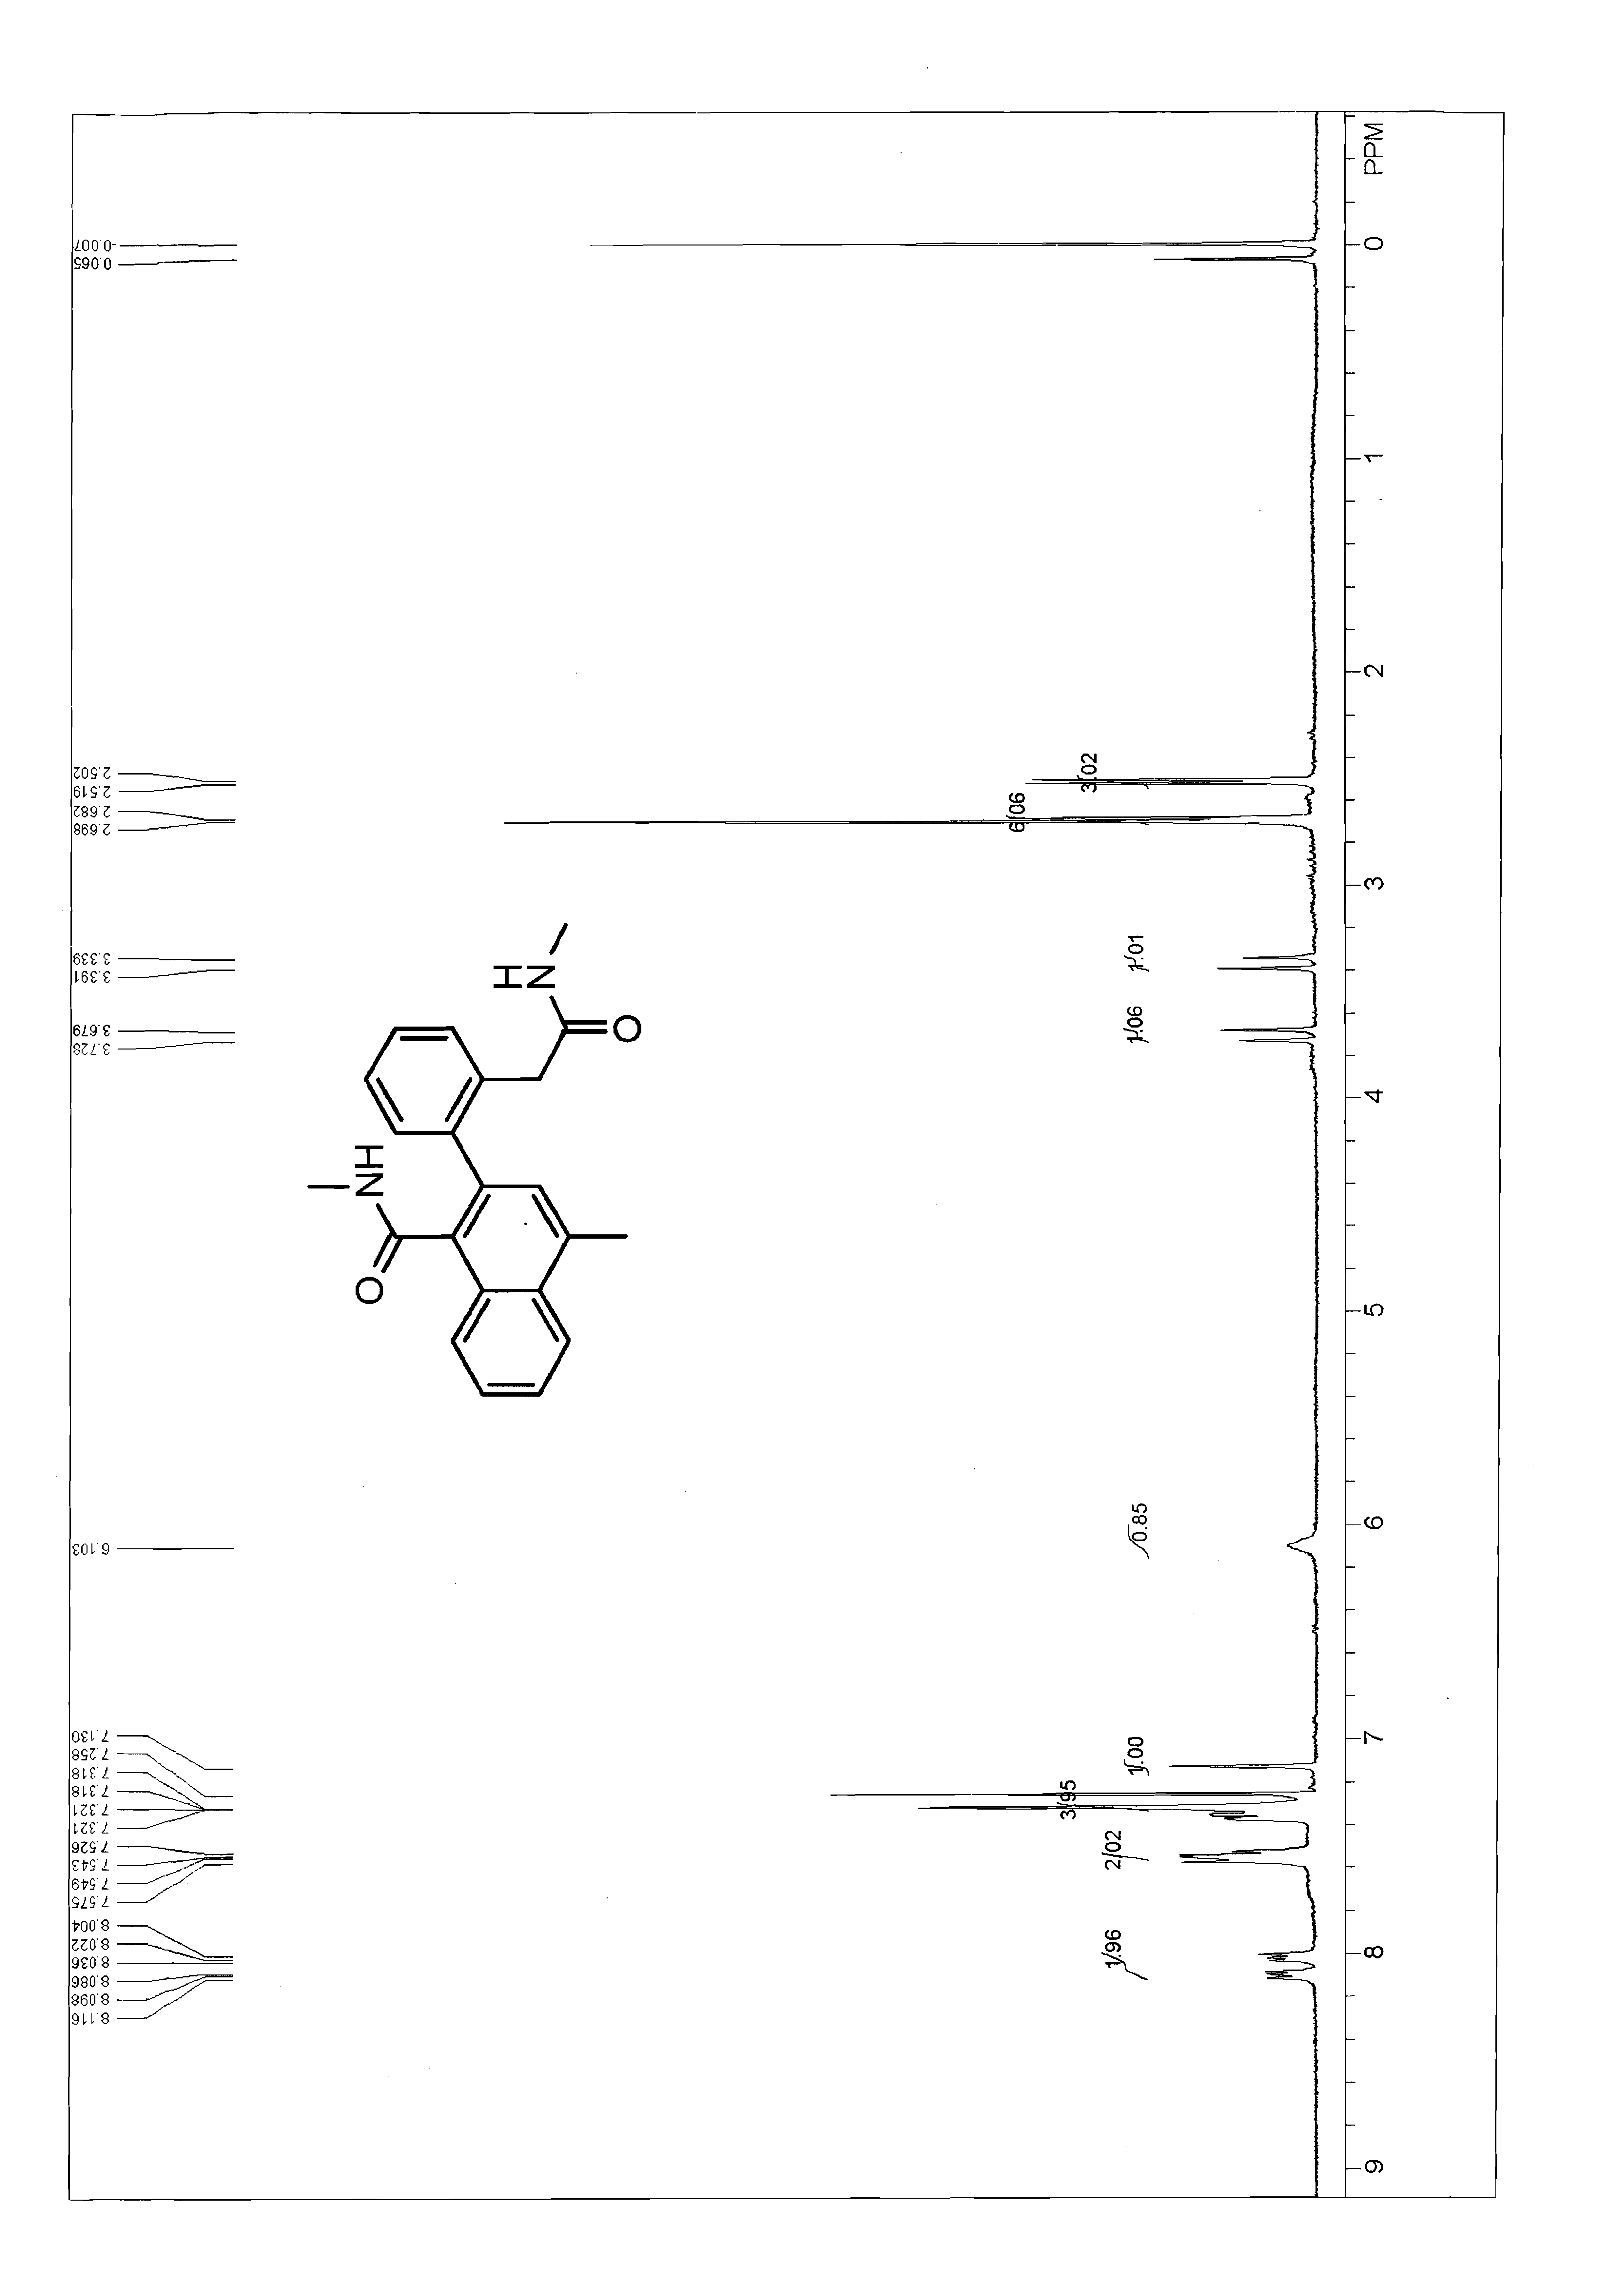
**

**
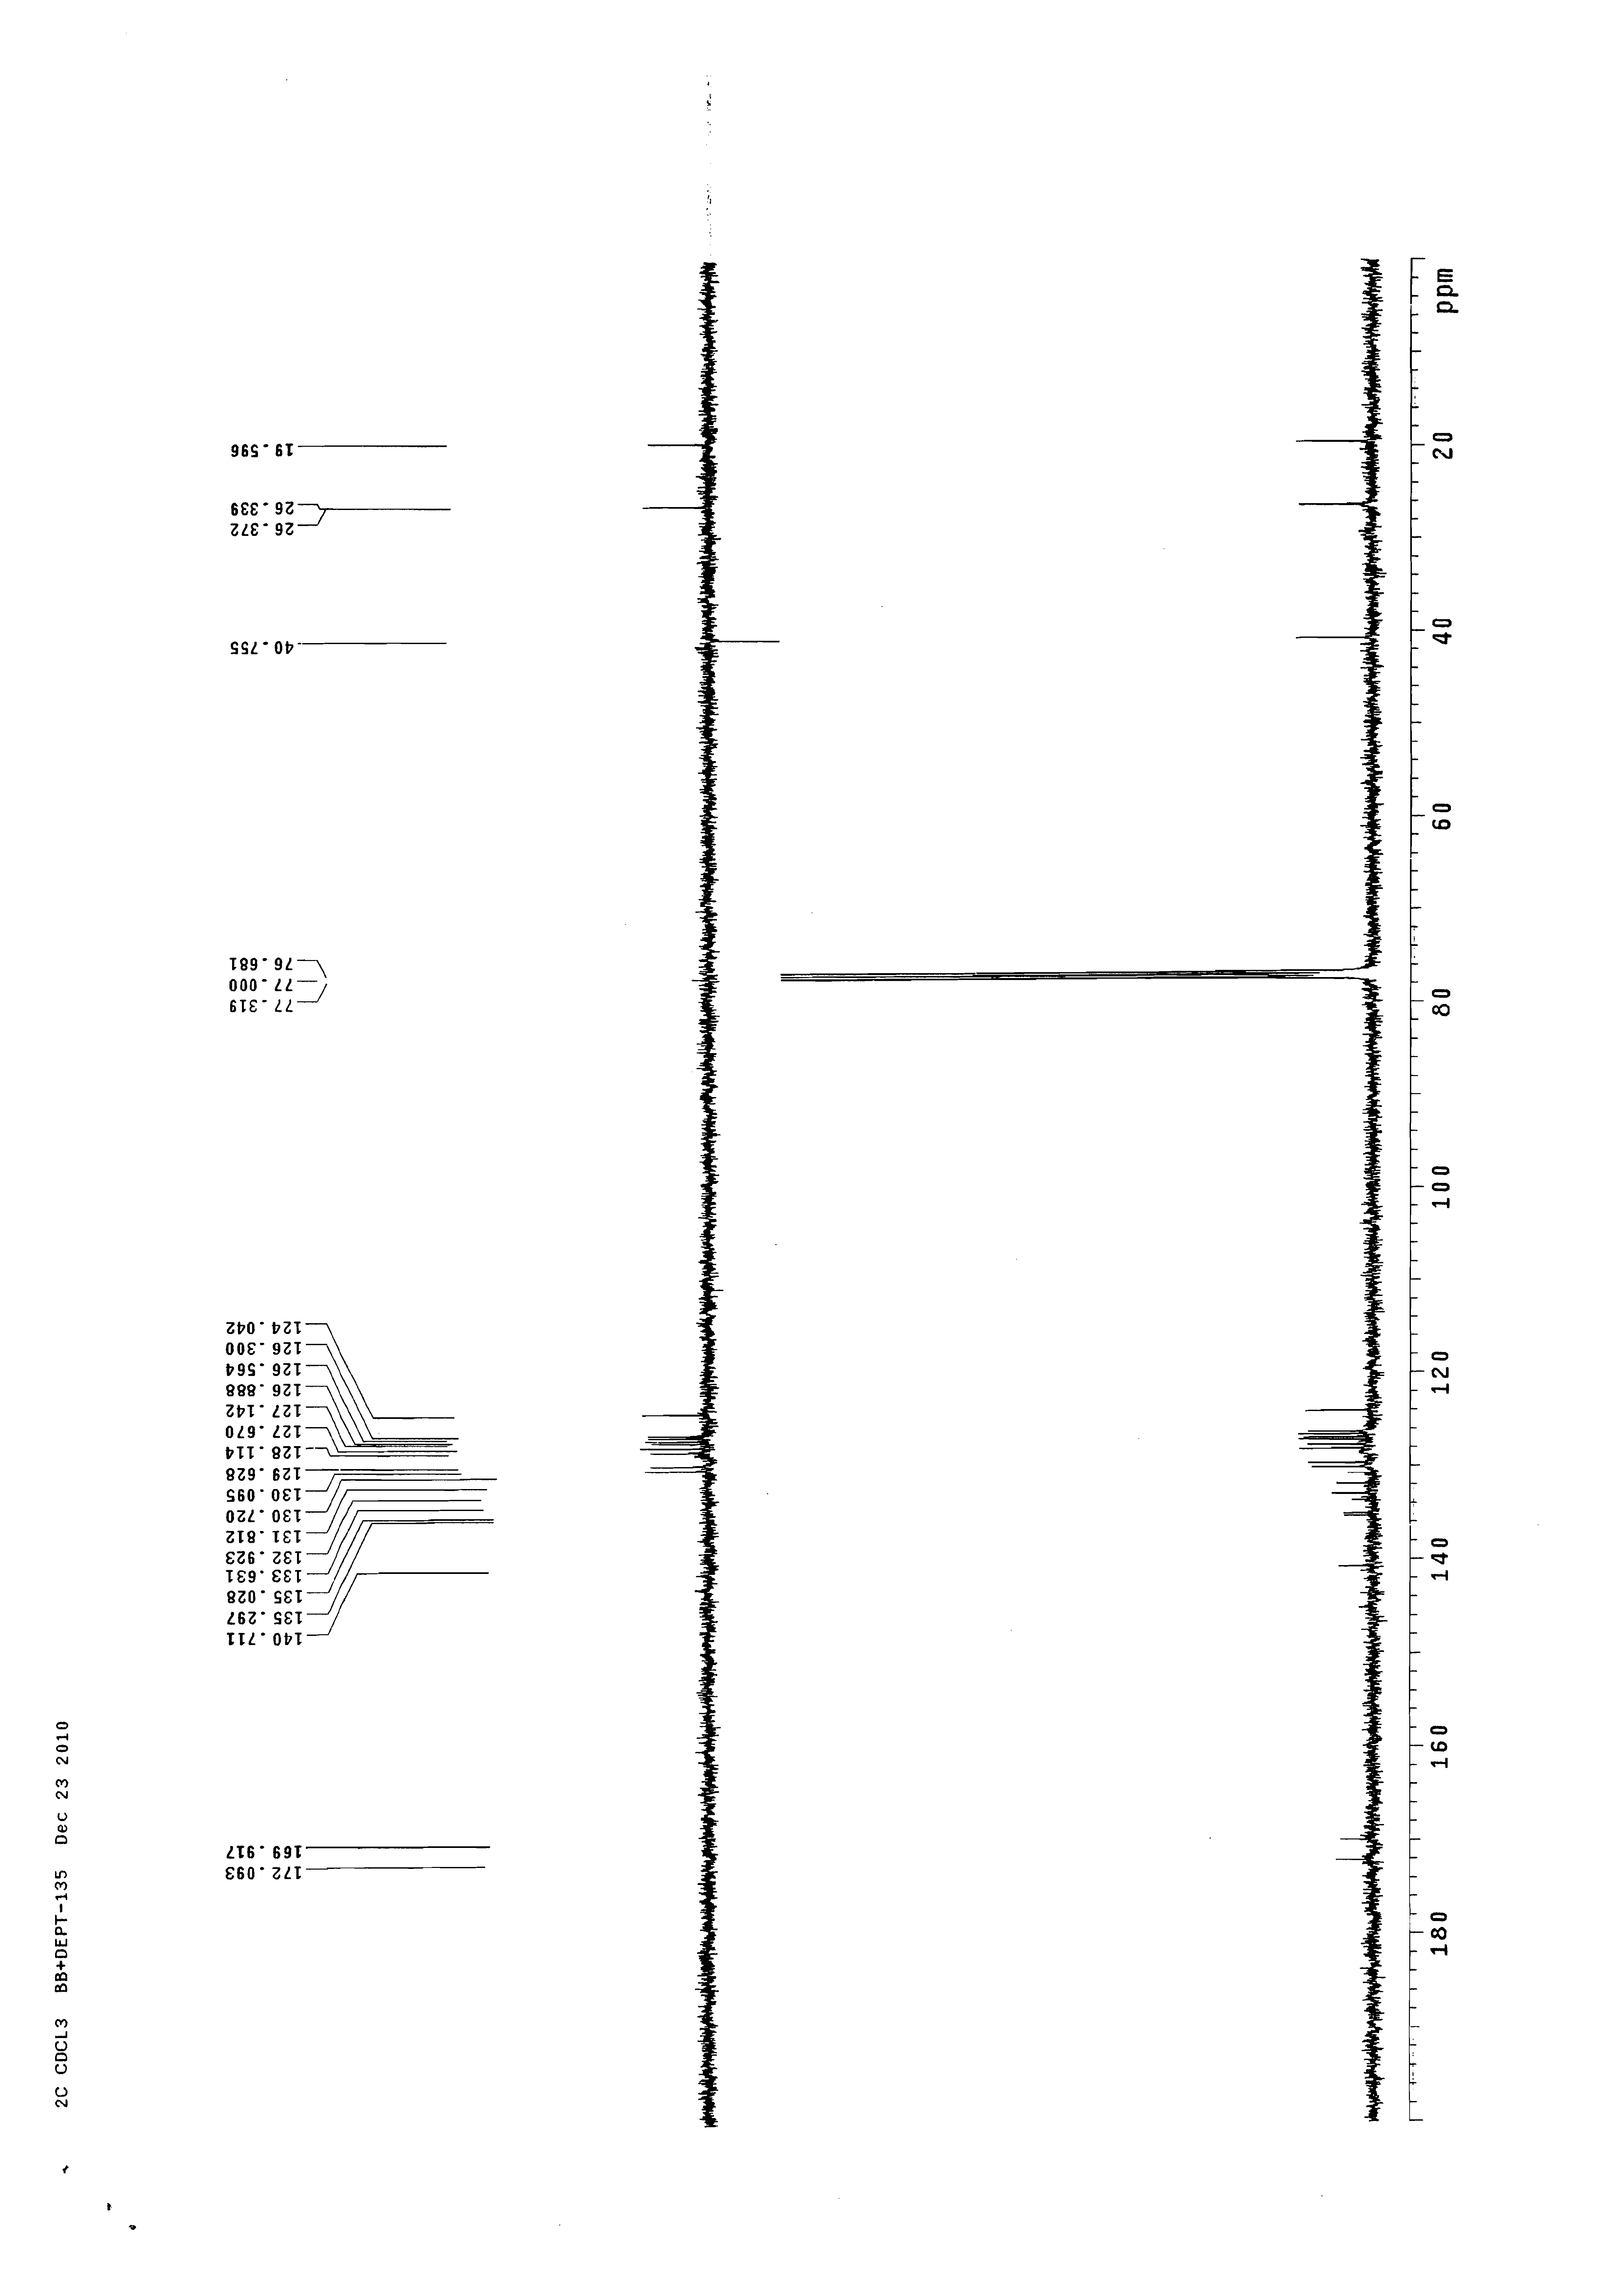
**

**2-(2-(2-(dimethylamino)-2-oxoethyl)phenyl)-*N,N*,4-trimethyl-1-naphthamide (2d)**

**
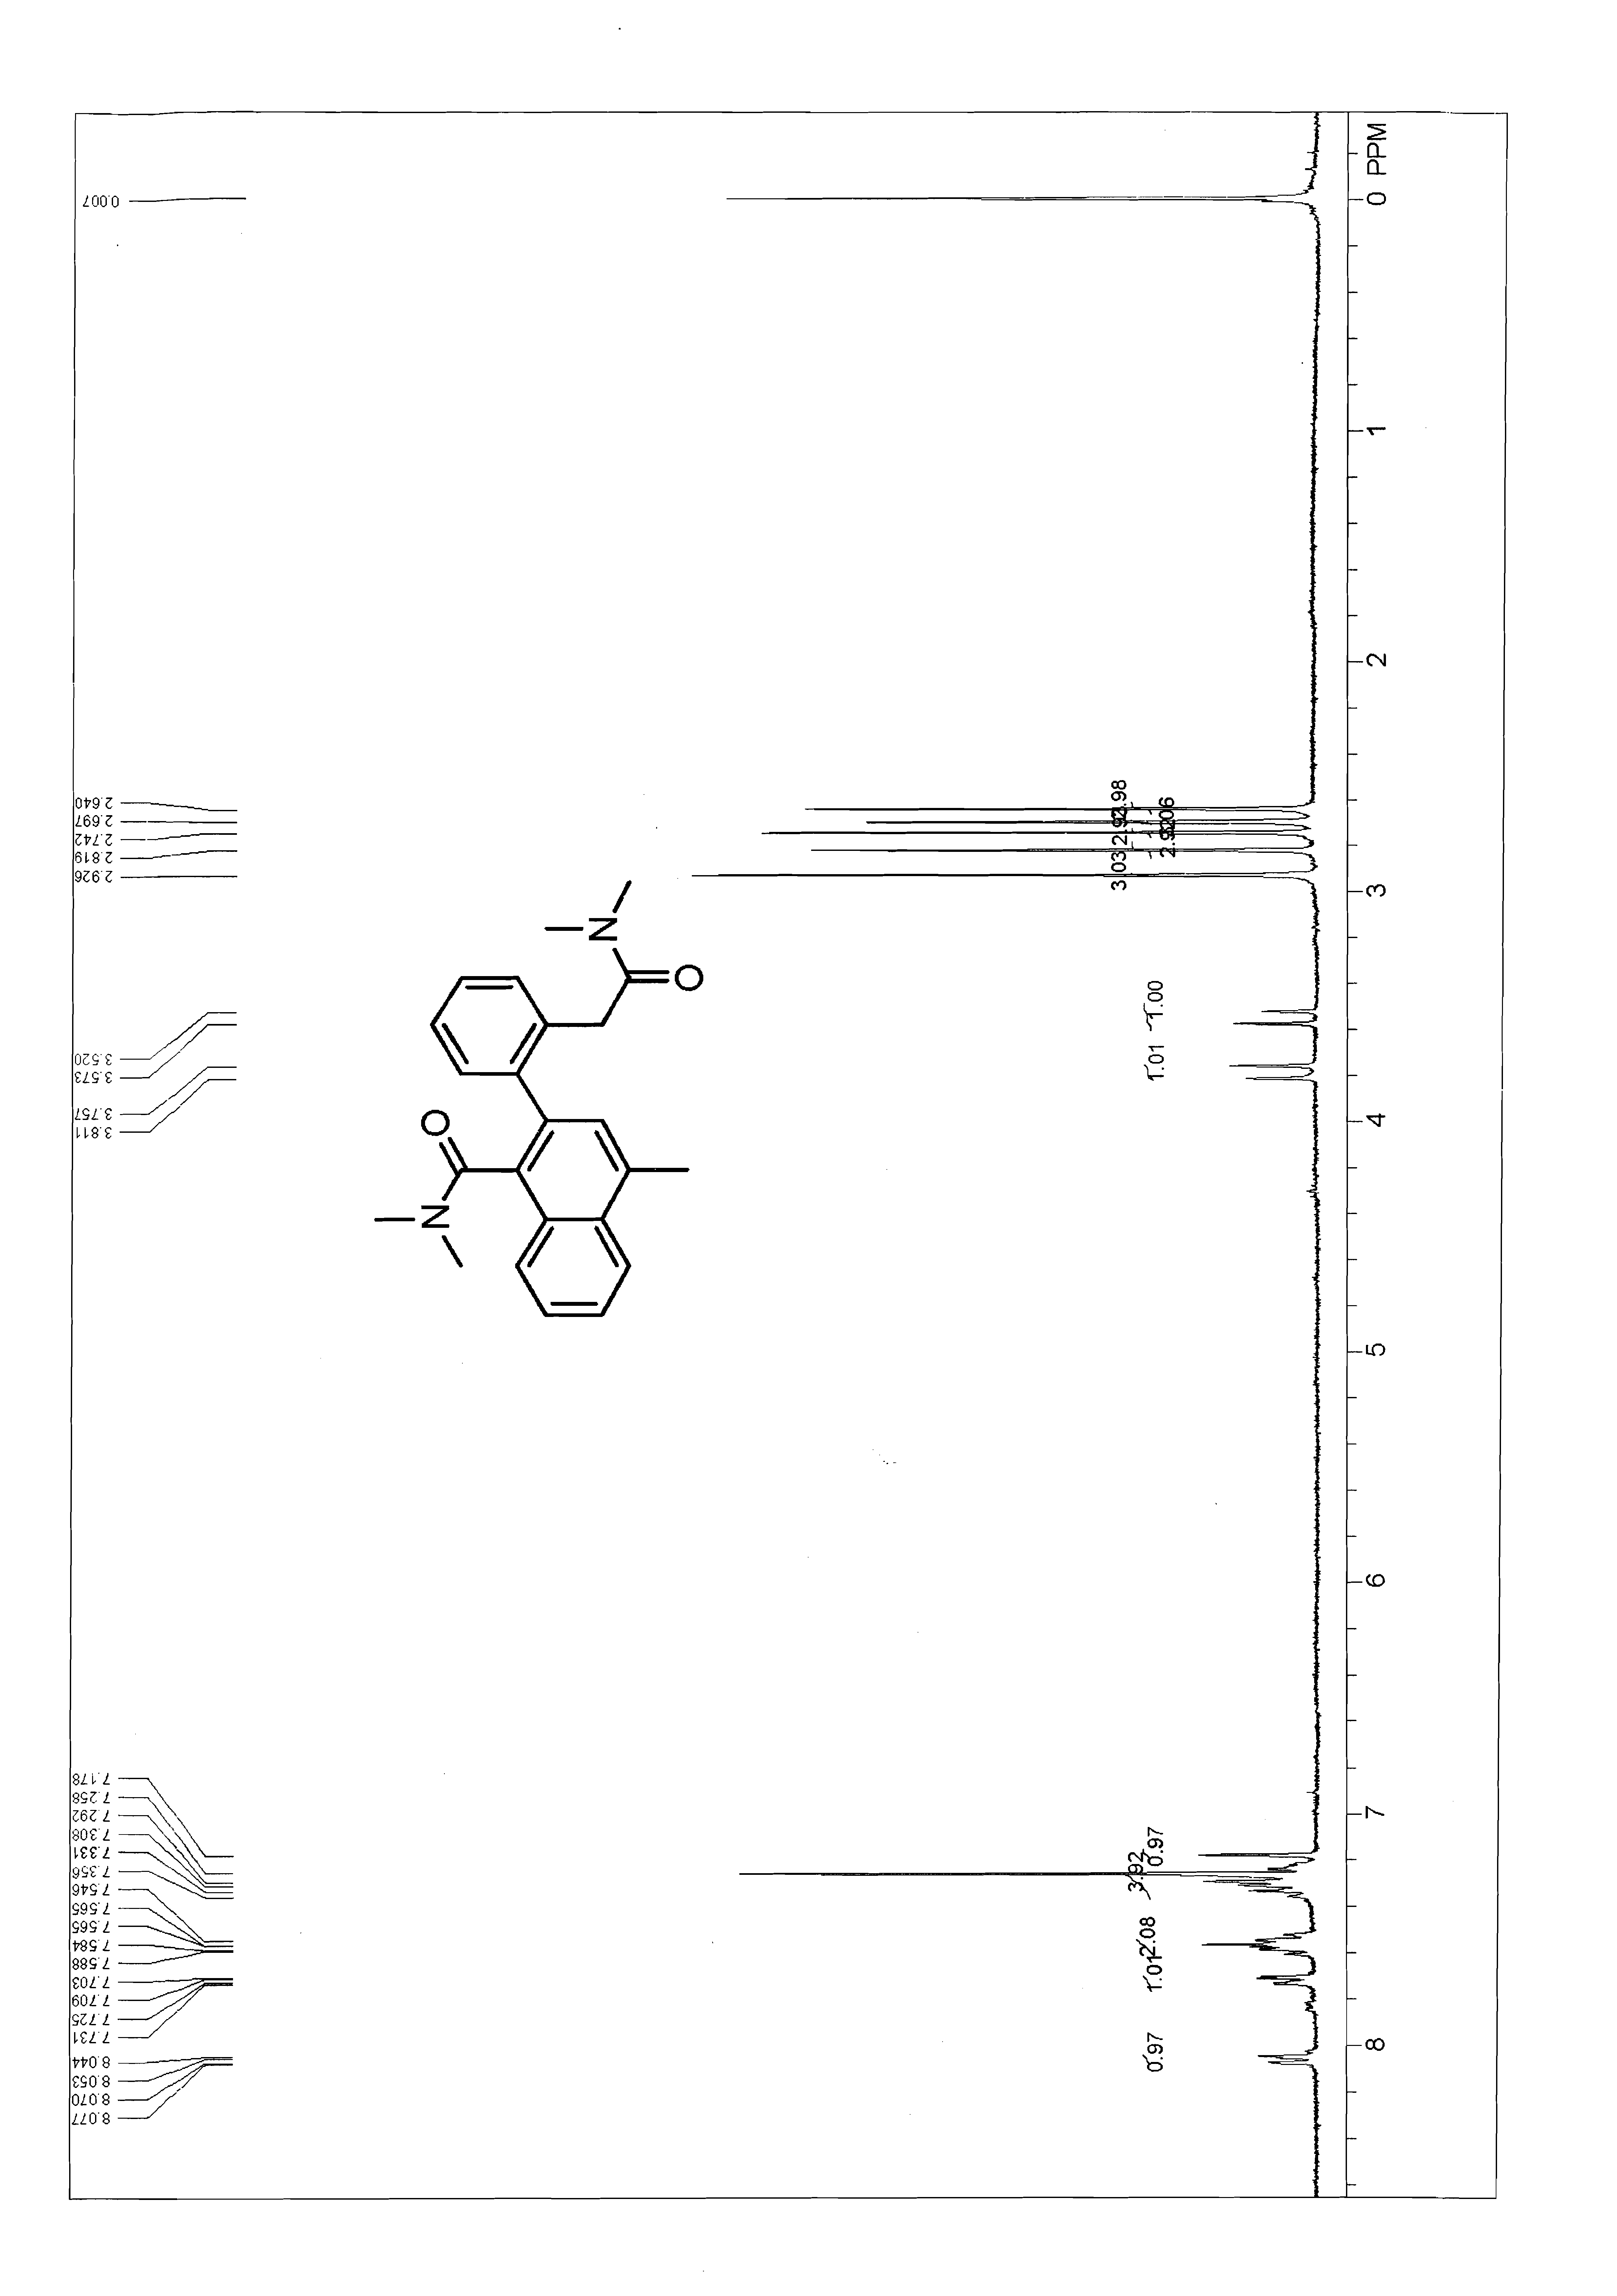
**

**
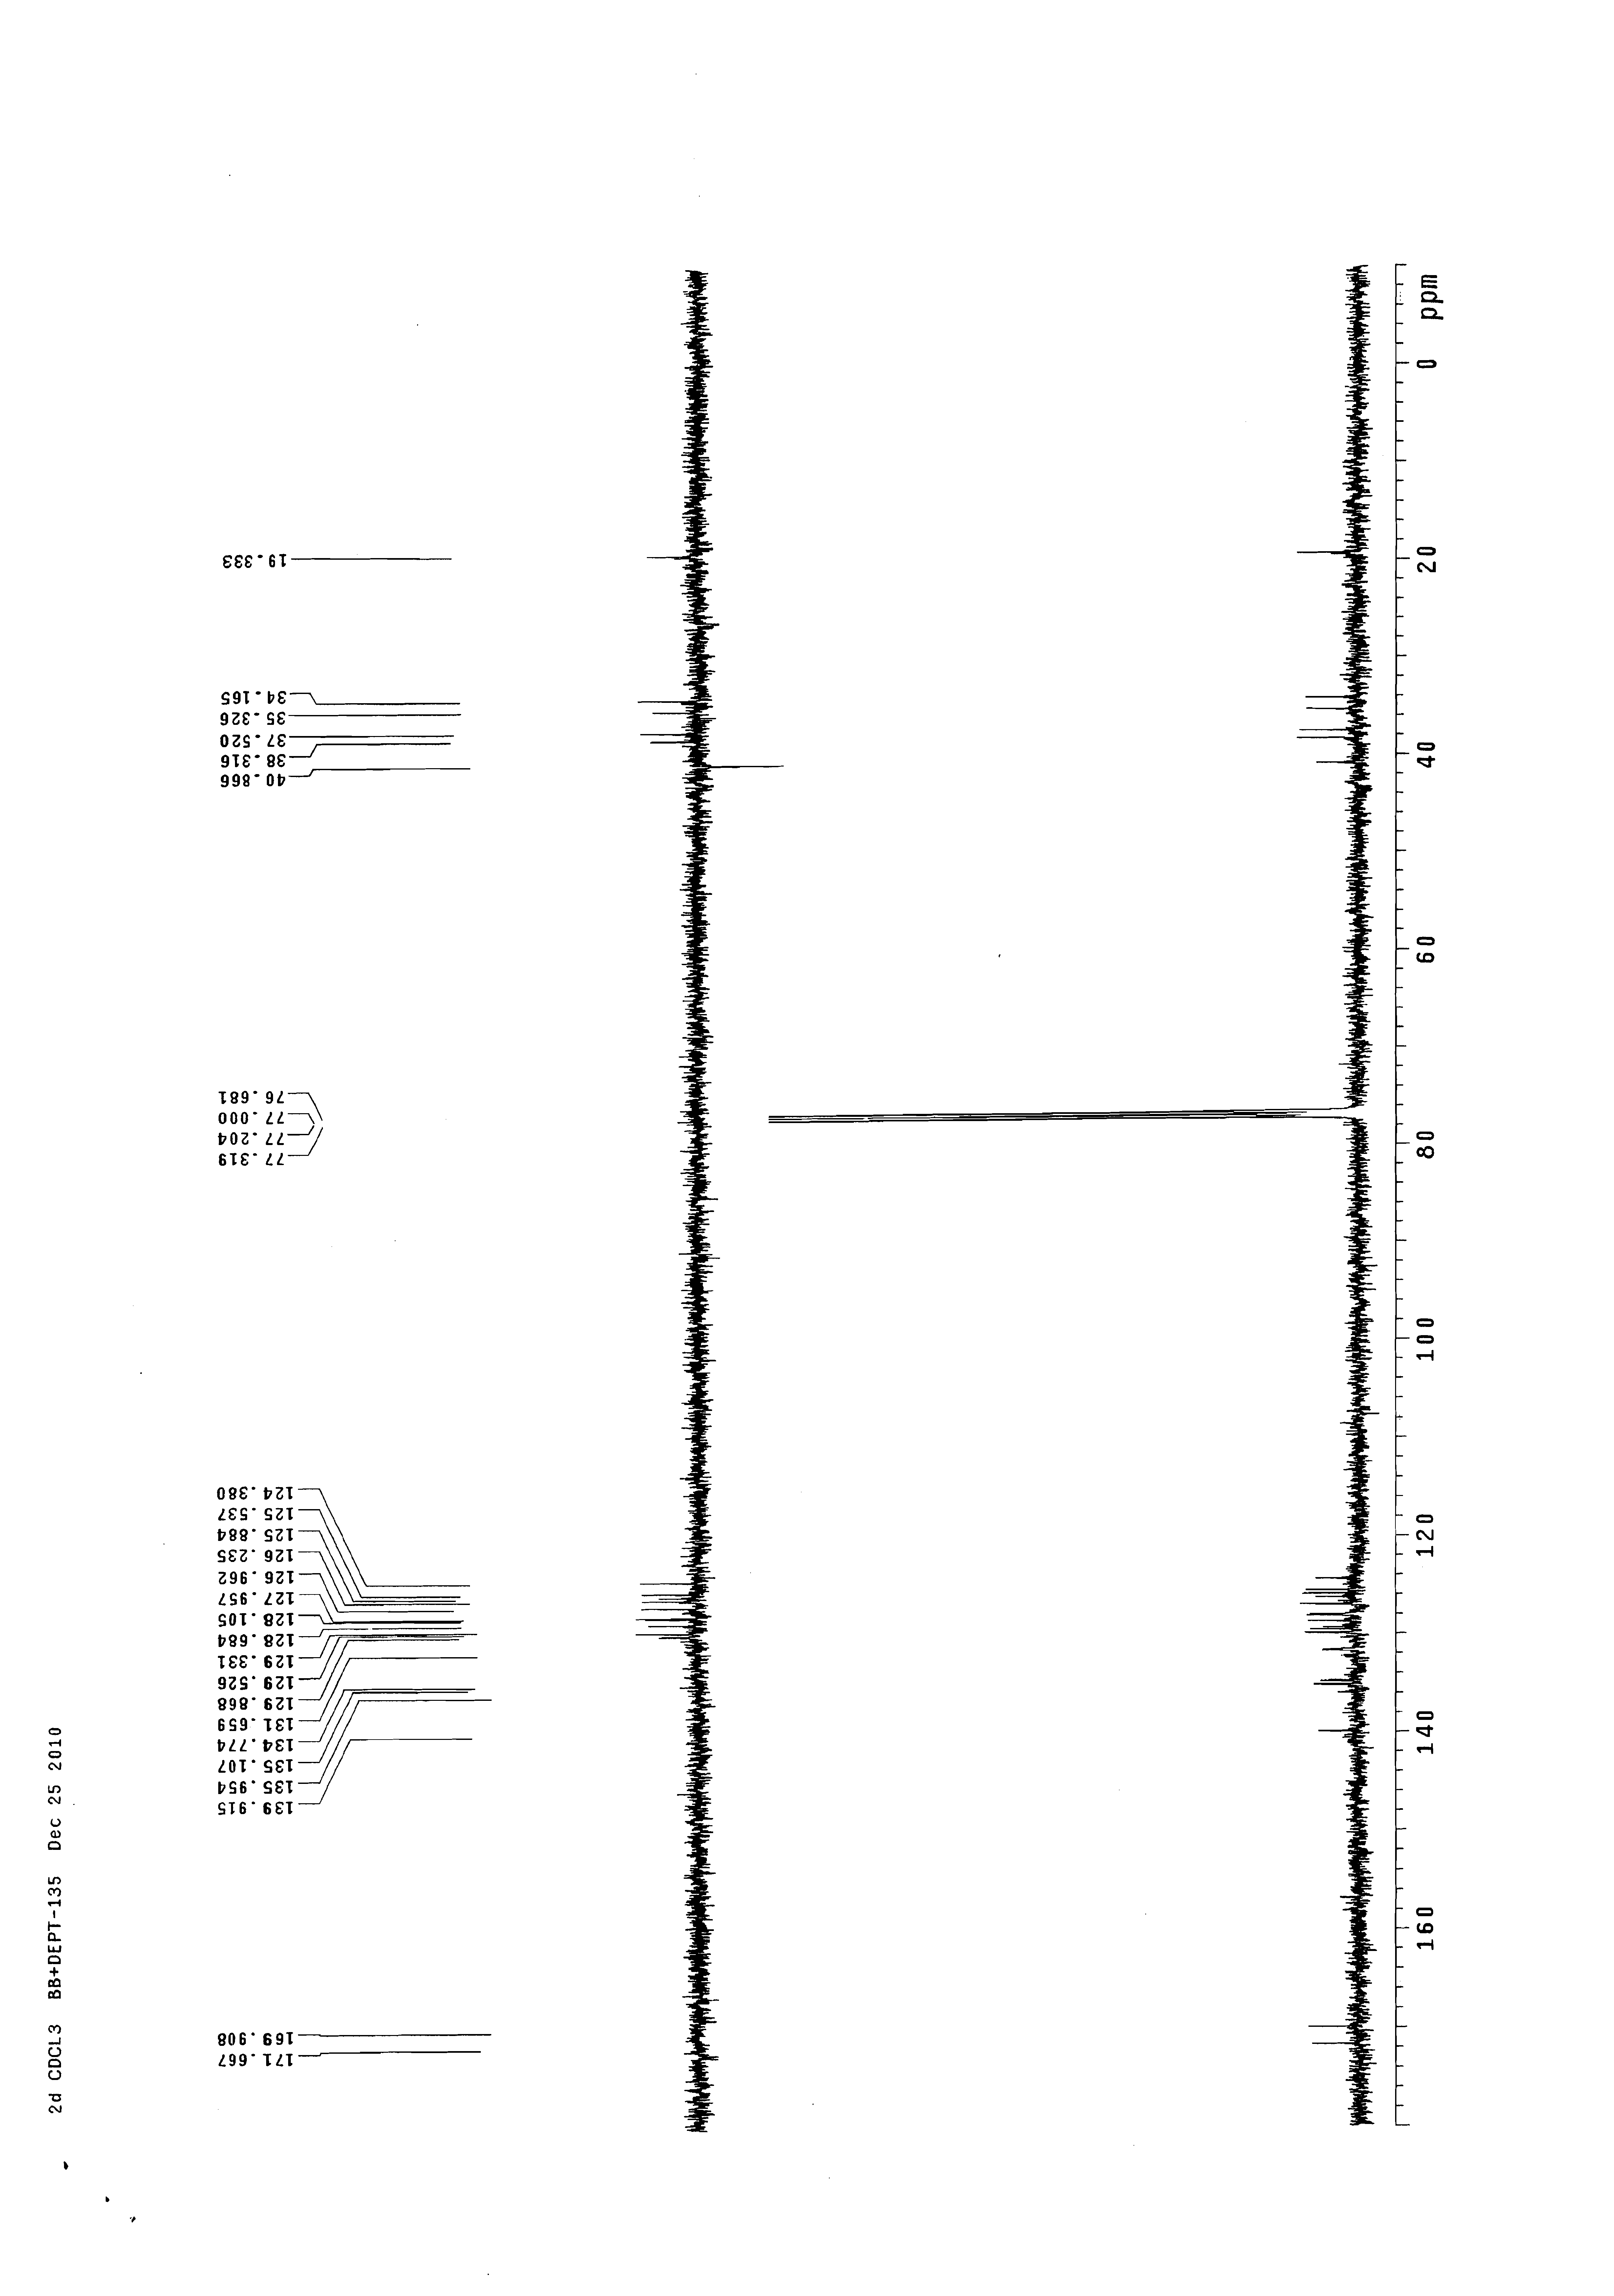
**

**4-methyl-2-(2-(2-oxo-2-(phenylamino)ethyl)phenyl)-*N*-phenyl-1-naphthamide (2e)**


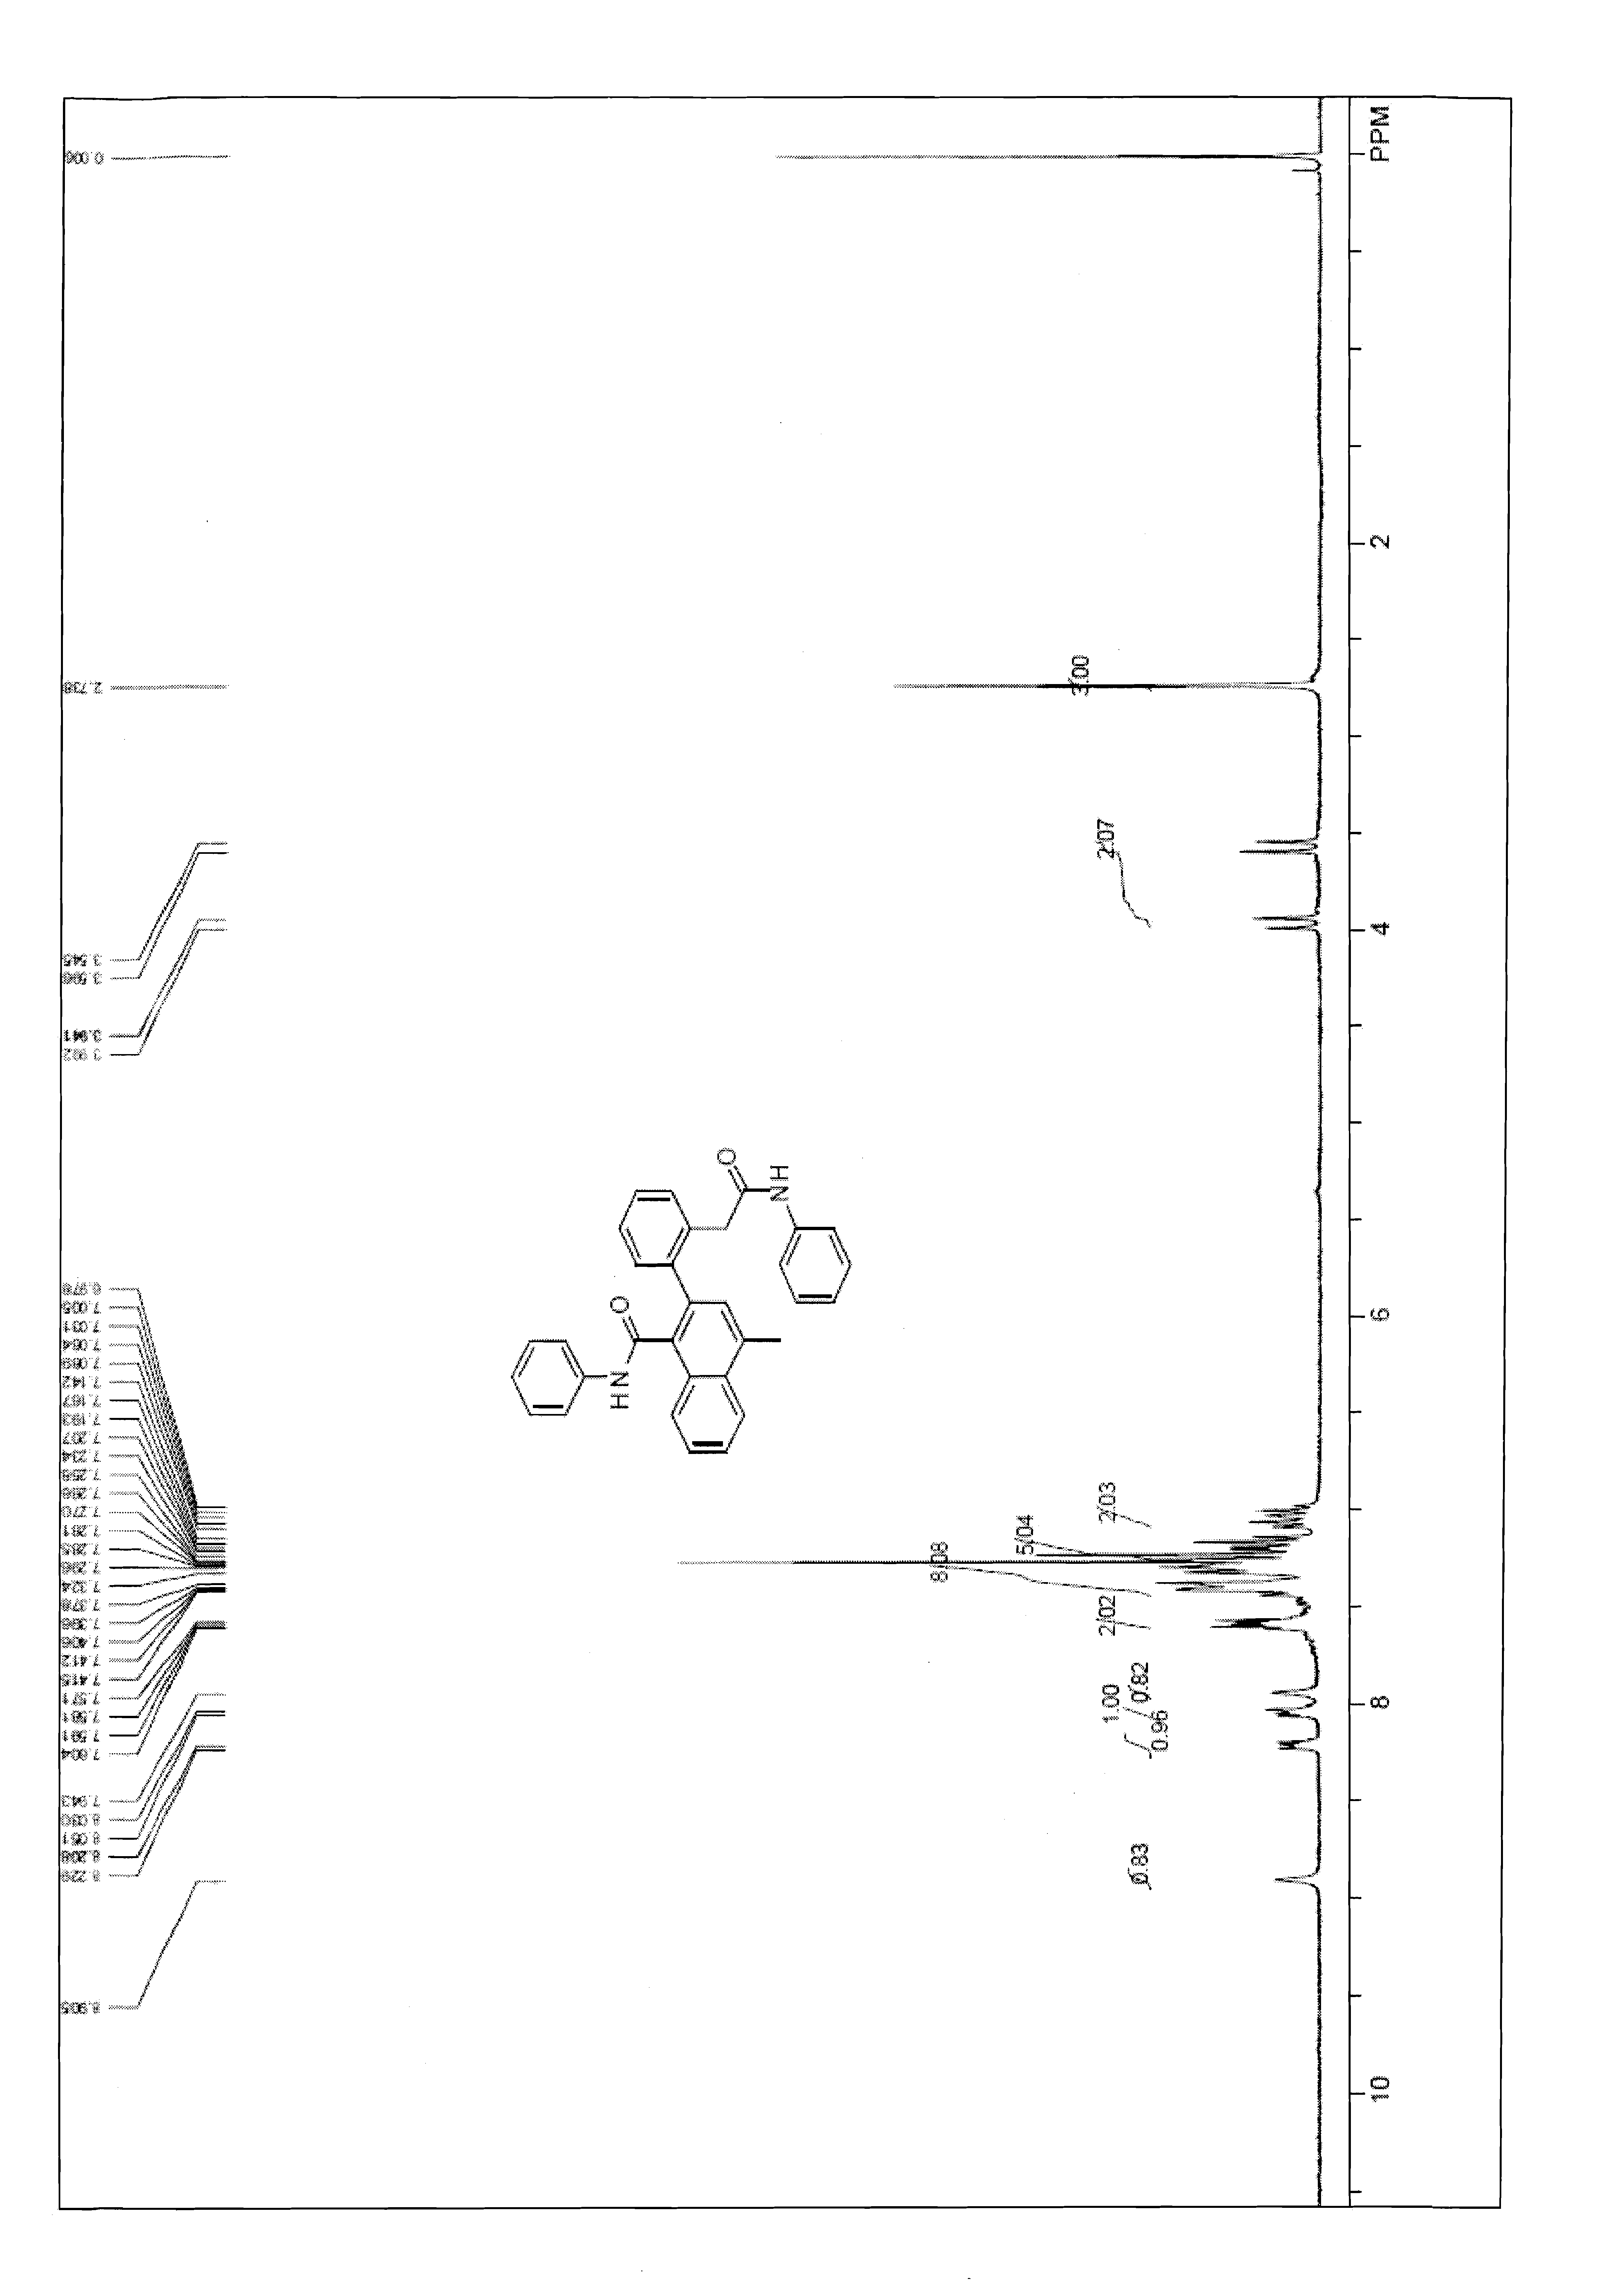


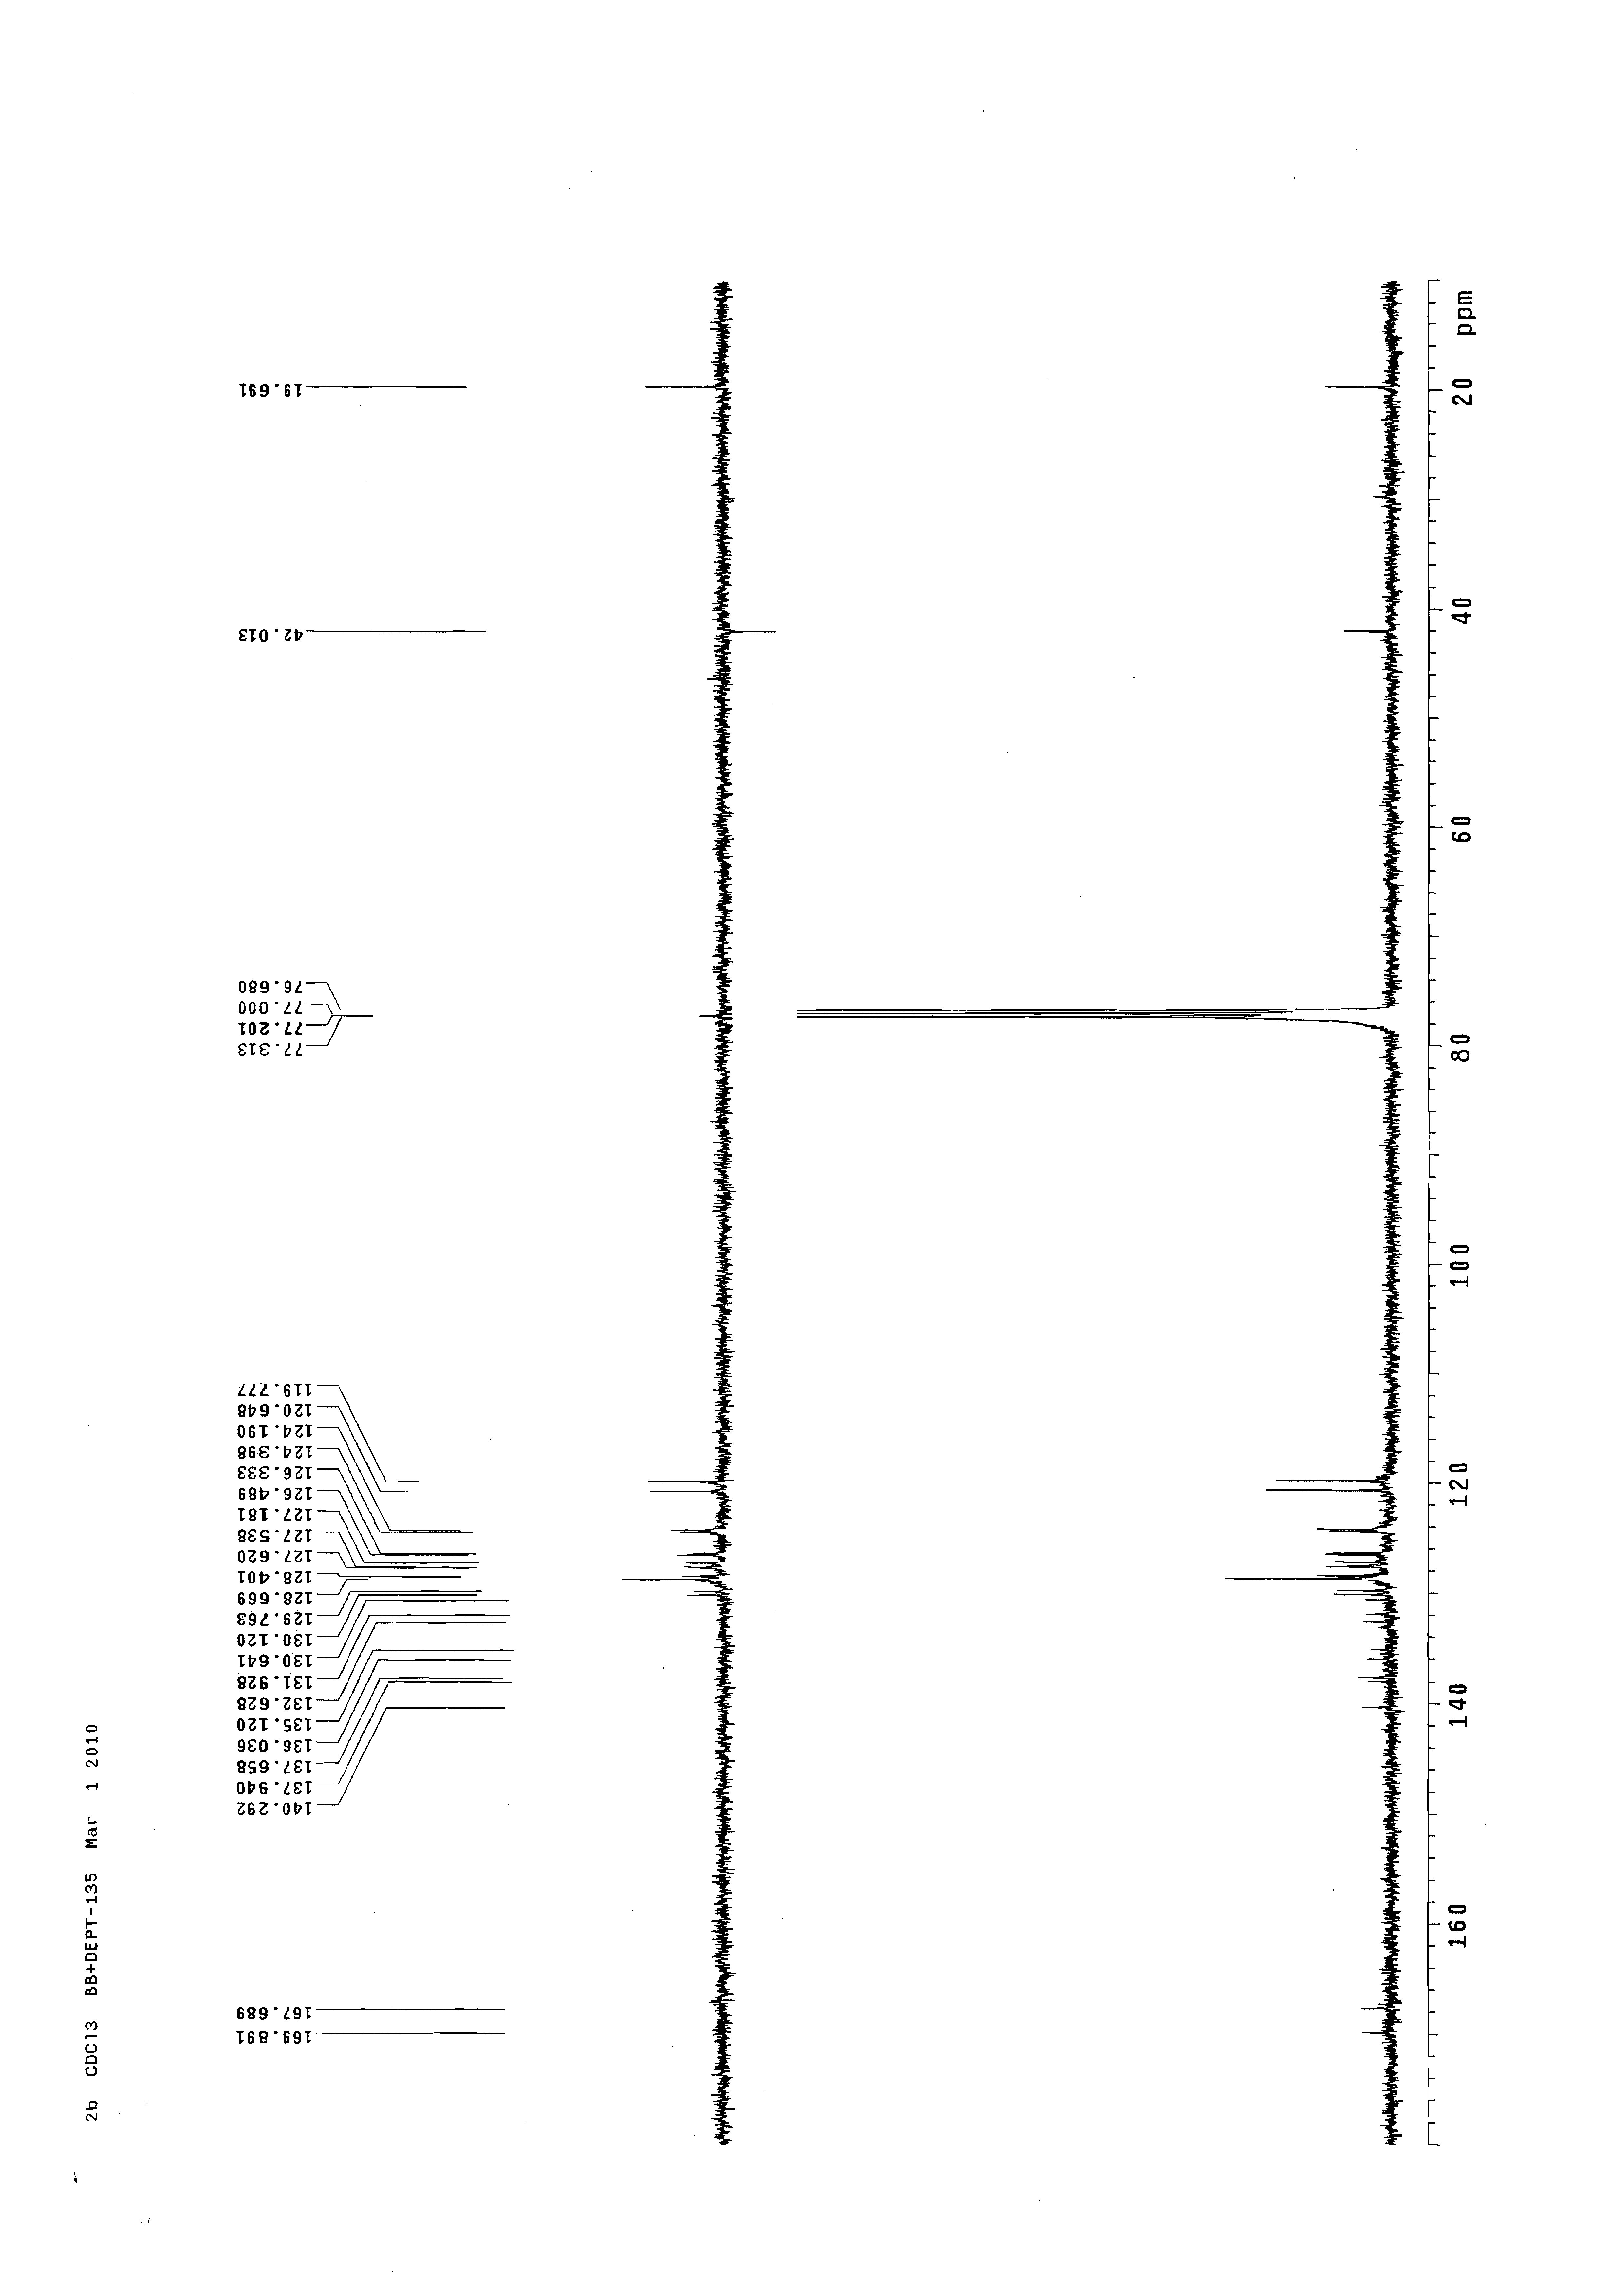


***N*-(4-methoxyphenyl)-2-(2-(2-(4-methoxyphenylamino)-2-oxoethyl)phenyl)-4-methyl-1-naphthamide (2f)**


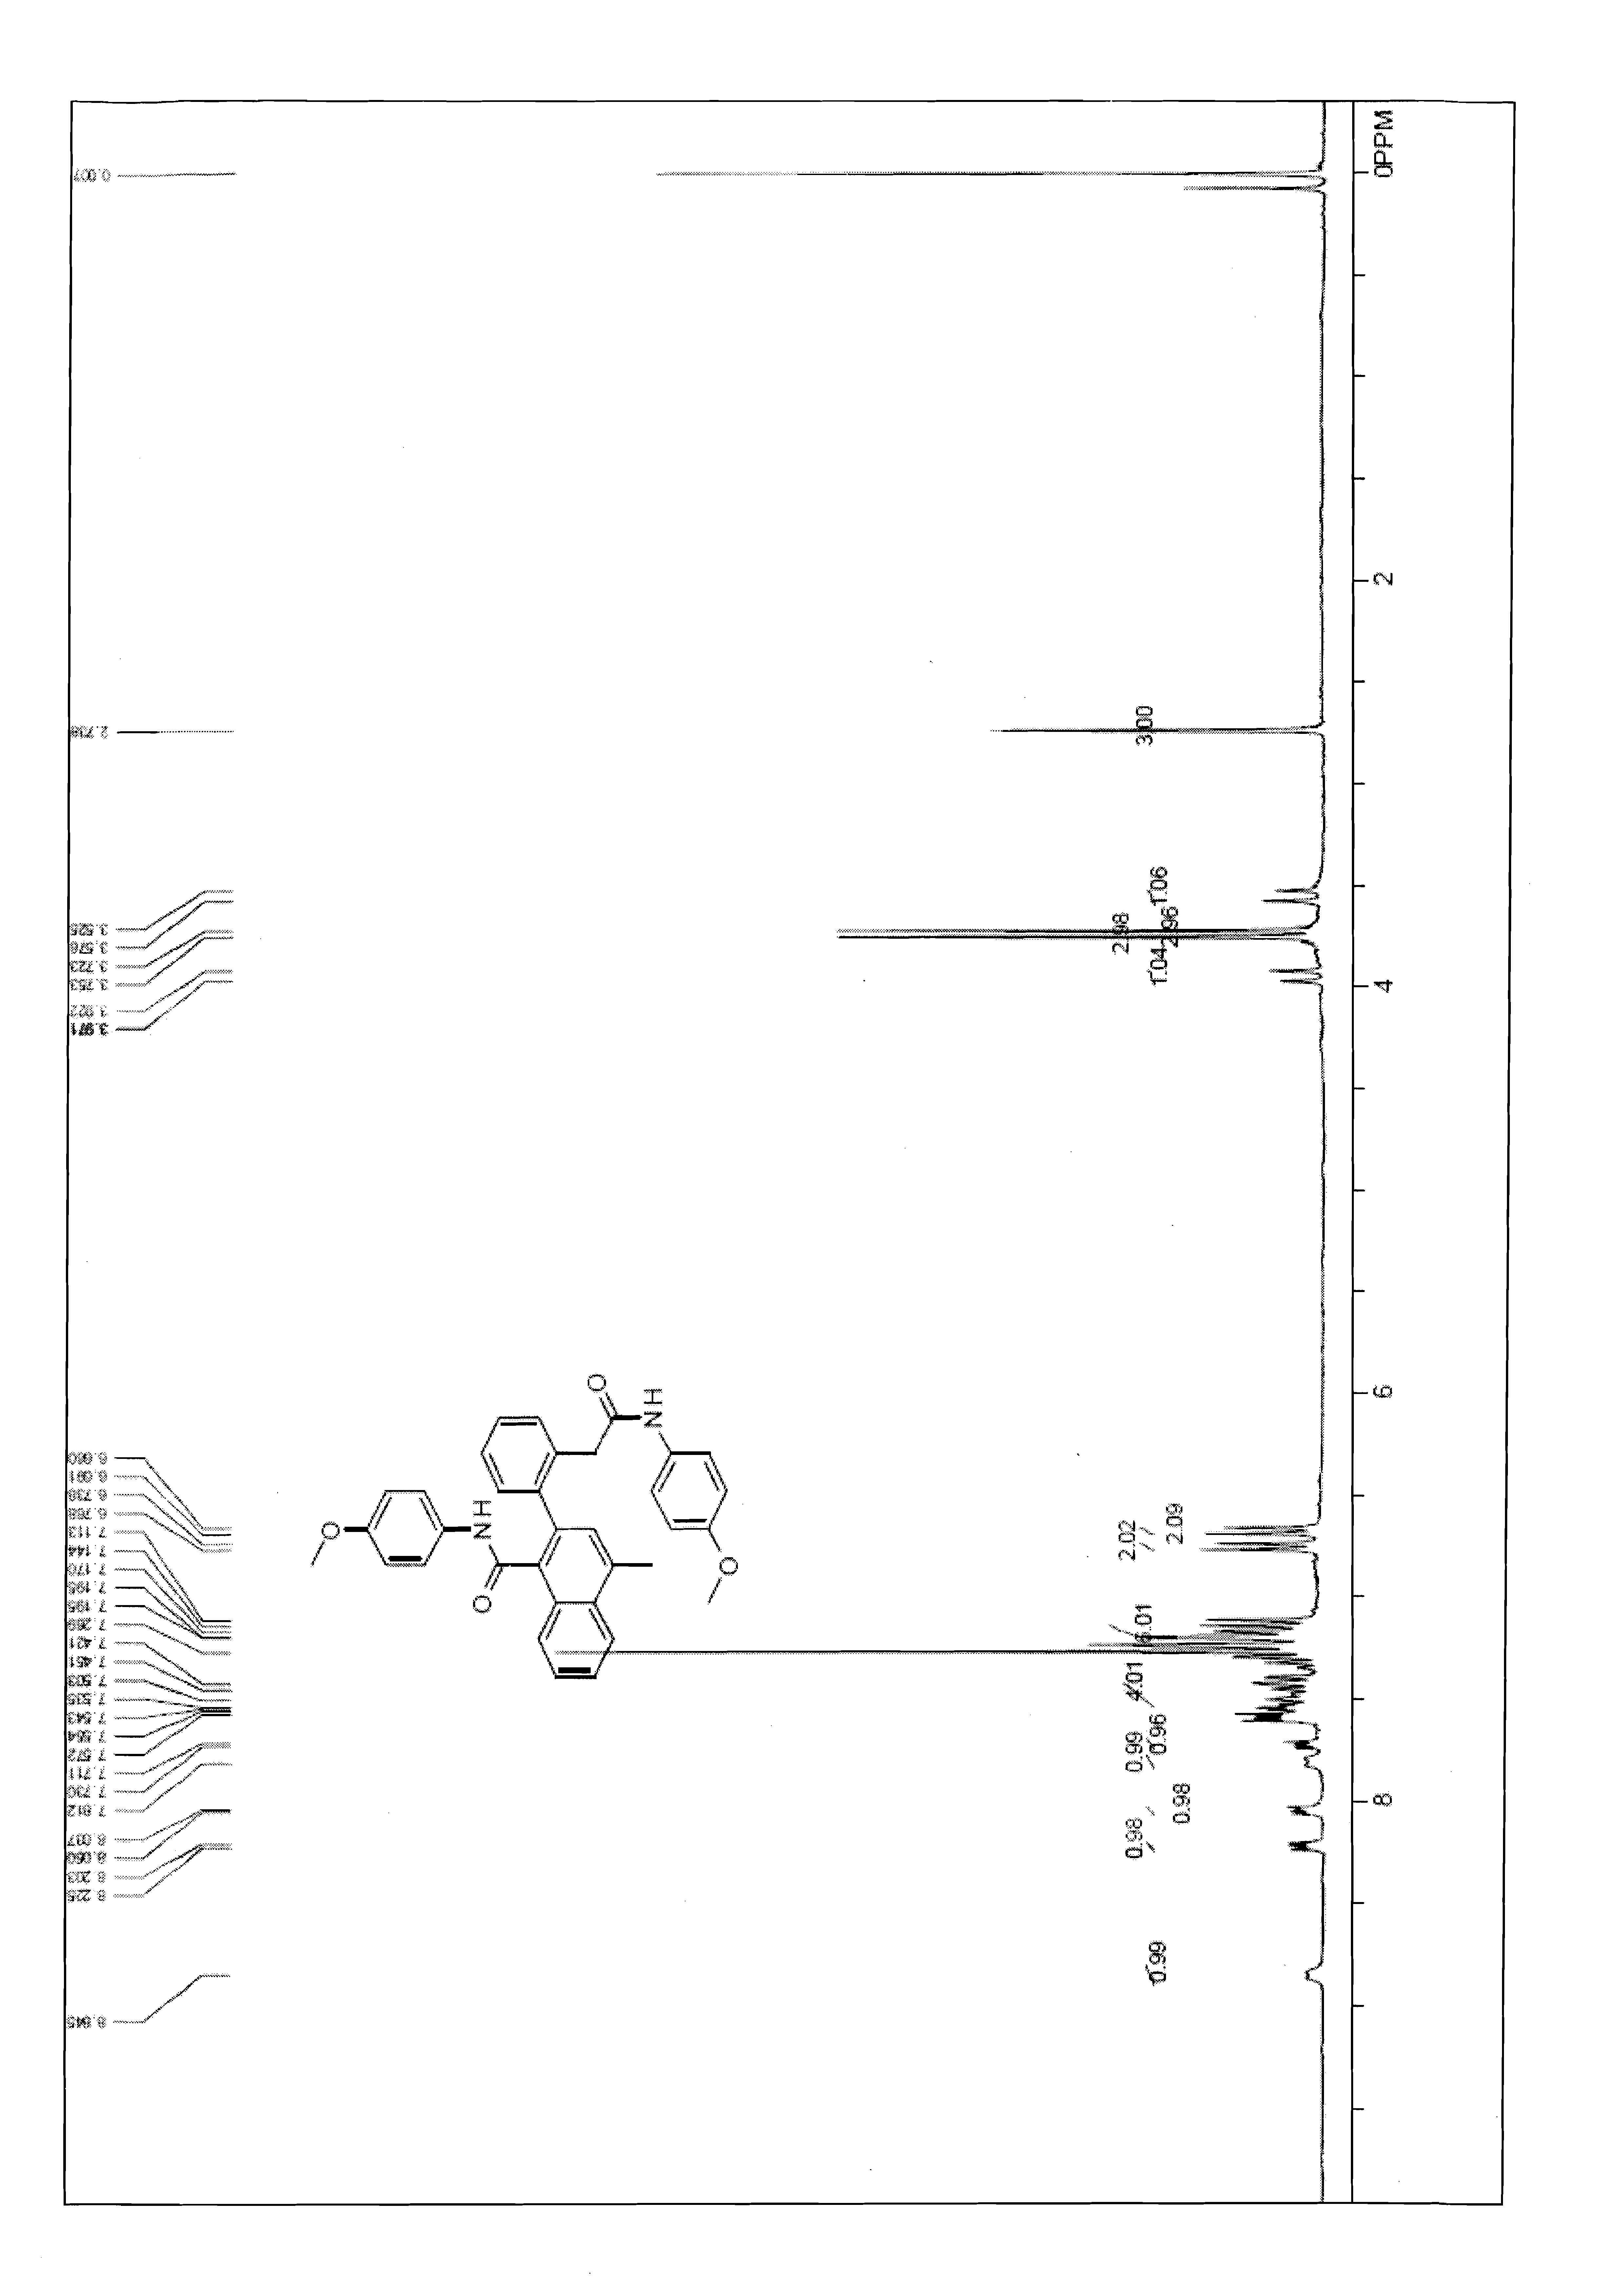


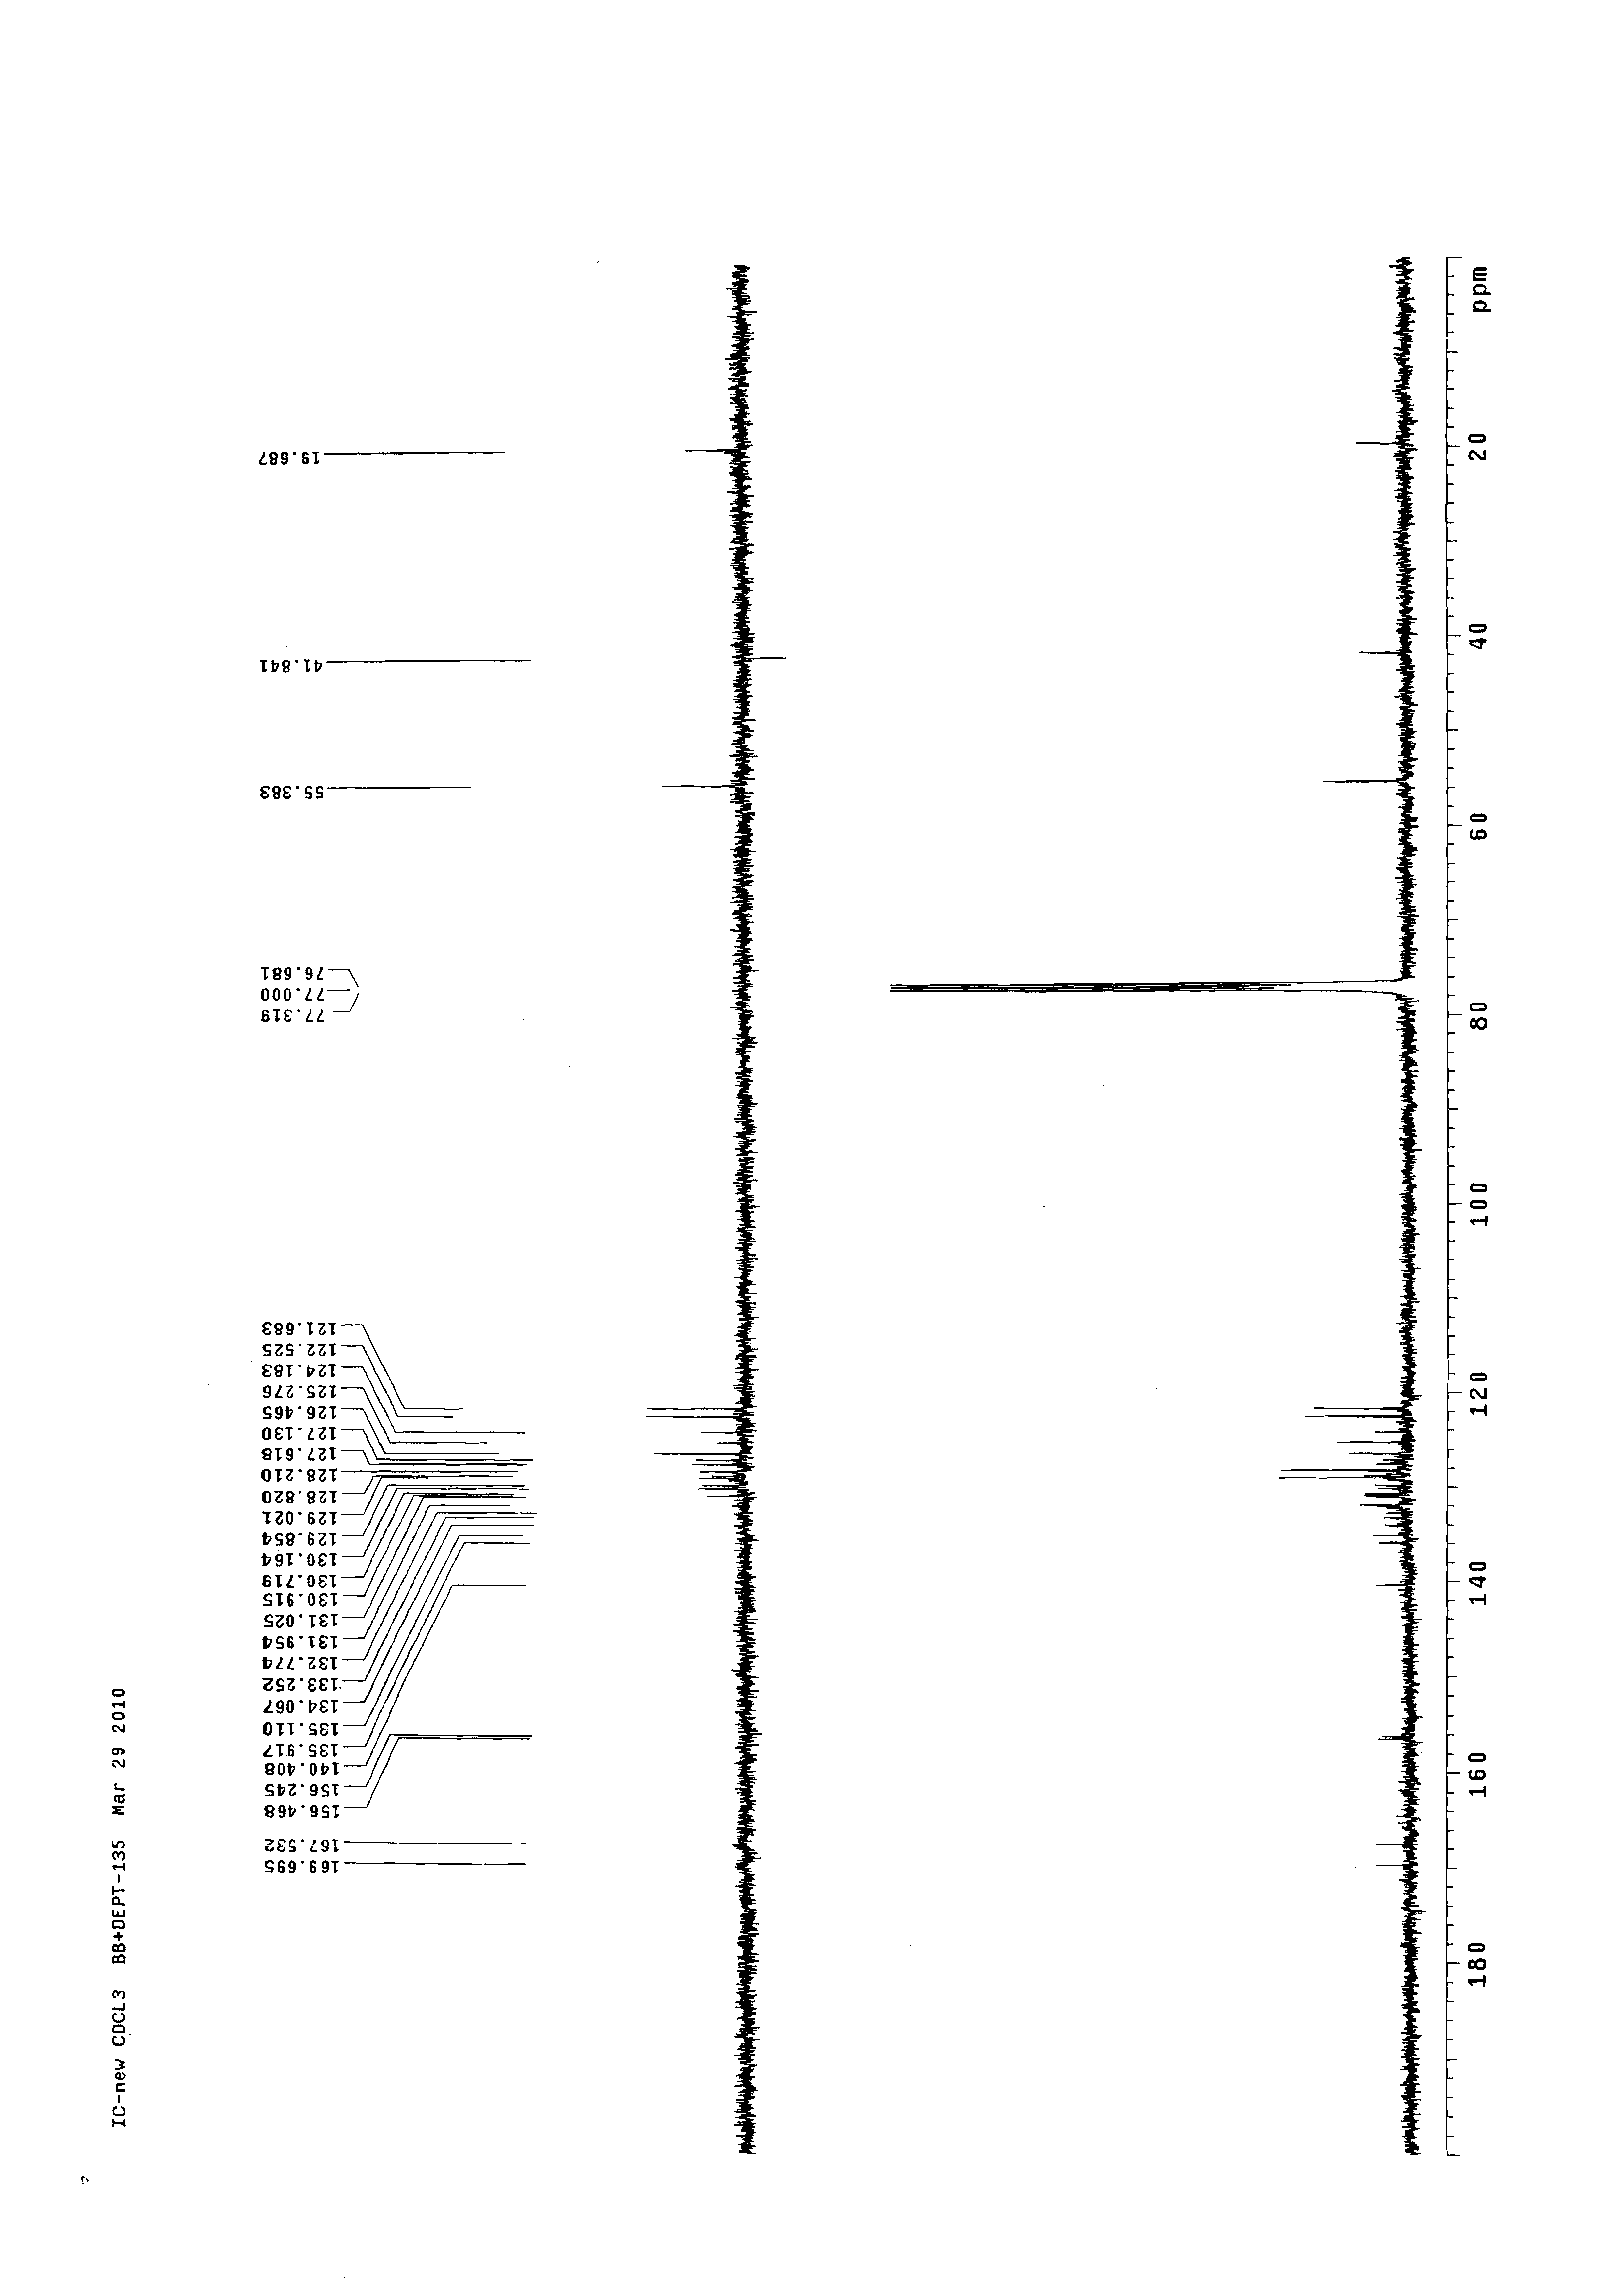


**4-methyl-2-(2-(2-oxo-2-(4-(trifluoromethyl)phenylamino)ethyl)phenyl)-*N*-(4-(trifluoromethyl)phenyl)-1-naphthamide (2g)**


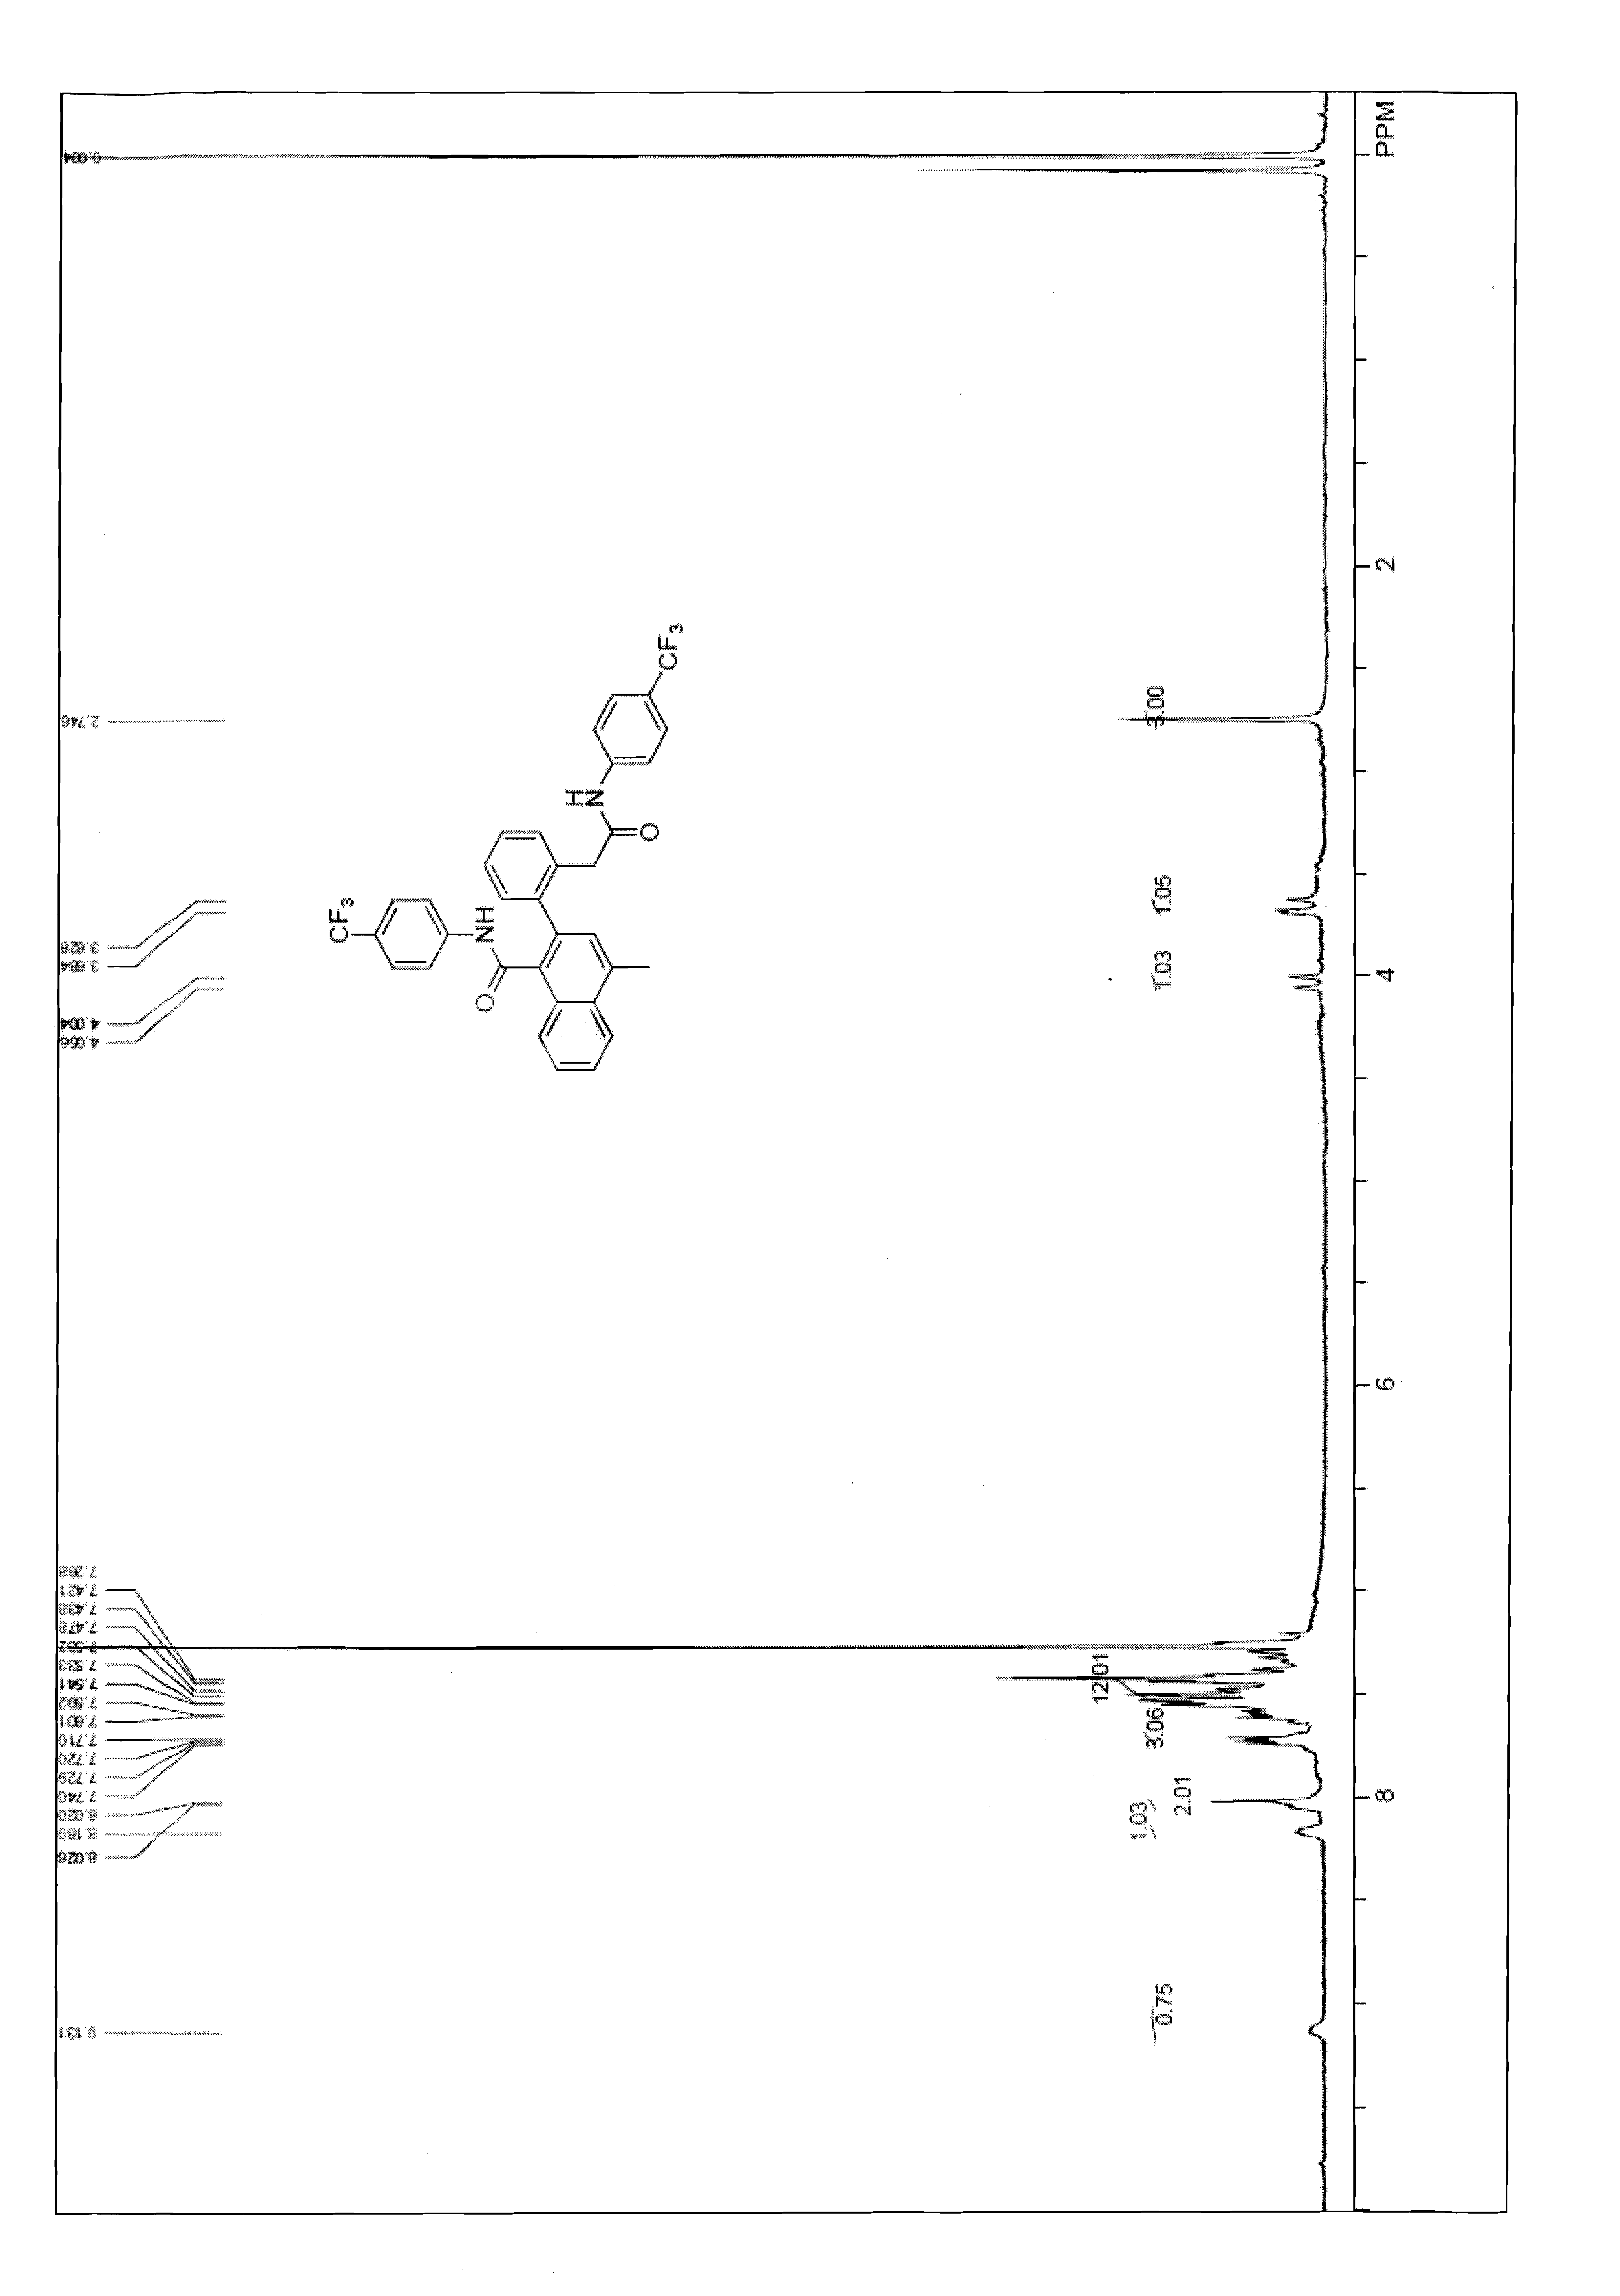


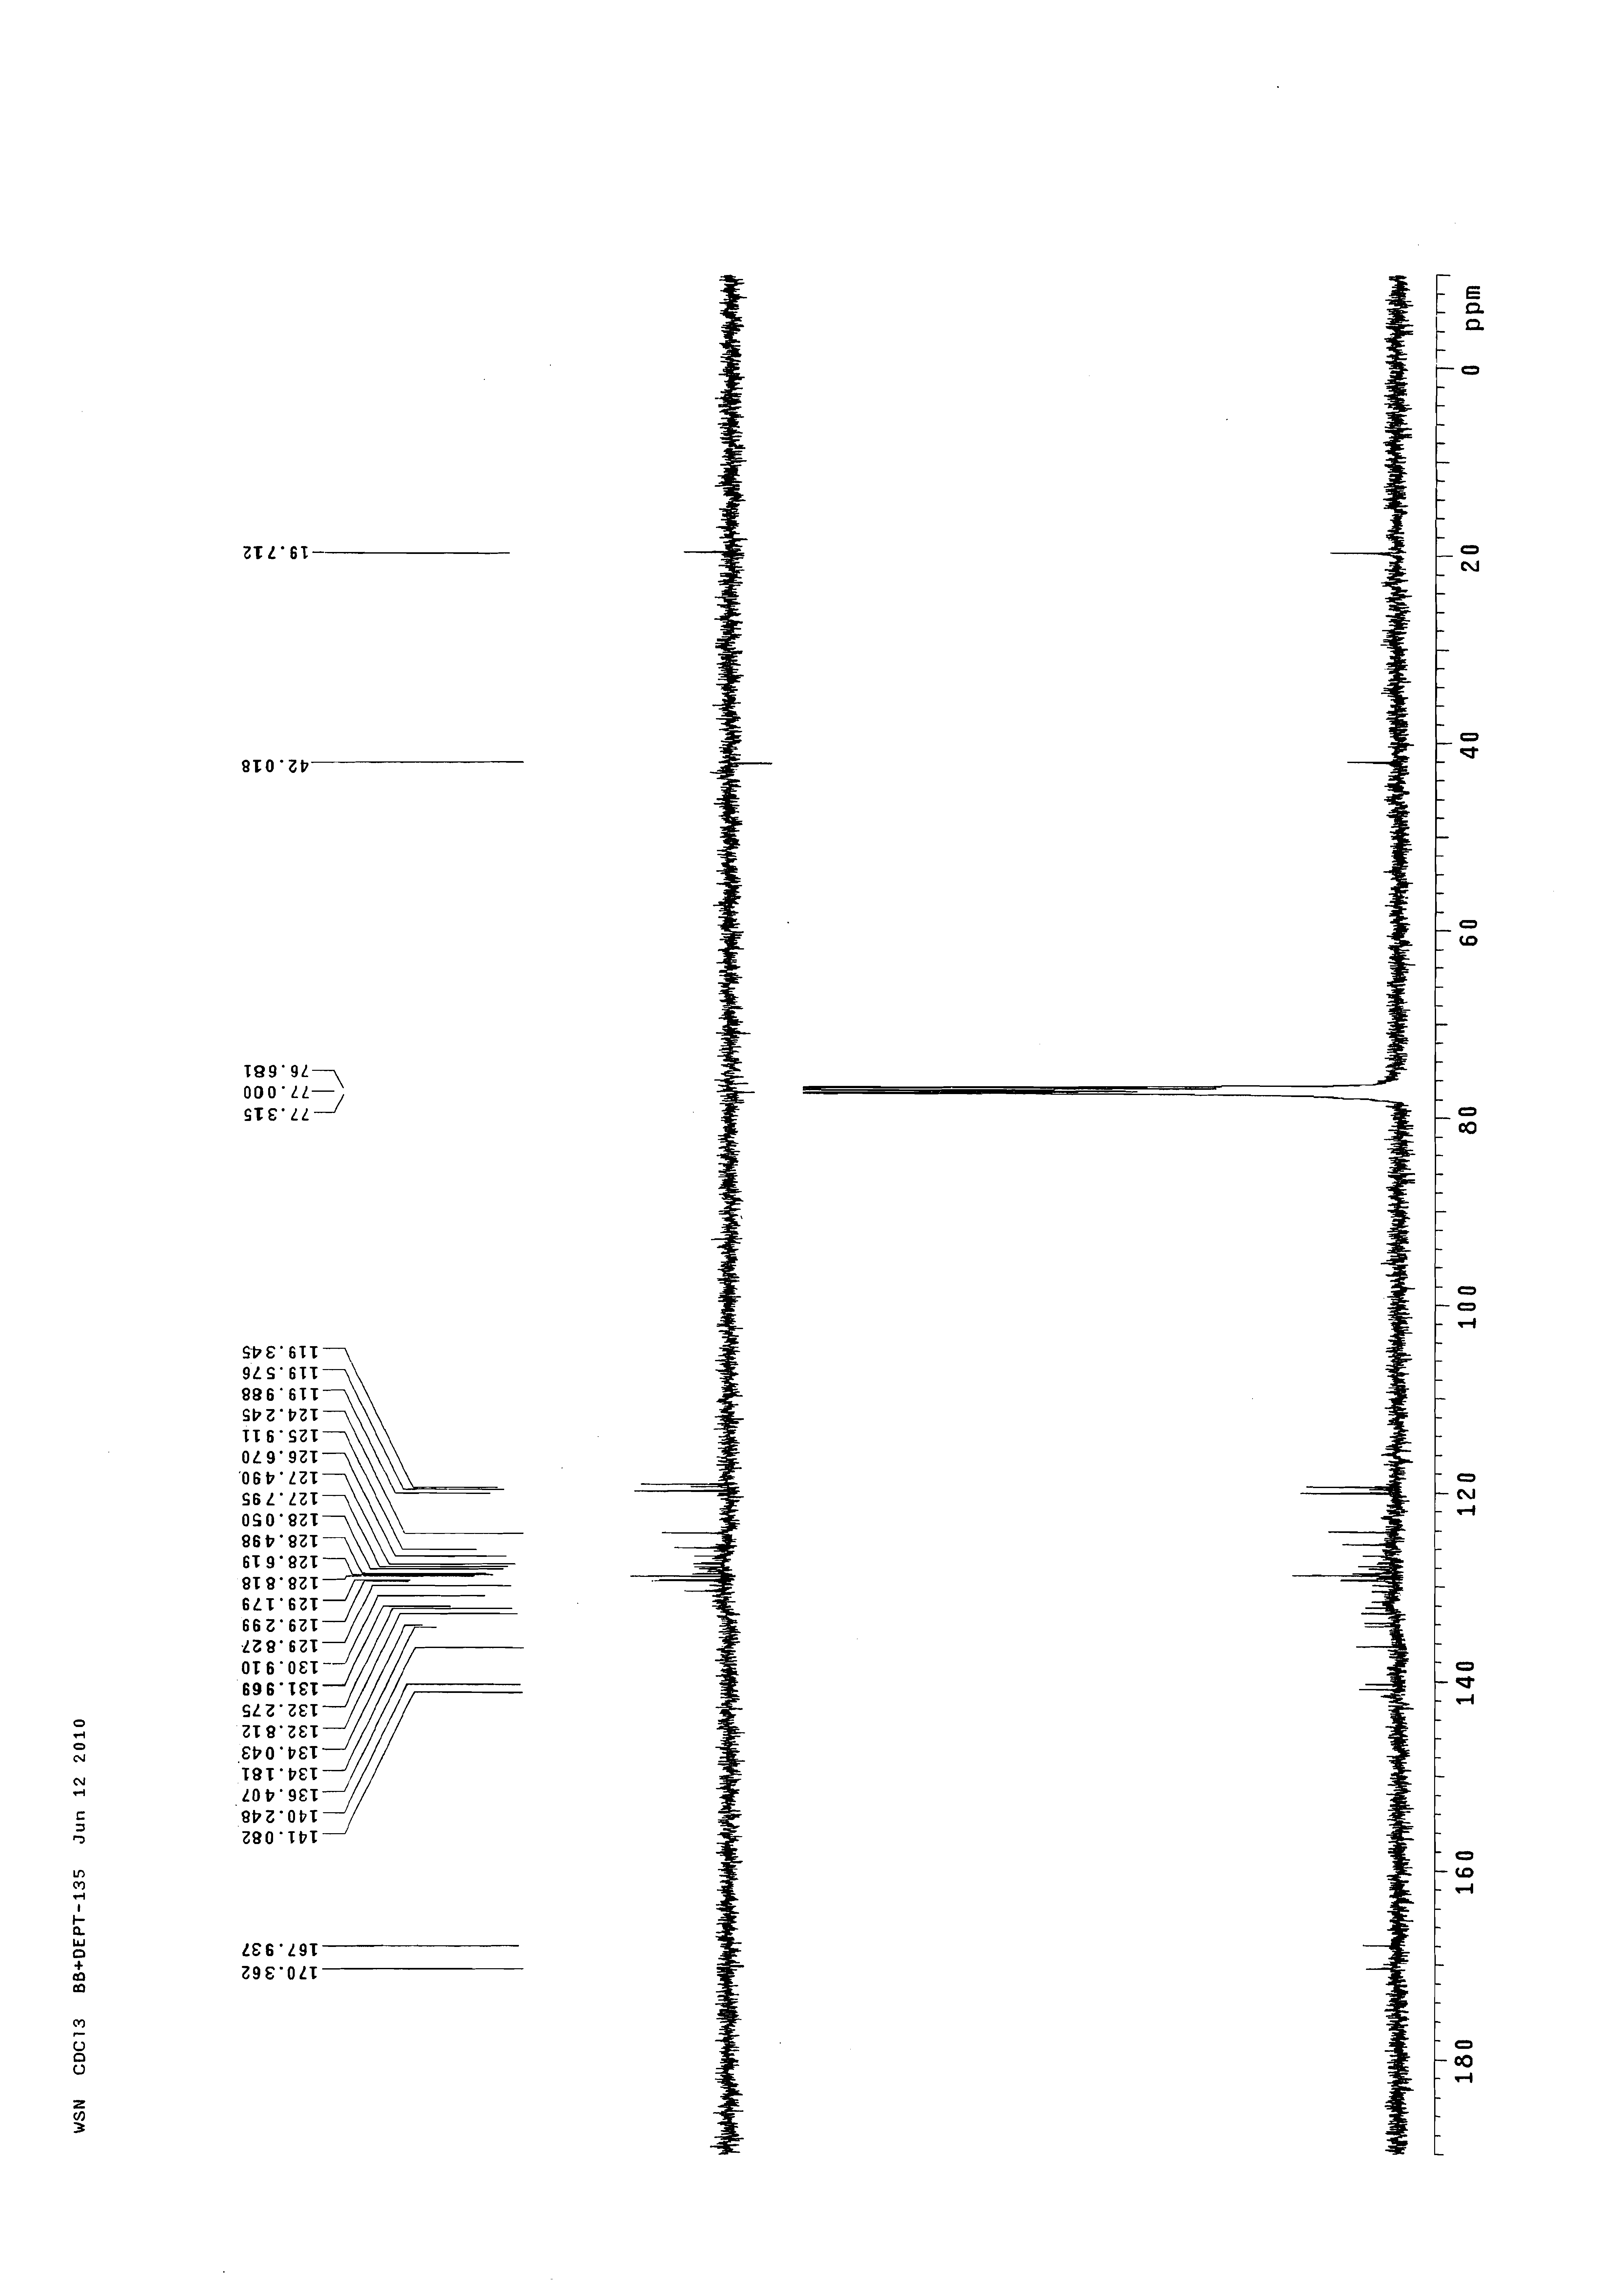


**methyl 2-(2-(2-methoxy-2-oxoethyl)phenyl)-4-methyl-1-naphthoate (2i)**


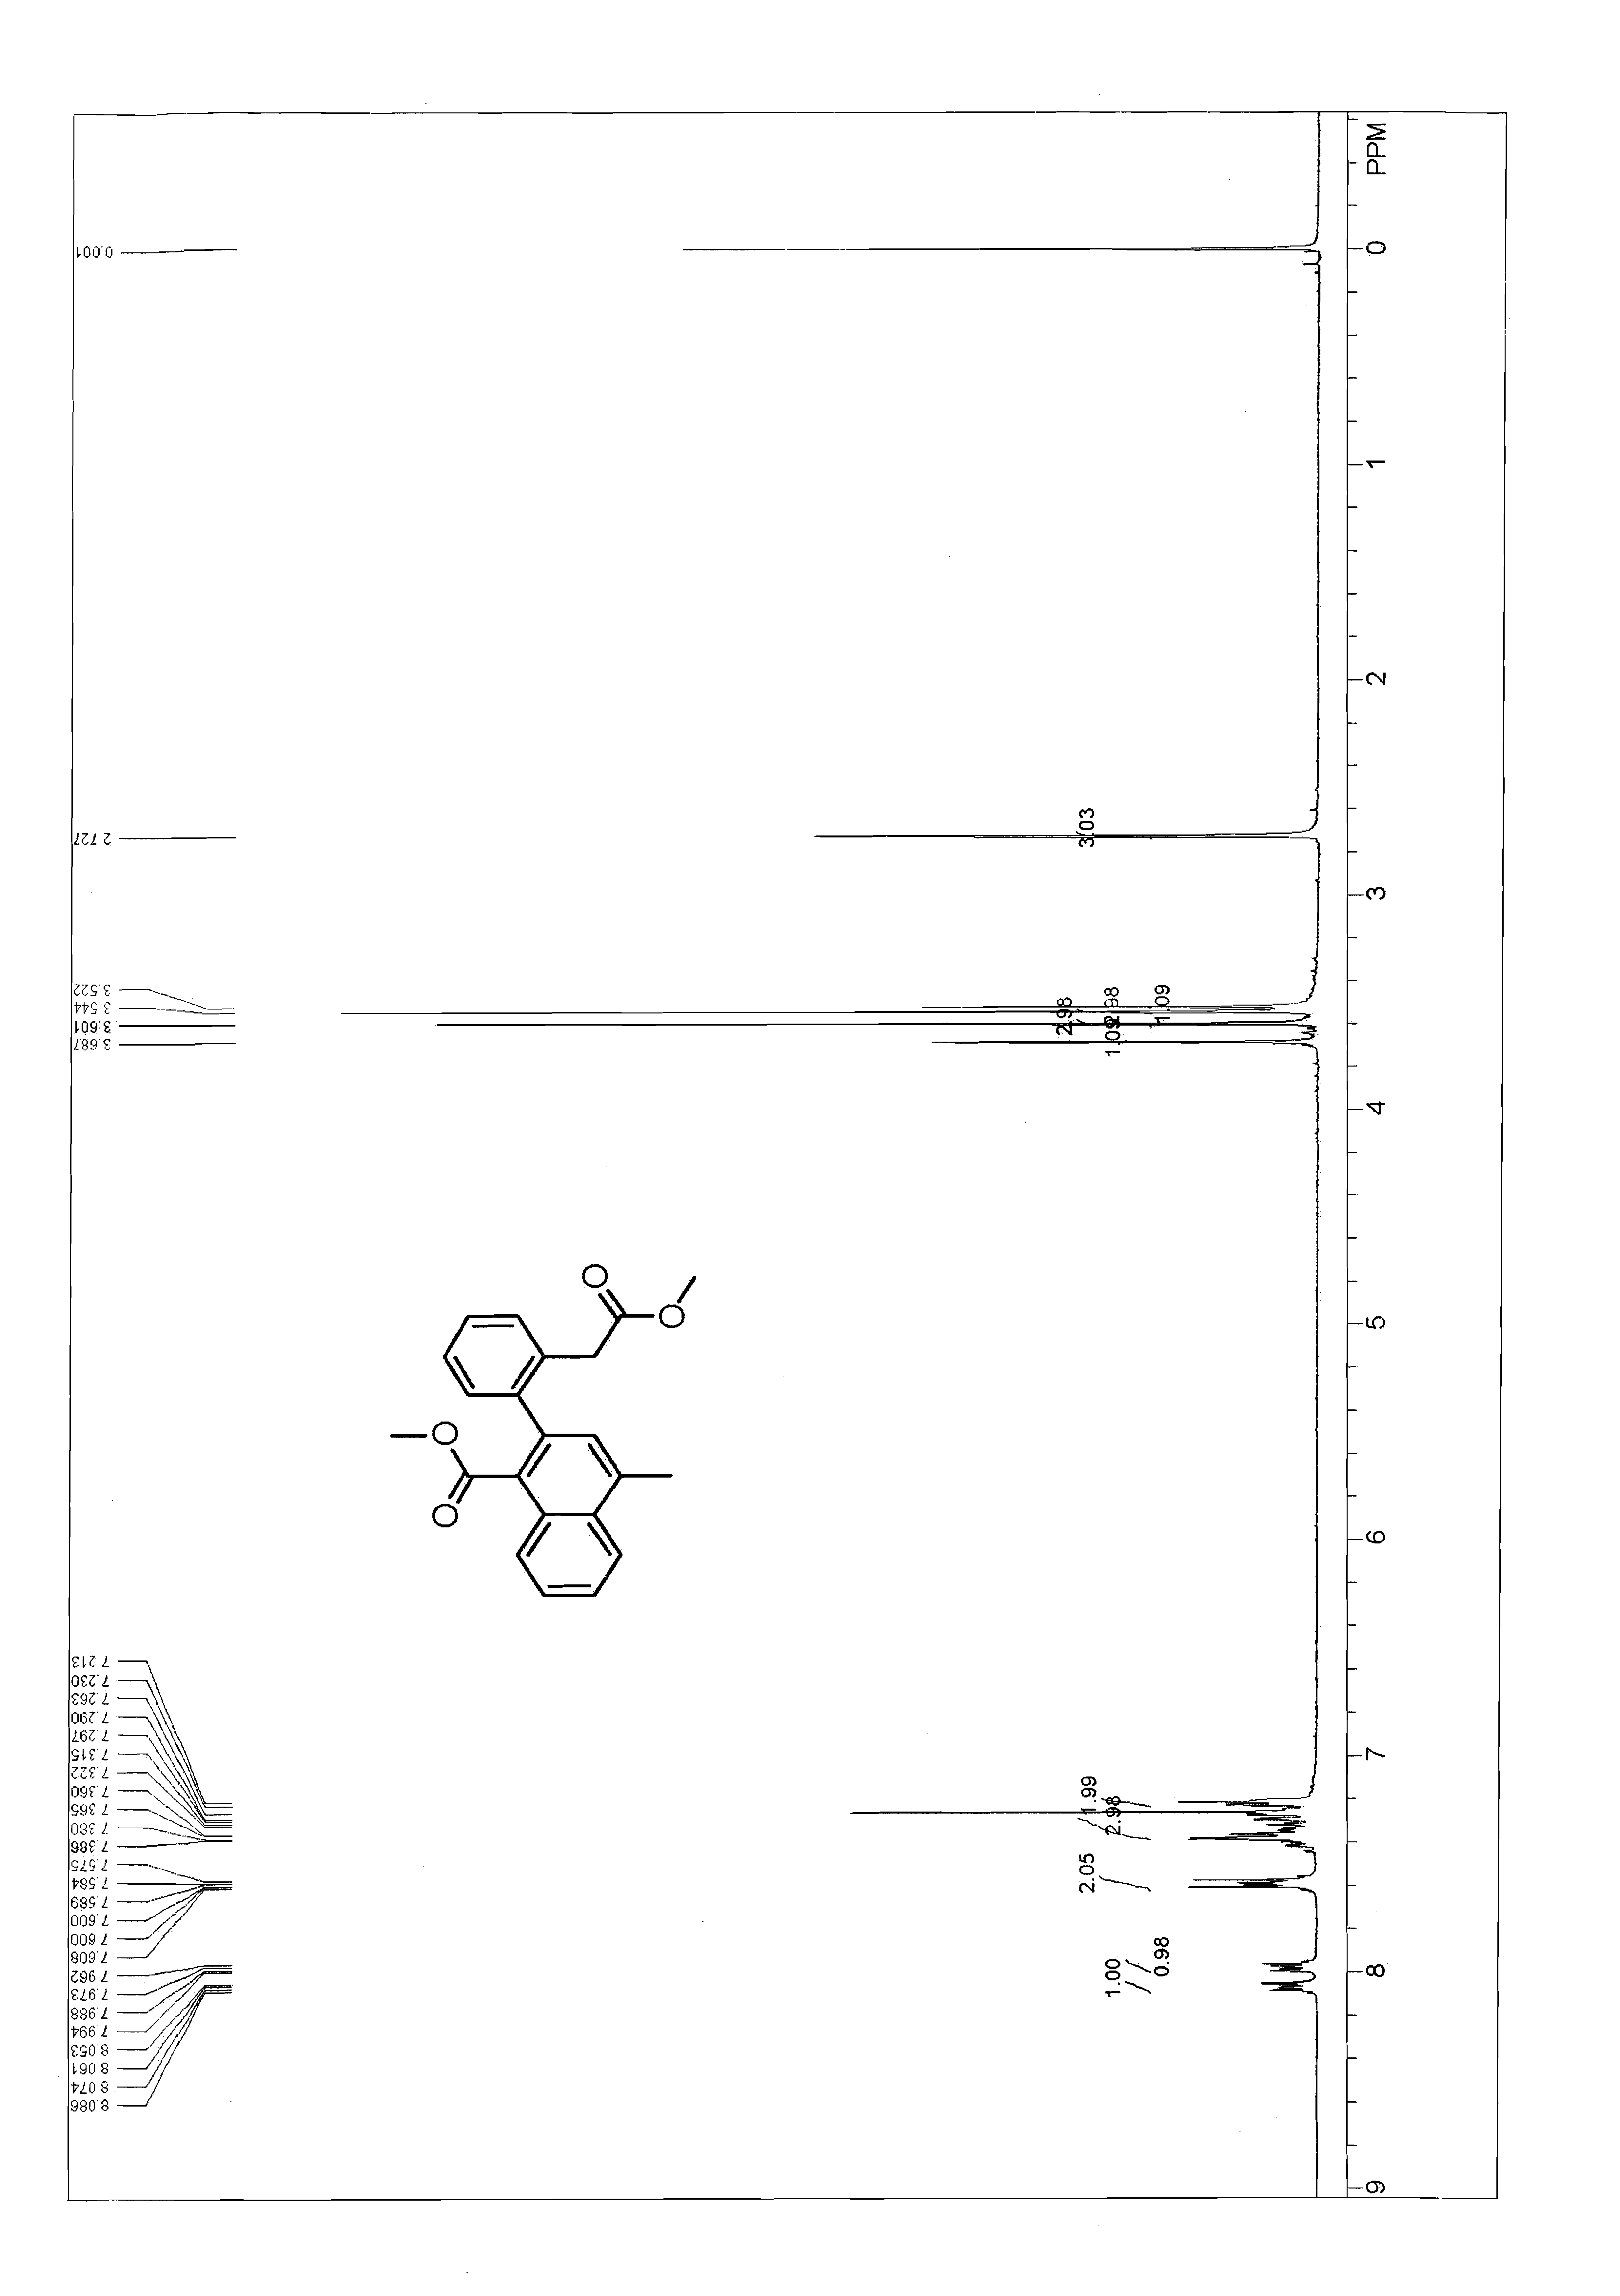


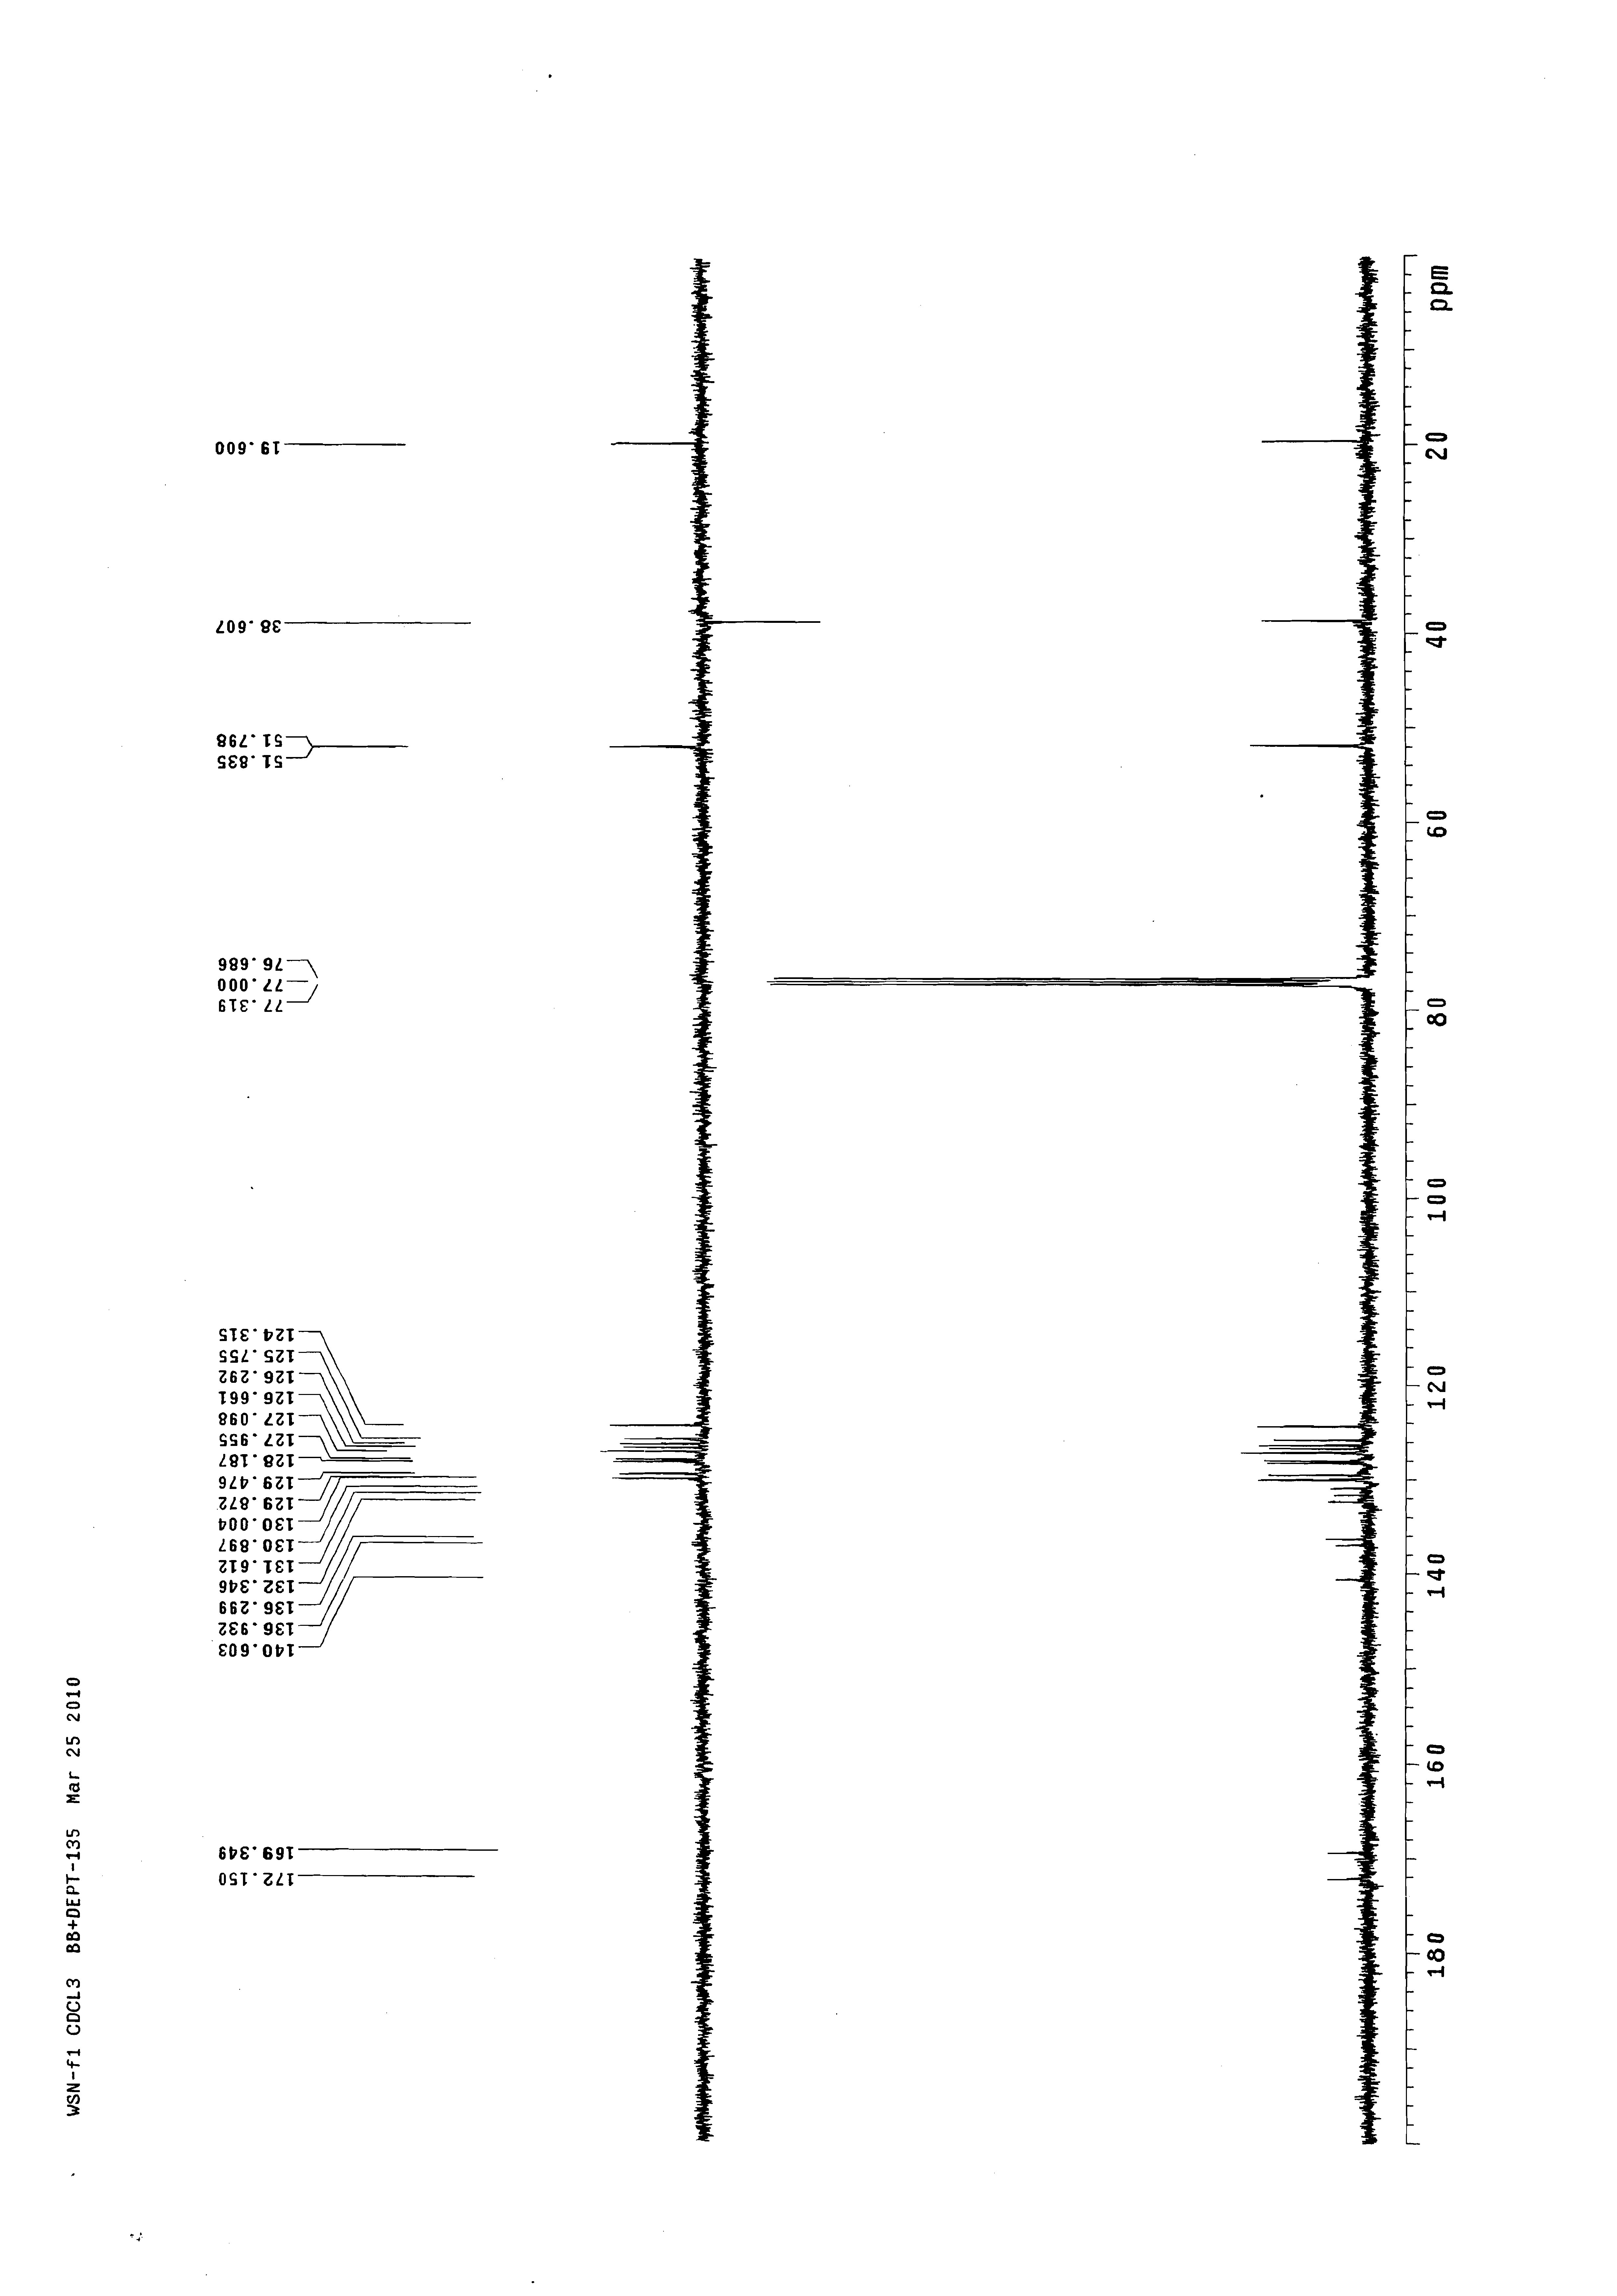


***N*-butyl-2-(2-(2-(butylamino)-2-oxoethyl)-4-methoxyphenyl)-7-methoxy-4-methyl-1-naphthamide (2j)**

**
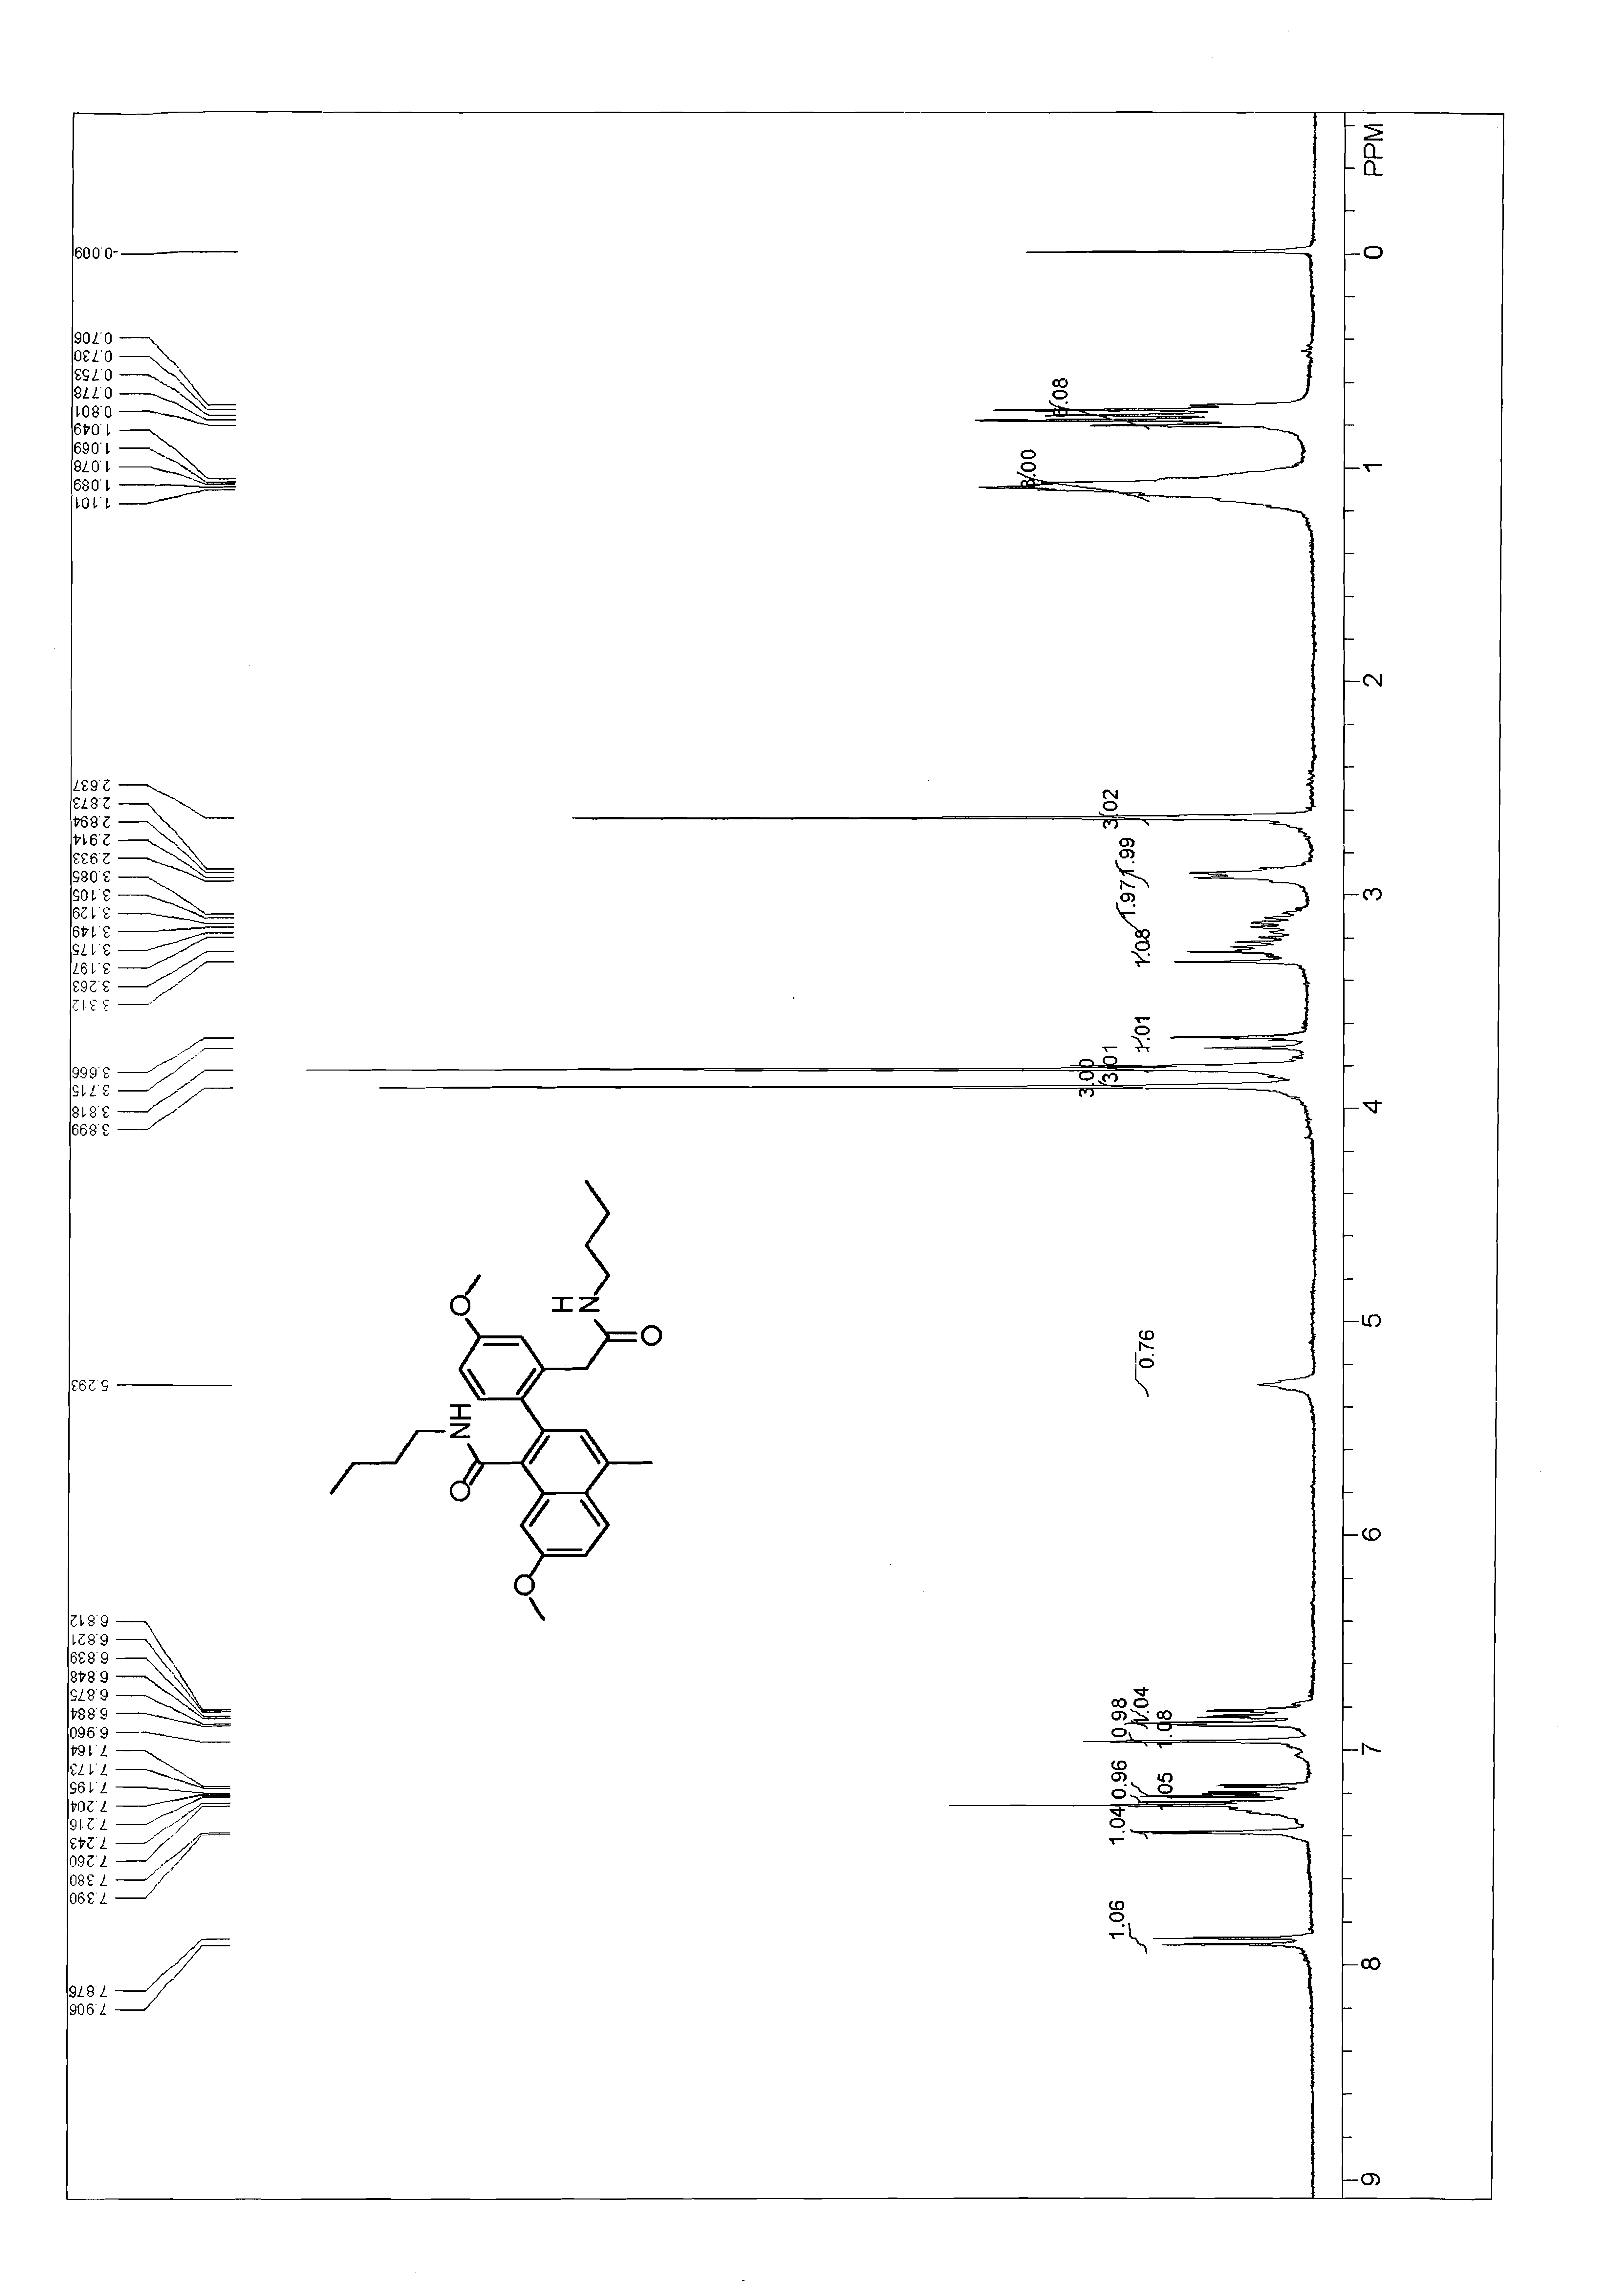
**

**
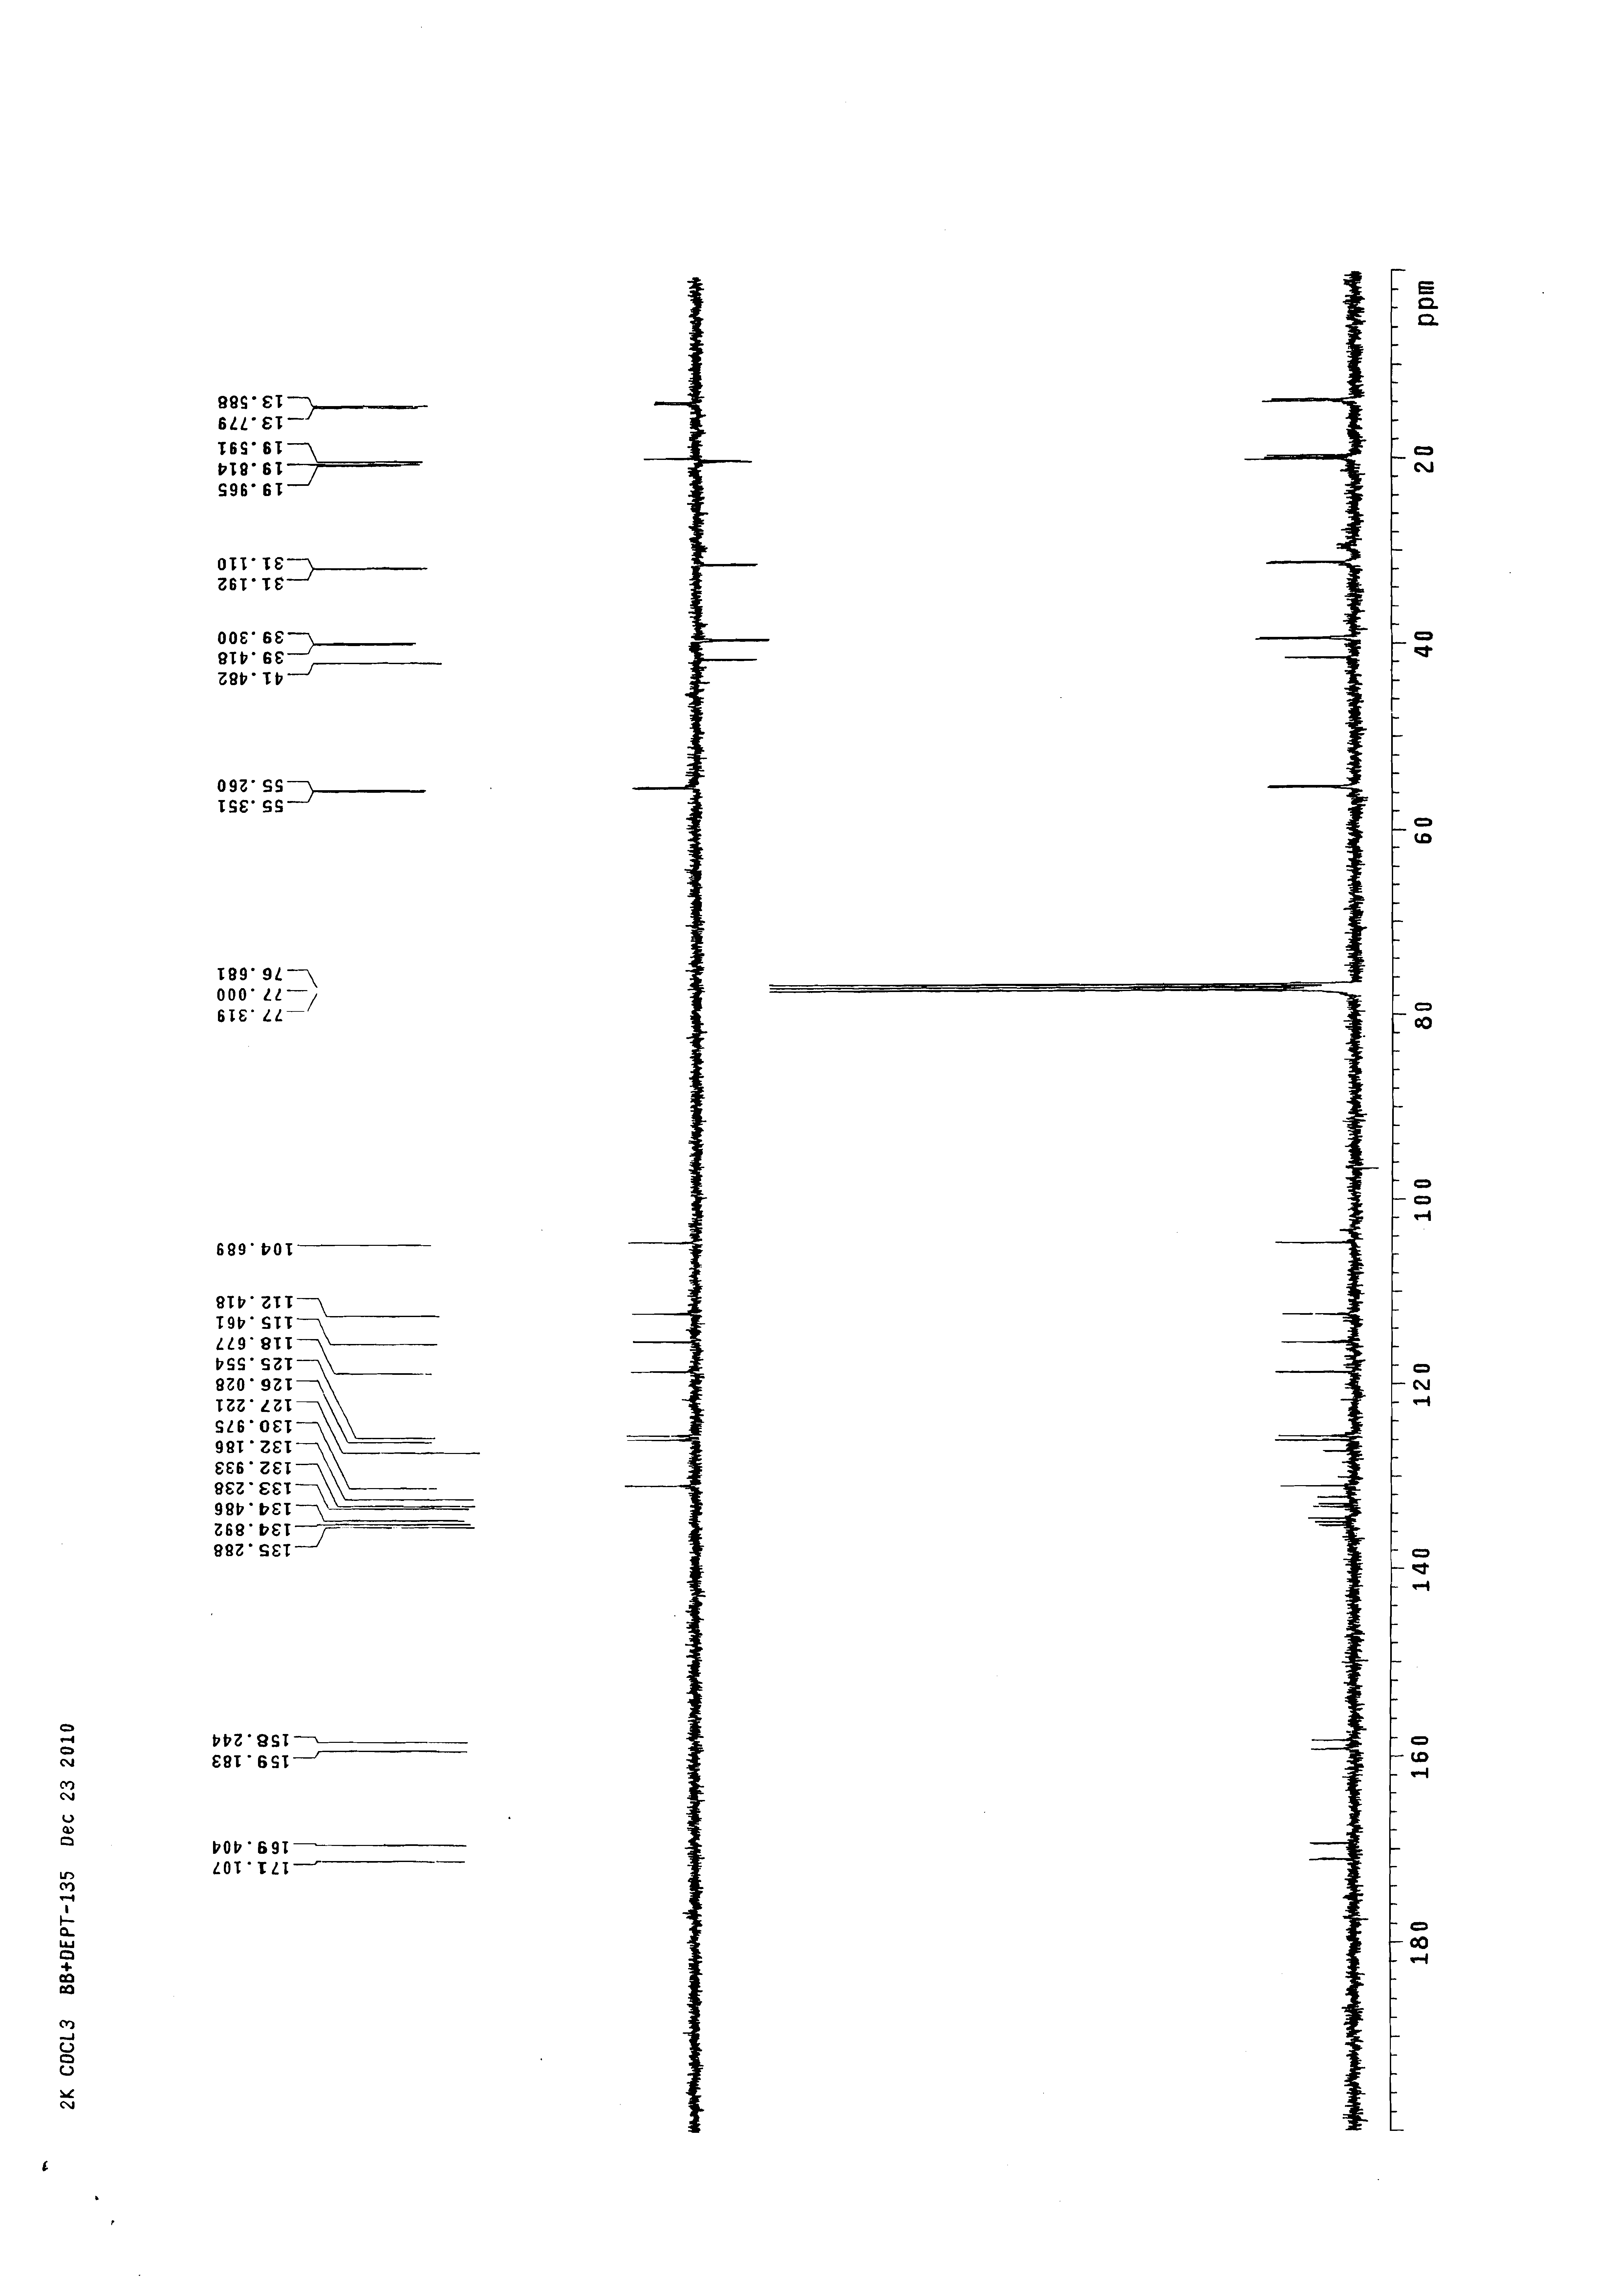
**

***N*-butyl-2-(2-(2-(butylamino)-2-oxoethyl)-5-methoxyphenyl)-6-methoxy-4-methyl-1-naphthamide (2k)**

***
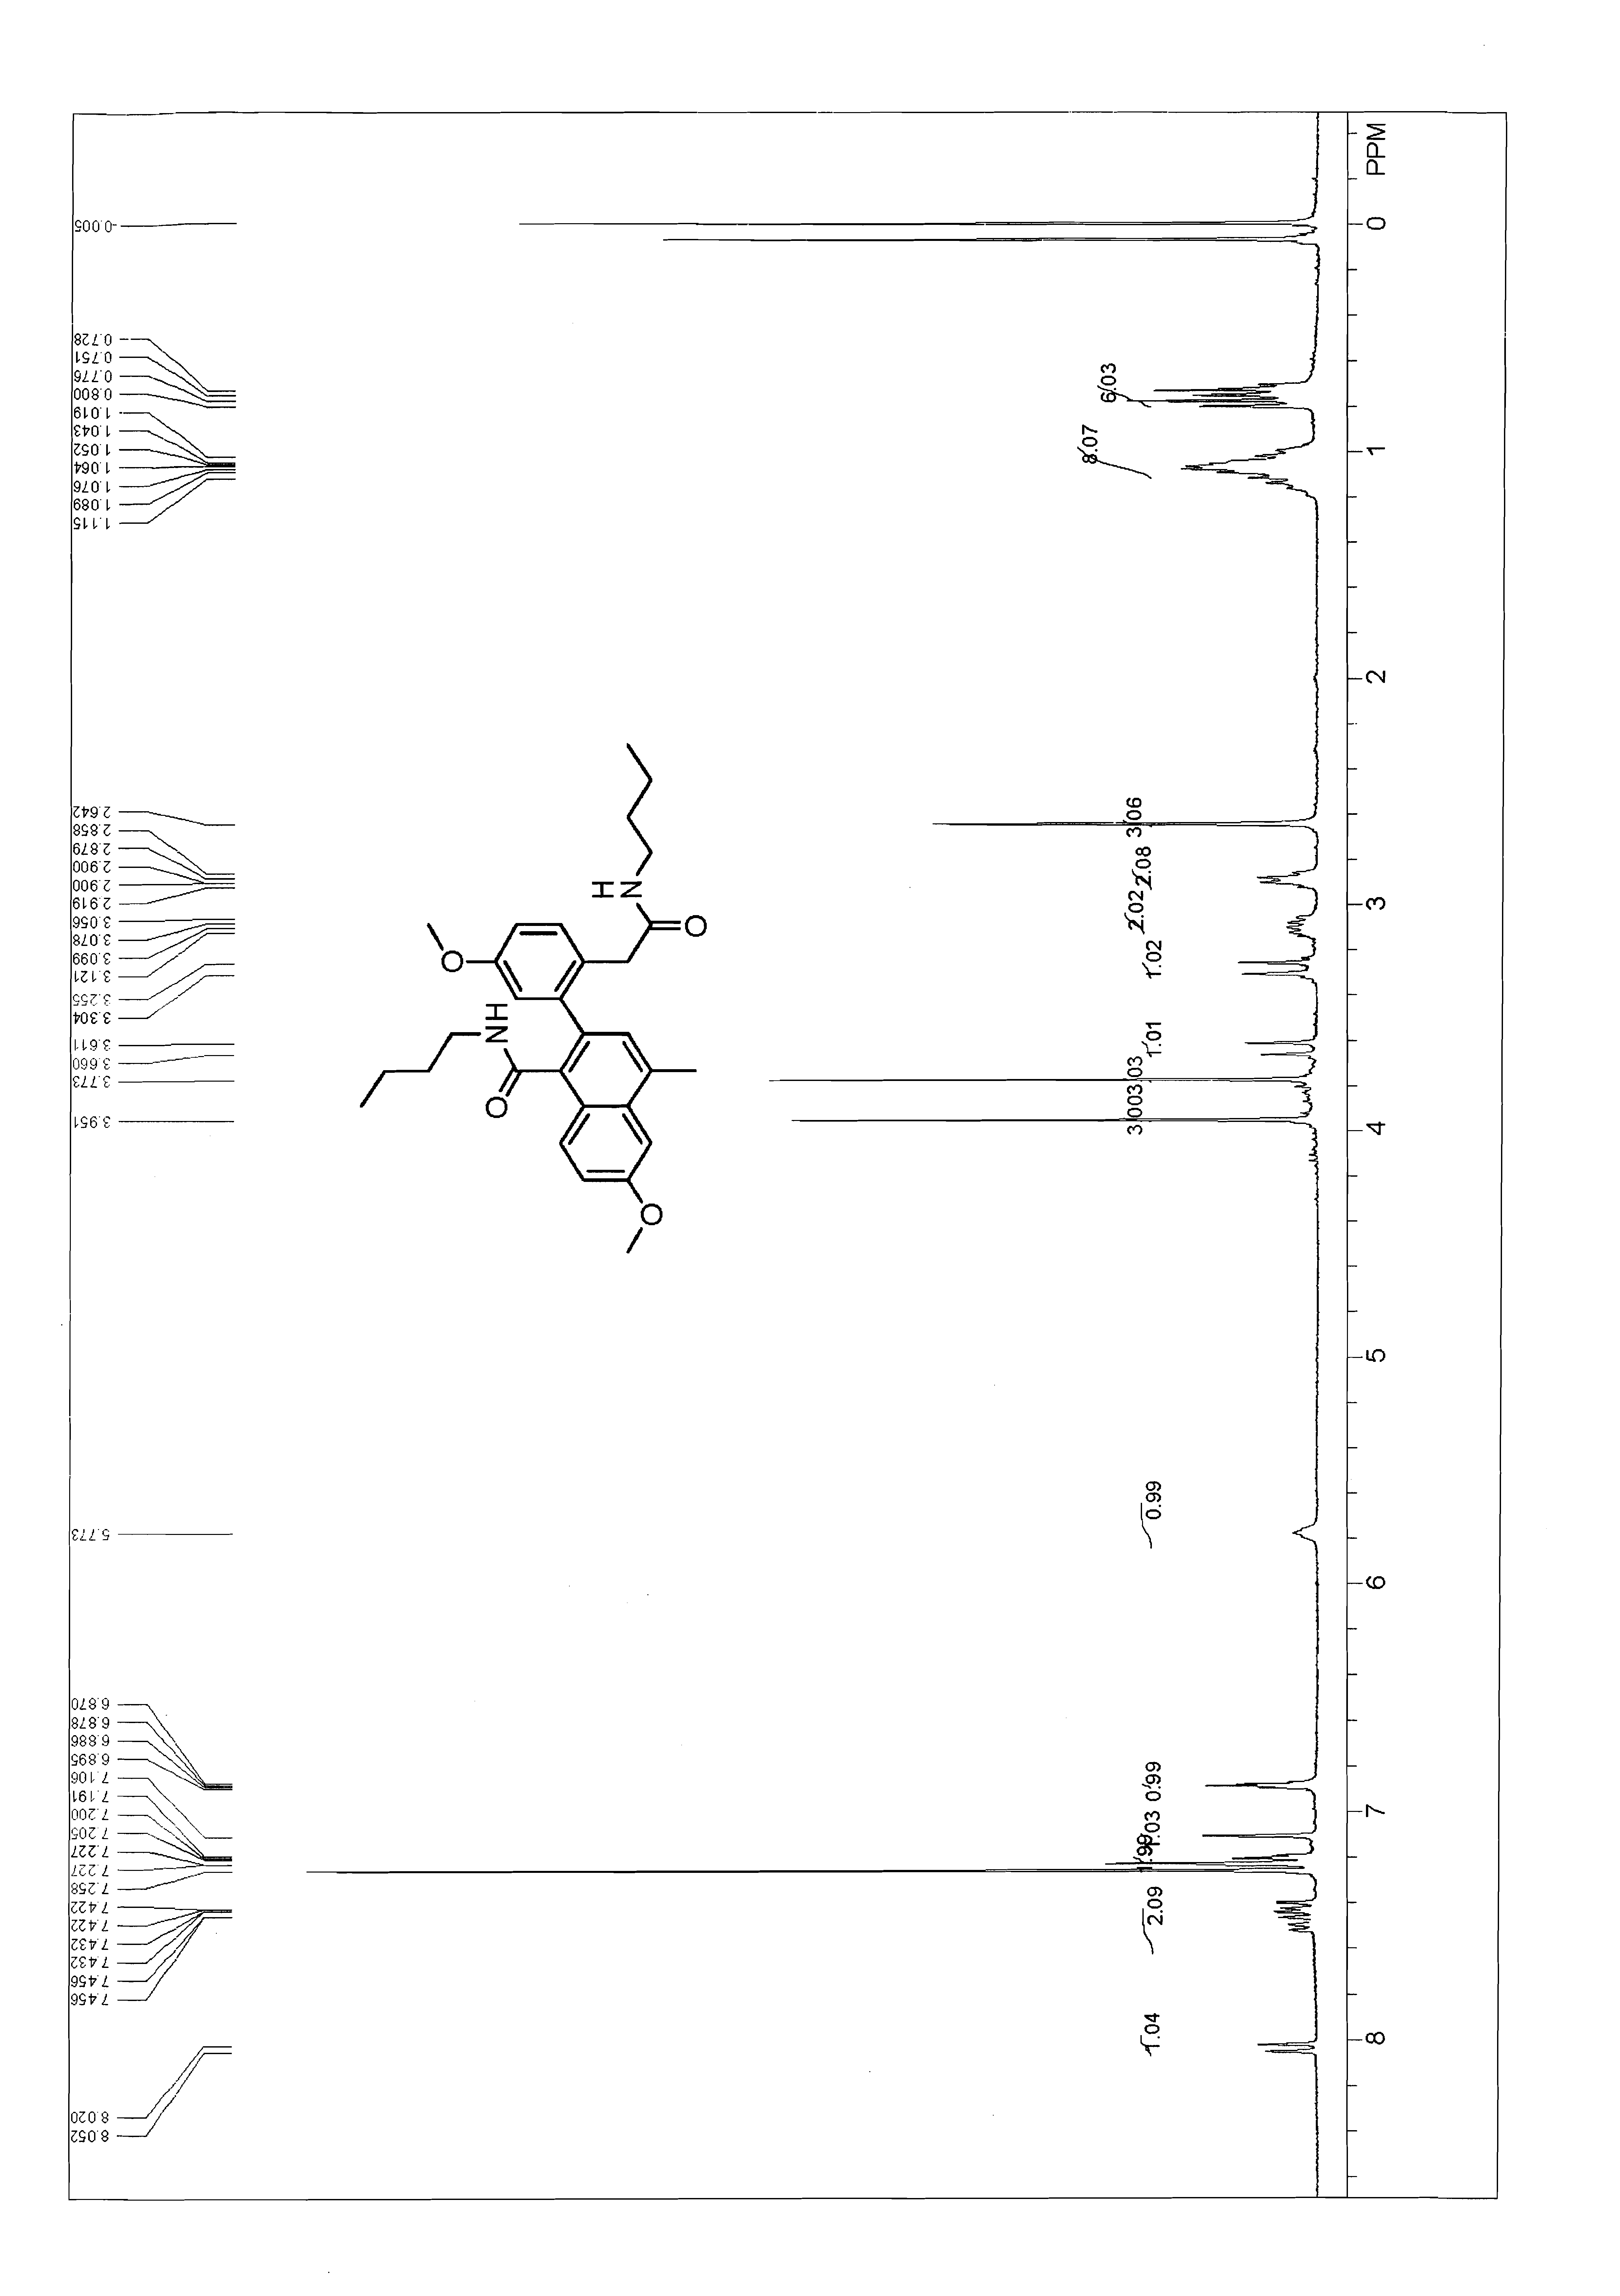
***

***
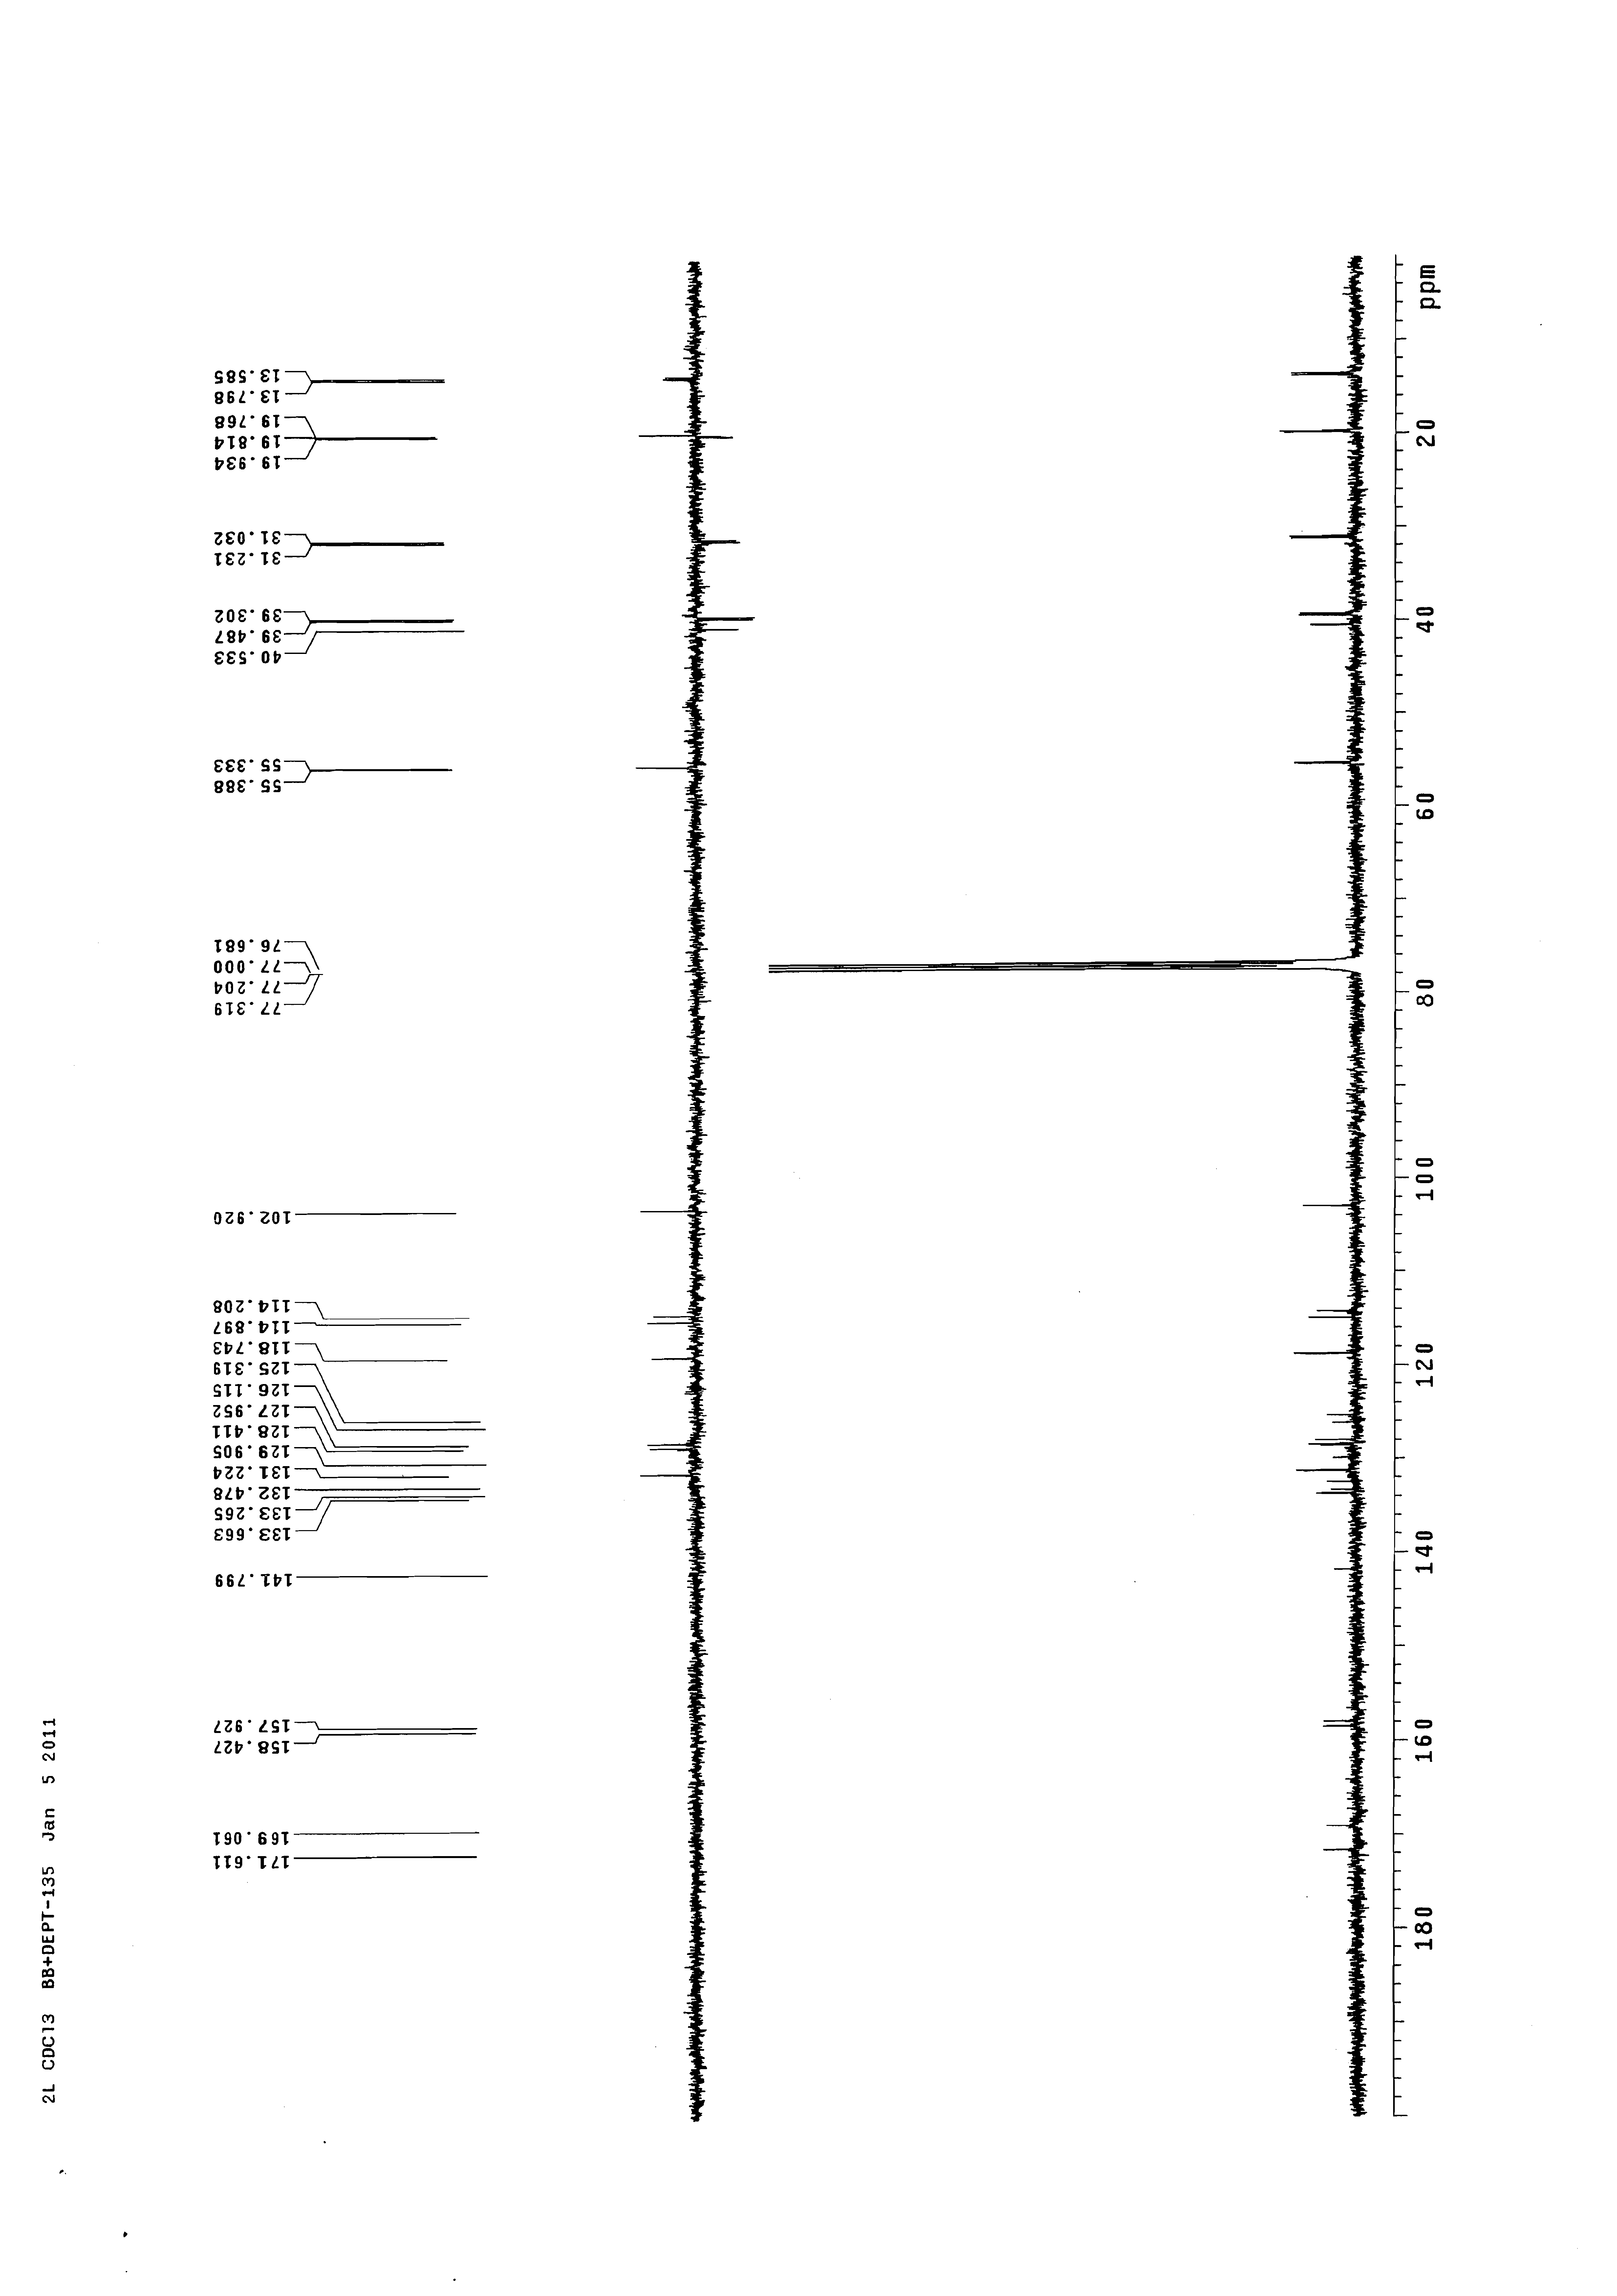
***

***N*-butyl-2-(2-(2-(butylamino)-2-oxoethyl)-4,5-dimethoxyphenyl)-6,7-dimethoxy-4-methyl-1-naphthamide (2l)**


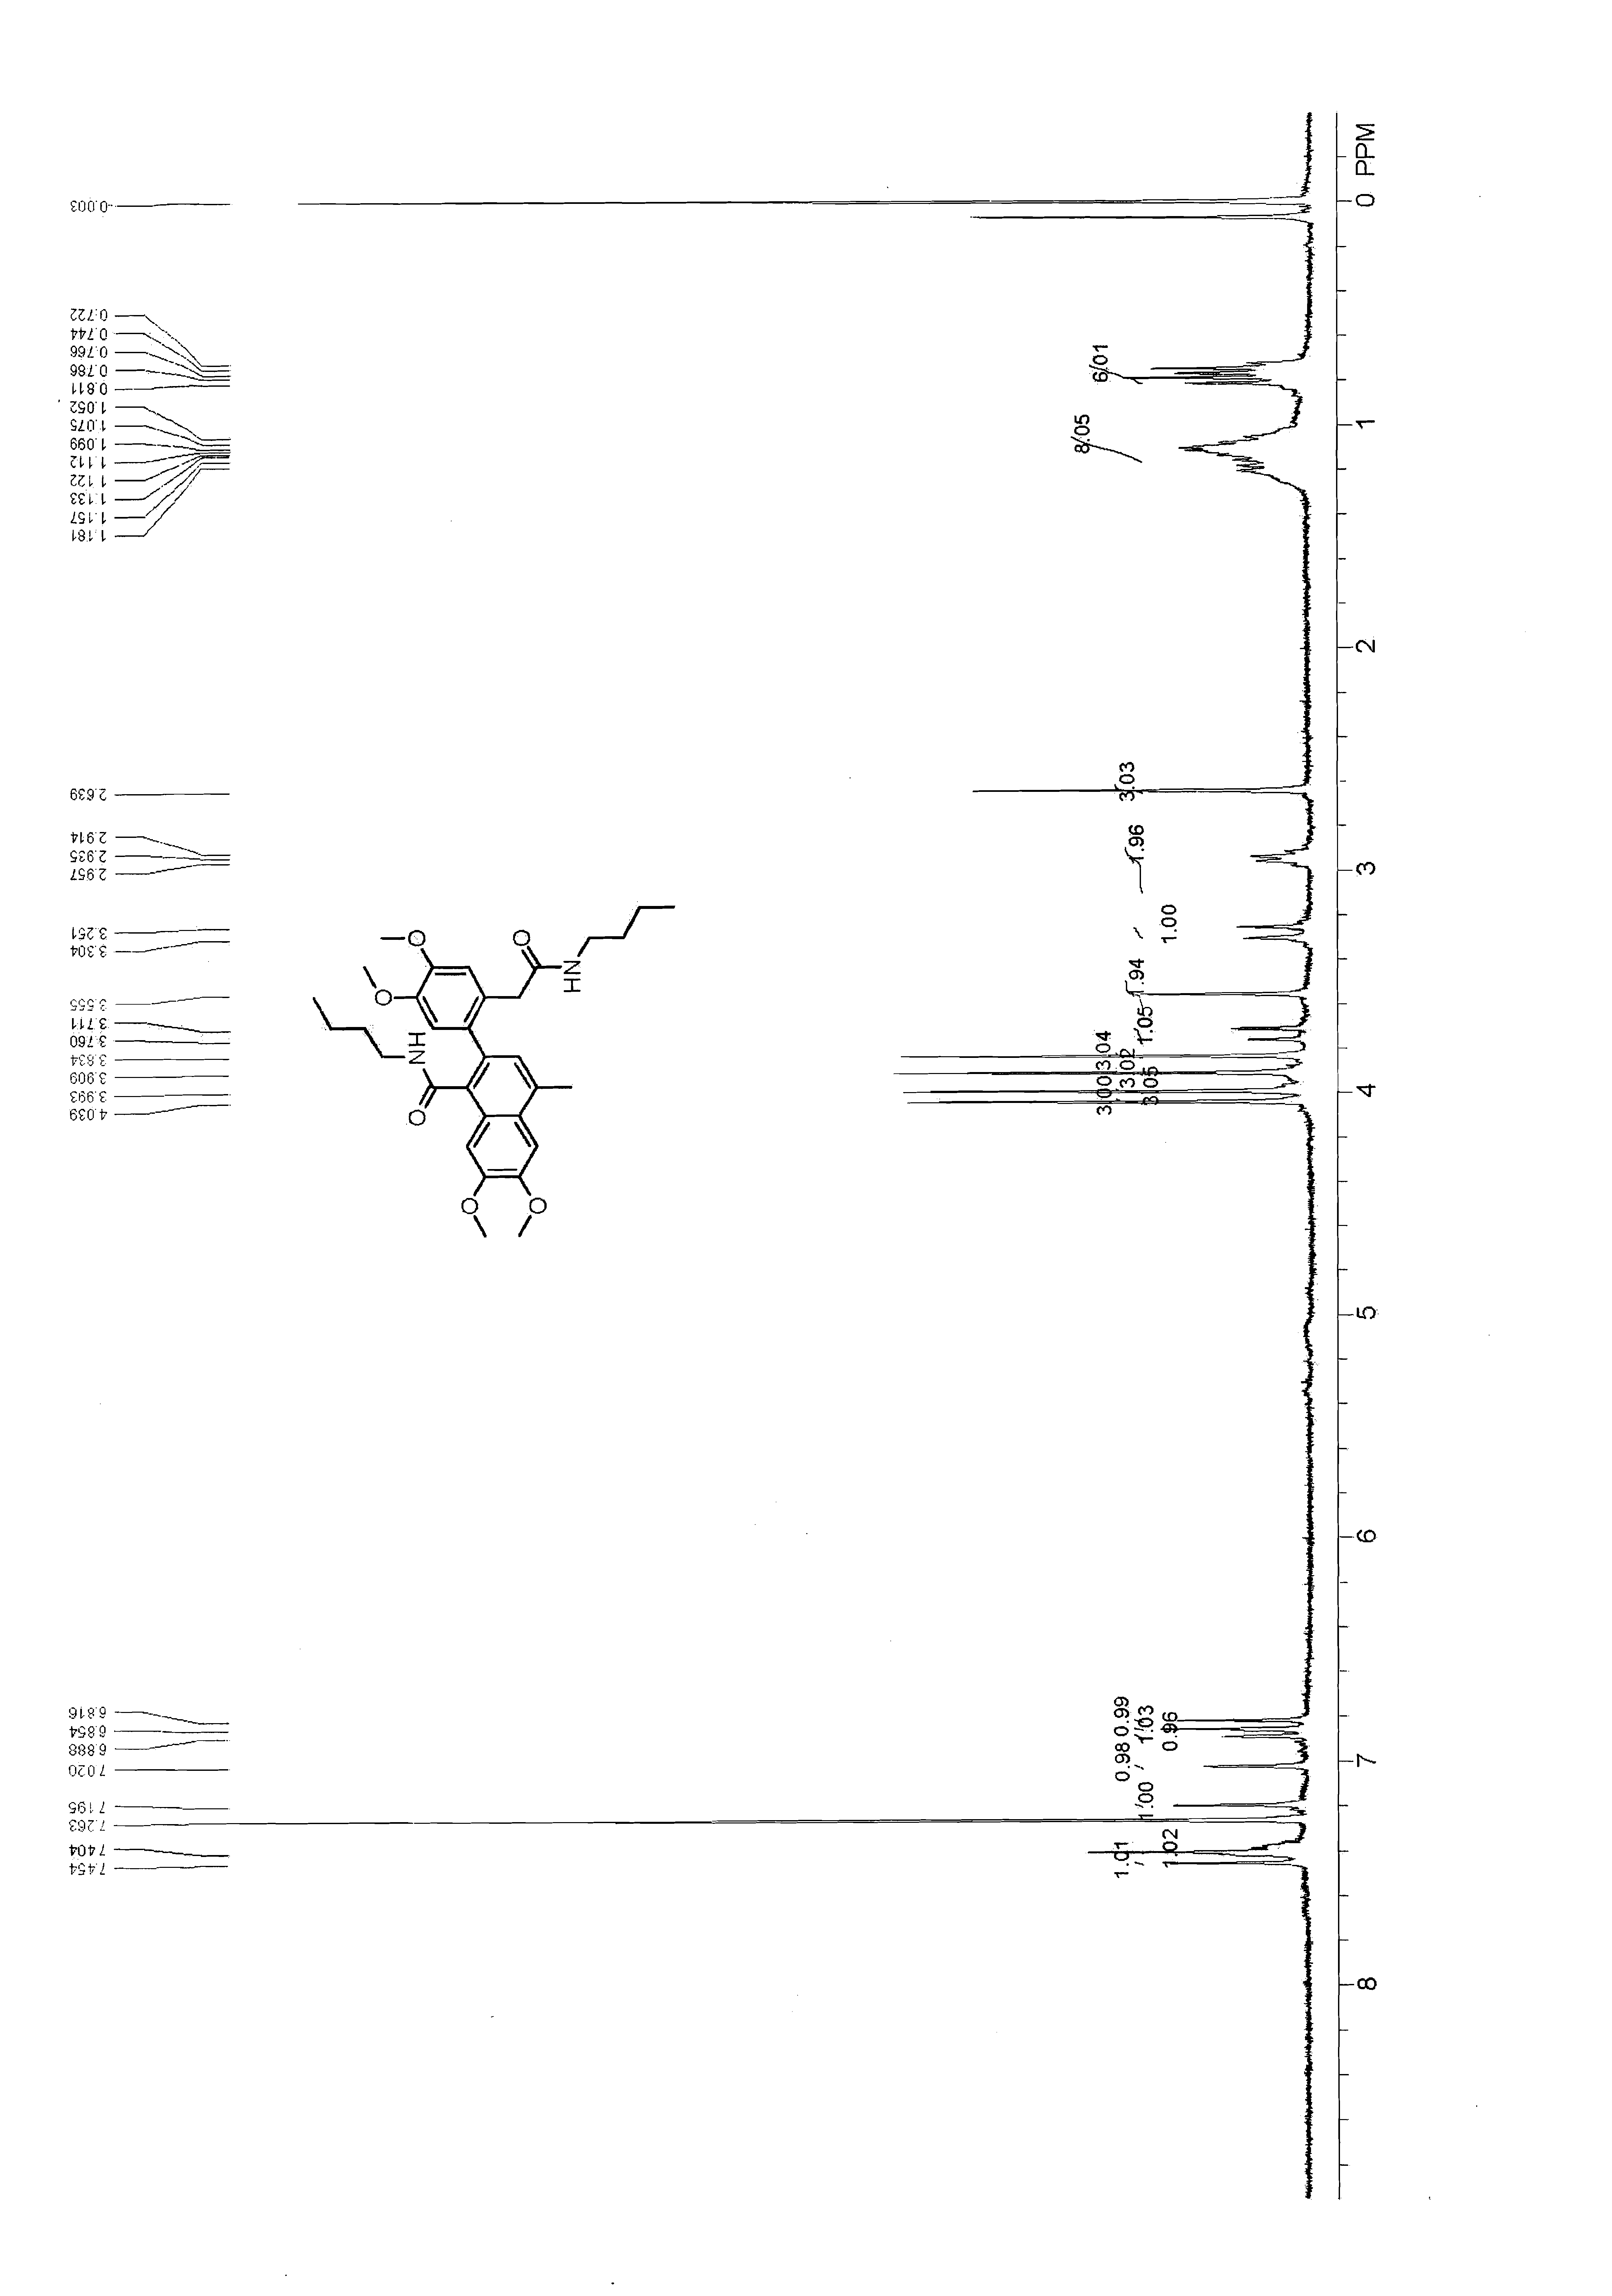


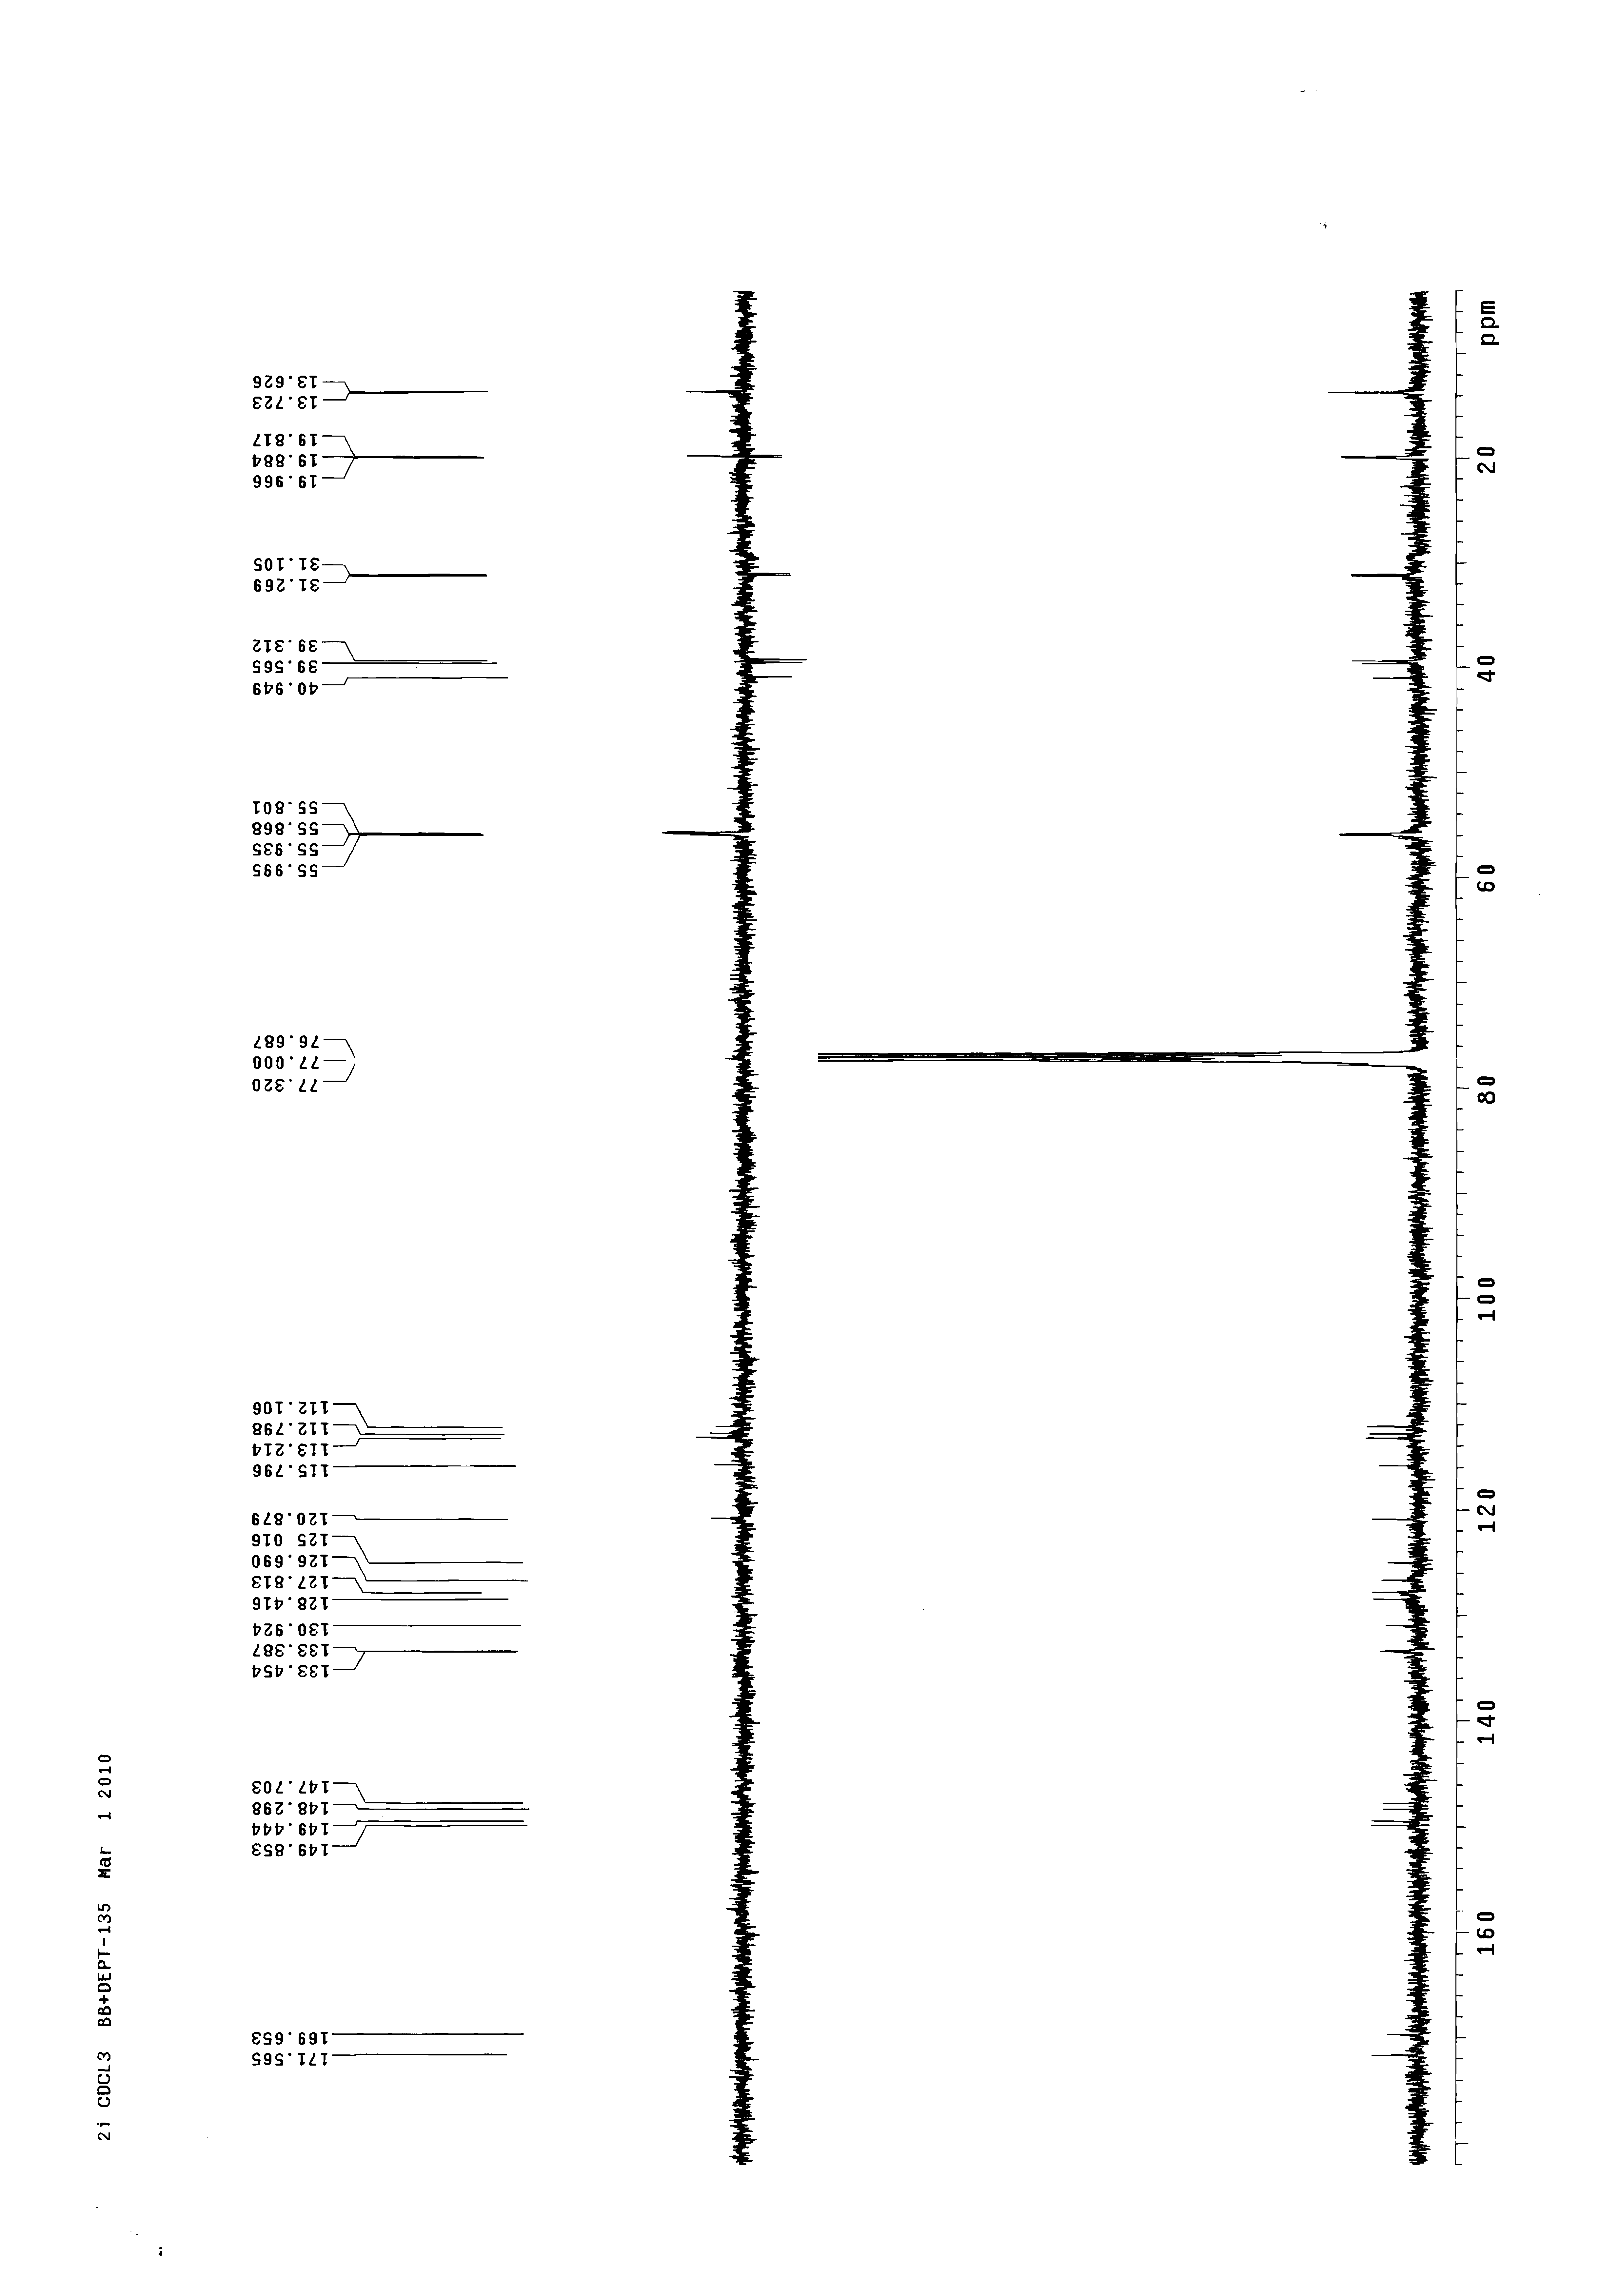


***N*-butyl-2-(2-(2-(butylamino)-2-oxoethyl)-4-methylphenyl)-4,7-dimethyl-1-naphthamide (2m)**

**
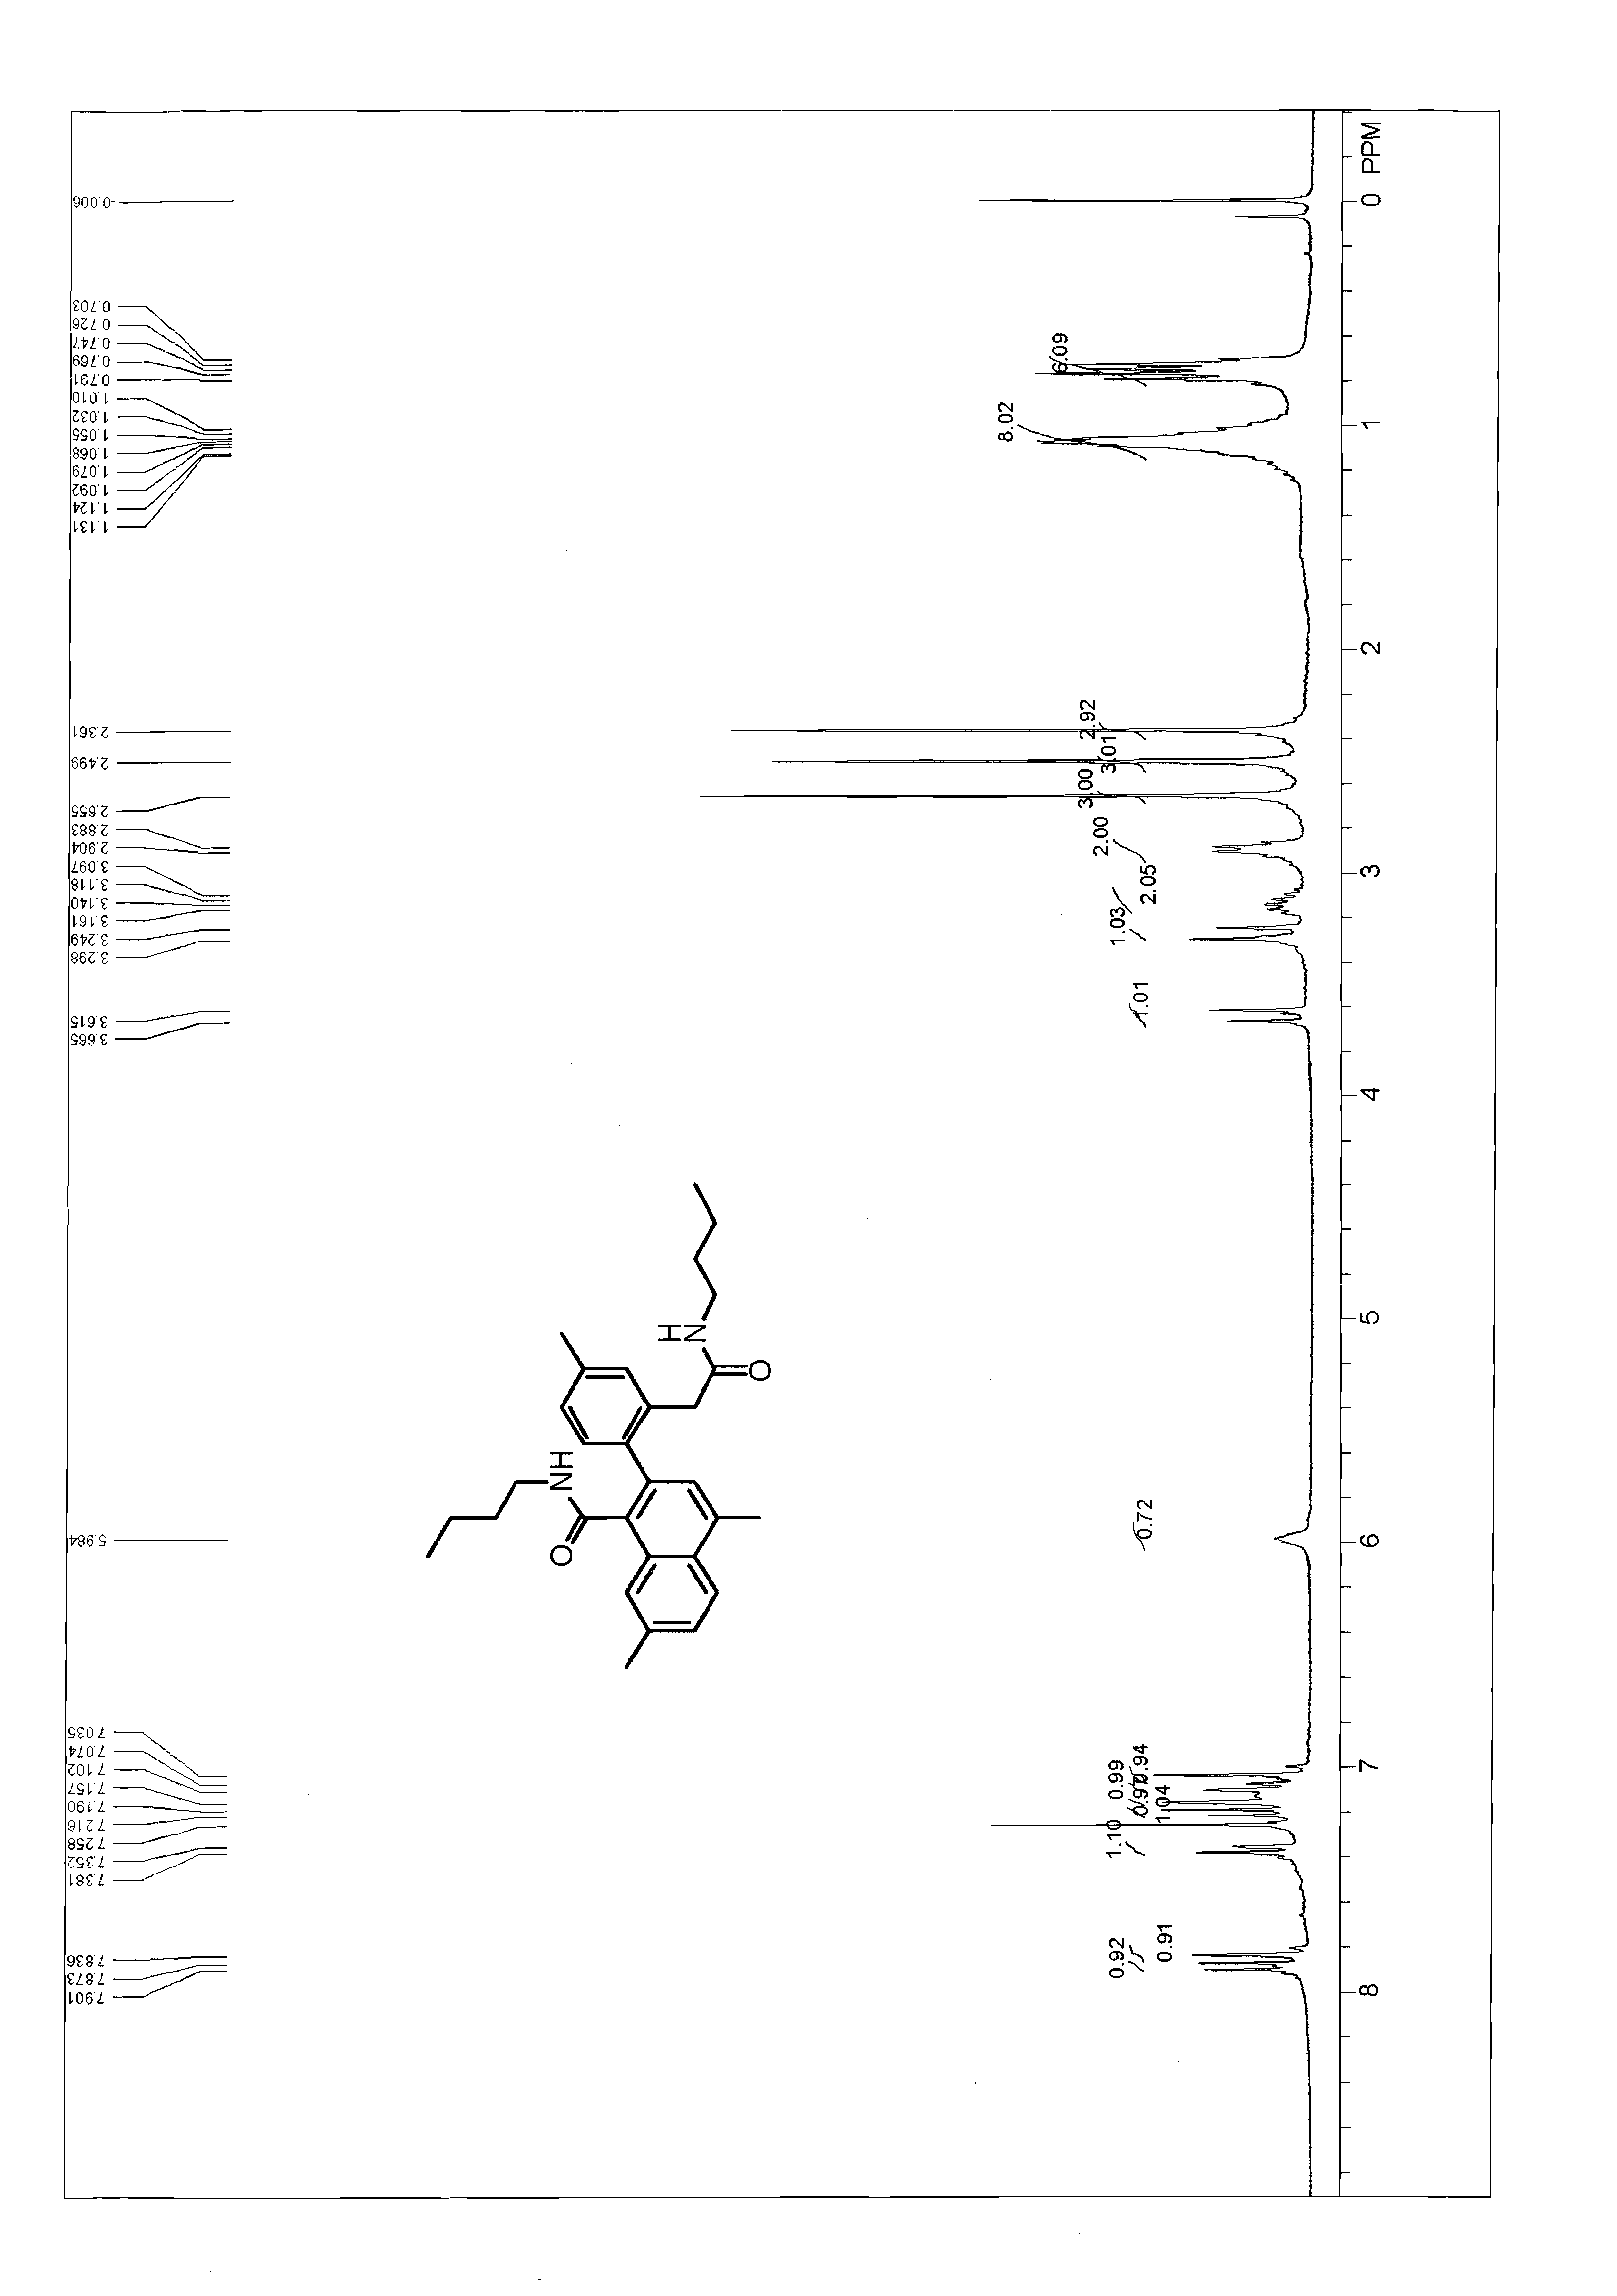
**

**
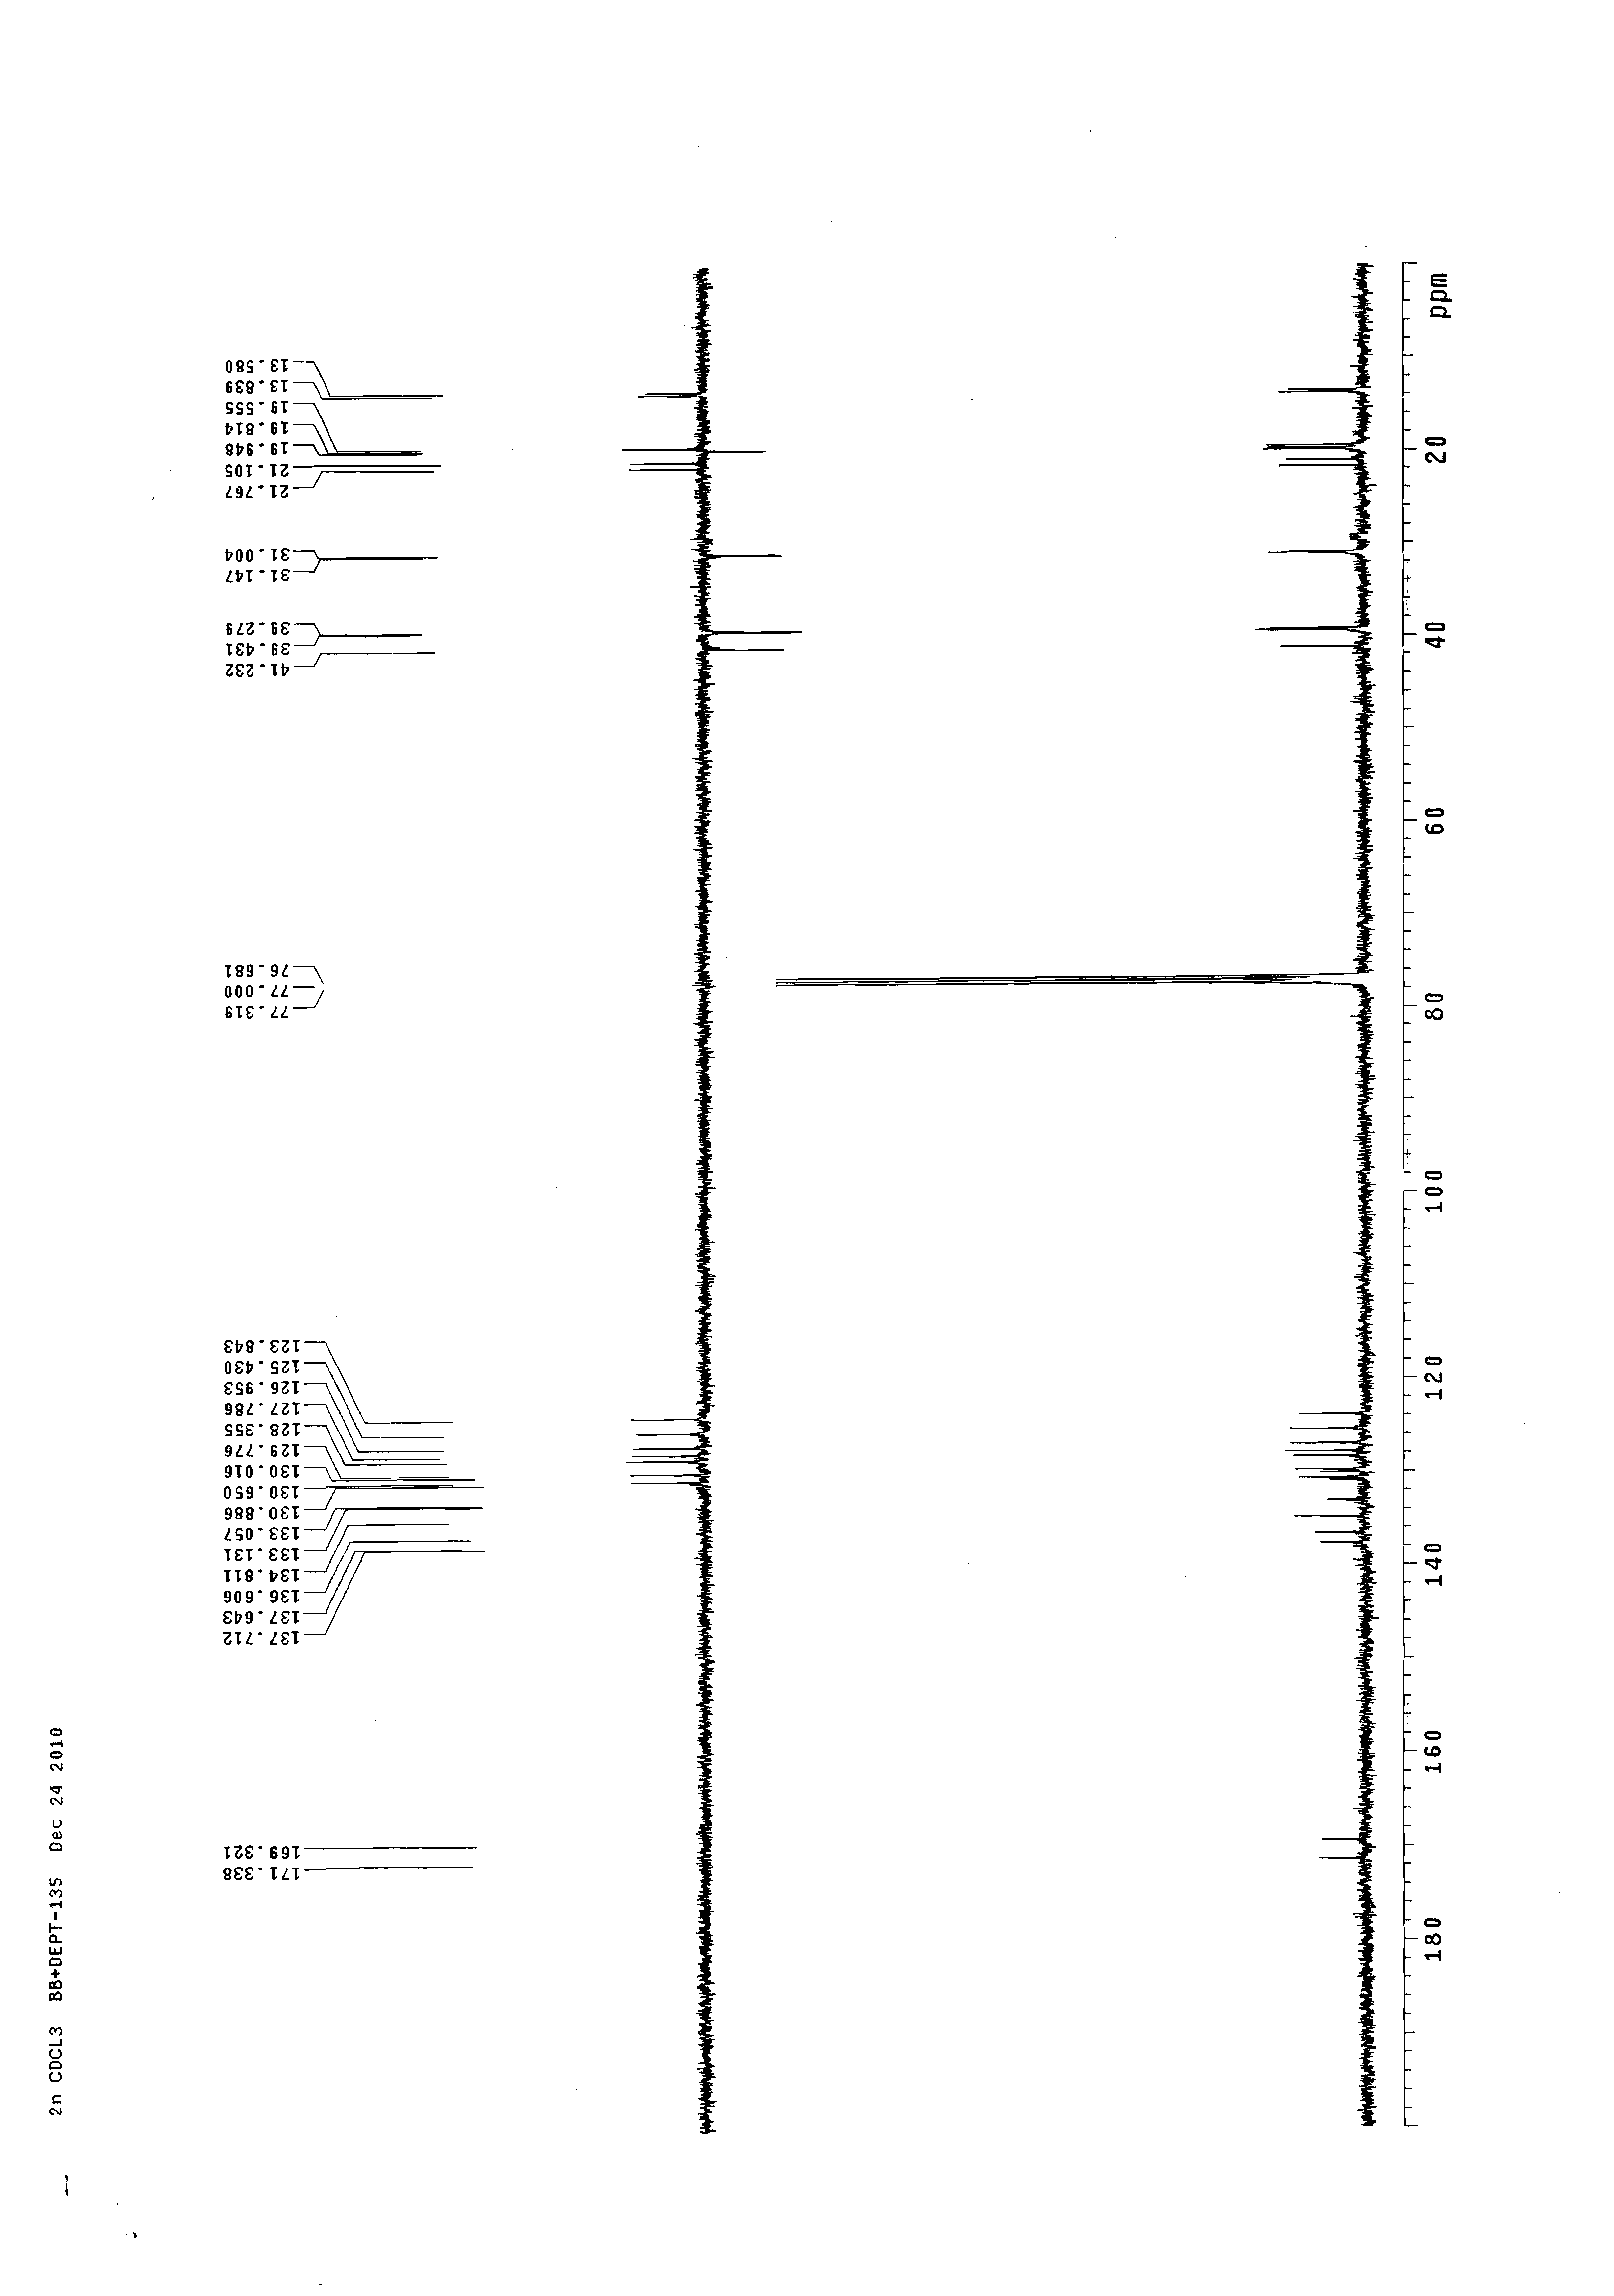
**

***N*-butyl-2-(2-(2-(butylamino)-2-oxoethyl)-5-chlorophenyl)-6-chloro-4-methyl-1-naphthamide (2o)**


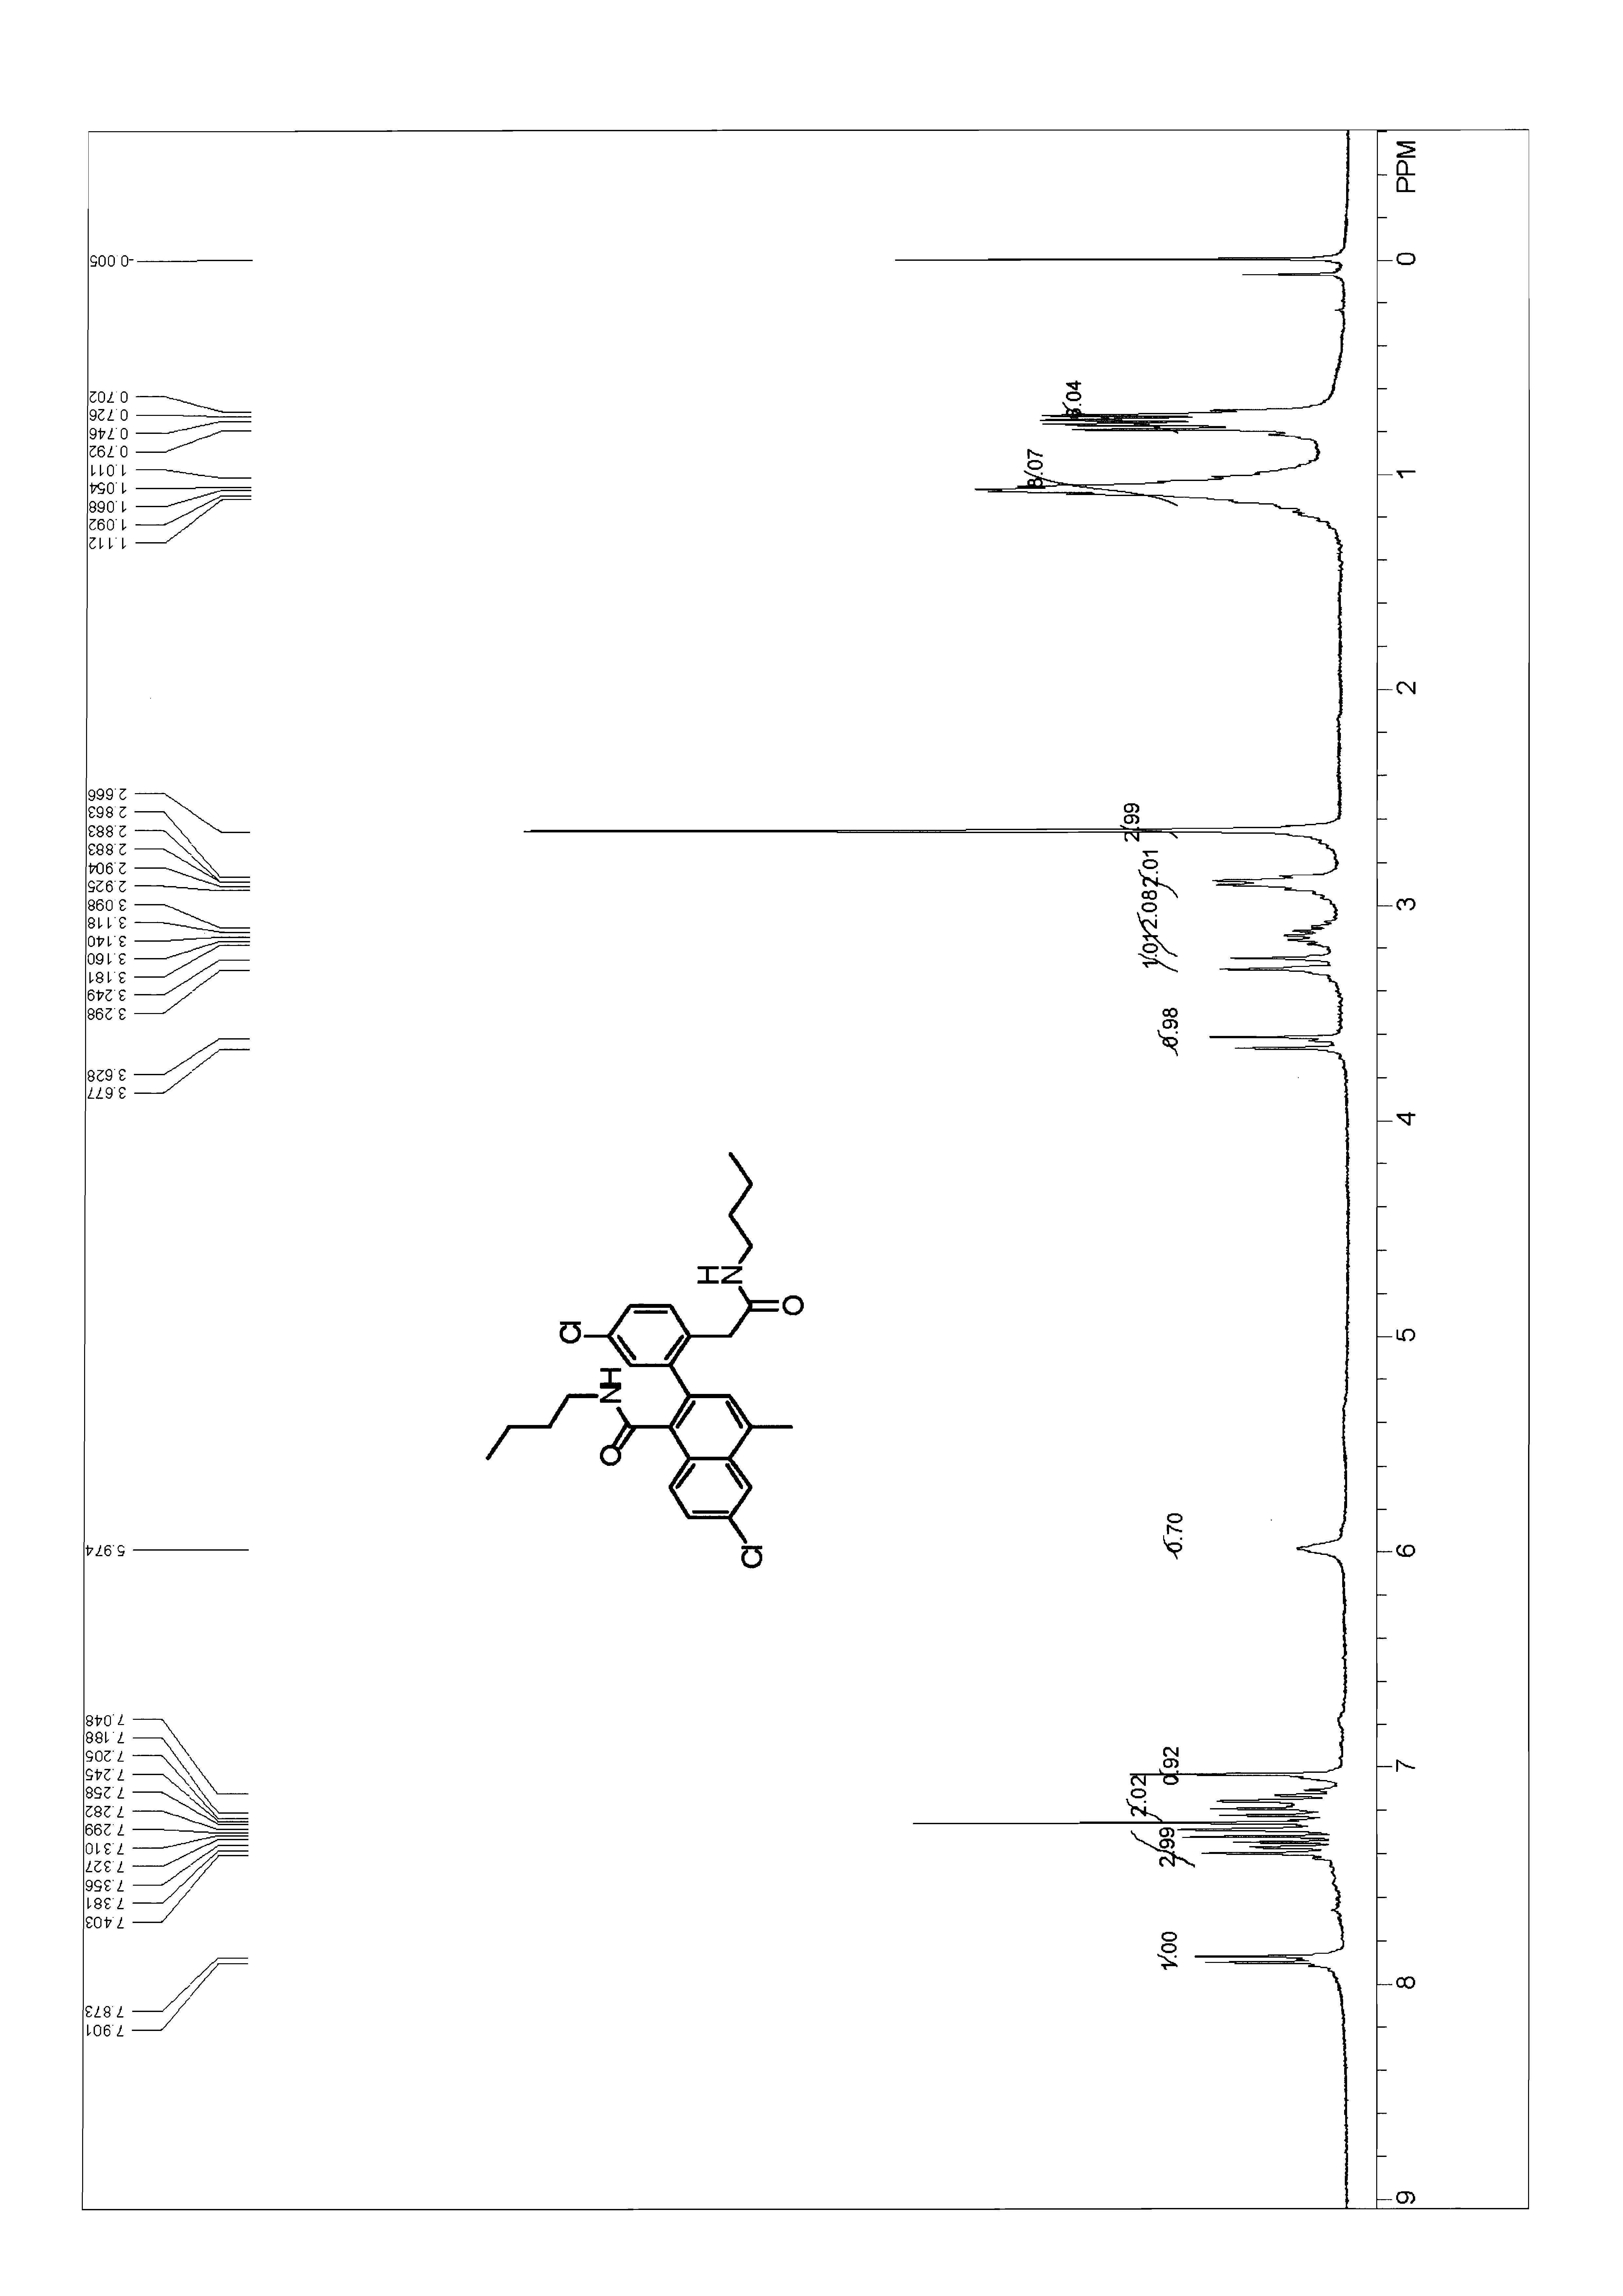


**
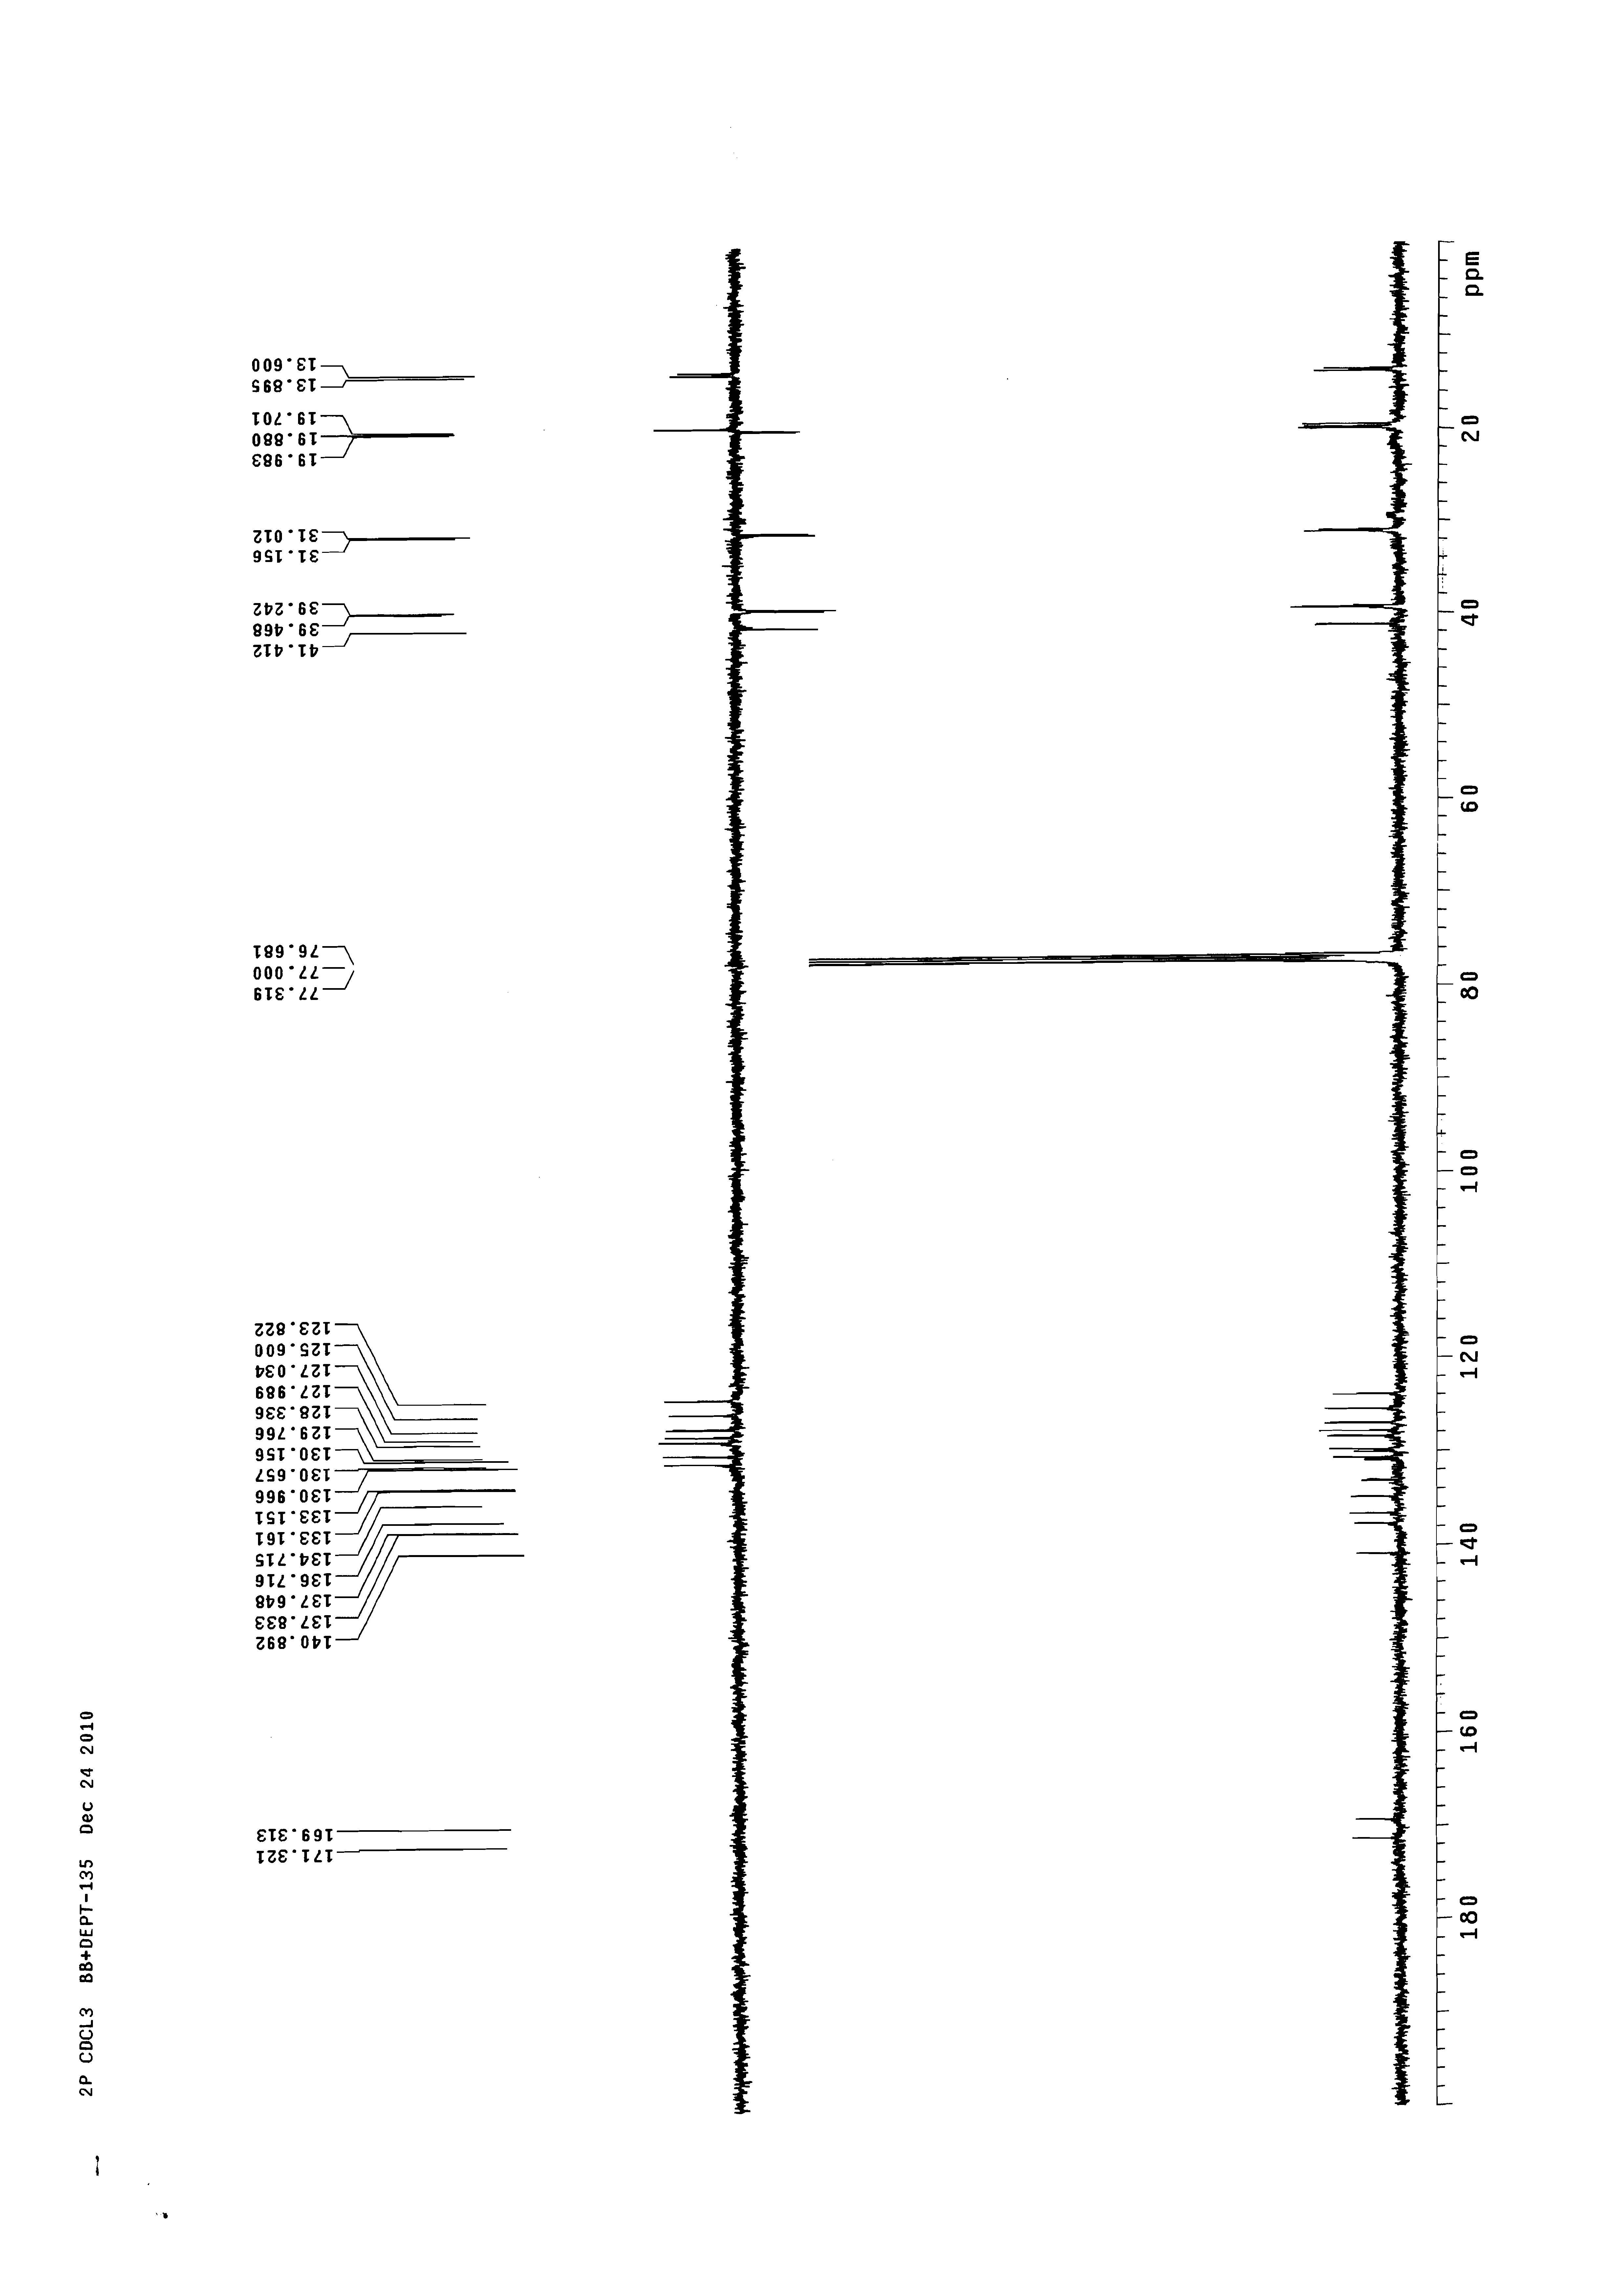
**

**X-ray crystal structure of compound 2a**


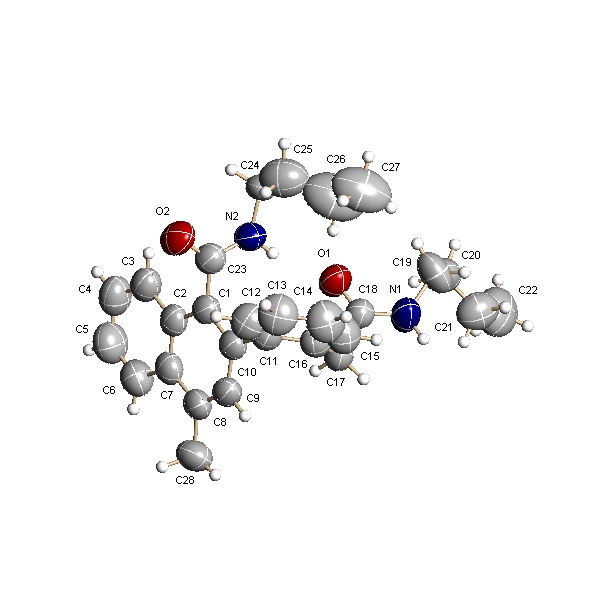


| Bond precision: | C-C = 0.0049 A | Wavelength=0.71073 |
| --- | --- | --- |

| Cell: | a=33.679(3) | b=33.679(3) | c=13.0553(14) |
| --- | --- | --- | --- |
|  | alpha=90 | beta=90 | gamma=120 |
| Temperature: | 293 K |  |  |

|  | Calculated | Reported |
| --- | --- | --- |
| Volume | 12824(2) | 12824.5(19) |
| Space group | R -3 | R-3 |
| Hall group | -R 3 | ? |
| Moiety formula | 6(C28 H34 N2 O2), 6(C H4 O), C Cl2 | ? |
| Sum formula | C175 H228 Cl2 N12 O18 | C29.17 H38.33 CL0.33 N2 O3 |
| Mr | 2858.59 | 476.77 |
| Dx,g cm-3 | 1.110 | 1.111 |
| Z | 3 | 18 |
| Mu (mm-1) | 0.101 | 0.101 |
| F000 | 4620.0 | 4626.0 |
| F000' | 4622.74 |  |
| h,k,lmax | 40,40,15 | 40,40,15 |
| Nref | 5306 | 5309 |
| Tmin,Tmax | 0.964,0.982 | 0.798,1.000 |
| Tmin' | 0.964 |  |

| Correction method= EMPIRICAL |  |
| --- | --- |

| Data completeness= 1.001 | Theta(max)= 25.490 |
| --- | --- |

| R(reflections)= 0.0637( 2315) | wR2(reflections)= 0.2101( 5309) |
| --- | --- |

| S = 0.837 | Npar= 363 |
| --- | --- |

**Labeling Studies**

**1H -NMR spectra of deuterated 1a**

**
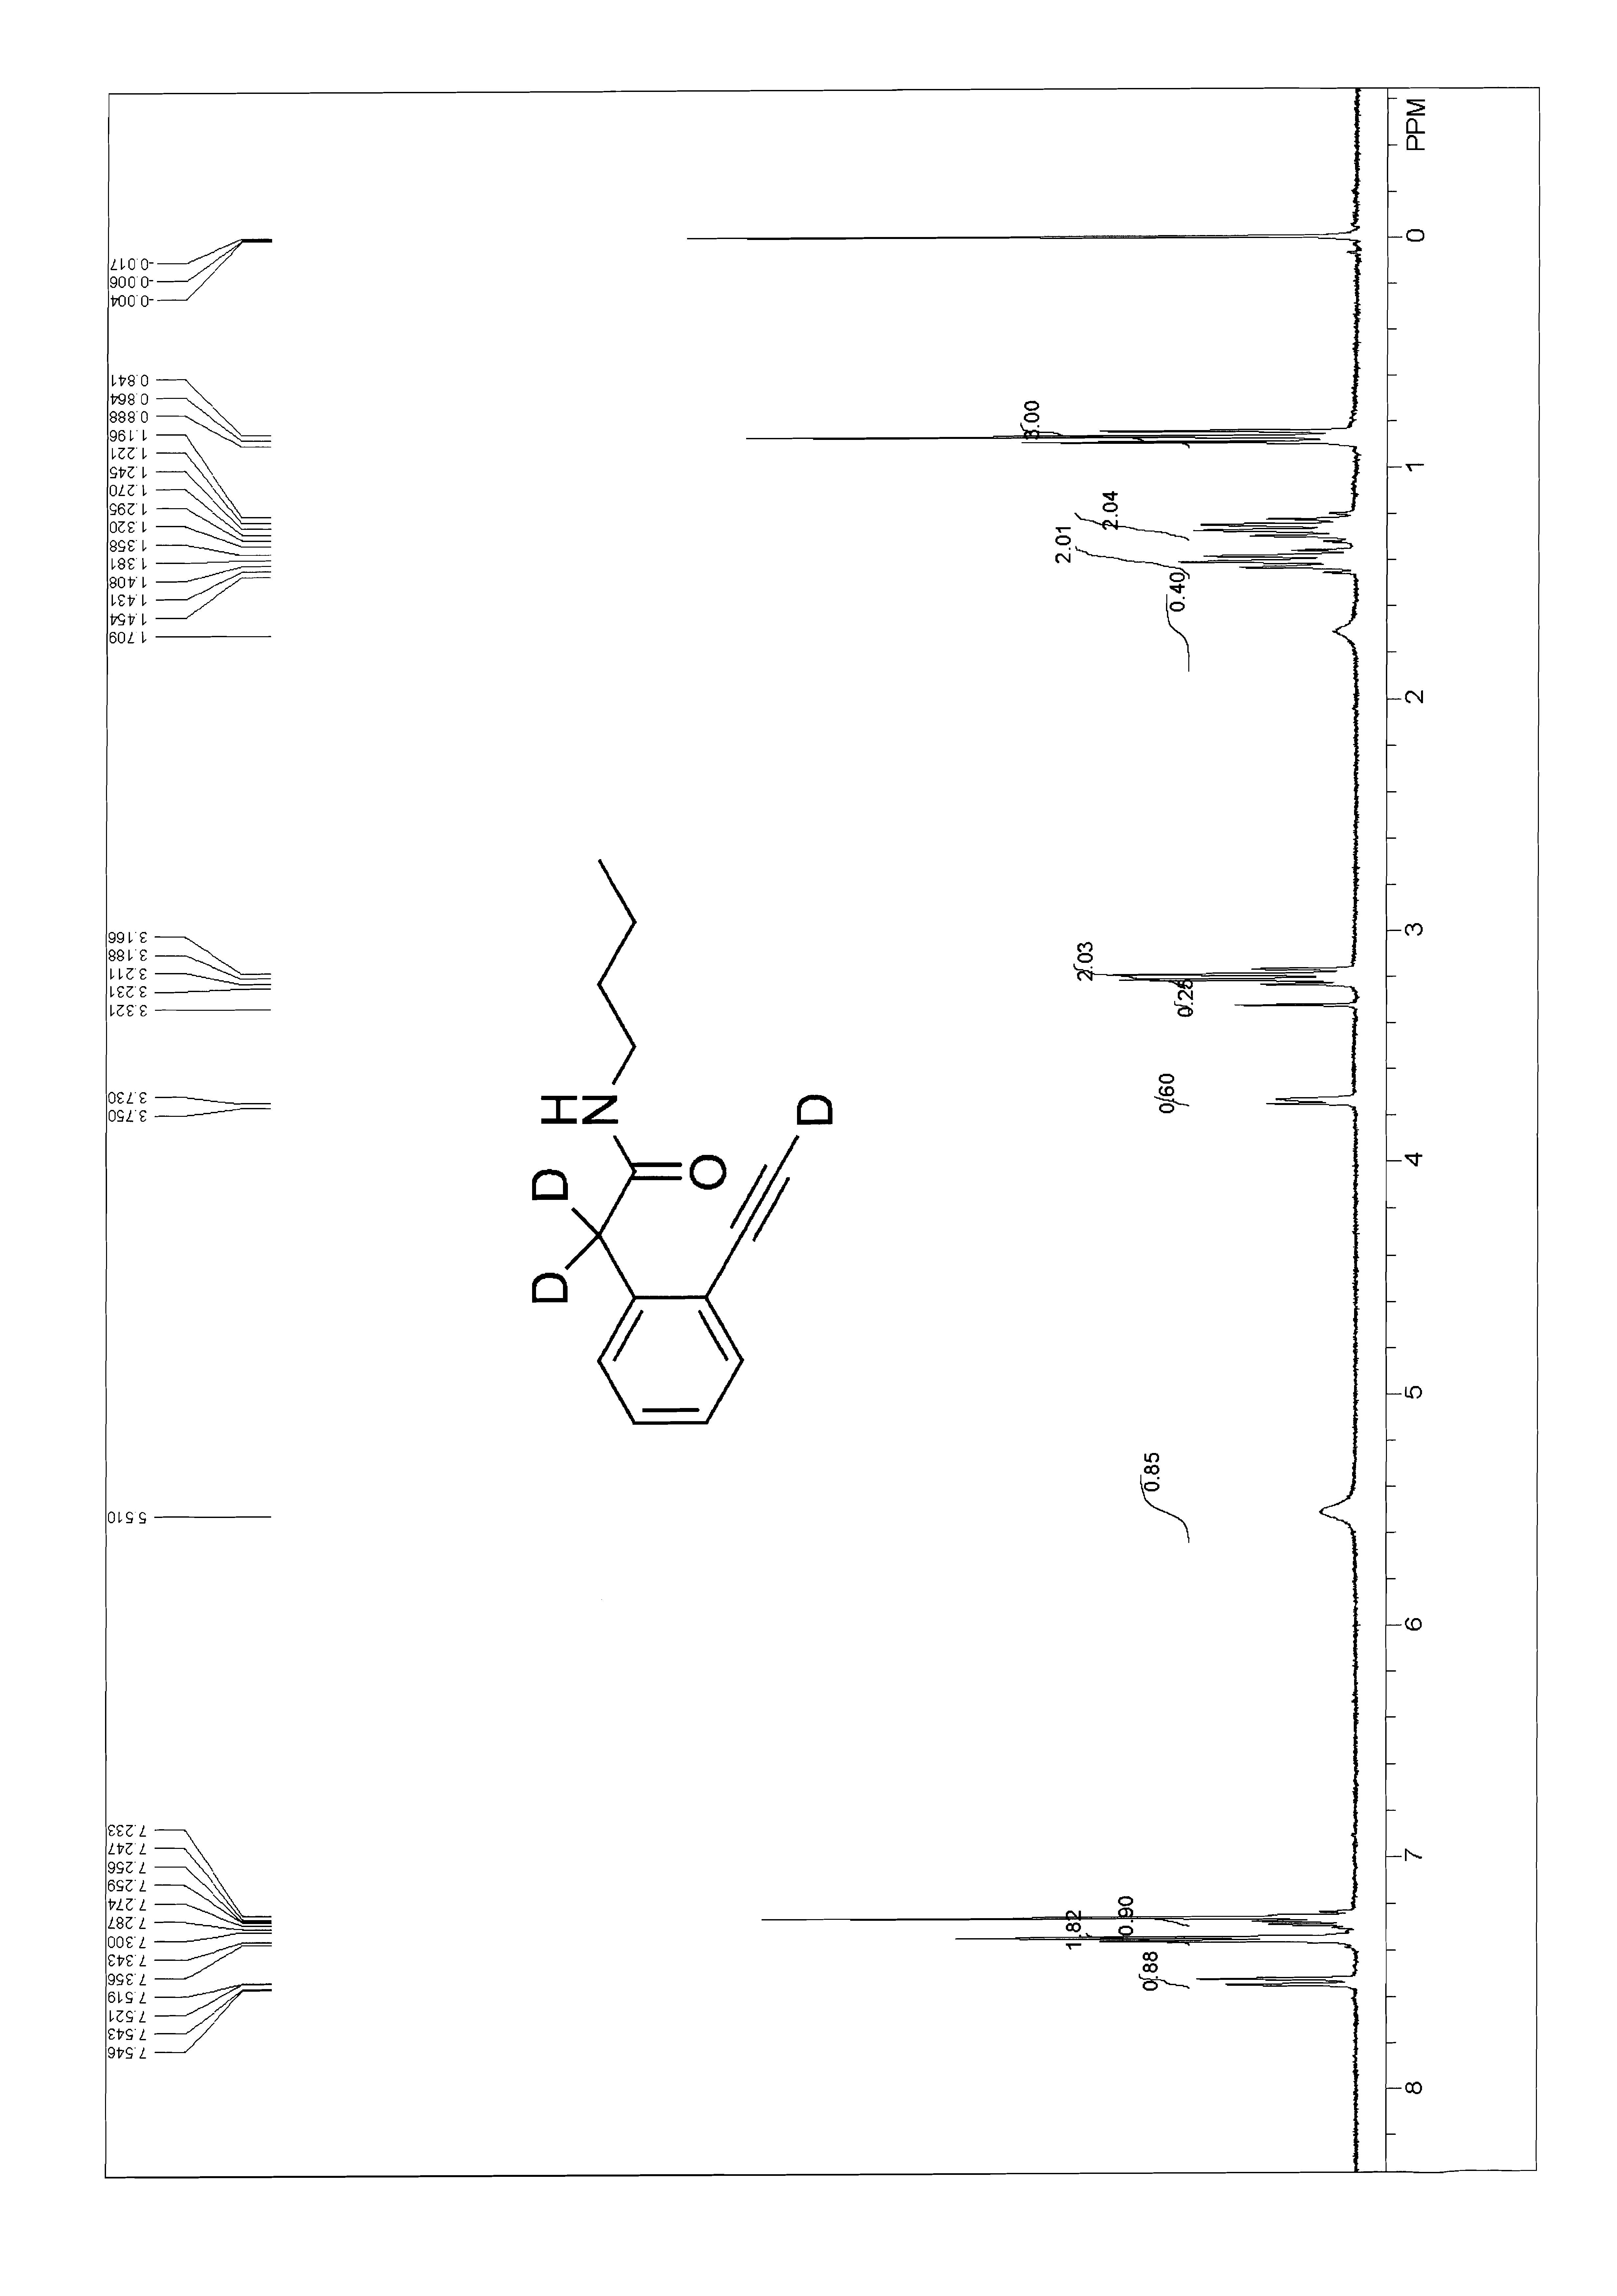
**

**1H-NMR spectra of the product of deuterated 1a in deuterated benzene**

**
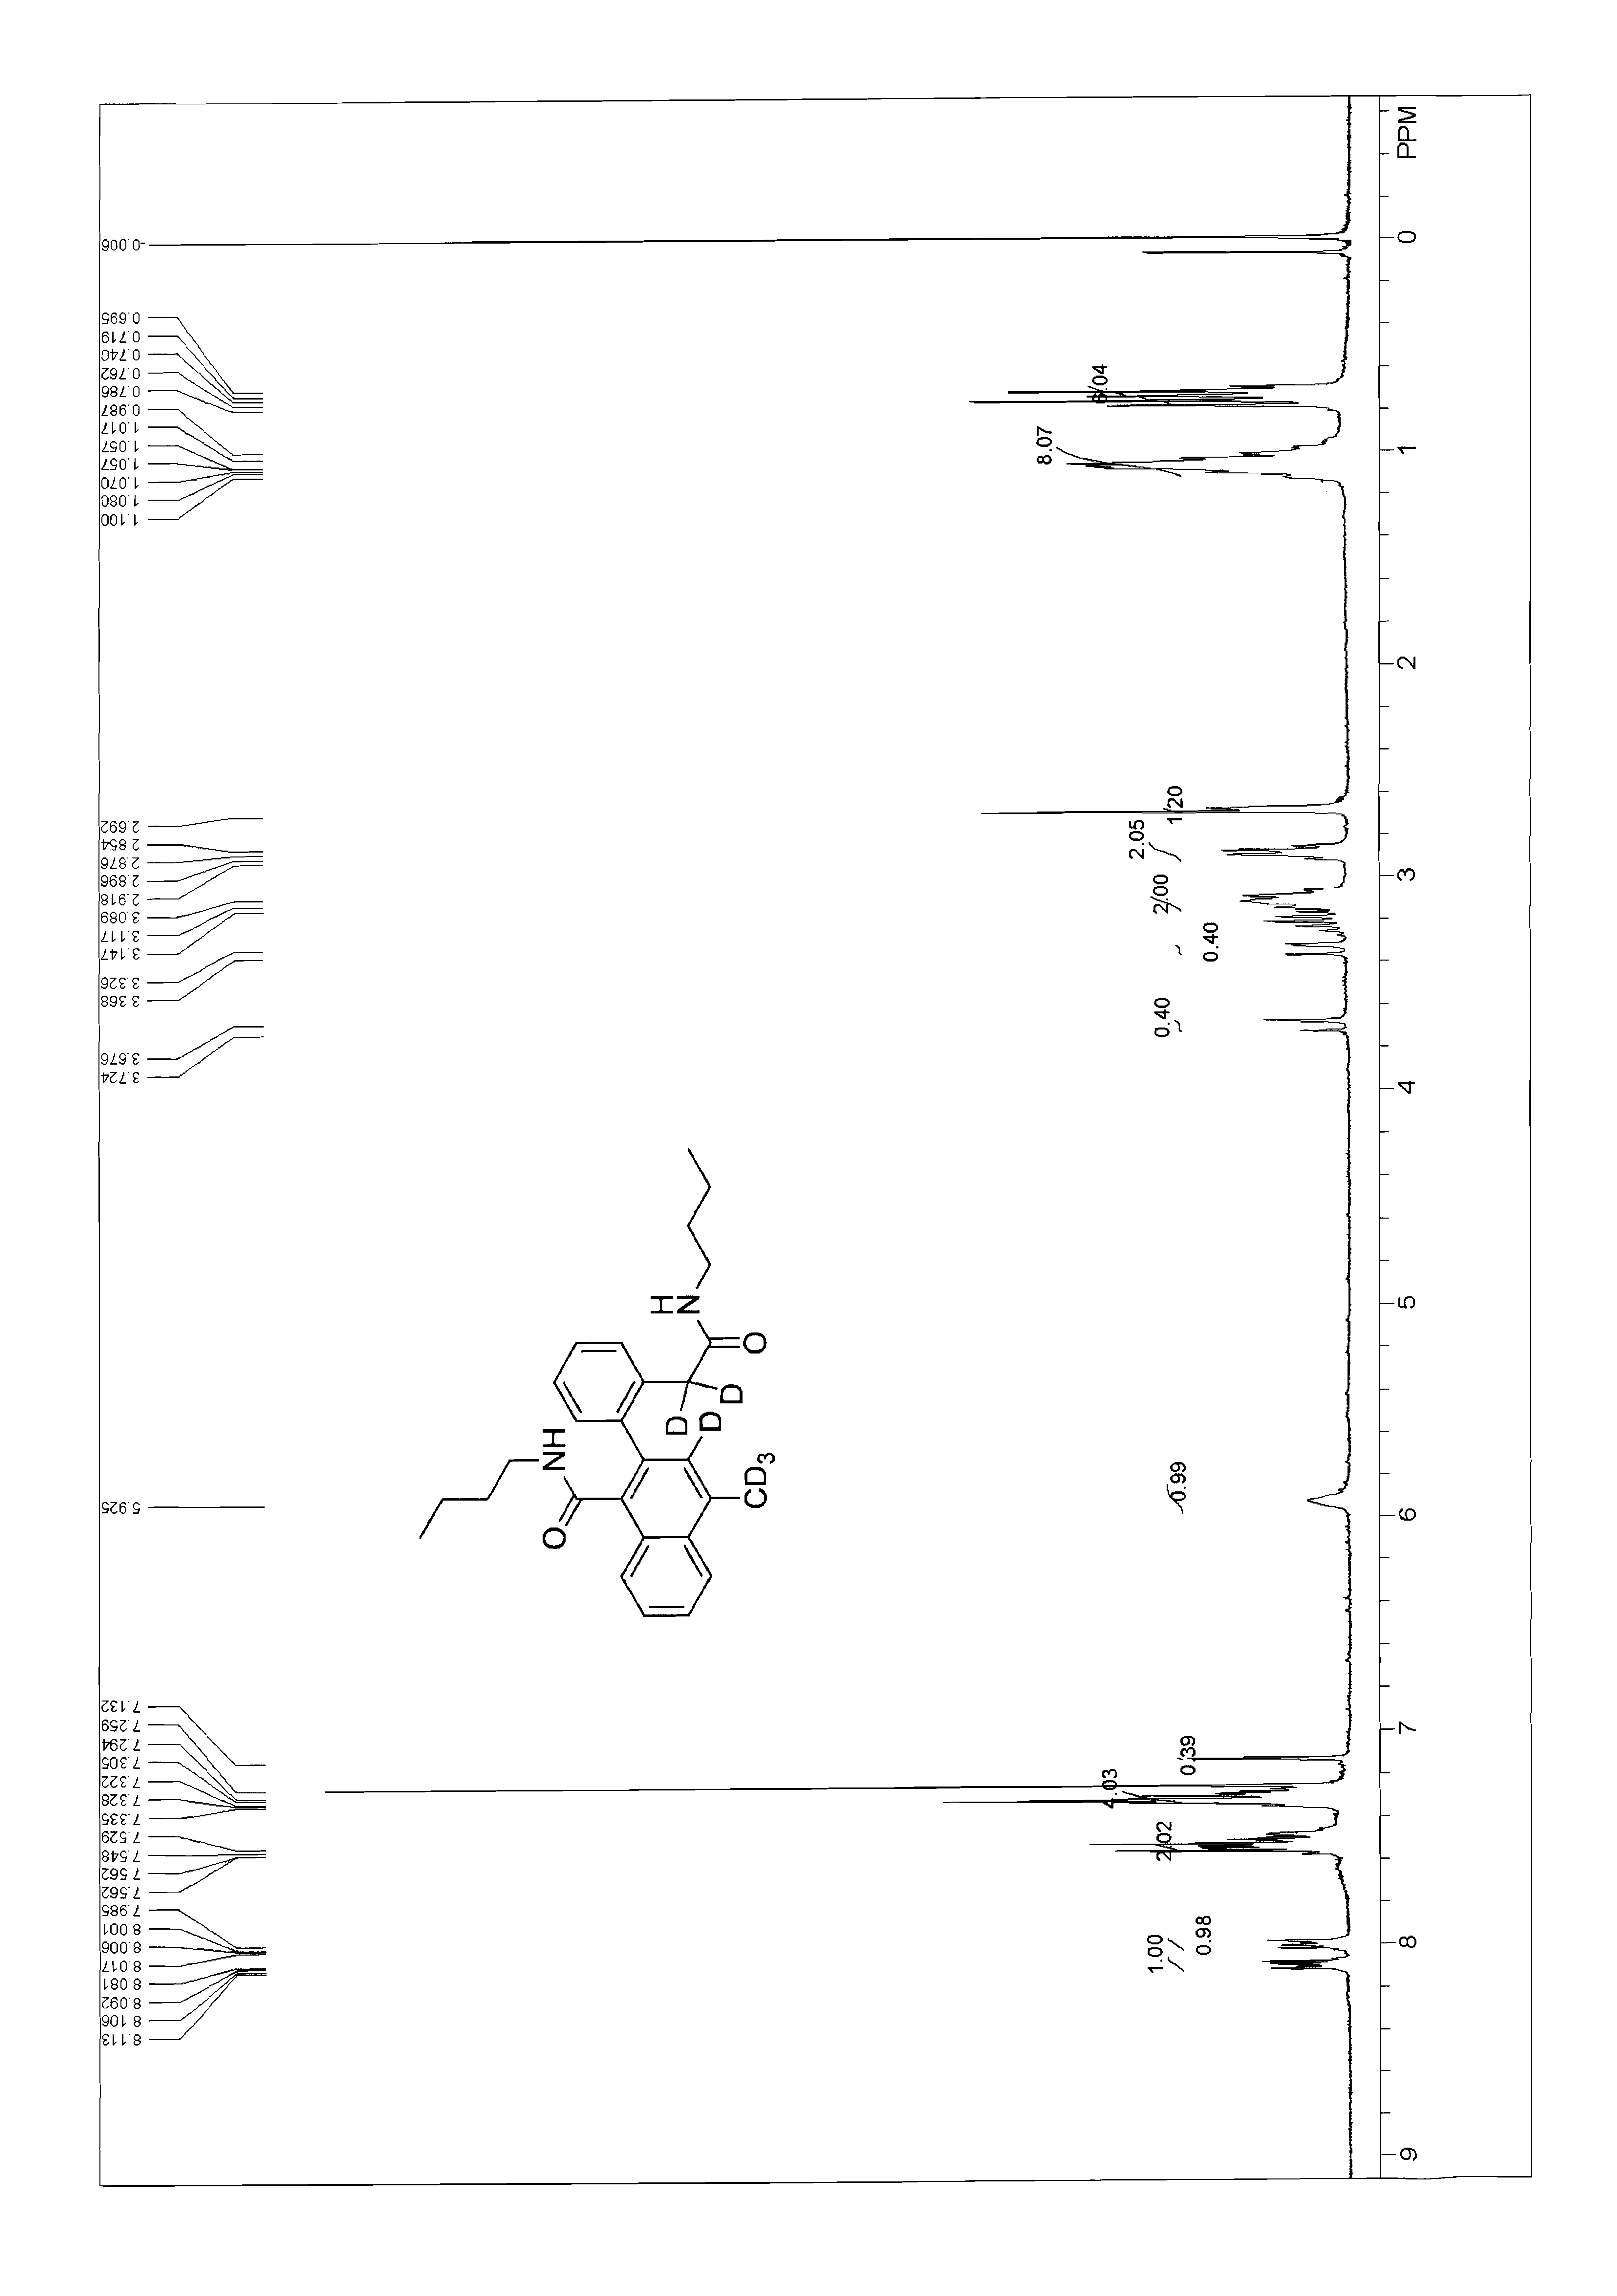
**

**1H -NMR spectra of the product of deuterated 1a in benzene**

**
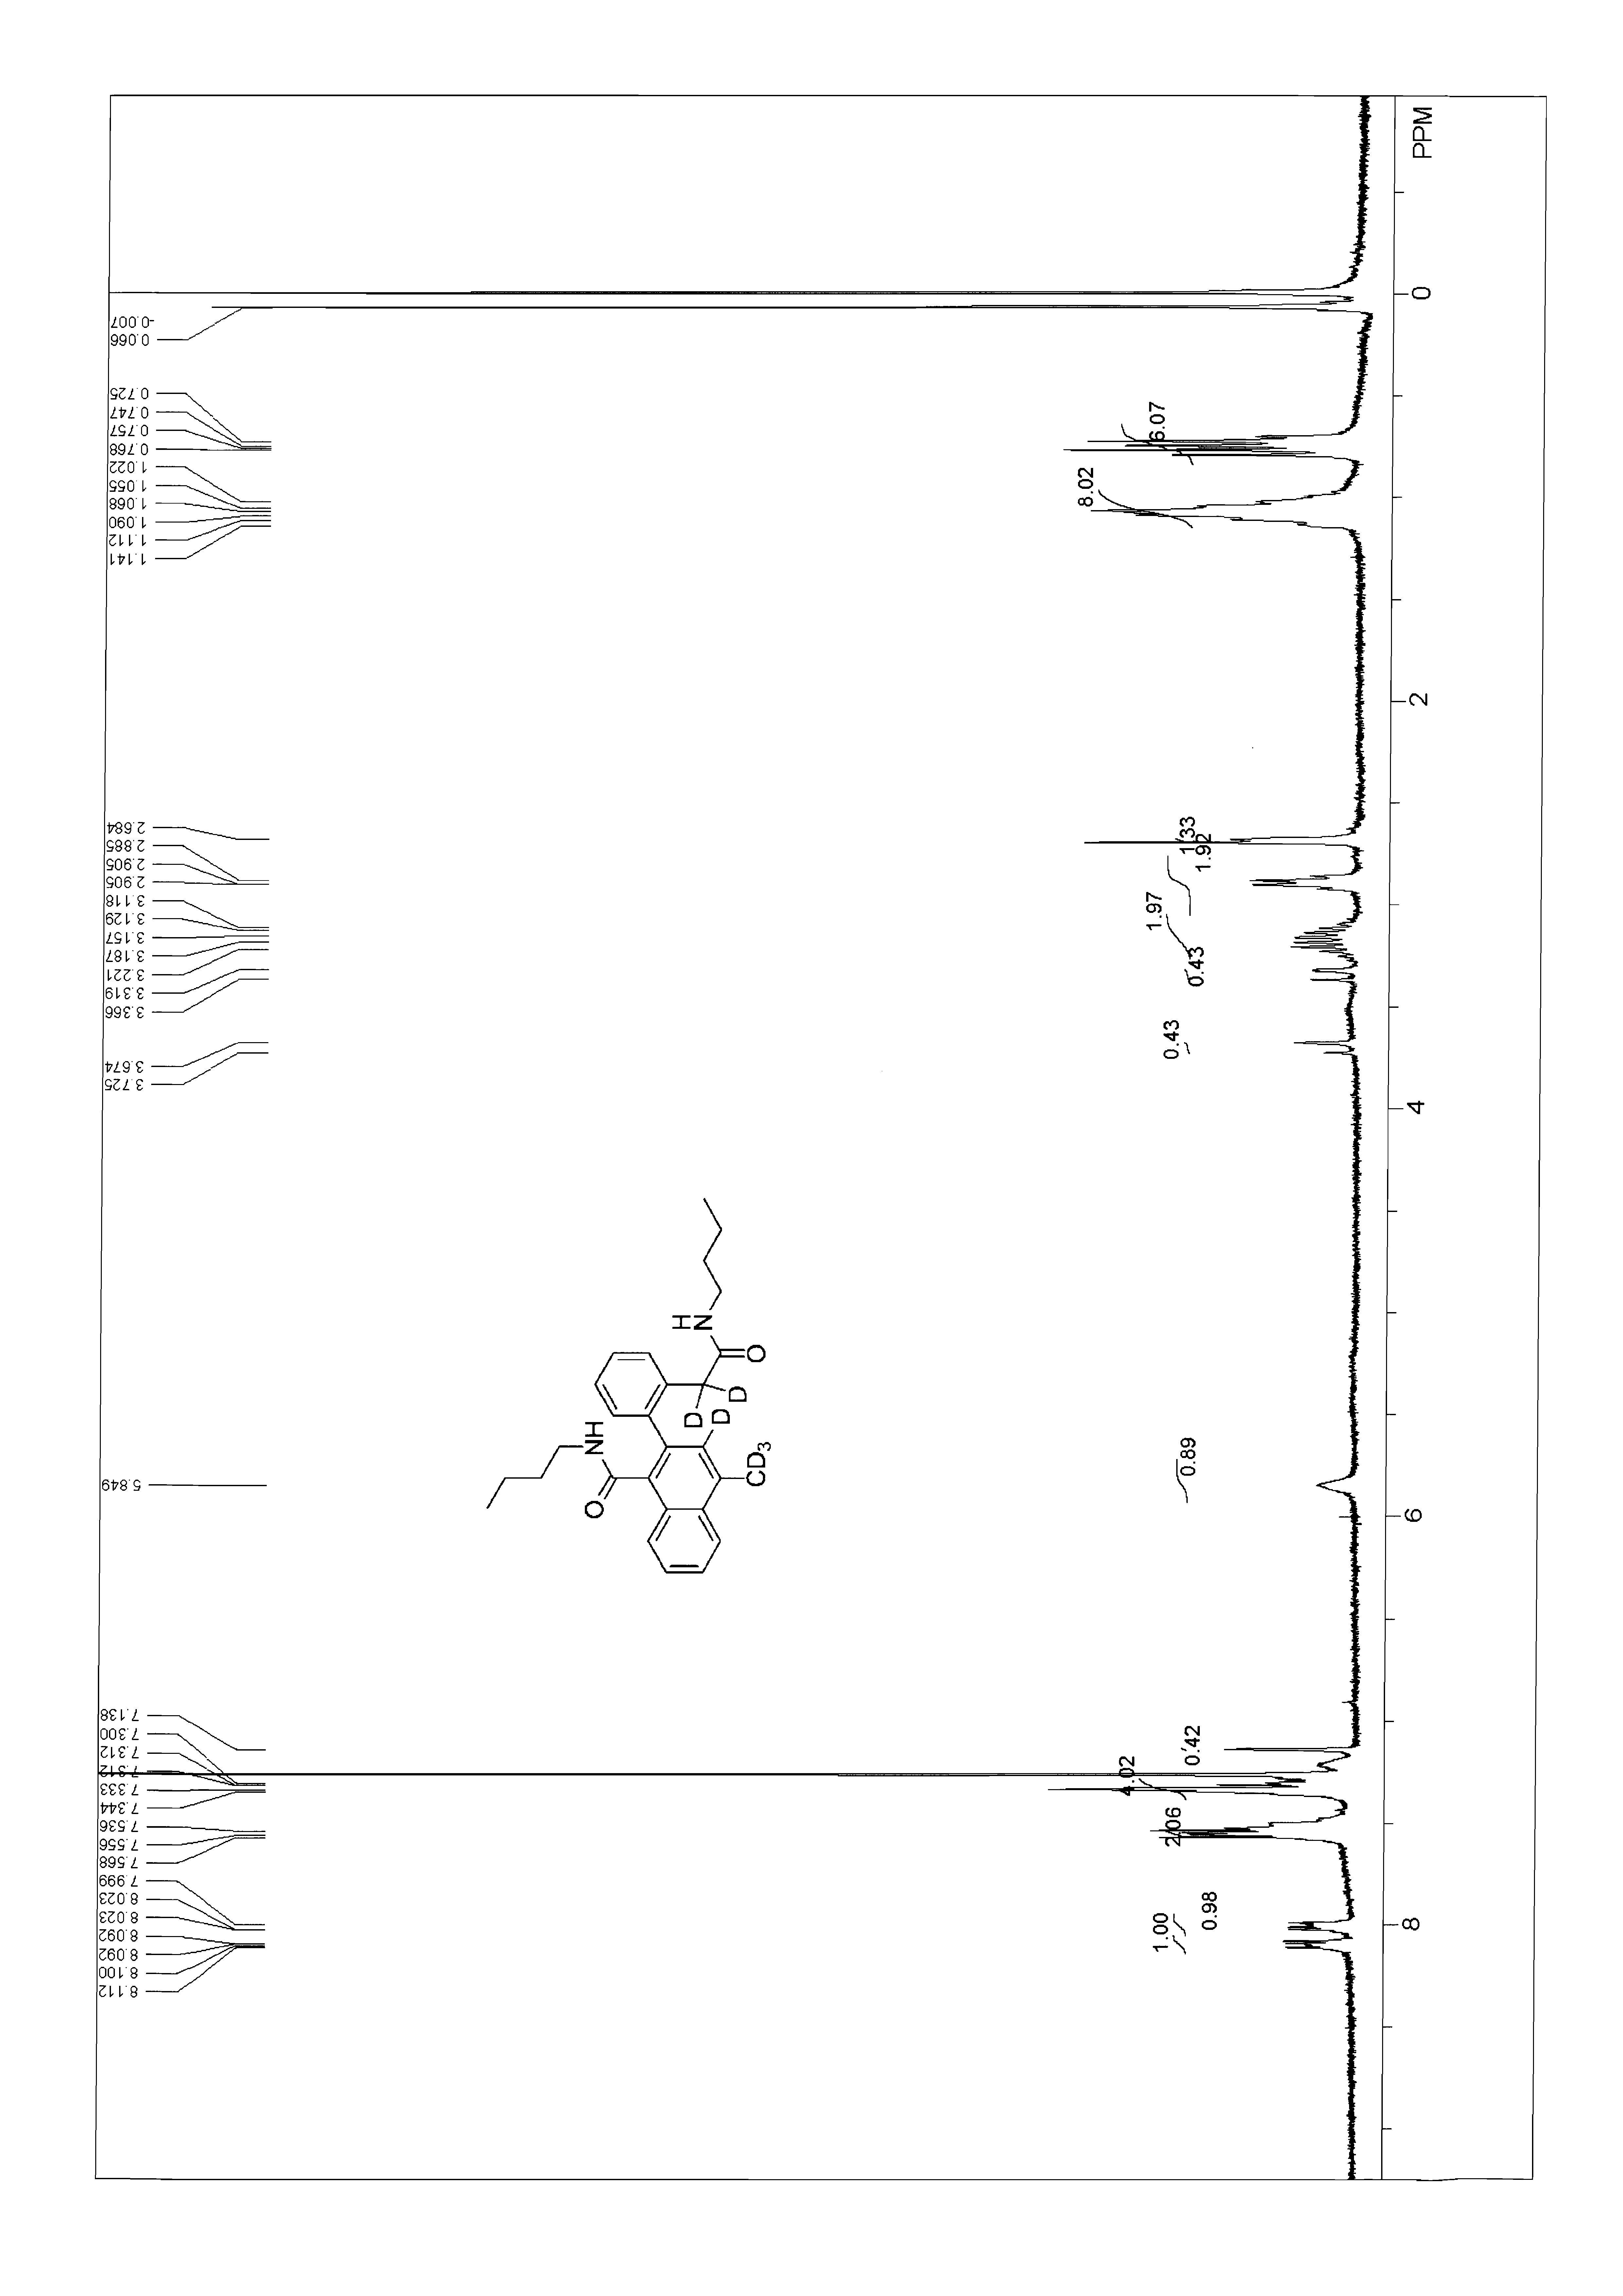
**

**1H -NMR spectra of the product of 1a in deuterated benzene**

**
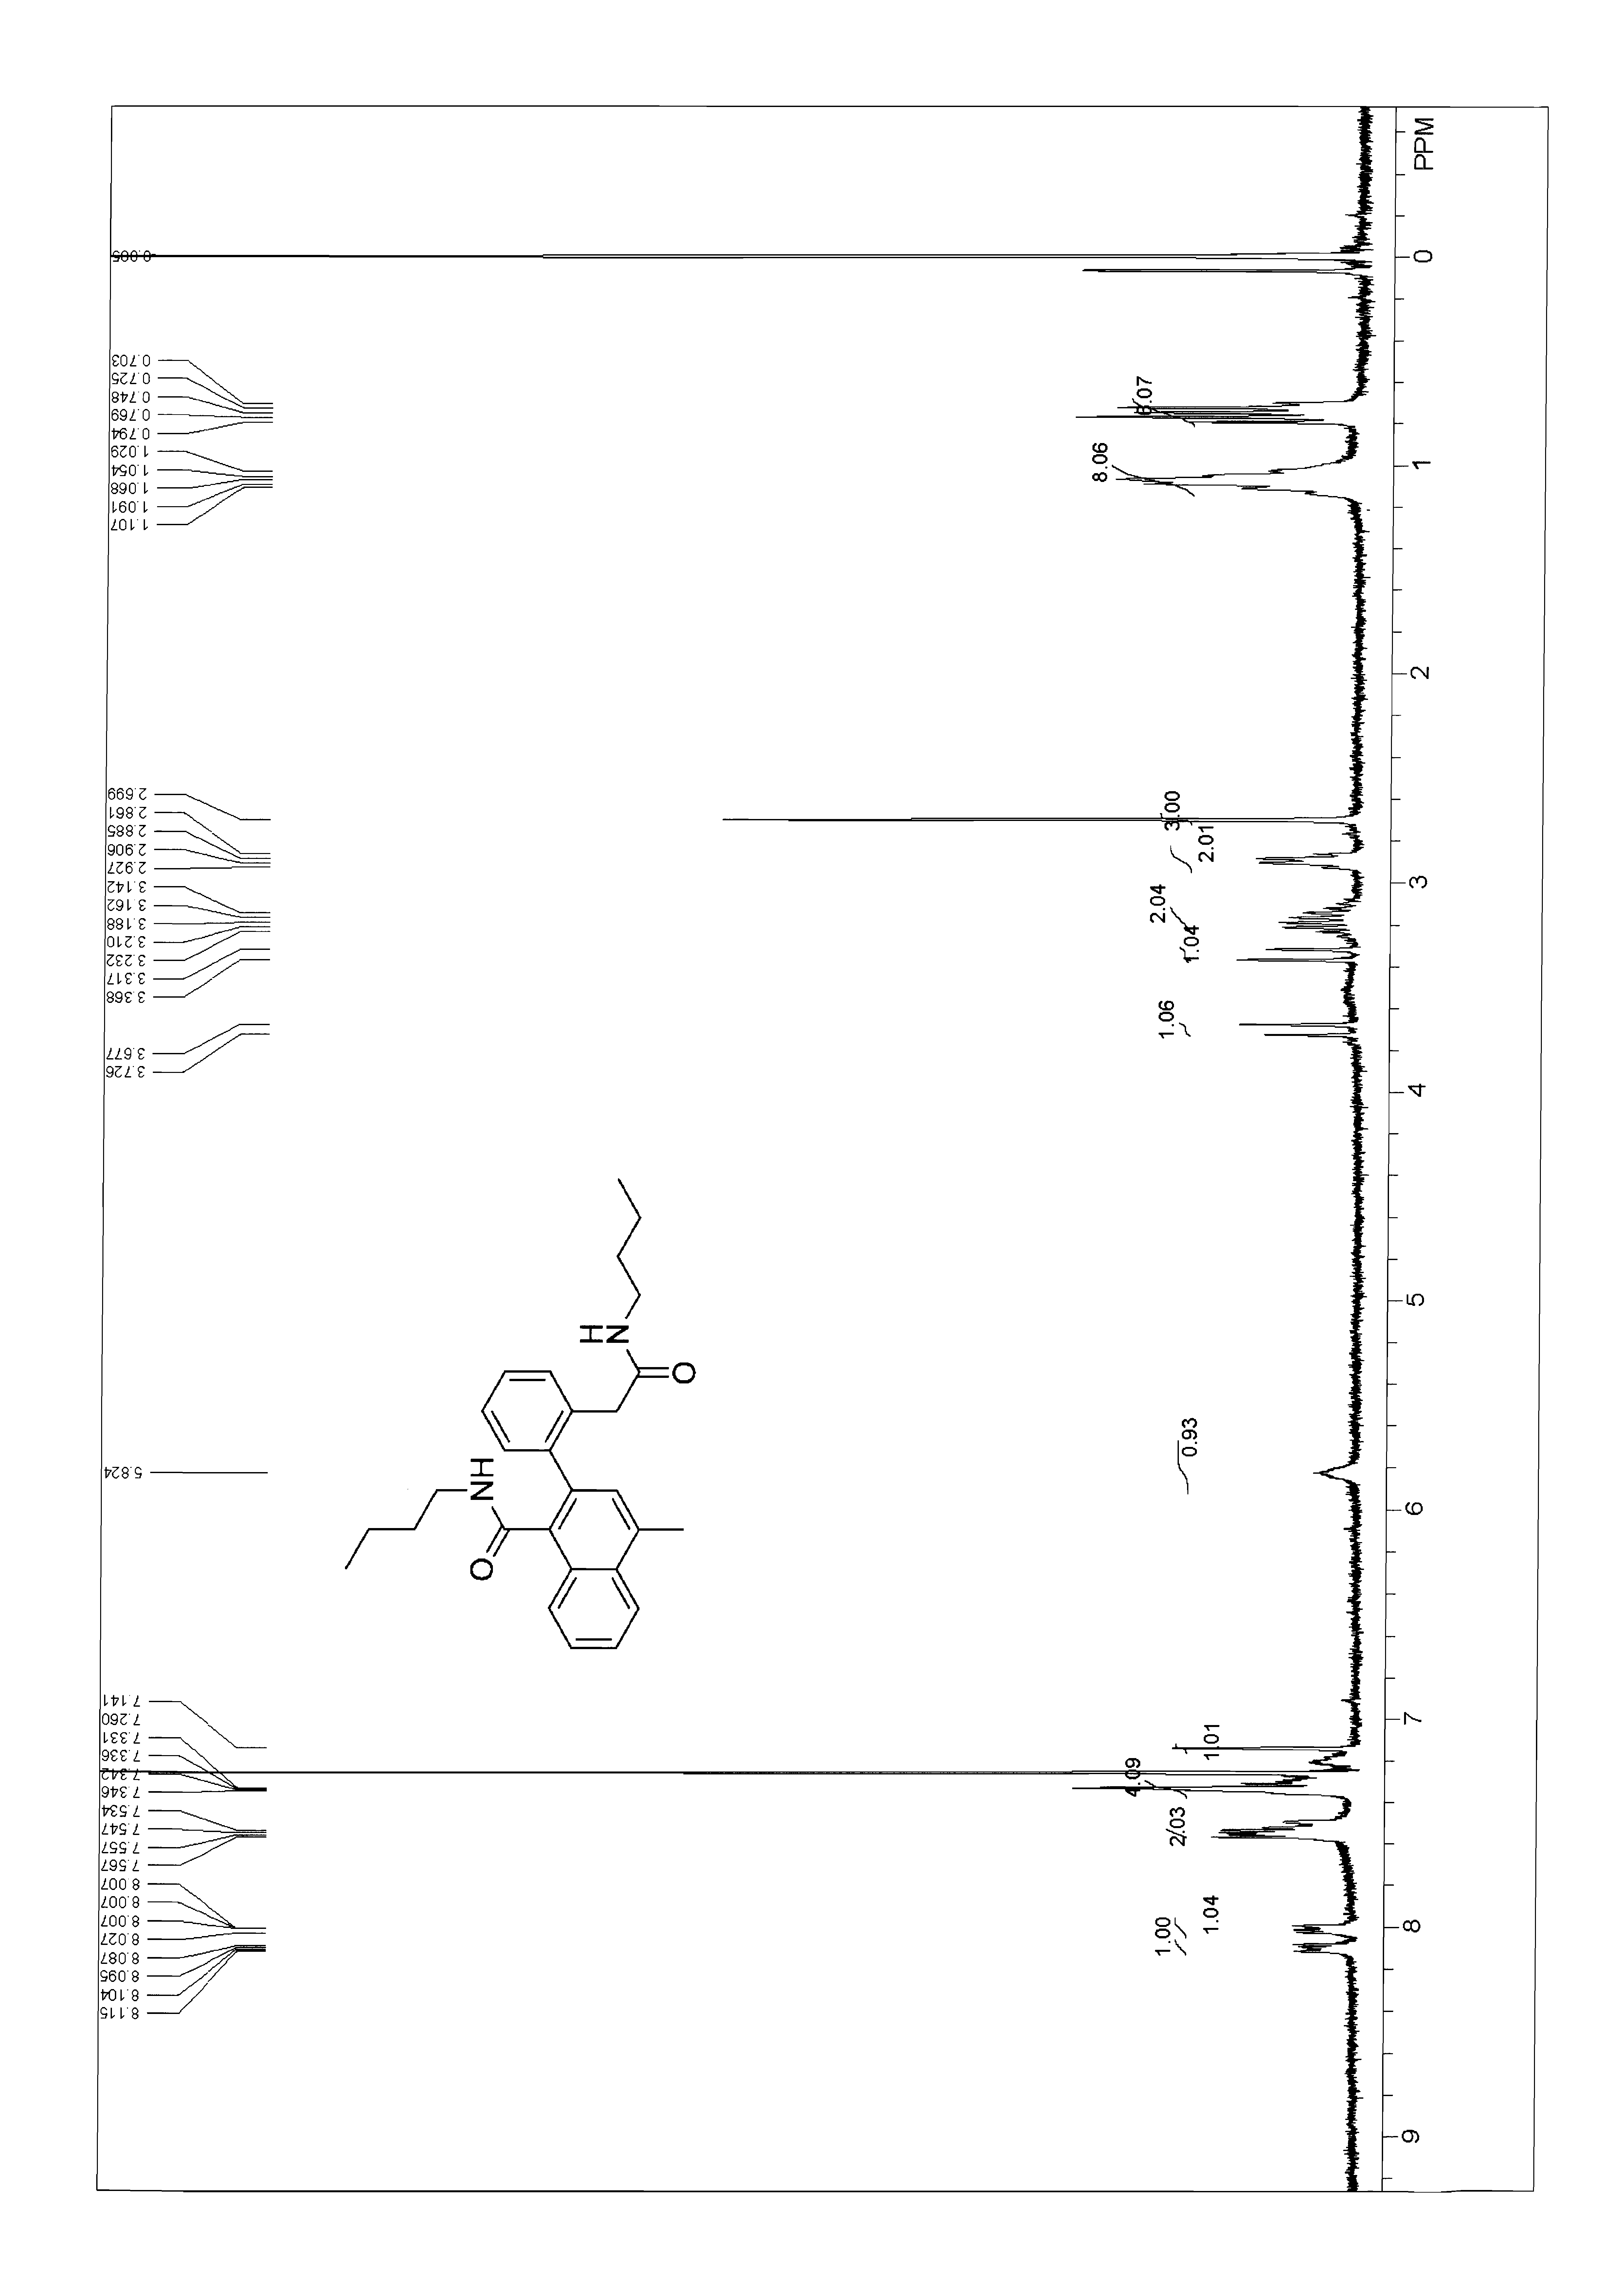
**

**1H-NMR spectra of *N*-butyl-4-methyl-2-phenyl-1-naphthamide (4)**

**
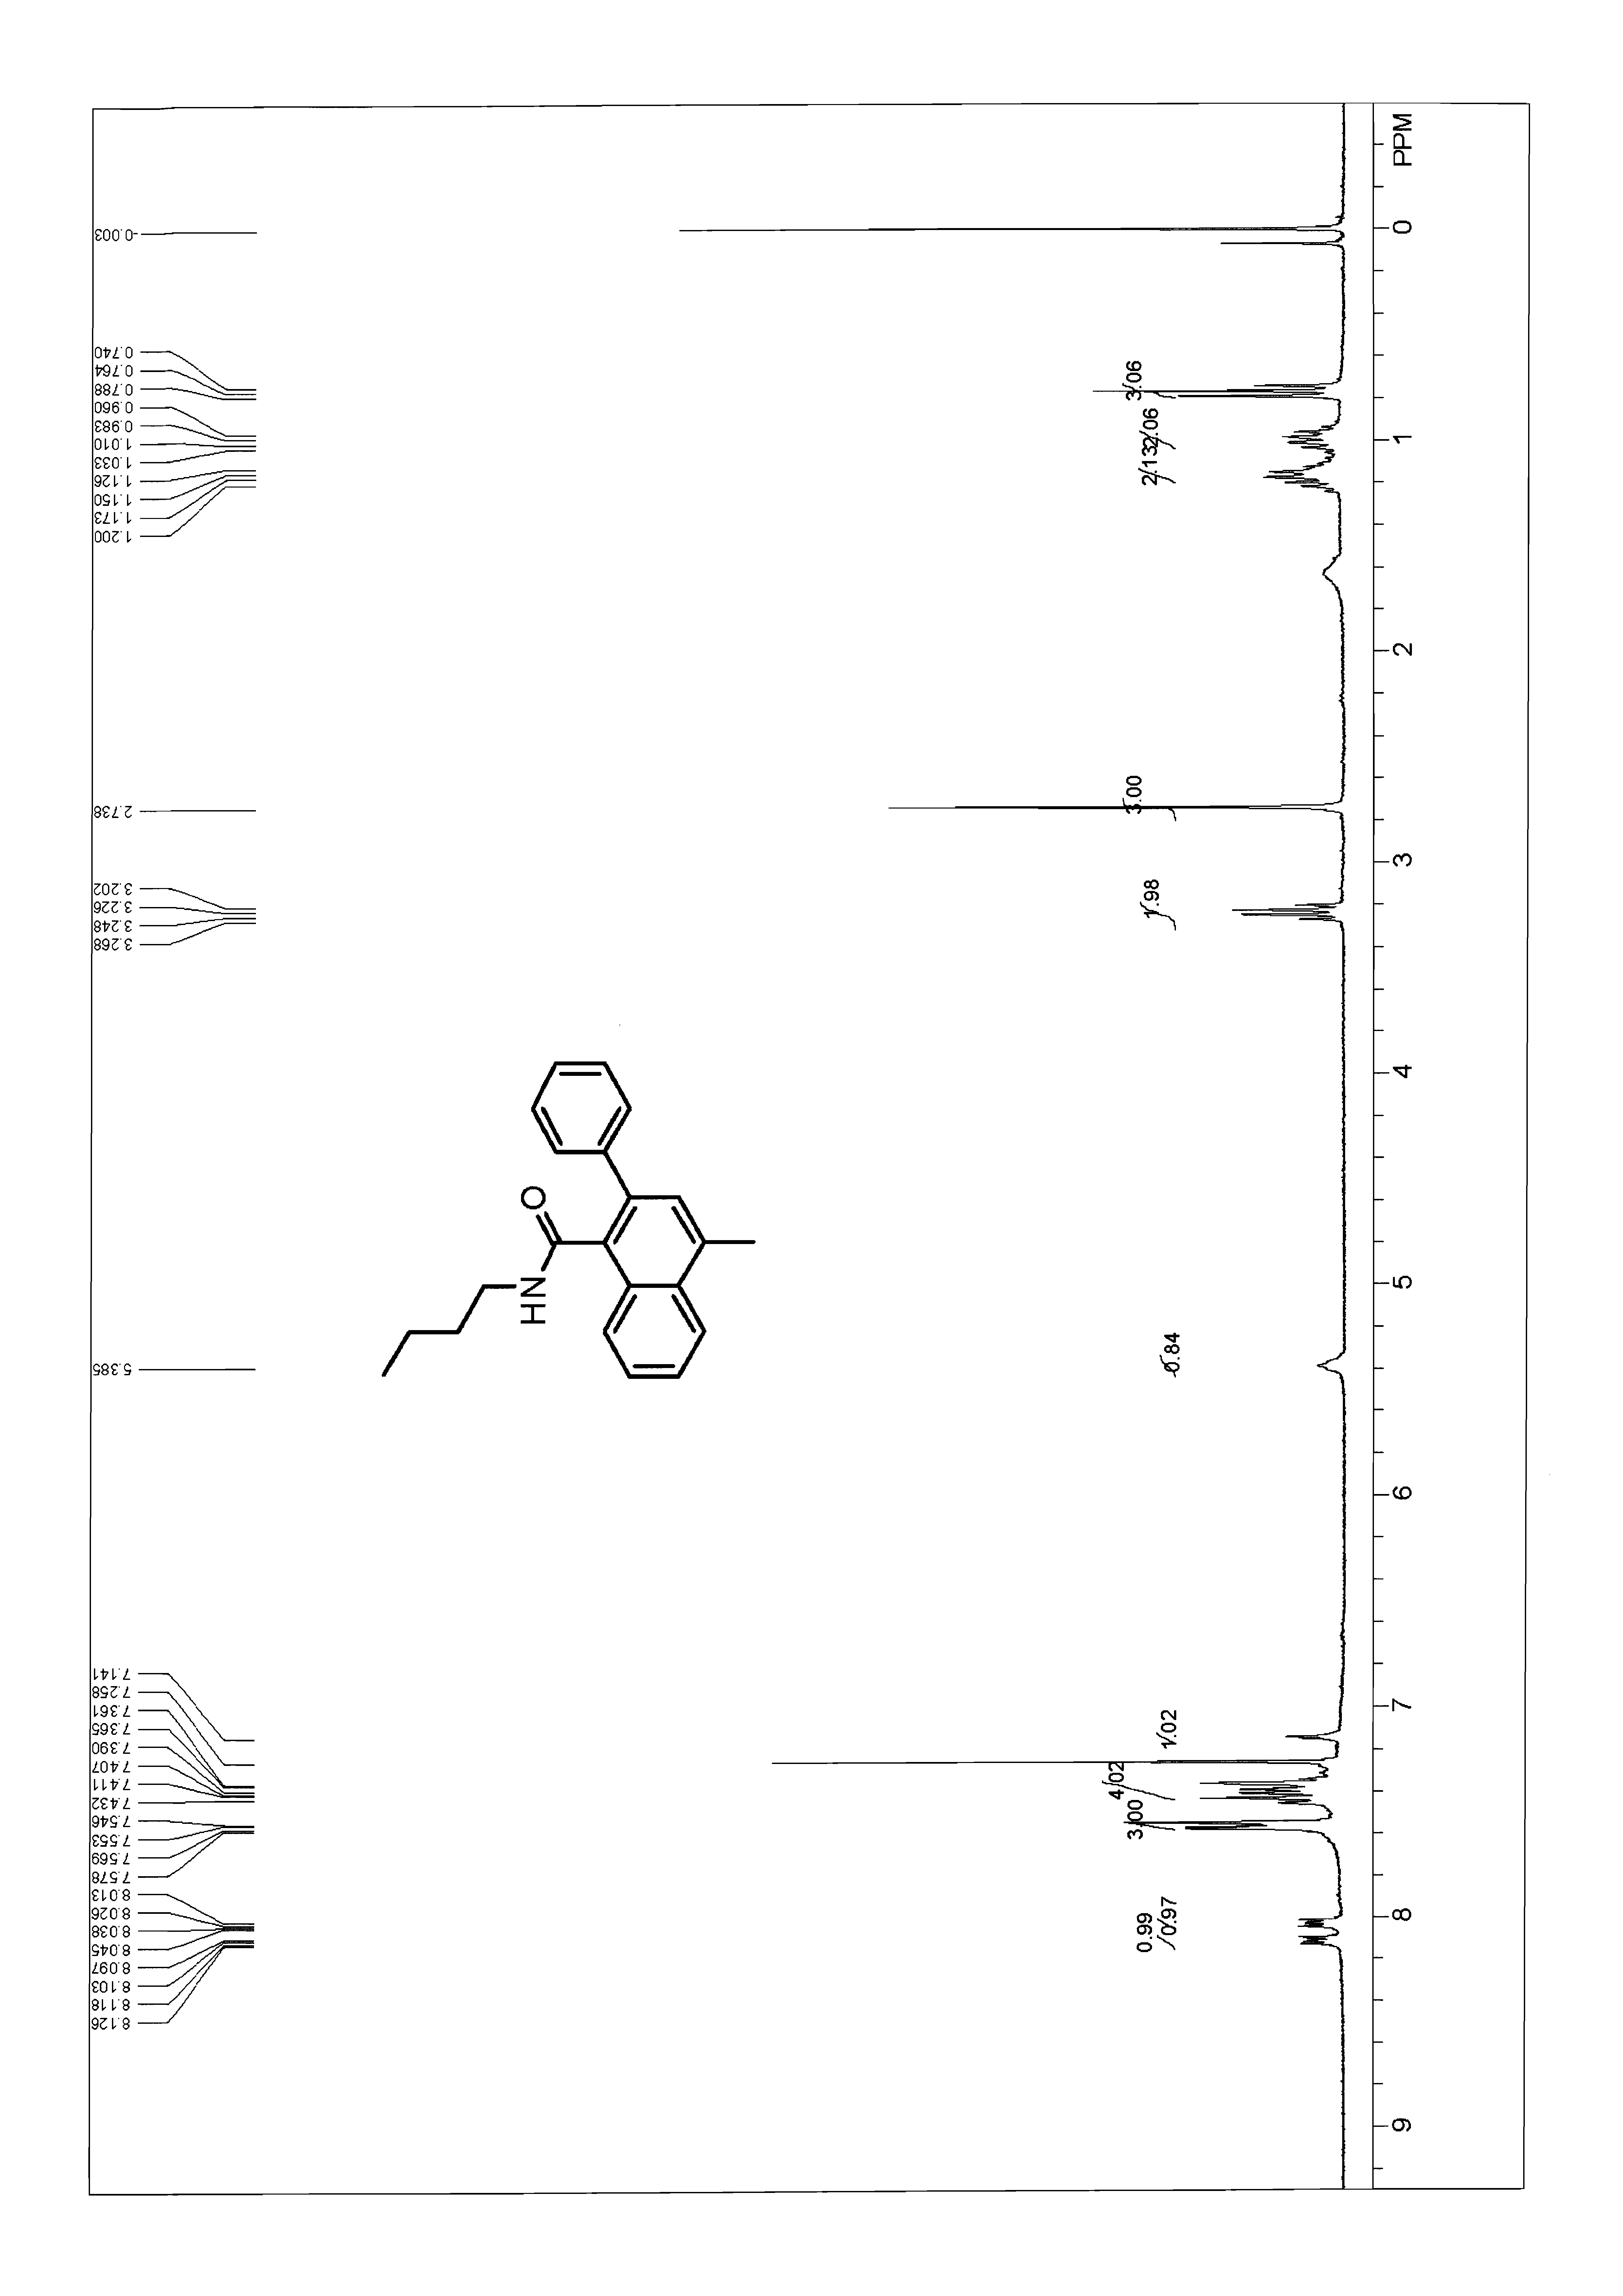
**

**13C-NMR spectra of *N*-butyl-4-methyl-2-phenyl-1-naphthamide (4)**

**
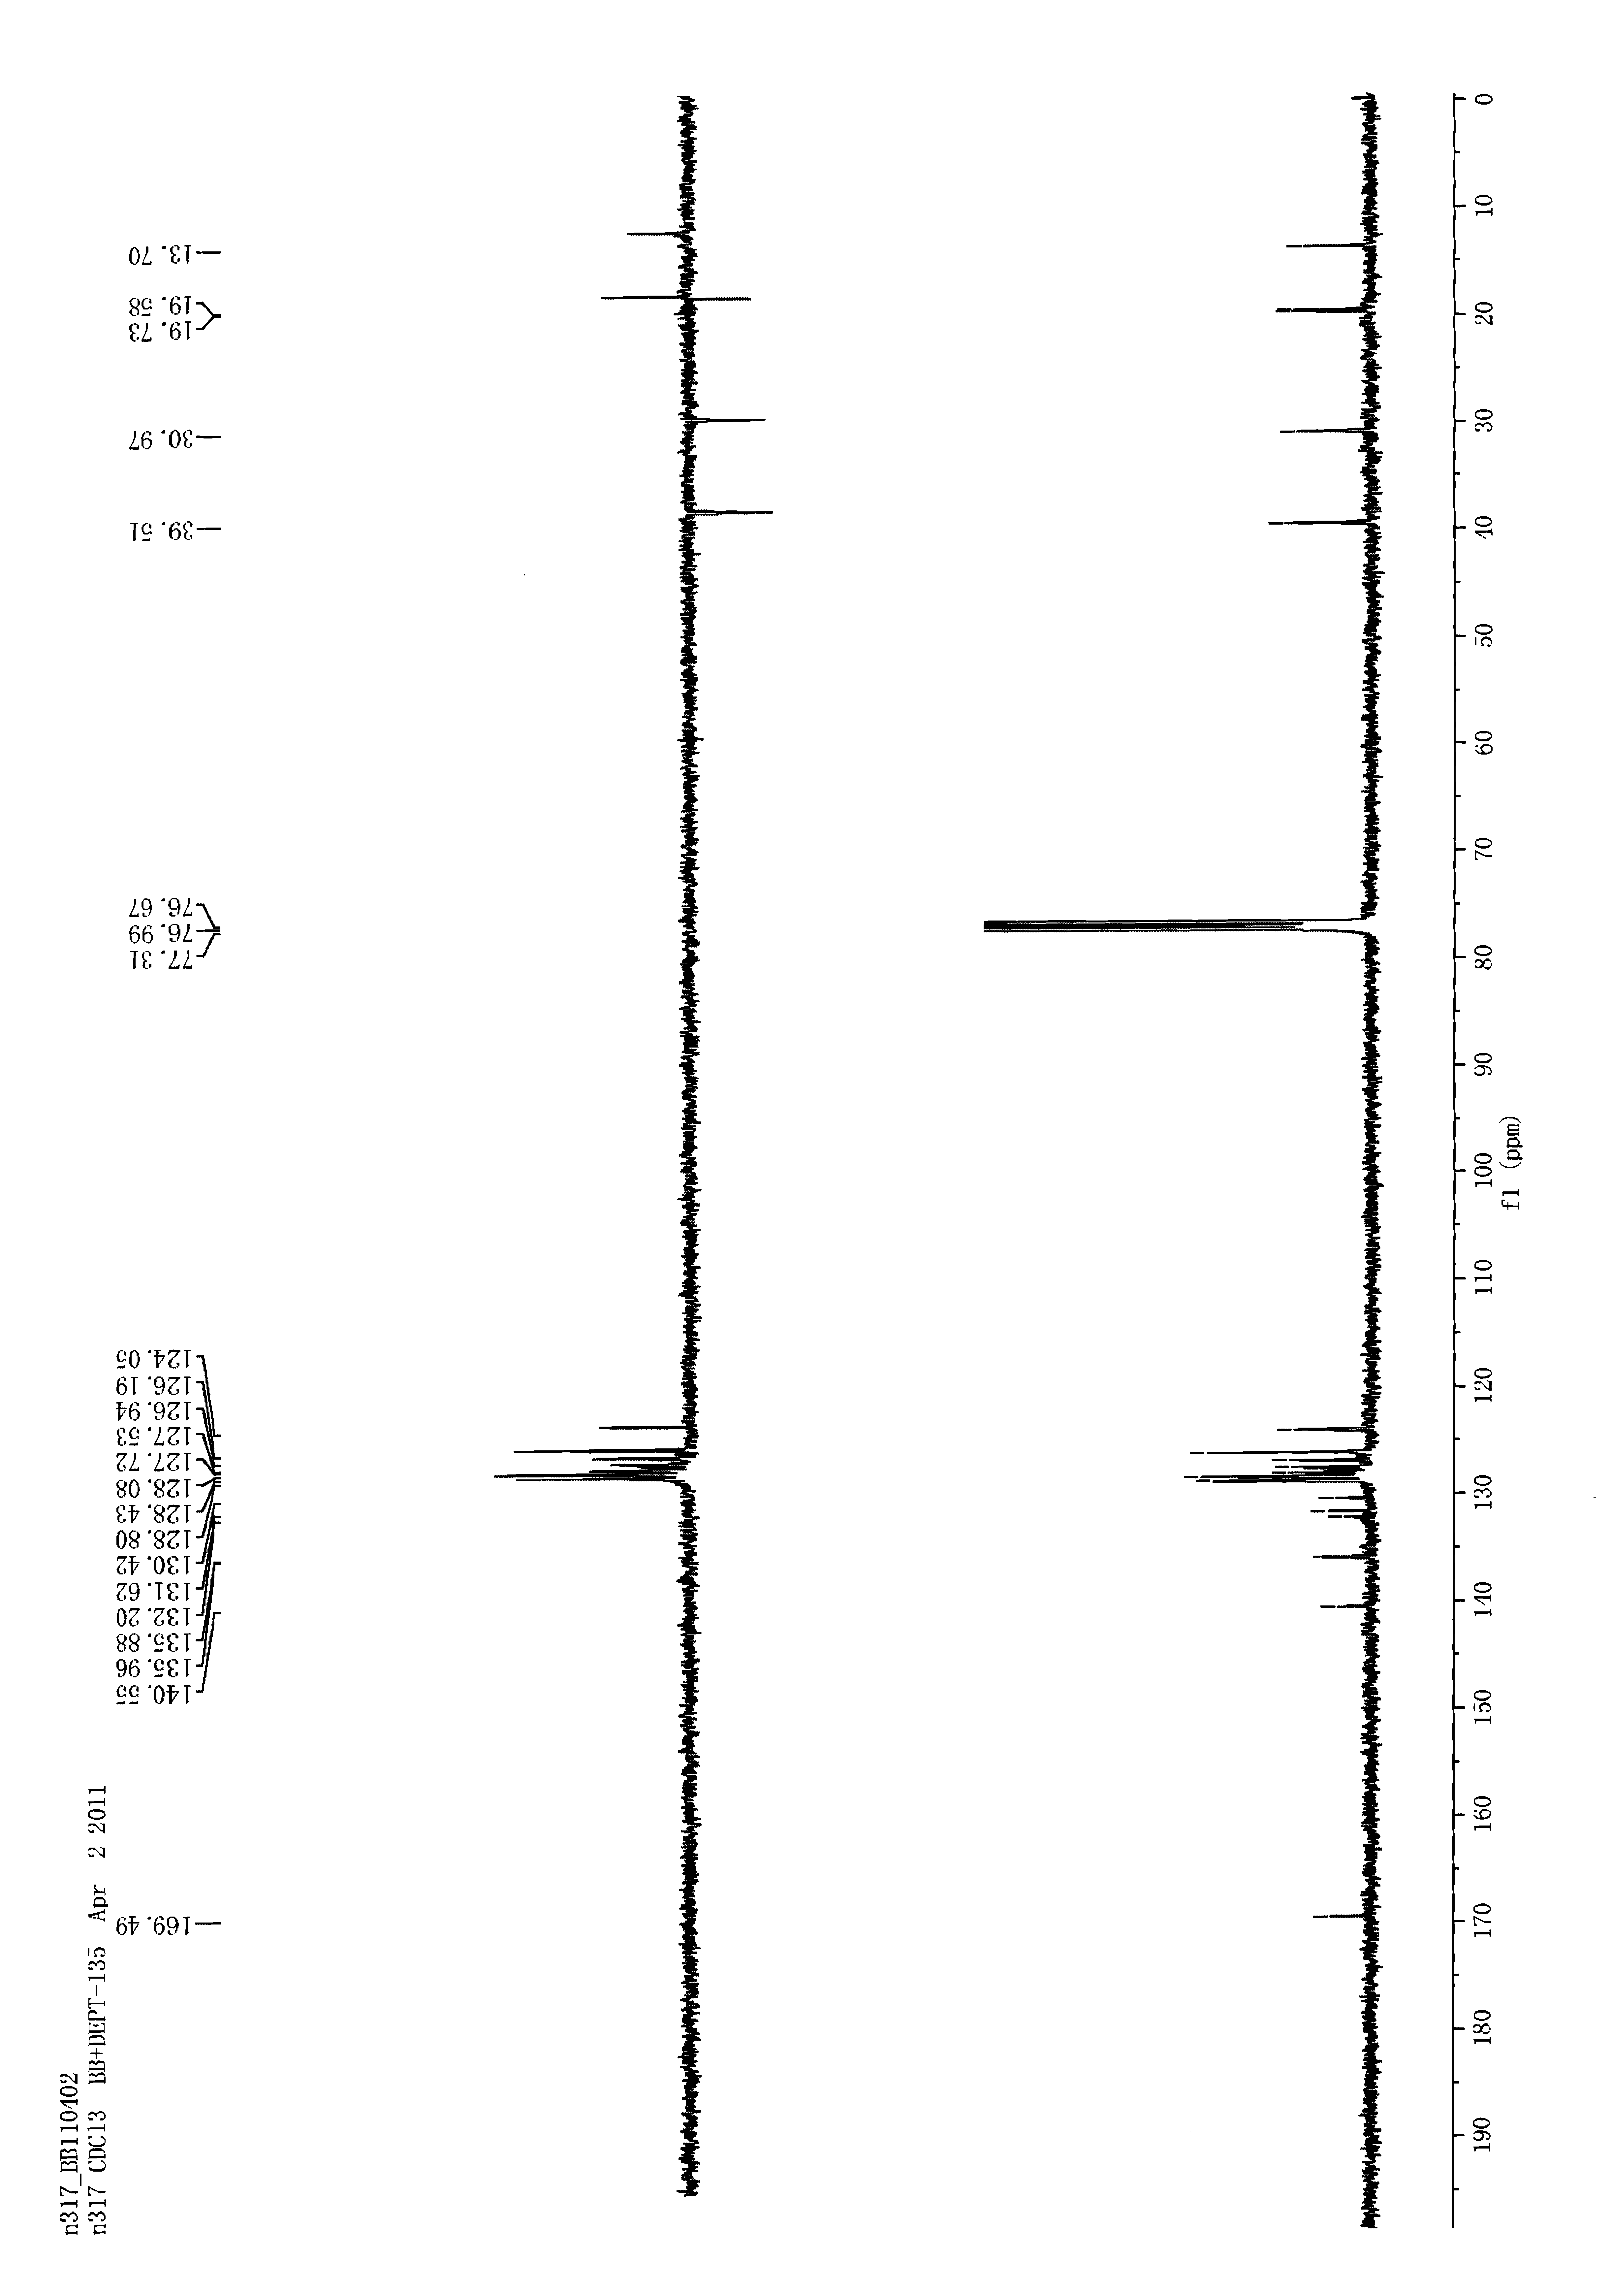
**

**1H -NMR spectra of the product of deuterated 1a with undeuterated phenylacetylene**

**
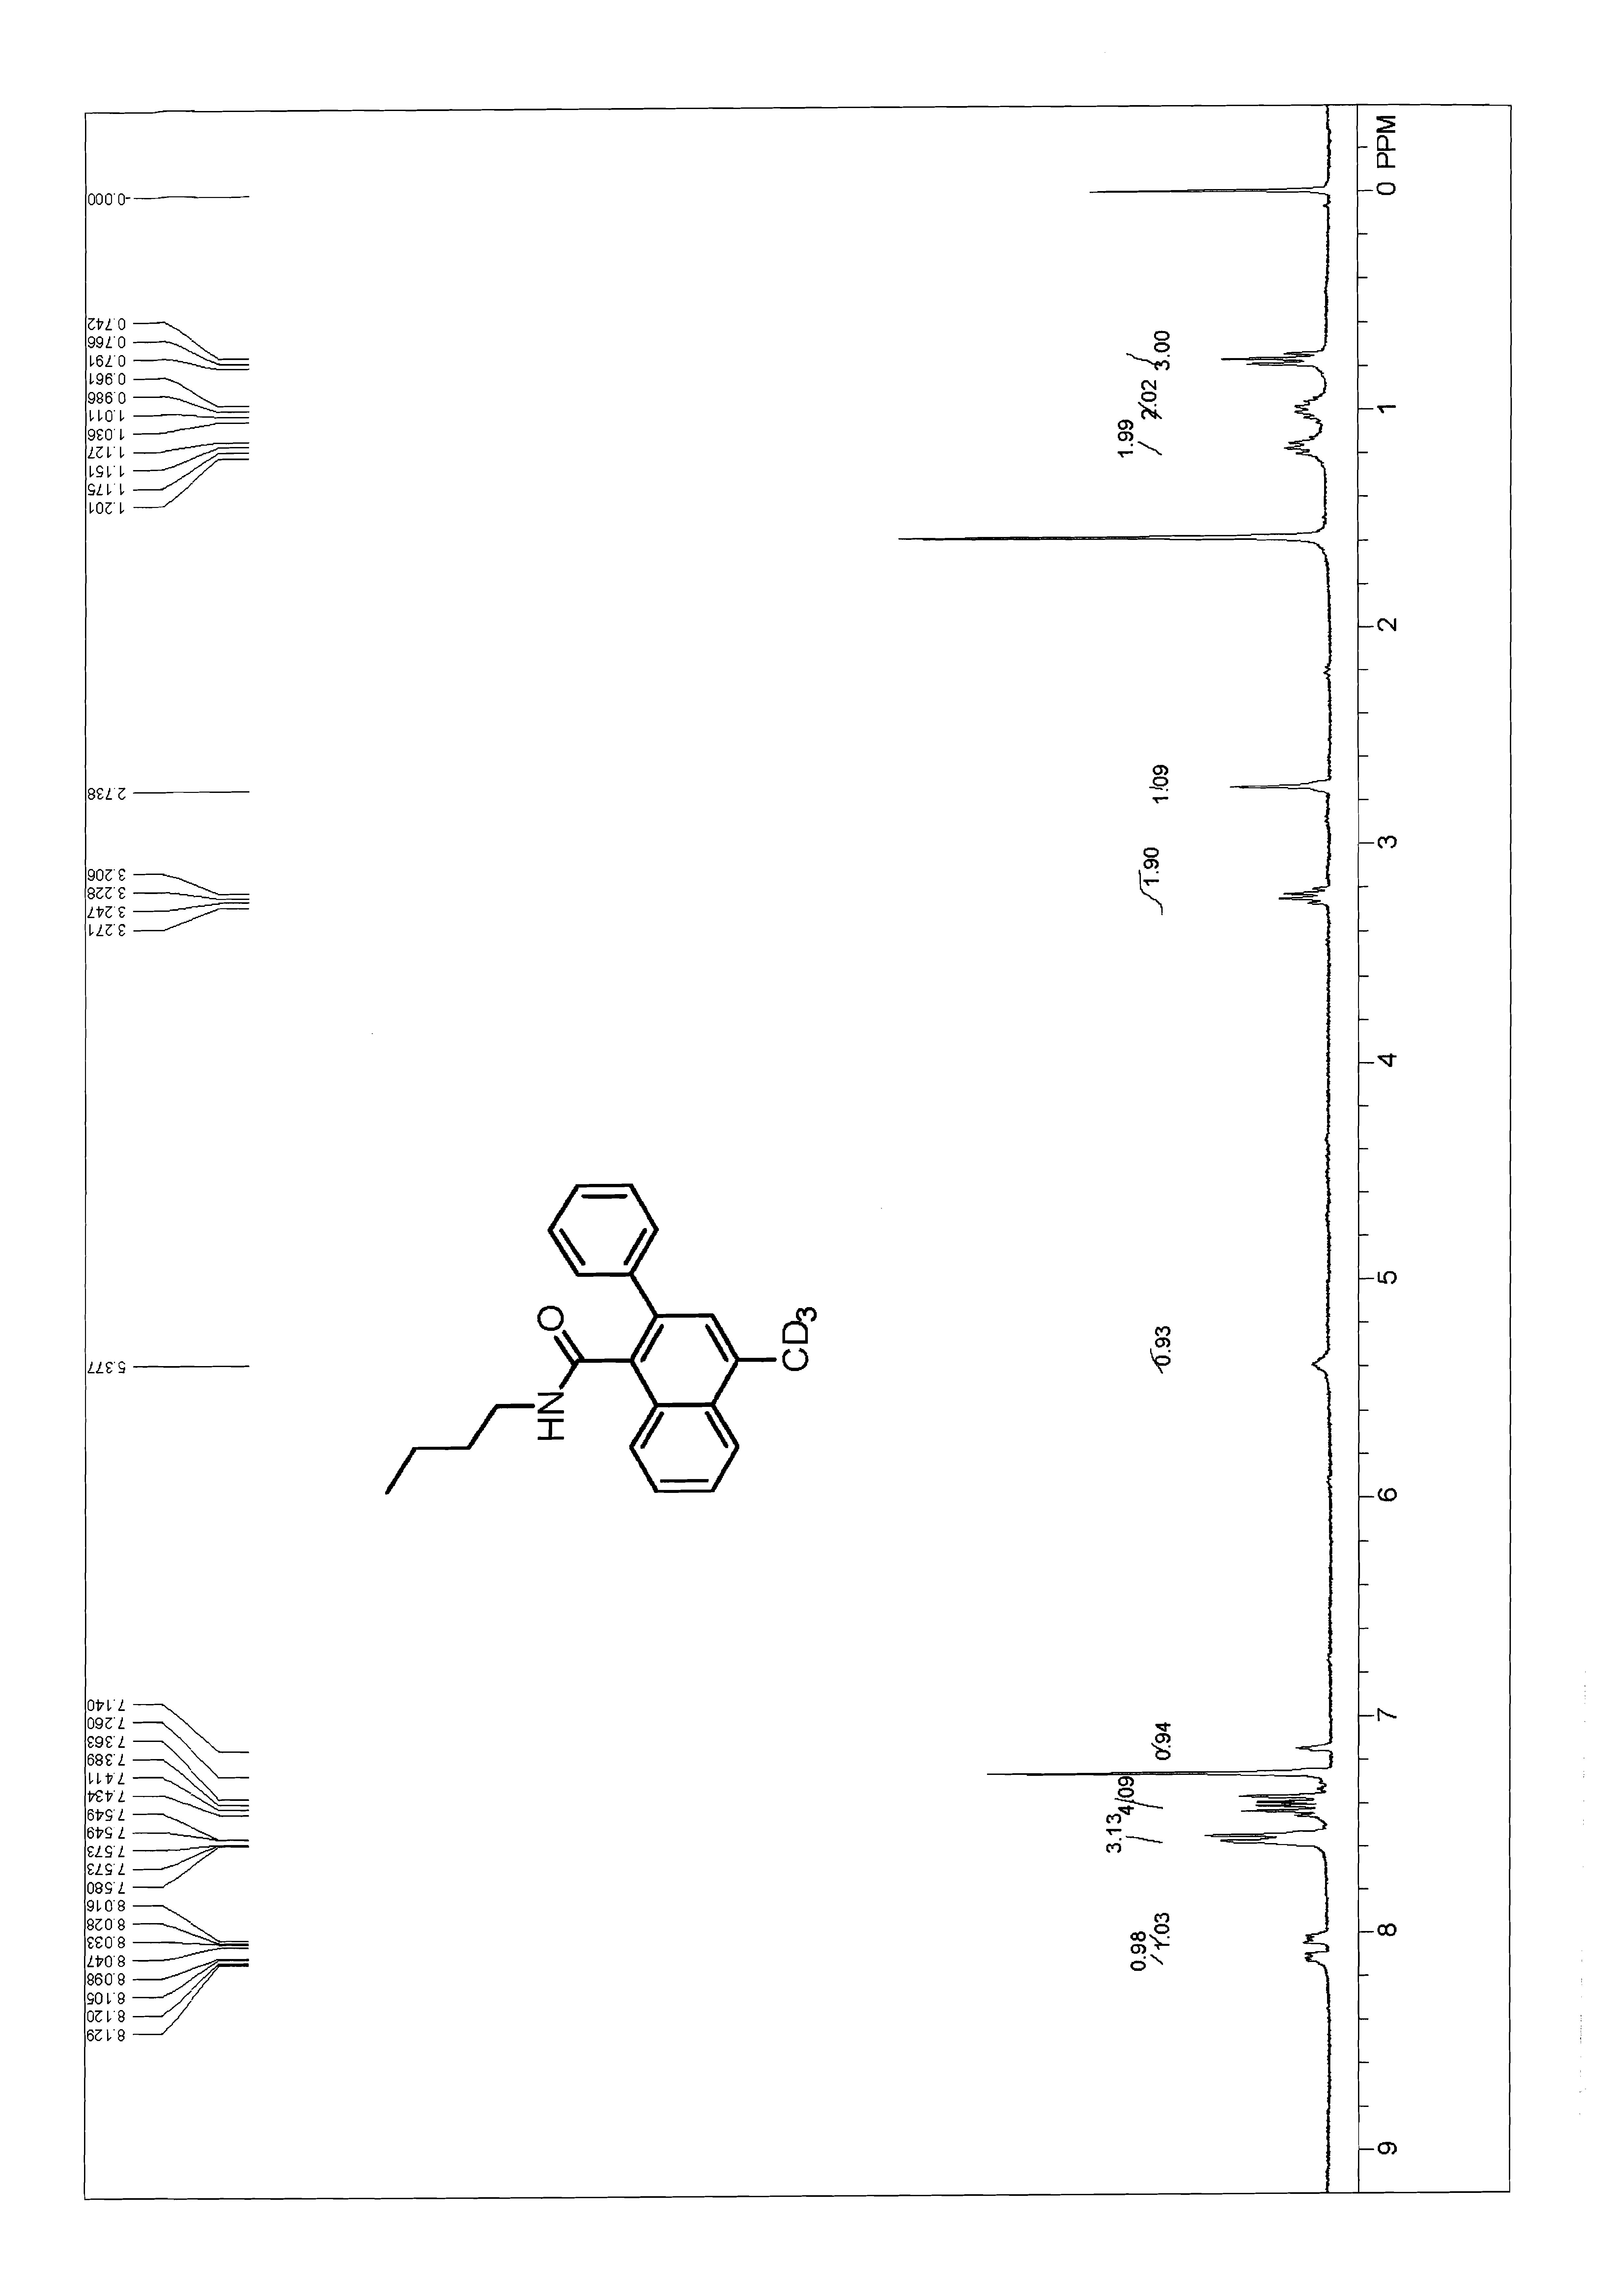
**

**1H -NMR spectra of the product of undeuterated 1a with deuterated phenylacetylene**

**
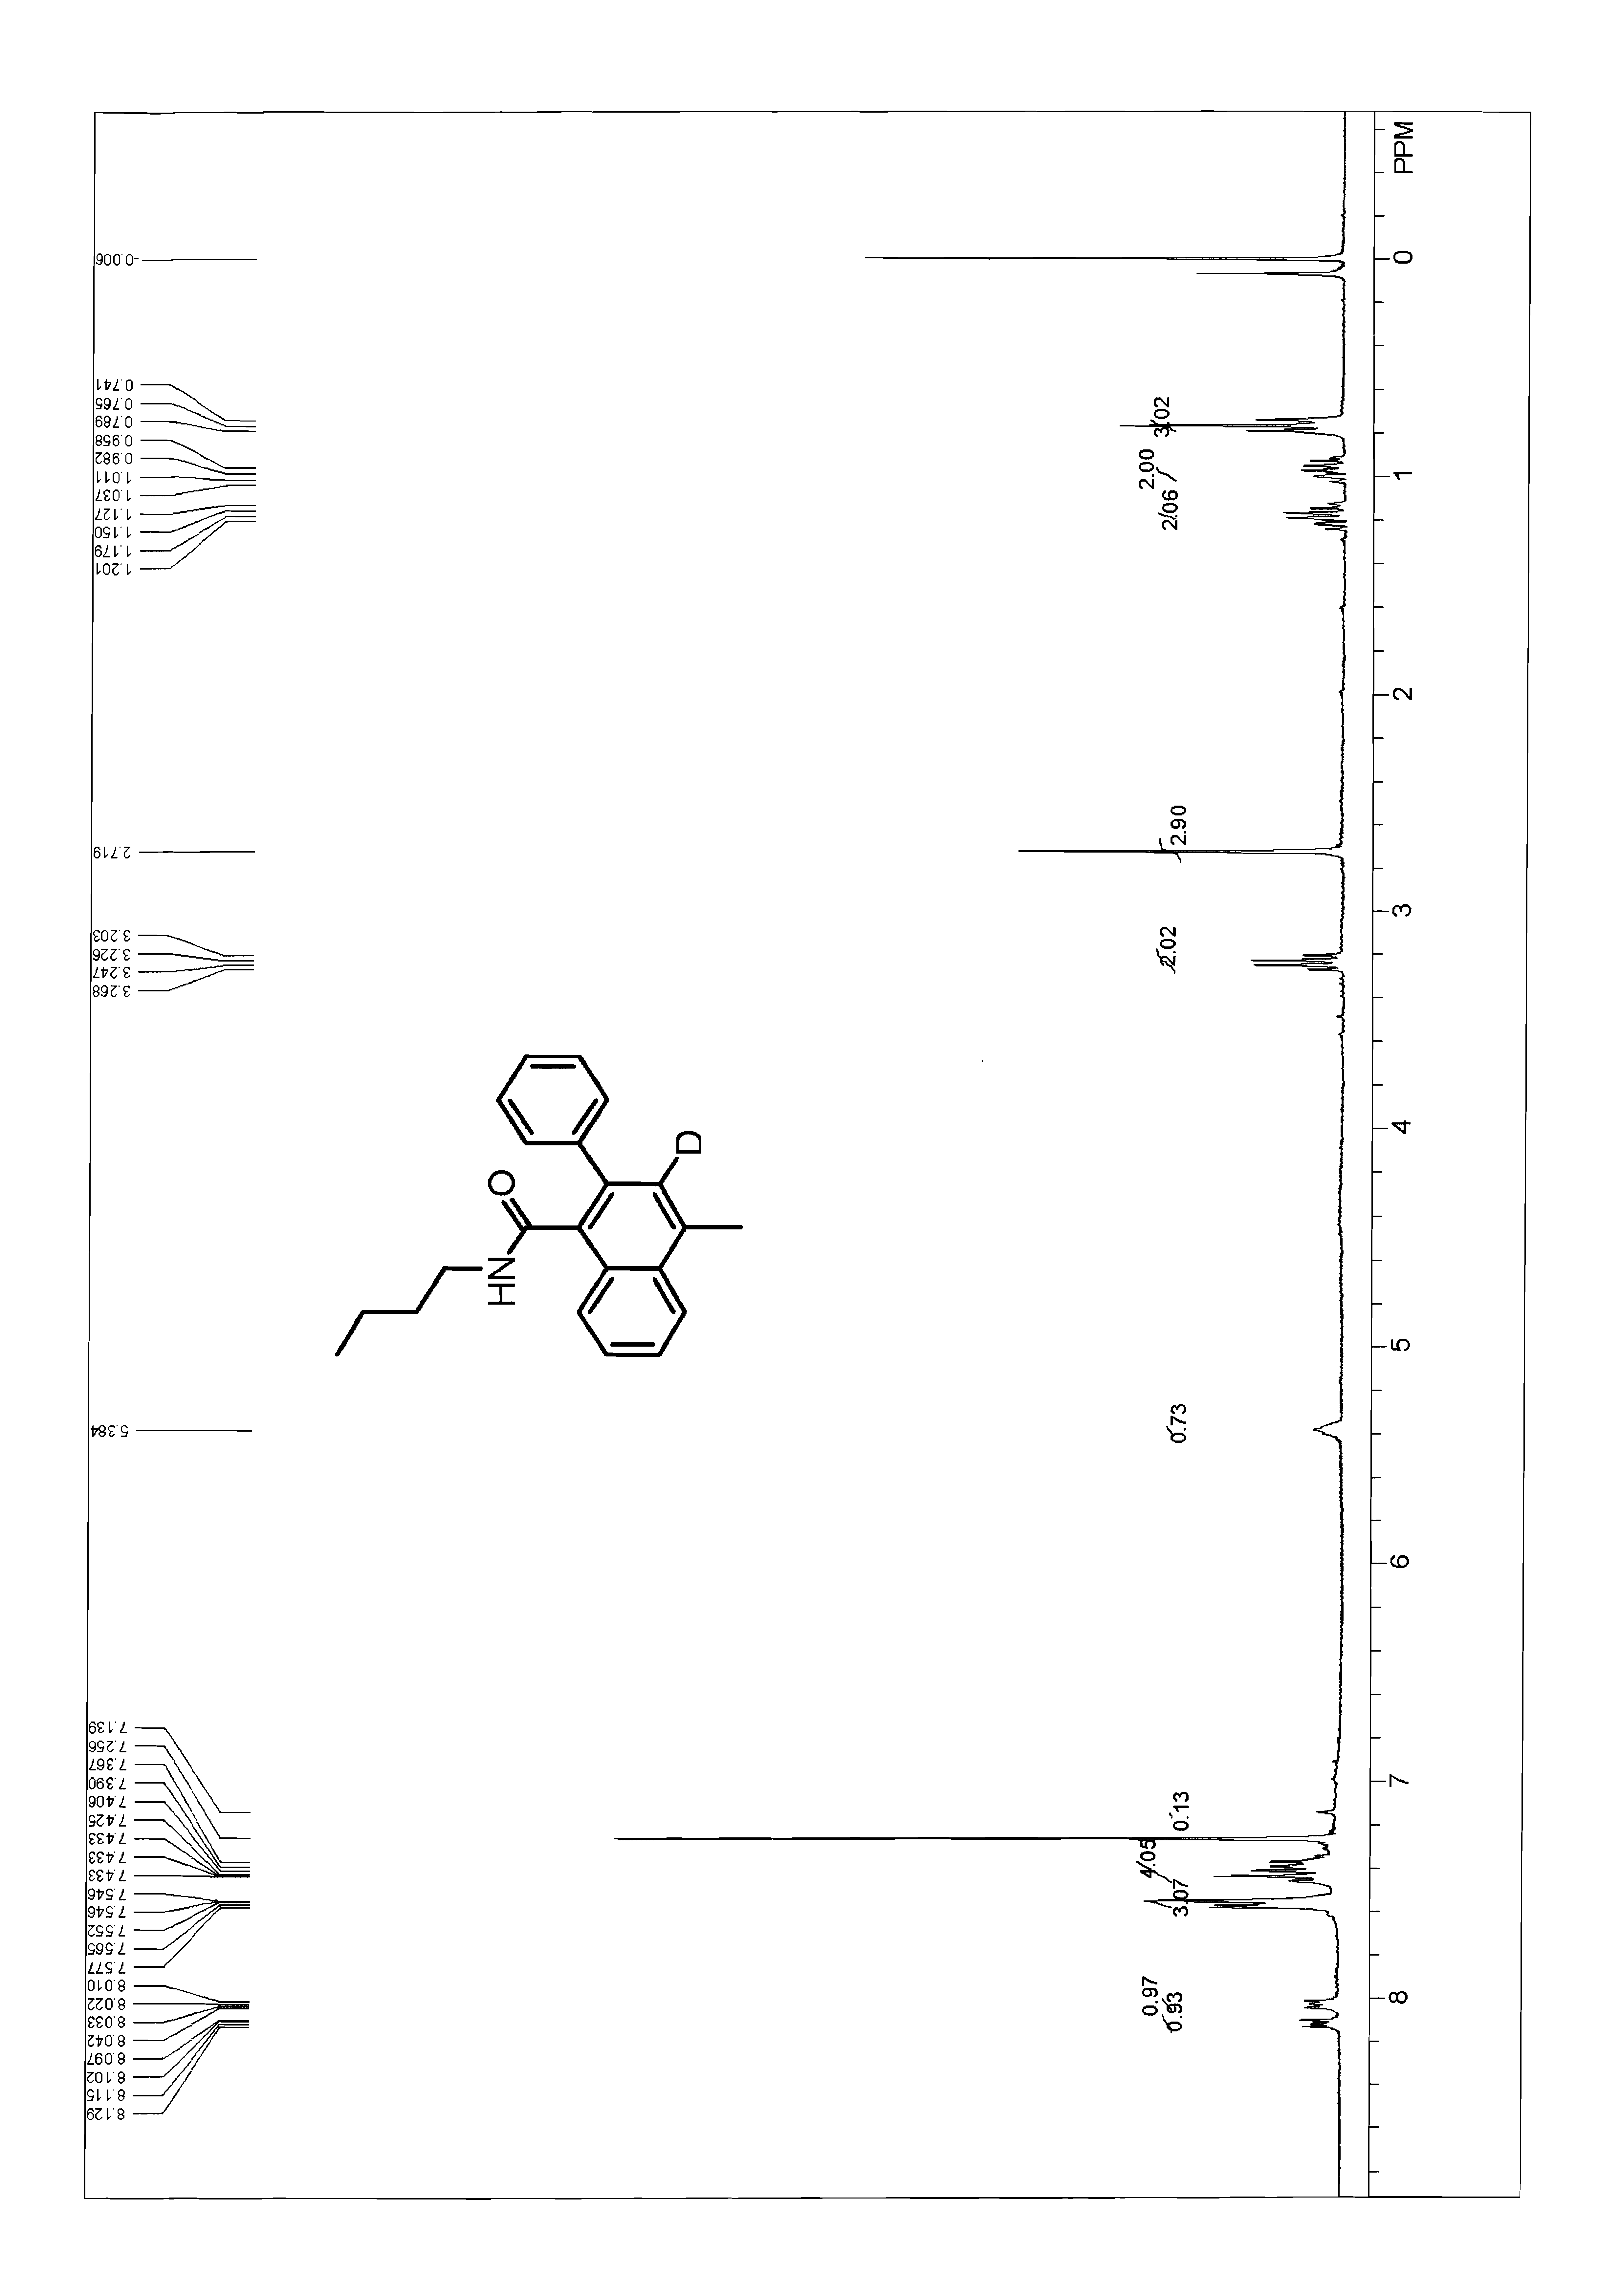
**
